# Supplementary material for: Contrasting effects of Western vs Mediterranean diets on monocyte inflammatory gene expression and social behavior in a primate model
Source: eLife journal article supplement (doi:10.7554/elife.68293), 2021-08-02
Supplement: supp [file elife_poa_e68293_Figure_4_figure_supplement_1.pdf › elife_poa_e68293_Figure_4_figure_supplement_1.pdf]

**A****Baseline Phase**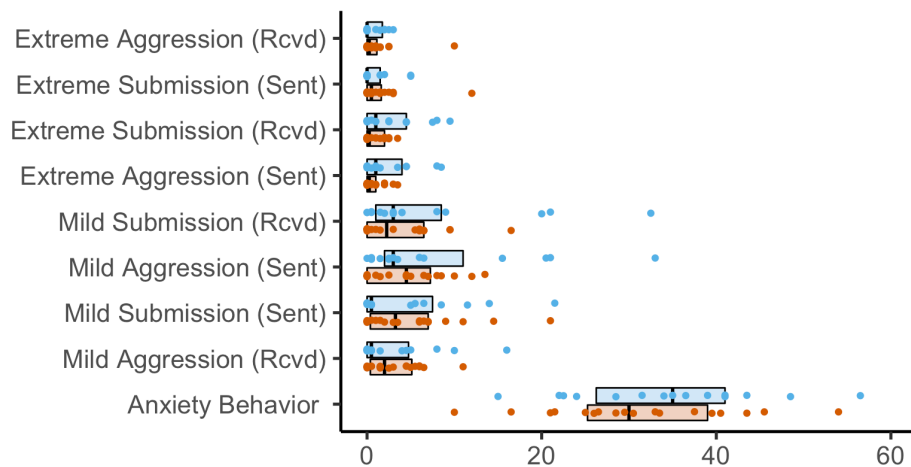**C****Experimental Phase**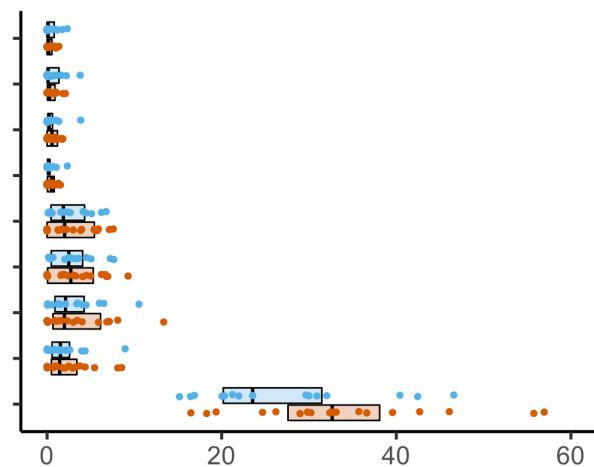

Frequency of Behavior (Events per Hour)

**B**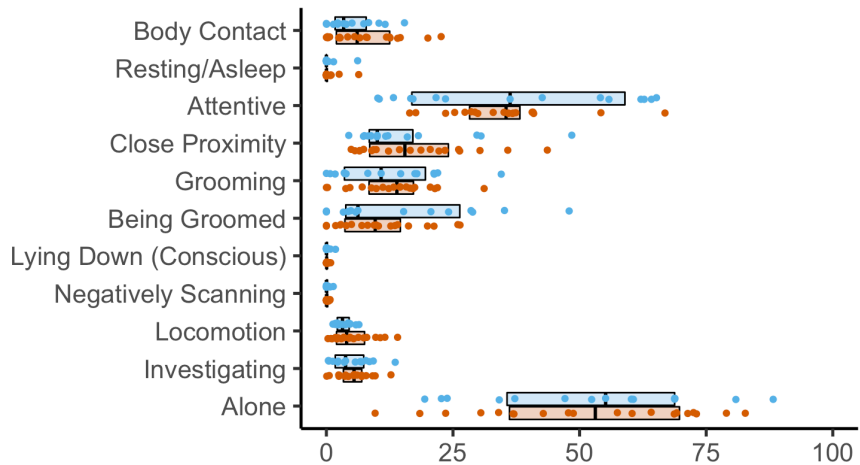**D**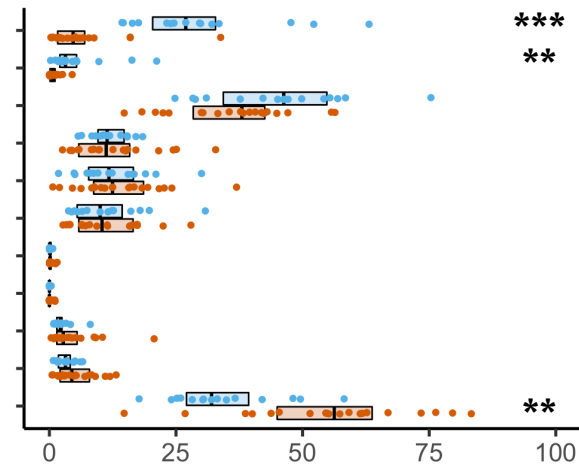

Duration of Behavior (Percent of Time)

● Western ● Mediterranean
