# Supplementary material for: Contrasting effects of Western vs Mediterranean diets on monocyte inflammatory gene expression and social behavior in a primate model
Source: eLife. 2021 Aug 2;10:e68293. doi: 10.7554/eLife.68293 (PMC8423447; doi:10.7554/eLife.68293)
Supplement: Supplementary file 1. — Suppl.tab 1A Effect of diet on gene expression. Suppl.tab 1B Effects of diet on gene expression (FDR < 0.05 β sort). Suppl.tab 2A Biological processes enriched in western genes compared to other measured genes Suppl.tab 2B. Biological processes enriched in mediterranean genes compared to other measured genes. Suppl.tab 3. Transcription factor binding site motif enrichment. Suppl.tab 4A. Diet correlation and gene set enrichment of weighted gene co-expression network analysis (WGCNA) co-expression modules. Suppl.tab 4B. Biological processes enriched in WGCNA co-expression modules. Suppl.tab 5A. Gene pair correlations across and within diet groups. Suppl.tab 5B. Differentially Correlated Genes. Suppl.tab 6A. Biological processes enriched in behavior-mediated differentially-expressed genes (DEGs) Suppl.tab 6B. Biological processes enriched in behavior-mediated western genes Suppl.tab 6C. Biological processes enriched in behavior-mediated mediterranean genes. [file elife-68293-supp1.xlsx]

## Sheet: Table_S1A
Effects of Diet on Gene Expression
Ensembl Gene ID	Gene Name	Effect Size of Diet (β)	FDR	M1/M2 Polarization Category	CTRA Category	Gene Type	Gene Decription
ENSMFAG00000013021	RF00017	1.59748	0.00450409			misc_RNA	Metazoan signal recognition particle RNA
ENSMFAG00000017987	ANKRD42	1.15256	0.00525478			protein_coding	ankyrin repeat domain 42
ENSMFAG00000039490	KLF11	0.533667	0.00525478			protein_coding	Kruppel like factor 11
ENSMFAG00000043898	ARMC5	0.373109	0.00525478			protein_coding	armadillo repeat containing 5
ENSMFAG00000046074	CLP1	-0.547883	0.00525478			protein_coding	cleavage and polyadenylation factor I subunit 1
ENSMFAG00000021421	RF01956	0.930876	0.00575523			misc_RNA
ENSMFAG00000001643		0.38101	0.00613448			protein_coding
ENSMFAG00000001850	USP20	0.38533	0.00613448			protein_coding	ubiquitin specific peptidase 20
ENSMFAG00000002833		-0.43165	0.00613448			protein_coding	proteasome subunit alpha 3
ENSMFAG00000003526	MRPL4	-0.331608	0.00613448			protein_coding	mitochondrial ribosomal protein L4
ENSMFAG00000004789	ELAC1	-0.68564	0.00613448			protein_coding	elaC ribonuclease Z 1
ENSMFAG00000005238	RF00019	0.939247	0.00613448			misc_RNA	Y RNA
ENSMFAG00000008229	RF00017	1.38348	0.00613448			misc_RNA	Metazoan signal recognition particle RNA
ENSMFAG00000011061	RF00012	1.51271	0.00613448			snoRNA	Small nucleolar RNA U3
ENSMFAG00000011354	RF00019	0.973438	0.00613448			misc_RNA	Y RNA
ENSMFAG00000015800	MIR23A	1.02153	0.00613448			miRNA	microRNA 23a
ENSMFAG00000018679	RF00492	0.460355	0.00613448			scaRNA	small Cajal body-specific RNA 17
ENSMFAG00000025849	MASP2	0.472898	0.00613448			protein_coding	mannan binding lectin serine peptidase 2
ENSMFAG00000030036	RF00283	0.507438	0.00613448			scaRNA
ENSMFAG00000030808	MEF2D	0.432192	0.00613448	Proinflammatory		protein_coding	myocyte enhancer factor 2D
ENSMFAG00000034830	MIR27A	1.18396	0.00613448			miRNA	microRNA 27a
ENSMFAG00000036338	KAT7	0.245875	0.00613448			protein_coding	lysine acetyltransferase 7
ENSMFAG00000037026	RNF34	-0.377714	0.00613448			protein_coding	ring finger protein 34
ENSMFAG00000038140	ABT1	-0.345344	0.00613448			protein_coding	activator of basal transcription 1
ENSMFAG00000039709	ITPR3	0.925987	0.00613448			protein_coding	inositol 1,4,5-trisphosphate receptor type 3
ENSMFAG00000041111	CRY1	0.457305	0.00613448			protein_coding	cryptochrome circadian regulator 1
ENSMFAG00000042049	LAPTM4B	-1.69201	0.00613448			protein_coding	lysosomal protein transmembrane 4 beta
ENSMFAG00000042962		-0.507531	0.00613448			protein_coding	neugrin, neurite outgrowth associated
ENSMFAG00000042966	C6orf89	-0.328025	0.00613448			protein_coding	chromosome 6 open reading frame 89
ENSMFAG00000044569	TP53INP2	0.634408	0.00613448			protein_coding	tumor protein p53 inducible nuclear protein 2
ENSMFAG00000044585	ARL13B	-0.569659	0.00613448			protein_coding	ADP ribosylation factor like GTPase 13B
ENSMFAG00000046314	NEK8	0.356426	0.00613448			protein_coding	NIMA related kinase 8
ENSMFAG00000001801	MMADHC	-0.423994	0.00613734			protein_coding	metabolism of cobalamin associated D
ENSMFAG00000014913	RF00019	1.26824	0.00613734			misc_RNA	Y RNA
ENSMFAG00000024592	GAR1	-0.416914	0.00613734			protein_coding	GAR1 ribonucleoprotein
ENSMFAG00000028589		-0.708273	0.00613734			protein_coding
ENSMFAG00000044656	HAT1	-0.392165	0.00613734			protein_coding	histone acetyltransferase 1
ENSMFAG00000000797	SFPQ	0.277631	0.00624097	Proinflammatory		protein_coding	splicing factor proline and glutamine rich
ENSMFAG00000002598	PSMB8	-0.606063	0.00624097			protein_coding	proteasome subunit beta 8
ENSMFAG00000006797	RF00066	1.41938	0.00624097			snRNA	U7 small nuclear RNA
ENSMFAG00000024314	RF00026	1.30123	0.00624097			snRNA	U6 spliceosomal RNA
ENSMFAG00000033777	C17orf58	-0.49781	0.00624097			protein_coding	chromosome 17 open reading frame 58
ENSMFAG00000034158	SERINC4	0.455061	0.00624097			protein_coding	serine incorporator 4
ENSMFAG00000036654	NR4A2	0.846429	0.00624097	Proinflammatory		protein_coding	nuclear receptor subfamily 4 group A member 2
ENSMFAG00000037328	TFAM	-0.394979	0.00624097			protein_coding	transcription factor A, mitochondrial
ENSMFAG00000037394	MRPL46	-0.364625	0.00624097			protein_coding	mitochondrial ribosomal protein L46
ENSMFAG00000040571	AMPD2	0.56274	0.00624097			protein_coding	adenosine monophosphate deaminase 2
ENSMFAG00000040656		-0.312795	0.00624097			protein_coding	small nuclear ribonucleoprotein U4/U6.U5 subunit 27
ENSMFAG00000043030	RGCC	1.01361	0.00624097			protein_coding	regulator of cell cycle
ENSMFAG00000043560	FBXO4	-0.430978	0.00624097			protein_coding	F-box protein 4
ENSMFAG00000045363	LEMD3	0.329932	0.00624097			protein_coding	LEM domain containing 3
ENSMFAG00000018867		-0.484812	0.00643133			pseudogene
ENSMFAG00000015746		-0.510561	0.00696466			protein_coding
ENSMFAG00000032437	KAT6B	0.35969	0.00696466			protein_coding	lysine acetyltransferase 6B
ENSMFAG00000012293	RF00019	1.36068	0.00705105			misc_RNA	Y RNA
ENSMFAG00000042817	FAM214A	0.28269	0.00705105			protein_coding	family with sequence similarity 214 member A
ENSMFAG00000000999	TSC22D2	0.439332	0.00727223			protein_coding	TSC22 domain family member 2
ENSMFAG00000010145	RF01955	0.926229	0.00727223			misc_RNA
ENSMFAG00000028402	LRRC10B	1.23717	0.00727223			protein_coding	leucine rich repeat containing 10B
ENSMFAG00000030606	ARMCX5	-0.338282	0.00727223			protein_coding	armadillo repeat containing X-linked 5
ENSMFAG00000031372	SOX4	1.08177	0.00727223			protein_coding	SRY-box transcription factor 4
ENSMFAG00000038715	NFX1	0.25684	0.00727223			protein_coding	nuclear transcription factor, X-box binding 1
ENSMFAG00000039303	CDK10	0.326579	0.00727223			protein_coding	cyclin dependent kinase 10
ENSMFAG00000045385	IFRD1	0.549932	0.00727223			protein_coding	interferon related developmental regulator 1
ENSMFAG00000000704	IGSF9	0.996145	0.00731363			protein_coding	immunoglobulin superfamily member 9
ENSMFAG00000021347	RF01957	0.660827	0.00731363			misc_RNA
ENSMFAG00000030733	HSF1	0.213176	0.00731363			protein_coding	heat shock transcription factor 1
ENSMFAG00000040329	CTH	1.17236	0.00731363	Proinflammatory		protein_coding	cystathionine gamma-lyase
ENSMFAG00000041067	SPATA2L	0.524132	0.00752858			protein_coding	spermatogenesis associated 2 like
ENSMFAG00000031756	MAP2K7	0.181394	0.007539			protein_coding	mitogen-activated protein kinase kinase 7
ENSMFAG00000002177	ITFG2	0.374499	0.00787188			protein_coding	integrin alpha FG-GAP repeat containing 2
ENSMFAG00000007053		0.871239	0.00787188			protein_coding
ENSMFAG00000037178		-0.389101	0.00787188			protein_coding	ATP synthase membrane subunit c locus 1
ENSMFAG00000021547		-0.455843	0.00787202			protein_coding	40S ribosomal protein S18
ENSMFAG00000001340		-0.326109	0.00788216			protein_coding	general transcription factor IIIC subunit 6
ENSMFAG00000001381	BRF1	0.2917	0.00788216			protein_coding	BRF1 RNA polymerase III transcription initiation factor subunit
ENSMFAG00000002731	FBRS	0.444522	0.00788216			protein_coding	fibrosin
ENSMFAG00000003429		-0.517007	0.00788216			protein_coding	HCLS1-associated protein X-1-like
ENSMFAG00000003709	STX7	-0.272942	0.00788216			protein_coding	syntaxin 7
ENSMFAG00000003728	RSRP1	0.505923	0.00788216			protein_coding	arginine and serine rich protein 1
ENSMFAG00000003865		-0.356733	0.00788216			protein_coding
ENSMFAG00000004000	UFM1	-0.422395	0.00788216			protein_coding	ubiquitin fold modifier 1
ENSMFAG00000008657		0.690298	0.00788216			protein_coding
ENSMFAG00000010161	MIR612	1.06528	0.00788216			miRNA	microRNA 612
ENSMFAG00000010600	RF00019	1.18773	0.00788216			misc_RNA	Y RNA
ENSMFAG00000010699	NHLRC1	0.546018	0.00788216			protein_coding	NHL repeat containing E3 ubiquitin protein ligase 1
ENSMFAG00000011575		-0.464132	0.00788216			protein_coding
ENSMFAG00000012605	MDH2	-0.374866	0.00788216			protein_coding	malate dehydrogenase 2
ENSMFAG00000012800	RF00019	0.919344	0.00788216			misc_RNA	Y RNA
ENSMFAG00000013579	UTP3	-0.438656	0.00788216			protein_coding	UTP3 small subunit processome component
ENSMFAG00000014564	YBEY	-0.582921	0.00788216			protein_coding	ybeY metalloendoribonuclease
ENSMFAG00000021914	RF00190	1.32518	0.00788216			snoRNA
ENSMFAG00000026728		0.963124	0.00788216			protein_coding
ENSMFAG00000028837		-0.81521	0.00788216			protein_coding
ENSMFAG00000030528	ANAPC7	-0.231886	0.00788216			protein_coding	anaphase promoting complex subunit 7
ENSMFAG00000032946	ATP6V1E1	-0.257552	0.00788216			protein_coding	ATPase H+ transporting V1 subunit E1
ENSMFAG00000033004	IRF3	-0.23546	0.00788216			protein_coding	interferon regulatory factor 3
ENSMFAG00000033387	NGDN	-0.256298	0.00788216			protein_coding	neuroguidin
ENSMFAG00000033390	WDPCP	0.264508	0.00788216			protein_coding	WD repeat containing planar cell polarity effector
ENSMFAG00000033579		-0.497674	0.00788216			protein_coding
ENSMFAG00000033871	DCUN1D5	-0.266443	0.00788216			protein_coding	defective in cullin neddylation 1 domain containing 5
ENSMFAG00000034417	CEP164	0.410937	0.00788216			protein_coding	centrosomal protein 164
ENSMFAG00000034679	PCF11	0.309829	0.00788216			protein_coding	PCF11 cleavage and polyadenylation factor subunit
ENSMFAG00000035432	ZNF335	0.413302	0.00788216			protein_coding	zinc finger protein 335
ENSMFAG00000035596	NUDCD2	-0.500337	0.00788216			protein_coding	NudC domain containing 2
ENSMFAG00000037092	UBXN7	0.231429	0.00788216			protein_coding	UBX domain protein 7
ENSMFAG00000037145	PLCB2	0.41616	0.00788216			protein_coding	phospholipase C beta 2
ENSMFAG00000037252	GTPBP1	0.325037	0.00788216			protein_coding	GTP binding protein 1
ENSMFAG00000037321	TSEN15	-0.460437	0.00788216			protein_coding	tRNA splicing endonuclease subunit 15
ENSMFAG00000037691	EIF2S1	-0.425722	0.00788216			protein_coding	eukaryotic translation initiation factor 2 subunit alpha
ENSMFAG00000037854	HECA	0.23747	0.00788216			protein_coding	hdc homolog, cell cycle regulator
ENSMFAG00000038029	FOSB	0.955783	0.00788216	Proinflammatory	Inflammatory	protein_coding	FosB proto-oncogene, AP-1 transcription factor subunit
ENSMFAG00000038128	PSMB9	-0.633485	0.00788216			protein_coding	proteasome subunit beta 9
ENSMFAG00000038464		-0.326921	0.00788216			protein_coding	ribonuclease H2 subunit B
ENSMFAG00000038545	ATP6AP2	-0.426471	0.00788216			protein_coding	ATPase H+ transporting accessory protein 2
ENSMFAG00000038575	IFT140	0.488685	0.00788216			protein_coding	intraflagellar transport 140
ENSMFAG00000038993	LMO2	-0.285977	0.00788216	Regulatory		protein_coding	LIM domain only 2
ENSMFAG00000039086	GLRX	-0.437591	0.00788216			protein_coding	glutaredoxin
ENSMFAG00000039343	PSMB1	-0.297754	0.00788216			protein_coding	proteasome subunit beta 1
ENSMFAG00000039480	STAM2	-0.224676	0.00788216			protein_coding	signal transducing adaptor molecule 2
ENSMFAG00000040113	PPA2	-0.433244	0.00788216			protein_coding	pyrophosphatase (inorganic) 2
ENSMFAG00000040517		0.244266	0.00788216			protein_coding	DDB1 and CUL4 associated factor 8
ENSMFAG00000040677	MIR599	1.50186	0.00788216			miRNA	microRNA 599
ENSMFAG00000040767	EIF3M	-0.419152	0.00788216			protein_coding	eukaryotic translation initiation factor 3 subunit M
ENSMFAG00000041041	PHAX	-0.408248	0.00788216			protein_coding	phosphorylated adaptor for RNA export
ENSMFAG00000041093		-0.562405	0.00788216			protein_coding
ENSMFAG00000041542	MAK	0.845707	0.00788216			protein_coding	male germ cell associated kinase
ENSMFAG00000041736	ERGIC2	-0.326748	0.00788216			protein_coding	ERGIC and golgi 2
ENSMFAG00000043364	C1orf174	-0.37893	0.00788216			protein_coding	chromosome 1 open reading frame 174
ENSMFAG00000043452	LYPLA1	-0.501219	0.00788216			protein_coding	lysophospholipase 1
ENSMFAG00000043557	HAUS1	-0.276399	0.00788216			protein_coding	HAUS augmin like complex subunit 1
ENSMFAG00000043879	BAG2	0.939265	0.00788216			protein_coding	BCL2 associated athanogene 2
ENSMFAG00000044201	C9orf131	0.758367	0.00788216			protein_coding	chromosome 9 open reading frame 131
ENSMFAG00000044217	TSN	-0.329269	0.00788216			protein_coding	translin
ENSMFAG00000044349	CCNQ	-0.233415	0.00788216			protein_coding	cyclin Q
ENSMFAG00000044806	DMAC1	-0.487564	0.00788216			protein_coding	distal membrane arm assembly complex 1
ENSMFAG00000044839	JMY	0.466908	0.00788216			protein_coding	junction mediating and regulatory protein, p53 cofactor
ENSMFAG00000045503	CLK3	0.226678	0.00788216			protein_coding	CDC like kinase 3
ENSMFAG00000045542	FOXJ1	2.17719	0.00788216			protein_coding	forkhead box J1
ENSMFAG00000045569	LIN7C	-0.385129	0.00788216			protein_coding	lin-7 homolog C, crumbs cell polarity complex component
ENSMFAG00000045642	MTSS1	0.512448	0.00788216	Regulatory		protein_coding	MTSS I-BAR domain containing 1
ENSMFAG00000046307	NDUFAF3	0.326416	0.00788216			protein_coding	NADH:ubiquinone oxidoreductase complex assembly factor 3
ENSMFAG00000046417	COX1	0.556763	0.00788216			protein_coding	cytochrome c oxidase subunit I
ENSMFAG00000029809	TLR1	-0.487	0.00800124			protein_coding	Macaca fascicularis toll like receptor 1 (TLR1), mRNA.
ENSMFAG00000036228	SIVA1	-0.270422	0.00800124			protein_coding	SIVA1 apoptosis inducing factor
ENSMFAG00000002826	DPH6	-0.299346	0.00812125			protein_coding	diphthamine biosynthesis 6
ENSMFAG00000037745	RTP4	-0.754447	0.00812218			protein_coding	receptor transporter protein 4
ENSMFAG00000001487		-0.291272	0.00821825			protein_coding	NADH:ubiquinone oxidoreductase core subunit V2
ENSMFAG00000008900	MIR590	0.770216	0.00821825			miRNA	microRNA 590
ENSMFAG00000018877	RF00026	1.3751	0.00821825			snRNA	U6 spliceosomal RNA
ENSMFAG00000030327	B3GALT2	0.731543	0.00821825			protein_coding	beta-1,3-galactosyltransferase 2
ENSMFAG00000031113	C7orf50	-0.285281	0.00821825			protein_coding	chromosome 7 open reading frame 50
ENSMFAG00000031220	SESN1	0.442474	0.00821825			protein_coding	sestrin 1
ENSMFAG00000001421	SERPINB1	-0.441042	0.00824044	Proinflammatory		protein_coding	serpin family B member 1
ENSMFAG00000004049	C1orf131	-0.306527	0.00826235			protein_coding	chromosome 1 open reading frame 131
ENSMFAG00000036793	KANSL3	0.343727	0.00828157			protein_coding	KAT8 regulatory NSL complex subunit 3
ENSMFAG00000001704	RALA	-0.366667	0.00838415			protein_coding	RAS like proto-oncogene A
ENSMFAG00000003605		0.82916	0.00838415			protein_coding
ENSMFAG00000007015	RF00217	0.724928	0.00838415			snoRNA	small nucleolar RNA, C/D box 20
ENSMFAG00000020573	ARMC1	-0.467081	0.00838415			protein_coding	armadillo repeat containing 1
ENSMFAG00000025920	EPM2AIP1	0.429924	0.00838415			protein_coding	EPM2A interacting protein 1
ENSMFAG00000044371	SRP54	-0.284924	0.00838415			protein_coding	signal recognition particle 54
ENSMFAG00000046407	MUT	-0.35051	0.00838415			protein_coding	methylmalonyl-CoA mutase
ENSMFAG00000001442	MAFG	0.480383	0.00839172			protein_coding	MAF bZIP transcription factor G
ENSMFAG00000031263	SRFBP1	-0.407917	0.00839172			protein_coding	serum response factor binding protein 1
ENSMFAG00000003435	SETD1A	0.33409	0.00842409			protein_coding	SET domain containing 1A, histone lysine methyltransferase
ENSMFAG00000006874	OAZ1	-0.34075	0.00842409			protein_coding	ornithine decarboxylase antizyme 1
ENSMFAG00000030897	ZNF22	-0.318666	0.00842409			protein_coding	zinc finger protein 22
ENSMFAG00000031186	MTA1	0.221993	0.00842409			protein_coding	metastasis associated 1
ENSMFAG00000031869	CHAD	0.514327	0.00842409			protein_coding	chondroadherin
ENSMFAG00000032041	ZNF468	-0.385059	0.00842409			protein_coding	zinc finger protein 468
ENSMFAG00000035724	COX16	-0.377706	0.00842409			protein_coding	cytochrome c oxidase assembly factor COX16
ENSMFAG00000035808		-0.421067	0.00842409			protein_coding
ENSMFAG00000036743	PRPF19	-0.340389	0.00842409			protein_coding	pre-mRNA processing factor 19
ENSMFAG00000040270	TTC1	-0.294524	0.00842409			protein_coding	tetratricopeptide repeat domain 1
ENSMFAG00000041236	DYRK3	1.54723	0.00842409			protein_coding	dual specificity tyrosine phosphorylation regulated kinase 3
ENSMFAG00000043122	NDUFA9	-0.328752	0.00842409			protein_coding	NADH:ubiquinone oxidoreductase subunit A9
ENSMFAG00000045469	XRCC3	0.598177	0.00842409			protein_coding	X-ray repair cross complementing 3
ENSMFAG00000027496	ZNF324	0.37811	0.00855901			protein_coding	zinc finger protein 324
ENSMFAG00000036908	PEX2	-0.298837	0.00855901			protein_coding	peroxisomal biogenesis factor 2
ENSMFAG00000037186	PRKD3	-0.306753	0.00855901			protein_coding	protein kinase D3
ENSMFAG00000043258	TMEM128	-0.372988	0.00855901			protein_coding	transmembrane protein 128
ENSMFAG00000043680		0.358644	0.00855901			protein_coding	regulator of telomere elongation helicase 1
ENSMFAG00000037055	FER1L5	0.490507	0.00856222			protein_coding	fer-1 like family member 5
ENSMFAG00000039648		-0.260306	0.00856222			protein_coding	NEDD8 ubiquitin like modifier
ENSMFAG00000046369	UBR1	0.325097	0.00856222			protein_coding	ubiquitin protein ligase E3 component n-recognin 1
ENSMFAG00000001360	BCL6	0.457814	0.0085795			protein_coding	BCL6 transcription repressor
ENSMFAG00000002666	MYSM1	0.286799	0.0085795			protein_coding	Myb like, SWIRM and MPN domains 1
ENSMFAG00000003899	DGAT1	0.229006	0.0085795			protein_coding	diacylglycerol O-acyltransferase 1
ENSMFAG00000016861	POLR2C	-0.286514	0.0085795			protein_coding	RNA polymerase II subunit C
ENSMFAG00000024601	VASN	0.932553	0.0085795			protein_coding	vasorin
ENSMFAG00000030983	VAV3	0.255948	0.0085795	Proinflammatory		protein_coding	vav guanine nucleotide exchange factor 3
ENSMFAG00000031880	STRIP1	0.227373	0.0085795			protein_coding	Macaca fascicularis striatin interacting protein 1 (STRIP1), mRNA.
ENSMFAG00000037959	UNC50	-0.422624	0.0085795			protein_coding	unc-50 inner nuclear membrane RNA binding protein
ENSMFAG00000038062		-0.372959	0.0085795			protein_coding	angiogenic factor with G-patch and FHA domains 1
ENSMFAG00000043193		-0.388506	0.0085795			protein_coding	NDUFA4 mitochondrial complex associated
ENSMFAG00000046344	EPB41	-0.199909	0.0085795	Proinflammatory		protein_coding	erythrocyte membrane protein band 4.1
ENSMFAG00000000399	CBX3	-0.308605	0.00864991			protein_coding	chromobox 3
ENSMFAG00000014353	AKAP17A	0.344715	0.00866072			protein_coding	A-kinase anchoring protein 17A
ENSMFAG00000041230	ZSWIM4	0.545341	0.00866072			protein_coding	zinc finger SWIM-type containing 4
ENSMFAG00000042056		-0.306669	0.00866072			protein_coding	replication protein A3
ENSMFAG00000046269	CUL7	0.323405	0.00866072			protein_coding	cullin 7
ENSMFAG00000016251	TMEM60	-0.451513	0.00866382			protein_coding	transmembrane protein 60
ENSMFAG00000016329	RF00001	0.86311	0.00866382			rRNA	5S ribosomal RNA
ENSMFAG00000036648	UBA3	-0.213315	0.00866382			protein_coding	ubiquitin like modifier activating enzyme 3
ENSMFAG00000038316	POMT1	0.324967	0.00866382			protein_coding	protein O-mannosyltransferase 1
ENSMFAG00000031058	PRCC	0.243453	0.00868522			protein_coding	proline rich mitotic checkpoint control factor
ENSMFAG00000031671	GTF2E2	-0.275851	0.00868522			protein_coding	general transcription factor IIE subunit 2
ENSMFAG00000033651	ANXA4	-0.477285	0.00868522	Regulatory		protein_coding	annexin A4
ENSMFAG00000033920	SNX12	-0.251984	0.00868522			protein_coding	sorting nexin 12
ENSMFAG00000035835		-0.318454	0.00868522			protein_coding	coiled-coil domain containing 25
ENSMFAG00000038961	SMCO3	1.43118	0.00868522			protein_coding	single-pass membrane protein with coiled-coil domains 3
ENSMFAG00000043032	ZBTB40	0.43936	0.00868522			protein_coding	zinc finger and BTB domain containing 40
ENSMFAG00000043530	USP1	-0.265876	0.00868522			protein_coding	ubiquitin specific peptidase 1
ENSMFAG00000045867	MFSD5	-0.383591	0.00868522			protein_coding	major facilitator superfamily domain containing 5
ENSMFAG00000002721	LLPH	-0.242262	0.00869861			protein_coding	LLP homolog, long-term synaptic facilitation factor
ENSMFAG00000002908	PURB	0.442358	0.00869861			protein_coding	purine rich element binding protein B
ENSMFAG00000010690	MIR1282	0.965798	0.00869861			miRNA	microRNA 1282
ENSMFAG00000025459	TRMT44	0.332212	0.00869861			protein_coding	tRNA methyltransferase 44 homolog
ENSMFAG00000028267	HNRNPH1	0.219605	0.00869861			protein_coding	heterogeneous nuclear ribonucleoprotein H1
ENSMFAG00000030153	ACTL6A	-0.411055	0.00869861			protein_coding	actin like 6A
ENSMFAG00000031617	ACOT2	-0.444046	0.00869861			protein_coding	acyl-CoA thioesterase 2
ENSMFAG00000032121	CLASRP	0.333052	0.00869861			protein_coding	CLK4 associating serine/arginine rich protein
ENSMFAG00000035423	MAP1LC3A	0.488107	0.00869861			protein_coding	microtubule associated protein 1 light chain 3 alpha
ENSMFAG00000035725	ARL1	-0.447864	0.00869861			protein_coding	ADP ribosylation factor like GTPase 1
ENSMFAG00000035826	ATP13A2	0.386167	0.00869861			protein_coding	ATPase cation transporting 13A2
ENSMFAG00000036296	PRKAA1	-0.306384	0.00869861			protein_coding	protein kinase AMP-activated catalytic subunit alpha 1
ENSMFAG00000037144	LENG9	0.674227	0.00869861			protein_coding	leukocyte receptor cluster member 9
ENSMFAG00000037554	MTFR1L	-0.26266	0.00869861			protein_coding	mitochondrial fission regulator 1 like
ENSMFAG00000037582	CTSO	-0.451415	0.00869861			protein_coding	cathepsin O
ENSMFAG00000040033	MIEF2	0.433805	0.00869861			protein_coding	mitochondrial elongation factor 2
ENSMFAG00000045071	PDCD10	-0.286918	0.00869861			protein_coding	programmed cell death 10
ENSMFAG00000045178	GNPNAT1	-0.306823	0.00869861			protein_coding	glucosamine-phosphate N-acetyltransferase 1
ENSMFAG00000046009	NEIL1	0.365111	0.00869861			protein_coding	nei like DNA glycosylase 1
ENSMFAG00000014032	RF00026	1.06715	0.00870791			snRNA	U6 spliceosomal RNA
ENSMFAG00000046398	MNT	0.522359	0.00876962			protein_coding	MAX network transcriptional repressor
ENSMFAG00000000822	RAB11FIP2	-0.258225	0.00882592			protein_coding	RAB11 family interacting protein 2
ENSMFAG00000000878	CCDC17	0.558242	0.00882592			protein_coding	coiled-coil domain containing 17
ENSMFAG00000002217	AIDA	-0.412059	0.00882592			protein_coding	axin interactor, dorsalization associated
ENSMFAG00000033226		0.451216	0.00882592			protein_coding	receptor-type tyrosine-protein phosphatase epsilon-like
ENSMFAG00000033296	PYCARD	-0.280489	0.00882592			protein_coding	PYD and CARD domain containing
ENSMFAG00000039164		-0.443172	0.00882592			protein_coding	putative elongation factor 1-alpha-like 3
ENSMFAG00000044343		-0.449281	0.00882592			protein_coding	riboflavin kinase
ENSMFAG00000039160	TTI2	-0.345031	0.00888513			protein_coding	TELO2 interacting protein 2
ENSMFAG00000013244		0.971439	0.00891099			miRNA
ENSMFAG00000033605	TIGAR	-0.327477	0.00891099			protein_coding	TP53 induced glycolysis regulatory phosphatase
ENSMFAG00000034129		-0.257299	0.00891099			protein_coding	mitochondrial ribosomal protein S36
ENSMFAG00000035870	KLF4	0.569178	0.00891099			protein_coding	Kruppel like factor 4
ENSMFAG00000036612	ISCA2	-0.303899	0.00891099			protein_coding	iron-sulfur cluster assembly 2
ENSMFAG00000037417	RF00019	1.12563	0.00891099			misc_RNA	Y RNA
ENSMFAG00000040254		-0.212786	0.00891099			protein_coding	NADH:ubiquinone oxidoreductase subunit A3
ENSMFAG00000000169		-0.344925	0.00893433			protein_coding
ENSMFAG00000001077	PLK2	1.22187	0.00893433			protein_coding	polo like kinase 2
ENSMFAG00000002125	PSMA4	-0.429656	0.00893433			protein_coding	proteasome subunit alpha 4
ENSMFAG00000002174	PFDN4	-0.287279	0.00893433			protein_coding	prefoldin subunit 4
ENSMFAG00000002244	VMA21	-0.474448	0.00893433			protein_coding	vacuolar ATPase assembly factor VMA21
ENSMFAG00000002471	CPTP	0.206293	0.00893433			protein_coding	ceramide-1-phosphate transfer protein
ENSMFAG00000002529	CDK6	0.455413	0.00893433			protein_coding	cyclin dependent kinase 6
ENSMFAG00000003093	USP36	0.314209	0.00893433			protein_coding	ubiquitin specific peptidase 36
ENSMFAG00000003112	WDR91	0.310224	0.00893433	Proinflammatory		protein_coding	WD repeat domain 91
ENSMFAG00000003221	TGIF1	0.480245	0.00893433			protein_coding	TGFB induced factor homeobox 1
ENSMFAG00000003625	ID1	1.65473	0.00893433	Proinflammatory		protein_coding	inhibitor of DNA binding 1, HLH protein
ENSMFAG00000003831	PRMT2	-0.316696	0.00893433			protein_coding	protein arginine methyltransferase 2
ENSMFAG00000008510	HGS	0.246709	0.00893433			protein_coding	hepatocyte growth factor-regulated tyrosine kinase substrate
ENSMFAG00000011286		-0.418842	0.00893433			miRNA
ENSMFAG00000011428	RF00066	1.31917	0.00893433			snRNA	U7 small nuclear RNA
ENSMFAG00000012556	PGBD4	0.757575	0.00893433			protein_coding	piggyBac transposable element derived 4
ENSMFAG00000020536	ZNF446	0.434557	0.00893433			protein_coding	zinc finger protein 446
ENSMFAG00000021322	ADRB2	1.05575	0.00893433			protein_coding	adrenoceptor beta 2
ENSMFAG00000026682	KYAT3	-0.323761	0.00893433			protein_coding	kynurenine aminotransferase 3
ENSMFAG00000029749	ECHDC1	-0.302677	0.00893433			protein_coding	ethylmalonyl-CoA decarboxylase 1
ENSMFAG00000031732	LRRC8C	-0.336896	0.00893433	Proinflammatory		protein_coding	leucine rich repeat containing 8 VRAC subunit C
ENSMFAG00000031944	ABHD13	-0.288649	0.00893433			protein_coding	abhydrolase domain containing 13
ENSMFAG00000032989	SUCNR1	-1.16154	0.00893433			protein_coding	succinate receptor 1
ENSMFAG00000033044	INSIG2	-0.362048	0.00893433			protein_coding	insulin induced gene 2
ENSMFAG00000033411	AHI1	0.669592	0.00893433			protein_coding	Abelson helper integration site 1
ENSMFAG00000033583	HAUS8	0.397691	0.00893433			protein_coding	HAUS augmin like complex subunit 8
ENSMFAG00000033875	SLC22A5	0.497348	0.00893433			protein_coding	solute carrier family 22 member 5
ENSMFAG00000034319	C1orf162	-0.397295	0.00893433			protein_coding	chromosome 1 open reading frame 162
ENSMFAG00000035505	HK2	-0.29862	0.00893433	Proinflammatory		protein_coding	hexokinase 2
ENSMFAG00000035657		-0.382045	0.00893433			protein_coding	acetyl-CoA acetyltransferase 2
ENSMFAG00000035674	RAB8A	-0.212935	0.00893433			protein_coding	RAB8A, member RAS oncogene family
ENSMFAG00000035766	DUSP10	0.543343	0.00893433	Proinflammatory		protein_coding	dual specificity phosphatase 10
ENSMFAG00000036336	SMCR8	0.375005	0.00893433			protein_coding	SMCR8-C9orf72 complex subunit
ENSMFAG00000037272		-0.244831	0.00893433			protein_coding	nuclear transcription factor Y subunit beta
ENSMFAG00000037344	ARIH1	0.357721	0.00893433			protein_coding	ariadne RBR E3 ubiquitin protein ligase 1
ENSMFAG00000038008		-0.565109	0.00893433			protein_coding
ENSMFAG00000038063		-0.498213	0.00893433			pseudogene
ENSMFAG00000038341	STYX	-0.279702	0.00893433			protein_coding	serine/threonine/tyrosine interacting protein
ENSMFAG00000038369	PPP2CB	-0.411319	0.00893433			protein_coding	protein phosphatase 2 catalytic subunit beta
ENSMFAG00000038551	FBXO48	1.08595	0.00893433			protein_coding	F-box protein 48
ENSMFAG00000038899	MED18	-0.56417	0.00893433			protein_coding	mediator complex subunit 18
ENSMFAG00000039083	KLF7	0.622357	0.00893433			protein_coding	Kruppel like factor 7
ENSMFAG00000039714	MAN1A1	-0.25264	0.00893433			protein_coding	mannosidase alpha class 1A member 1
ENSMFAG00000039968	ALS2	0.37512	0.00893433			protein_coding	alsin Rho guanine nucleotide exchange factor ALS2
ENSMFAG00000040521	ELOVL5	-0.399797	0.00893433	Proinflammatory		protein_coding	ELOVL fatty acid elongase 5
ENSMFAG00000040881	MFSD14B	-0.338836	0.00893433			protein_coding	major facilitator superfamily domain containing 14B
ENSMFAG00000040978	TMEM167A	-0.300786	0.00893433			protein_coding	transmembrane protein 167A
ENSMFAG00000041283	ZFAT	0.296817	0.00893433			protein_coding	zinc finger and AT-hook domain containing
ENSMFAG00000041302	ZNF789	0.296267	0.00893433			protein_coding	zinc finger protein 789
ENSMFAG00000041369	TAP1	-0.556272	0.00893433			protein_coding	transporter 1, ATP binding cassette subfamily B member
ENSMFAG00000041544	CCNB1	0.605615	0.00893433			protein_coding	cyclin B1
ENSMFAG00000042278	NPHP4	0.528441	0.00893433			protein_coding	nephrocystin 4
ENSMFAG00000042382	IRS2	0.543394	0.00893433	Proinflammatory		protein_coding	insulin receptor substrate 2
ENSMFAG00000042593	RBM39	0.253422	0.00893433			protein_coding	RNA binding motif protein 39
ENSMFAG00000043245	GPATCH11	-0.284533	0.00893433			protein_coding	G-patch domain containing 11
ENSMFAG00000044573	SMDT1	-0.287051	0.00893433			protein_coding	single-pass membrane protein with aspartate rich tail 1
ENSMFAG00000045082		-0.379245	0.00893433			protein_coding
ENSMFAG00000045290	GOLT1B	-0.327436	0.00893433			protein_coding	golgi transport 1B
ENSMFAG00000045296	TDP2	-0.41524	0.00893433			protein_coding	tyrosyl-DNA phosphodiesterase 2
ENSMFAG00000001007	PANK4	0.329121	0.0091321			protein_coding	pantothenate kinase 4
ENSMFAG00000041558	RRP12	0.443008	0.0091321			protein_coding	ribosomal RNA processing 12 homolog
ENSMFAG00000007048	METTL2A	-0.384608	0.0091341			protein_coding	methyltransferase like 2A
ENSMFAG00000003694	RBM3	-0.291393	0.00923503			protein_coding	RNA binding motif protein 3
ENSMFAG00000015757	RF00400	0.455258	0.00923503			snoRNA	small nucleolar RNA, H/ACA box 28
ENSMFAG00000033007	DNAL4	-0.328627	0.00923503			protein_coding	dynein axonemal light chain 4
ENSMFAG00000037534	ATP5PB	-0.300347	0.00923503			protein_coding	ATP synthase peripheral stalk-membrane subunit b
ENSMFAG00000042373	PLEKHA2	-0.26455	0.00923503			protein_coding	pleckstrin homology domain containing A2
ENSMFAG00000042769	TMX1	-0.385094	0.00923503			protein_coding	thioredoxin related transmembrane protein 1
ENSMFAG00000045429	ATP6V0E1	-0.314015	0.00923503			protein_coding	ATPase H+ transporting V0 subunit e1
ENSMFAG00000046002	ICA1L	0.666995	0.00923503			protein_coding	islet cell autoantigen 1 like
ENSMFAG00000000907	LDLRAD4	1.35969	0.00926813			protein_coding	low density lipoprotein receptor class A domain containing 4
ENSMFAG00000006172		1.28949	0.0093133			miRNA
ENSMFAG00000034276	TSPYL2	0.738017	0.0093133			protein_coding	TSPY like 2
ENSMFAG00000039722	GON7	-0.303764	0.0093133			protein_coding	GON7 subunit of KEOPS complex
ENSMFAG00000043658	TARS	-0.278011	0.0093133			protein_coding	threonyl-tRNA synthetase
ENSMFAG00000000809	BTBD1	-0.247237	0.0093539			protein_coding	BTB domain containing 1
ENSMFAG00000001205	APBB3	0.482791	0.0093539			protein_coding	amyloid beta precursor protein binding family B member 3
ENSMFAG00000002293	PAN2	0.35864	0.0093539			protein_coding	poly(A) specific ribonuclease subunit PAN2
ENSMFAG00000002717	N4BP2L1	-0.323739	0.0093539			protein_coding	NEDD4 binding protein 2 like 1
ENSMFAG00000003552		-0.332902	0.0093539			protein_coding	ecotropic viral integration site 2A
ENSMFAG00000030014	RF01268	0.261767	0.0093539			scaRNA
ENSMFAG00000030171	RNF6	-0.299212	0.0093539			protein_coding	ring finger protein 6
ENSMFAG00000031431		-0.271737	0.0093539			protein_coding
ENSMFAG00000031730	CCNK	0.506765	0.0093539			protein_coding	cyclin K
ENSMFAG00000033101	COG3	0.262245	0.0093539			protein_coding	component of oligomeric golgi complex 3
ENSMFAG00000035098		-0.2641	0.0093539			protein_coding
ENSMFAG00000038679	XPO1	-0.318198	0.0093539			protein_coding	exportin 1
ENSMFAG00000039950	PGRMC2	-0.292788	0.0093539			protein_coding	progesterone receptor membrane component 2
ENSMFAG00000040983	DCLRE1A	-0.417603	0.0093539			protein_coding	DNA cross-link repair 1A
ENSMFAG00000042034	AMFR	-0.339155	0.0093539			protein_coding	autocrine motility factor receptor
ENSMFAG00000043047	SF3A3	-0.300289	0.0093539			protein_coding	splicing factor 3a subunit 3
ENSMFAG00000041470	GNB4	-0.338654	0.00935617			protein_coding	G protein subunit beta 4
ENSMFAG00000011460	RF00019	0.727549	0.00935734			misc_RNA	Y RNA
ENSMFAG00000037683		0.653827	0.00936177			protein_coding
ENSMFAG00000000567	BRPF3	0.330098	0.00937108			protein_coding	bromodomain and PHD finger containing 3
ENSMFAG00000001041	GIMAP4	-0.910998	0.00937108			protein_coding	GTPase, IMAP family member 4
ENSMFAG00000001386	TSPYL4	0.638297	0.00937108			protein_coding	TSPY like 4
ENSMFAG00000001417	SYNJ2BP	-0.273523	0.00937108			protein_coding	synaptojanin 2 binding protein
ENSMFAG00000002026	GIMAP8	-0.579367	0.00937108			protein_coding	GTPase, IMAP family member 8
ENSMFAG00000002149	NMRK1	-0.792635	0.00937108			protein_coding	nicotinamide riboside kinase 1
ENSMFAG00000002319	PSMB2	-0.340775	0.00937108			protein_coding	proteasome subunit beta 2
ENSMFAG00000002813	ESRP2	0.80527	0.00937108			protein_coding	epithelial splicing regulatory protein 2
ENSMFAG00000003689	UBE2D2	-0.230114	0.00937108			protein_coding	ubiquitin conjugating enzyme E2 D2
ENSMFAG00000003887	TRIM21	-0.325864	0.00937108			protein_coding	tripartite motif containing 21
ENSMFAG00000005598	RF00026	1.44226	0.00937108			snRNA	U6 spliceosomal RNA
ENSMFAG00000007474	MAPRE1	-0.209443	0.00937108			protein_coding	microtubule associated protein RP/EB family member 1
ENSMFAG00000010341	RF02123	1.05699	0.00937108			misc_RNA
ENSMFAG00000013137	RF00019	1.38102	0.00937108			misc_RNA	Y RNA
ENSMFAG00000013223	RMI1	-0.581173	0.00937108			protein_coding	RecQ mediated genome instability 1
ENSMFAG00000017481	RF00015	0.819186	0.00937108			snRNA	U4 spliceosomal RNA
ENSMFAG00000021184	HNRNPF	-0.293762	0.00937108			protein_coding	heterogeneous nuclear ribonucleoprotein F
ENSMFAG00000025647		-0.375842	0.00937108			pseudogene
ENSMFAG00000028852	HSPA4	-0.230036	0.00937108			protein_coding	heat shock protein family A (Hsp70) member 4
ENSMFAG00000030141	RF00608	0.956264	0.00937108			snoRNA	small nucleolar RNA, C/D box 99
ENSMFAG00000030292	PTAFR	-0.323153	0.00937108			protein_coding	platelet activating factor receptor
ENSMFAG00000030442	UTP11	-0.355787	0.00937108			protein_coding	UTP11 small subunit processome component
ENSMFAG00000031532	C1GALT1	-0.342674	0.00937108			protein_coding	core 1 synthase, glycoprotein-N-acetylgalactosamine 3-beta-galactosyltransferase 1
ENSMFAG00000032056	ZBTB10	0.756195	0.00937108			protein_coding	zinc finger and BTB domain containing 10
ENSMFAG00000032143	SLC15A2	0.583207	0.00937108			protein_coding	solute carrier family 15 member 2
ENSMFAG00000032222	SKI	0.550244	0.00937108			protein_coding	SKI proto-oncogene
ENSMFAG00000032323	CSKMT	0.656221	0.00937108			protein_coding	citrate synthase lysine methyltransferase
ENSMFAG00000032714		-0.290823	0.00937108			protein_coding	golgi associated PDZ and coiled-coil motif containing
ENSMFAG00000033062		-0.293202	0.00937108			protein_coding	ribosomal protein L21
ENSMFAG00000033665	CHMP2B	-0.322142	0.00937108			protein_coding	charged multivesicular body protein 2B
ENSMFAG00000035653	SLC25A25	0.54627	0.00937108			protein_coding	solute carrier family 25 member 25
ENSMFAG00000036559	TIMM23	-0.203599	0.00937108			protein_coding	translocase of inner mitochondrial membrane 23
ENSMFAG00000036655	CCDC47	-0.314358	0.00937108			protein_coding	coiled-coil domain containing 47
ENSMFAG00000036751	MTAP	-0.283182	0.00937108			protein_coding	methylthioadenosine phosphorylase
ENSMFAG00000037492	DENND4B	0.322547	0.00937108			protein_coding	DENN domain containing 4B
ENSMFAG00000037636		1.09731	0.00937108			protein_coding
ENSMFAG00000038727	RAB31	-0.239412	0.00937108	Proinflammatory		protein_coding	RAB31, member RAS oncogene family
ENSMFAG00000038842	UTP6	-0.22656	0.00937108			protein_coding	UTP6 small subunit processome component
ENSMFAG00000039347	OTUD5	0.110679	0.00937108			protein_coding	OTU deubiquitinase 5
ENSMFAG00000039403	ZFC3H1	0.474563	0.00937108			protein_coding	zinc finger C3H1-type containing
ENSMFAG00000039907	KIF21B	0.360754	0.00937108	Regulatory		protein_coding	kinesin family member 21B
ENSMFAG00000039932	RAMAC	-0.257051	0.00937108			protein_coding	RNA guanine-7 methyltransferase activating subunit
ENSMFAG00000041105	HSDL1	-0.341902	0.00937108			protein_coding	hydroxysteroid dehydrogenase like 1
ENSMFAG00000041963		-0.603506	0.00937108			protein_coding
ENSMFAG00000042265	ANKRD10	0.230212	0.00937108			protein_coding	ankyrin repeat domain 10
ENSMFAG00000045288	CEP85	0.313046	0.00937108			protein_coding	centrosomal protein 85
ENSMFAG00000045332	DCTN5	-0.207155	0.00937108			protein_coding	dynactin subunit 5
ENSMFAG00000041927	ZNF653	0.291203	0.00940836			protein_coding	zinc finger protein 653
ENSMFAG00000000564	ZNF140	-0.371173	0.00943688			protein_coding	zinc finger protein 140
ENSMFAG00000002797	PPP6R2	0.260923	0.00943688			protein_coding	protein phosphatase 6 regulatory subunit 2
ENSMFAG00000006722	FAM76A	-0.191323	0.00943688			protein_coding	family with sequence similarity 76 member A
ENSMFAG00000035715		-0.390607	0.00943688			protein_coding	40S ribosomal protein S4, X isoform-like
ENSMFAG00000038508	LSM5	-0.379588	0.00943688			protein_coding	LSM5 homolog, U6 small nuclear RNA and mRNA degradation associated
ENSMFAG00000041301	NAA50	-0.221259	0.00943688			protein_coding	N(alpha)-acetyltransferase 50, NatE catalytic subunit
ENSMFAG00000044118	PRKACB	-0.375745	0.00943688			protein_coding	protein kinase cAMP-activated catalytic subunit beta
ENSMFAG00000045877		-0.33655	0.00943688			protein_coding	adenylate kinase 2
ENSMFAG00000033689	CLBA1	0.662598	0.00947223			protein_coding	clathrin binding box of aftiphilin containing 1
ENSMFAG00000000496	EMC10	-0.273497	0.00951048			protein_coding	ER membrane protein complex subunit 10
ENSMFAG00000003328	PCK2	-0.322447	0.00951048			protein_coding	phosphoenolpyruvate carboxykinase 2, mitochondrial
ENSMFAG00000016860	RF00026	0.835631	0.00951048			snRNA	U6 spliceosomal RNA
ENSMFAG00000039250	TOMM70	-0.284751	0.00951048			protein_coding	translocase of outer mitochondrial membrane 70
ENSMFAG00000039618	SLC39A3	-0.290138	0.00951048			protein_coding	solute carrier family 39 member 3
ENSMFAG00000040844	SLC18B1	-0.228803	0.00951048			protein_coding	solute carrier family 18 member B1
ENSMFAG00000033343		0.309869	0.00951803			protein_coding	chromodomain helicase DNA binding protein 2
ENSMFAG00000033995	TIMM13	-0.234286	0.00951803			protein_coding	translocase of inner mitochondrial membrane 13
ENSMFAG00000038648	IRGQ	0.588327	0.00951803			protein_coding	immunity related GTPase Q
ENSMFAG00000041615	SEC61A2	0.378272	0.00951803			protein_coding	SEC61 translocon alpha 2 subunit
ENSMFAG00000045268	NDUFA13	-0.242314	0.00951803			protein_coding	NADH:ubiquinone oxidoreductase subunit A13
ENSMFAG00000033442	PSMB4	-0.286248	0.00952224			protein_coding	proteasome subunit beta 4
ENSMFAG00000000403	GLRX5	-0.349252	0.00955689			protein_coding	glutaredoxin 5
ENSMFAG00000000491	MRPL15	-0.397882	0.00955689			protein_coding	mitochondrial ribosomal protein L15
ENSMFAG00000001157	COPS3	-0.2488	0.00955689			protein_coding	COP9 signalosome subunit 3
ENSMFAG00000001323	TRAPPC4	-0.291574	0.00955689			protein_coding	trafficking protein particle complex 4
ENSMFAG00000001669	RNF114	-0.188282	0.00955689			protein_coding	ring finger protein 114
ENSMFAG00000003072		-0.372321	0.00955689			protein_coding	cytochrome b-c1 complex subunit 2, mitochondrial-like
ENSMFAG00000003622	WHRN	0.567616	0.00955689			protein_coding	whirlin
ENSMFAG00000003634	TMEM120B	0.426922	0.00955689			protein_coding	transmembrane protein 120B
ENSMFAG00000004906		1.04663	0.00955689			miRNA
ENSMFAG00000005291		-0.311556	0.00955689			protein_coding	beta-galactosidase
ENSMFAG00000006754	RF00026	1.02114	0.00955689			snRNA	U6 spliceosomal RNA
ENSMFAG00000009215	MIR640	1.37834	0.00955689			miRNA	microRNA 640
ENSMFAG00000009513		1.34173	0.00955689			miRNA
ENSMFAG00000016730	TMEM135	0.31036	0.00955689			protein_coding	transmembrane protein 135
ENSMFAG00000020264	RF00560	1.0421	0.00955689			snoRNA
ENSMFAG00000024378	RF00015	1.4866	0.00955689			snRNA	U4 spliceosomal RNA
ENSMFAG00000030719	CLK1	0.495704	0.00955689			protein_coding	Macaca fascicularis CDC like kinase 1 (CLK1), mRNA.
ENSMFAG00000031206	MGRN1	0.27971	0.00955689			protein_coding	mahogunin ring finger 1
ENSMFAG00000032277	PSMA2	-0.367137	0.00955689			protein_coding	proteasome subunit alpha 2
ENSMFAG00000032355	SUMO3	-0.246265	0.00955689			protein_coding	small ubiquitin like modifier 3
ENSMFAG00000032398	DKC1	-0.299589	0.00955689			protein_coding	dyskerin pseudouridine synthase 1
ENSMFAG00000033061	MS4A6A	-0.500982	0.00955689	Proinflammatory		protein_coding	membrane spanning 4-domains A6A
ENSMFAG00000033478	QARS	-0.340892	0.00955689			protein_coding	glutaminyl-tRNA synthetase
ENSMFAG00000034244	B2M	-0.465232	0.00955689			protein_coding	beta-2-microglobulin
ENSMFAG00000036652	PARL	-0.239419	0.00955689			protein_coding	presenilin associated rhomboid like
ENSMFAG00000036829	PSMA1	-0.264269	0.00955689			protein_coding	proteasome subunit alpha 1
ENSMFAG00000037322	SAMM50	-0.27049	0.00955689			protein_coding	SAMM50 sorting and assembly machinery component
ENSMFAG00000037520	BRD2	0.367586	0.00955689			protein_coding	bromodomain containing 2
ENSMFAG00000037621	GABARAPL1	0.322704	0.00955689			protein_coding	GABA type A receptor associated protein like 1
ENSMFAG00000037723	AKT1S1	0.189188	0.00955689			protein_coding	AKT1 substrate 1
ENSMFAG00000037826	EBNA1BP2	-0.338359	0.00955689			protein_coding	EBNA1 binding protein 2
ENSMFAG00000037885	TMPO	-0.324029	0.00955689	Regulatory		protein_coding	thymopoietin
ENSMFAG00000037919	MAP2K3	0.526571	0.00955689			protein_coding	mitogen-activated protein kinase kinase 3
ENSMFAG00000038650	PLAU	1.33454	0.00955689			protein_coding	plasminogen activator, urokinase
ENSMFAG00000038788		-0.342912	0.00955689			protein_coding	proteasome 26S subunit, non-ATPase 10
ENSMFAG00000039070	SDHB	-0.256565	0.00955689			protein_coding	succinate dehydrogenase complex iron sulfur subunit B
ENSMFAG00000041669	PIKFYVE	0.285686	0.00955689			protein_coding	phosphoinositide kinase, FYVE-type zinc finger containing
ENSMFAG00000042871	PRDM15	0.291664	0.00955689			protein_coding	PR/SET domain 15
ENSMFAG00000044736	KLHL21	0.513761	0.00955689			protein_coding	kelch like family member 21
ENSMFAG00000044738	NKAPD1	-0.325035	0.00955689			protein_coding	NKAP domain containing 1
ENSMFAG00000045979	TTC21A	0.622257	0.00955689			protein_coding	tetratricopeptide repeat domain 21A
ENSMFAG00000045981	FBXW7	0.255103	0.00955689			protein_coding	F-box and WD repeat domain containing 7
ENSMFAG00000046038	FHOD1	0.295148	0.00955689			protein_coding	formin homology 2 domain containing 1
ENSMFAG00000046208	SLC25A46	-0.337339	0.00955689			protein_coding	solute carrier family 25 member 46
ENSMFAG00000046288	PUSL1	0.36035	0.00955689			protein_coding	pseudouridine synthase like 1
ENSMFAG00000042301	CDK12	0.315138	0.00959649			protein_coding	cyclin dependent kinase 12
ENSMFAG00000030085		-0.28484	0.00959755			protein_coding
ENSMFAG00000037139		-0.415017	0.00959755			protein_coding	transporter 2, ATP binding cassette subfamily B member
ENSMFAG00000042385	OTUD6B	-0.315761	0.00959755			protein_coding	OTU domain containing 6B
ENSMFAG00000002504	ARAP3	0.51584	0.00963591			protein_coding	ArfGAP with RhoGAP domain, ankyrin repeat and PH domain 3
ENSMFAG00000001167	GNL1	0.279109	0.00964899			protein_coding	G protein nucleolar 1 (putative)
ENSMFAG00000009073	RF00001	0.930826	0.00964899			rRNA	5S ribosomal RNA
ENSMFAG00000013719		0.766143	0.00964899			protein_coding
ENSMFAG00000042156	CHTF8	-0.304749	0.00964899			protein_coding	chromosome transmission fidelity factor 8
ENSMFAG00000041017	RBMX2	-0.246963	0.00967484			protein_coding	RNA binding motif protein X-linked 2
ENSMFAG00000003201	KHDC4	0.190866	0.00972613			protein_coding	KH domain containing 4, pre-mRNA splicing factor
ENSMFAG00000000727	ASB13	-0.529124	0.00978198			protein_coding	ankyrin repeat and SOCS box containing 13
ENSMFAG00000041856		-0.341009	0.00979625			pseudogene
ENSMFAG00000002641	SRP9	-0.416098	0.00980321			protein_coding	signal recognition particle 9
ENSMFAG00000036407	TASP1	0.438865	0.00980321			protein_coding	taspase 1
ENSMFAG00000036199	GMFB	-0.329483	0.00987977			protein_coding	glia maturation factor beta
ENSMFAG00000000244		-0.29155	0.00990431			protein_coding	transmembrane protein 219
ENSMFAG00000000908	DERA	-0.400847	0.00990431			protein_coding	deoxyribose-phosphate aldolase
ENSMFAG00000013235	RF00017	0.766299	0.00990431			misc_RNA	Metazoan signal recognition particle RNA
ENSMFAG00000031642	RFX1	0.408104	0.00990431			protein_coding	regulatory factor X1
ENSMFAG00000037569	EXD3	0.600385	0.00990431			protein_coding	exonuclease 3'-5' domain containing 3
ENSMFAG00000003393	TMEM222	-0.270465	0.00990531			protein_coding	transmembrane protein 222
ENSMFAG00000025369	POMP	-0.332582	0.00990531			protein_coding	proteasome maturation protein
ENSMFAG00000030624	PDP1	-0.32061	0.00990531			protein_coding	pyruvate dehyrogenase phosphatase catalytic subunit 1
ENSMFAG00000033682		-0.315024	0.00990531			protein_coding	THAP domain containing 12
ENSMFAG00000034432	CYB5B	-0.305322	0.00990531			protein_coding	cytochrome b5 type B
ENSMFAG00000039556		0.573607	0.00990531			protein_coding
ENSMFAG00000043226	KTN1	-0.219031	0.00990531			protein_coding	kinectin 1
ENSMFAG00000037545	ATG16L1	0.267316	0.00990885			protein_coding	autophagy related 16 like 1
ENSMFAG00000039939	PLA2G2F	1.42441	0.00992006			protein_coding	phospholipase A2 group IIF
ENSMFAG00000000409		-0.238104	0.00994118			protein_coding	NADH:ubiquinone oxidoreductase subunit B11
ENSMFAG00000039659	FN3KRP	-0.390998	0.00994769			protein_coding	fructosamine 3 kinase related protein
ENSMFAG00000000826		-0.485435	0.00997782			protein_coding
ENSMFAG00000000417	RPF2	-0.517339	0.0100076			protein_coding	ribosome production factor 2 homolog
ENSMFAG00000001557	PPP1R8	-0.242154	0.0100076			protein_coding	protein phosphatase 1 regulatory subunit 8
ENSMFAG00000013031		1.08261	0.0100076			protein_coding
ENSMFAG00000034066	LBR	-0.304479	0.0100076	Proinflammatory		protein_coding	lamin B receptor
ENSMFAG00000035698		0.600016	0.0100076			pseudogene
ENSMFAG00000046416	ND2	0.576889	0.0100076			protein_coding	NADH dehydrogenase subunit 2
ENSMFAG00000039743	PRELID3B	-0.300016	0.0100402			protein_coding	PRELI domain containing 3B
ENSMFAG00000034142	HEXA	-0.289441	0.0100404			protein_coding	hexosaminidase subunit alpha
ENSMFAG00000028262	LMBRD1	-0.248997	0.0100462			protein_coding	LMBR1 domain containing 1
ENSMFAG00000038857	PSMD7	-0.202255	0.0100462			protein_coding	proteasome 26S subunit, non-ATPase 7
ENSMFAG00000042750		0.559296	0.0100462			protein_coding
ENSMFAG00000028188		-0.267358	0.0100585			protein_coding
ENSMFAG00000037805	RAB2A	-0.167321	0.0100585			protein_coding	RAB2A, member RAS oncogene family
ENSMFAG00000039262	RNF14	-0.330999	0.0100585			protein_coding	ring finger protein 14
ENSMFAG00000035648		-0.535324	0.0100854			protein_coding
ENSMFAG00000021219	RF00570	1.14354	0.0101011			snoRNA	small nucleolar RNA, C/D box 64
ENSMFAG00000030007	ZNF770	-0.39735	0.0101011	Proinflammatory		protein_coding	zinc finger protein 770
ENSMFAG00000034149	PTDSS1	-0.351309	0.0101011			protein_coding	phosphatidylserine synthase 1
ENSMFAG00000036623	ACSL4	-0.348121	0.0101562	Proinflammatory		protein_coding	acyl-CoA synthetase long chain family member 4
ENSMFAG00000008281	MED23	0.239961	0.0101859			protein_coding	mediator complex subunit 23
ENSMFAG00000032262	SLC3A2	0.271616	0.0101859			protein_coding	solute carrier family 3 member 2
ENSMFAG00000036668	SPSB1	-0.41013	0.0101859			protein_coding	splA/ryanodine receptor domain and SOCS box containing 1
ENSMFAG00000037675	GSPT1	-0.302377	0.0101859			protein_coding	G1 to S phase transition 1
ENSMFAG00000040152	RBX1	-0.348487	0.0101859			protein_coding	ring-box 1
ENSMFAG00000002255	LY96	-0.299768	0.0102201			protein_coding	lymphocyte antigen 96
ENSMFAG00000032780	VTA1	-0.279141	0.0102201			protein_coding	vesicle trafficking 1
ENSMFAG00000037577		0.482621	0.0102201			protein_coding
ENSMFAG00000044858		-0.277983	0.0102201			protein_coding	TMEM9 domain family member B
ENSMFAG00000000848	RLN3	1.41781	0.0102478			protein_coding	relaxin 3
ENSMFAG00000001123		-0.497782	0.0102478			protein_coding
ENSMFAG00000001803	OGT	0.427313	0.0102478	Proinflammatory		protein_coding	O-linked N-acetylglucosamine (GlcNAc) transferase
ENSMFAG00000003797	LRBA	0.375847	0.0102478			protein_coding	LPS responsive beige-like anchor protein
ENSMFAG00000017789	GPR22	0.647528	0.0102478			protein_coding	G protein-coupled receptor 22
ENSMFAG00000023107	RIN3	0.28707	0.0102478			protein_coding	Ras and Rab interactor 3
ENSMFAG00000028750	UFSP1	-0.714092	0.0102478			protein_coding	UFM1 specific peptidase 1 (inactive)
ENSMFAG00000032949	TPD52L2	-0.185861	0.0102478			protein_coding	TPD52 like 2
ENSMFAG00000033429	ZMYND8	0.338704	0.0102478			protein_coding	zinc finger MYND-type containing 8
ENSMFAG00000039706	SAFB2	0.269914	0.0102478			protein_coding	scaffold attachment factor B2
ENSMFAG00000045780	CDAN1	0.320797	0.0102478			protein_coding	codanin 1
ENSMFAG00000046363	CCDC88C	0.432123	0.0102478			protein_coding	coiled-coil domain containing 88C
ENSMFAG00000040611	TIPARP	0.402517	0.0102553			protein_coding	TCDD inducible poly(ADP-ribose) polymerase
ENSMFAG00000004035	EPAS1	1.01164	0.0102603			protein_coding	endothelial PAS domain protein 1
ENSMFAG00000020932		-0.315216	0.0102603			protein_coding
ENSMFAG00000042096	SYPL1	-0.325171	0.0102603			protein_coding	synaptophysin like 1
ENSMFAG00000044705	HTATSF1	-0.285205	0.010311			protein_coding	HIV-1 Tat specific factor 1
ENSMFAG00000041368	RNF146	-0.242667	0.0103316			protein_coding	ring finger protein 146
ENSMFAG00000000553	UEVLD	-0.245649	0.0103327			protein_coding	UEV and lactate/malate dehyrogenase domains
ENSMFAG00000045922	BCL9L	0.402008	0.0103886	Proinflammatory		protein_coding	BCL9 like
ENSMFAG00000000057		0.708832	0.0103907			protein_coding
ENSMFAG00000042018	RABEPK	0.641188	0.0103907			protein_coding	Rab9 effector protein with kelch motifs
ENSMFAG00000043583	CD99L2	-0.270651	0.0103907			protein_coding	CD99 molecule like 2
ENSMFAG00000031271	PGK1	-0.434449	0.0103927			protein_coding	phosphoglycerate kinase 1
ENSMFAG00000032607	TXNDC9	-0.346003	0.0103927			protein_coding	thioredoxin domain containing 9
ENSMFAG00000040545	MGST3	-0.40913	0.0103927			protein_coding	microsomal glutathione S-transferase 3
ENSMFAG00000006345		-0.289519	0.0104198			protein_coding
ENSMFAG00000044727		0.704861	0.0104198			protein_coding
ENSMFAG00000043141	APTX	-0.234412	0.0104283			protein_coding	aprataxin
ENSMFAG00000046250	PPIL1	-0.448367	0.0104283			protein_coding	peptidylprolyl isomerase like 1
ENSMFAG00000036774	PSMC6	-0.217907	0.0104416			protein_coding	proteasome 26S subunit, ATPase 6
ENSMFAG00000042529	UAP1	0.281632	0.0104416			protein_coding	UDP-N-acetylglucosamine pyrophosphorylase 1
ENSMFAG00000007440	CABYR	0.887833	0.0104748			protein_coding	calcium binding tyrosine phosphorylation regulated
ENSMFAG00000028136	HMGN4	-0.290895	0.0104748			protein_coding	high mobility group nucleosomal binding domain 4
ENSMFAG00000030752	COPB2	-0.342704	0.0104748			protein_coding	coatomer protein complex subunit beta 2
ENSMFAG00000032995	GTF2H1	-0.237448	0.0104748			protein_coding	general transcription factor IIH subunit 1
ENSMFAG00000033674	POLR2G	-0.377941	0.0104748			protein_coding	RNA polymerase II subunit G
ENSMFAG00000034289	TNFRSF6B	0.596272	0.0104748			protein_coding	TNF receptor superfamily member 6b
ENSMFAG00000035916		1.00239	0.0104748			protein_coding
ENSMFAG00000036716	RGS1	1.52206	0.0104748			protein_coding	regulator of G protein signaling 1
ENSMFAG00000044503	NAT1	-0.471685	0.0104748			protein_coding	N-acetyltransferase 1
ENSMFAG00000046029		0.420029	0.0104748			protein_coding
ENSMFAG00000001917	FCN1	-1.89021	0.0104843			protein_coding	ficolin-2
ENSMFAG00000043792	MEGF8	0.44132	0.0104843			protein_coding	multiple EGF like domains 8
ENSMFAG00000026553	LAMP2	-0.324689	0.0105262	Proinflammatory		protein_coding	lysosomal associated membrane protein 2
ENSMFAG00000038360	PSMB3	-0.283893	0.0105307			protein_coding	proteasome subunit beta 3
ENSMFAG00000042357	ANXA1	-0.27802	0.0105307	Proinflammatory		protein_coding	annexin A1
ENSMFAG00000000470	CAB39	-0.277406	0.0105323			protein_coding	calcium binding protein 39
ENSMFAG00000002690		-0.318698	0.0105323			protein_coding
ENSMFAG00000006541	CPEB2	0.415414	0.0105323			protein_coding	cytoplasmic polyadenylation element binding protein 2
ENSMFAG00000016632	RF00019	1.11104	0.0105323			misc_RNA	Y RNA
ENSMFAG00000032034	DECR1	-0.313718	0.0105323			protein_coding	2,4-dienoyl-CoA reductase 1
ENSMFAG00000036808	AKR1A1	-0.335643	0.0105323			protein_coding	aldo-keto reductase family 1 member A1
ENSMFAG00000037281	ATP6V1G1	-0.254309	0.0105323			protein_coding	ATPase H+ transporting V1 subunit G1
ENSMFAG00000039529	GNAT2	0.472317	0.0105323			protein_coding	G protein subunit alpha transducin 2
ENSMFAG00000039747	PSMD11	-0.17418	0.0105323			protein_coding	proteasome 26S subunit, non-ATPase 11
ENSMFAG00000041022	COPB1	-0.231741	0.0105323			protein_coding	coatomer protein complex subunit beta 1
ENSMFAG00000044216	UBR5	0.320118	0.0105323			protein_coding	ubiquitin protein ligase E3 component n-recognin 5
ENSMFAG00000040075	FOCAD	0.379899	0.0105504			protein_coding	focadhesin
ENSMFAG00000037085	FBXO7	-0.297477	0.0105535			protein_coding	F-box protein 7
ENSMFAG00000037555	KIAA2013	-0.185852	0.0105535			protein_coding	KIAA2013
ENSMFAG00000001553	YIPF5	-0.338424	0.0105779			protein_coding	Yip1 domain family member 5
ENSMFAG00000002459	SCO1	-0.308454	0.0105779			protein_coding	SCO cytochrome c oxidase assembly protein 1
ENSMFAG00000003925	DAPP1	-0.316412	0.0105779			protein_coding	dual adaptor of phosphotyrosine and 3-phosphoinositides 1
ENSMFAG00000033277	GIN1	-0.392169	0.0105779			protein_coding	gypsy retrotransposon integrase 1
ENSMFAG00000034052	AGPAT5	-0.411561	0.0105779			protein_coding	1-acylglycerol-3-phosphate O-acyltransferase 5
ENSMFAG00000039034	PCIF1	0.259777	0.0105779			protein_coding	PDX1 C-terminal inhibiting factor 1
ENSMFAG00000045090	MSMO1	-0.497811	0.0105779			protein_coding	methylsterol monooxygenase 1
ENSMFAG00000001479	C10orf55	1.45892	0.0105975			protein_coding	chromosome 10 open reading frame 55
ENSMFAG00000009314	RF00017	0.470271	0.0105975			misc_RNA	Metazoan signal recognition particle RNA
ENSMFAG00000013243	RF00019	1.01735	0.0105975			misc_RNA	Y RNA
ENSMFAG00000029400	ASXL1	0.283578	0.0105975			protein_coding	ASXL transcriptional regulator 1
ENSMFAG00000030564	AAR2	-0.169982	0.0105975			protein_coding	AAR2 splicing factor
ENSMFAG00000030931	LRRC18	0.701244	0.0105975			protein_coding	leucine rich repeat containing 18
ENSMFAG00000034541	TMEM165	-0.292995	0.0105975			protein_coding	transmembrane protein 165
ENSMFAG00000035612		-0.476442	0.0105975			protein_coding
ENSMFAG00000036334	ATP6V1D	-0.254573	0.0105975			protein_coding	ATPase H+ transporting V1 subunit D
ENSMFAG00000038822		-0.296705	0.0105975			protein_coding	RAB4A, member RAS oncogene family
ENSMFAG00000040764		-0.32349	0.0105975			pseudogene	60S ribosomal protein L10-like
ENSMFAG00000041164		1.207	0.0105975			protein_coding
ENSMFAG00000041175		0.61768	0.0105975			protein_coding
ENSMFAG00000041449	ATXN7L2	0.331705	0.0105975			protein_coding	ataxin 7 like 2
ENSMFAG00000044089	EEPD1	0.6378	0.0105975	Proinflammatory		protein_coding	endonuclease/exonuclease/phosphatase family domain containing 1
ENSMFAG00000044330	CLEC4E	1.3282	0.0105975	Proinflammatory		protein_coding	C-type lectin domain family 4 member E
ENSMFAG00000045323	YEATS2	0.294899	0.0105975			protein_coding	YEATS domain containing 2
ENSMFAG00000045904		-0.473179	0.0105975			protein_coding	prostaglandin reductase 2
ENSMFAG00000040176	LATS1	-0.202094	0.0106394			protein_coding	large tumor suppressor kinase 1
ENSMFAG00000041675	TCEA1	-0.269772	0.0106485			protein_coding	transcription elongation factor A1
ENSMFAG00000000278	RABEP2	0.287066	0.0106774			protein_coding	rabaptin, RAB GTPase binding effector protein 2
ENSMFAG00000000626	TXNDC15	-0.313813	0.0106774			protein_coding	thioredoxin domain containing 15
ENSMFAG00000022423	RF01880	0.705597	0.0106774			misc_RNA
ENSMFAG00000028496	GEM	1.70096	0.0106774			protein_coding	GTP binding protein overexpressed in skeletal muscle
ENSMFAG00000031996		-0.211731	0.0106774			protein_coding
ENSMFAG00000032136	ATG101	-0.259053	0.0106774			protein_coding	autophagy related 101
ENSMFAG00000035998	COL5A1	-1.17256	0.0106774			protein_coding	collagen type V alpha 1 chain
ENSMFAG00000031357	QRICH2	1.2004	0.0106781			protein_coding	glutamine rich 2
ENSMFAG00000044097	ACTR2	-0.381286	0.0106781			protein_coding	actin related protein 2
ENSMFAG00000040242		0.659096	0.010679			protein_coding	uncharacterized LOC101925844
ENSMFAG00000001385	JKAMP	-0.389753	0.010757			protein_coding	JNK1/MAPK8 associated membrane protein
ENSMFAG00000000154	SGSM2	0.466841	0.0107677			protein_coding	small G protein signaling modulator 2
ENSMFAG00000000500	LAP3	-0.521762	0.0107677			protein_coding	leucine aminopeptidase 3
ENSMFAG00000001460	TNFSF4	0.379493	0.0107677			protein_coding	TNF superfamily member 4
ENSMFAG00000001943	ZCCHC9	-0.361453	0.0107677			protein_coding	zinc finger CCHC-type containing 9
ENSMFAG00000002326	RAB5A	-0.168273	0.0107677			protein_coding	RAB5A, member RAS oncogene family
ENSMFAG00000002659	ARL2BP	-0.279117	0.0107677			protein_coding	ADP ribosylation factor like GTPase 2 binding protein
ENSMFAG00000002684	KLF12	0.454293	0.0107677			protein_coding	Kruppel like factor 12
ENSMFAG00000004010	PHYKPL	0.323127	0.0107677			protein_coding	5-phosphohydroxy-L-lysine phospho-lyase
ENSMFAG00000012750	RF00406	0.519596	0.0107677			snoRNA	small nucleolar RNA, H/ACA box 80B
ENSMFAG00000013125	RF00619	0.680737	0.0107677			snRNA
ENSMFAG00000013929	MIR3184	1.12177	0.0107677			miRNA	microRNA 3184
ENSMFAG00000014685		1.09954	0.0107677			miRNA
ENSMFAG00000015046		0.869805	0.0107677			protein_coding
ENSMFAG00000018523	MIR212	1.11905	0.0107677			miRNA	microRNA 212
ENSMFAG00000026839		-0.477655	0.0107677			protein_coding
ENSMFAG00000028633	RIDA	-0.478765	0.0107677			protein_coding	reactive intermediate imine deaminase A homolog
ENSMFAG00000030055	WDR77	-0.291317	0.0107677			protein_coding	WD repeat domain 77
ENSMFAG00000030070	DCAF15	0.190259	0.0107677			protein_coding	DDB1 and CUL4 associated factor 15
ENSMFAG00000030905	HMGB1	-0.2078	0.0107677			protein_coding	high mobility group box 1
ENSMFAG00000031334	ALKBH3	-0.307144	0.0107677			protein_coding	alkB homolog 3, alpha-ketoglutaratedependent dioxygenase
ENSMFAG00000032128	TSPOAP1	0.498226	0.0107677			protein_coding	TSPO associated protein 1
ENSMFAG00000032275	ZNF467	0.369961	0.0107677	Proinflammatory		protein_coding	zinc finger protein 467
ENSMFAG00000032289	LPCAT2	-0.360577	0.0107677			protein_coding	lysophosphatidylcholine acyltransferase 2
ENSMFAG00000032408		0.446335	0.0107677			protein_coding
ENSMFAG00000032448	PMVK	-0.253908	0.0107677			protein_coding	phosphomevalonate kinase
ENSMFAG00000032575		1.25691	0.0107677			protein_coding	leucine, glutamate and lysine rich 1
ENSMFAG00000032663	PPP3CB	-0.198614	0.0107677			protein_coding	protein phosphatase 3 catalytic subunit beta
ENSMFAG00000032863	RELT	0.344813	0.0107677			protein_coding	RELT TNF receptor
ENSMFAG00000033127	CDK17	0.239784	0.0107677			protein_coding	cyclin dependent kinase 17
ENSMFAG00000033322		-0.422248	0.0107677			pseudogene	40S ribosomal protein S8
ENSMFAG00000033601	PIGK	-0.347792	0.0107677			protein_coding	phosphatidylinositol glycan anchor biosynthesis class K
ENSMFAG00000033628	SNRPD3	-0.311564	0.0107677			protein_coding	small nuclear ribonucleoprotein D3 polypeptide
ENSMFAG00000033735	GIGYF1	0.30163	0.0107677			protein_coding	GRB10 interacting GYF protein 1
ENSMFAG00000033742		0.615514	0.0107677			protein_coding	LON peptidase N-terminal domain and ring finger 1
ENSMFAG00000034144		-0.476146	0.0107677			protein_coding	mitochondrial transcription rescue factor 1
ENSMFAG00000034182	TAX1BP1	-0.189359	0.0107677			protein_coding	Tax1 binding protein 1
ENSMFAG00000034202	RAP1A	-0.35288	0.0107677			protein_coding	RAP1A, member of RAS oncogene family
ENSMFAG00000034477		-0.29013	0.0107677			protein_coding	cytochrome c oxidase subunit 4 isoform 1, mitochondrial-like
ENSMFAG00000034518	SPG21	-0.356818	0.0107677			protein_coding	SPG21 abhydrolase domain containing, maspardin
ENSMFAG00000034586	PEX6	0.283189	0.0107677			protein_coding	peroxisomal biogenesis factor 6
ENSMFAG00000035174		0.492077	0.0107677			protein_coding	syntaxin-4-like
ENSMFAG00000035692	ZNF224	0.269196	0.0107677			protein_coding	zinc finger protein 224
ENSMFAG00000036635	SERBP1	-0.282089	0.0107677			protein_coding	SERPINE1 mRNA binding protein 1
ENSMFAG00000036758	SRP68	-0.19279	0.0107677			protein_coding	signal recognition particle 68
ENSMFAG00000037030	ANKRD52	0.499736	0.0107677			protein_coding	ankyrin repeat domain 52
ENSMFAG00000037543	BAMBI	0.862867	0.0107677			protein_coding	BMP and activin membrane bound inhibitor
ENSMFAG00000037568	MESD	-0.284994	0.0107677			protein_coding	mesoderm development LRP chaperone
ENSMFAG00000037770	GNAI3	-0.212936	0.0107677			protein_coding	G protein subunit alpha i3
ENSMFAG00000037786	COPS5	-0.270914	0.0107677			protein_coding	COP9 signalosome subunit 5
ENSMFAG00000037792	SIPA1L3	0.33324	0.0107677			protein_coding	signal induced proliferation associated 1 like 3
ENSMFAG00000037978	ZFAND5	0.293264	0.0107677	Regulatory		protein_coding	zinc finger AN1-type containing 5
ENSMFAG00000038342	SPTSSA	-0.392745	0.0107677			protein_coding	serine palmitoyltransferase small subunit A
ENSMFAG00000039033	GNL2	-0.267477	0.0107677			protein_coding	G protein nucleolar 2
ENSMFAG00000039117	SMS	-0.270521	0.0107677			protein_coding	spermine synthase
ENSMFAG00000039293	XRCC5	-0.260741	0.0107677			protein_coding	X-ray repair cross complementing 5
ENSMFAG00000039818	NAA25	0.252185	0.0107677			protein_coding	N(alpha)-acetyltransferase 25, NatB auxiliary subunit
ENSMFAG00000039823	SREK1	0.294555	0.0107677			protein_coding	splicing regulatory glutamic acid and lysine rich protein 1
ENSMFAG00000039986		-0.448214	0.0107677			protein_coding
ENSMFAG00000040602	KLF6	0.492264	0.0107677			protein_coding	Kruppel like factor 6
ENSMFAG00000040803	PSMB5	-0.337597	0.0107677			protein_coding	proteasome subunit beta 5
ENSMFAG00000040955		-0.289434	0.0107677			pseudogene
ENSMFAG00000041051	ZNF300	0.352981	0.0107677			protein_coding	zinc finger protein 300
ENSMFAG00000041084	SLC31A1	-0.328317	0.0107677			protein_coding	solute carrier family 31 member 1
ENSMFAG00000041090	USP39	-0.248516	0.0107677			protein_coding	ubiquitin specific peptidase 39
ENSMFAG00000041785	GIMAP2	-0.424014	0.0107677			protein_coding	GTPase, IMAP family member 2
ENSMFAG00000041988	MBP	0.301766	0.0107677			protein_coding	myelin basic protein
ENSMFAG00000042360	WDR92	-0.321769	0.0107677			protein_coding	WD repeat domain 92
ENSMFAG00000042618	TMEM208	-0.239223	0.0107677			protein_coding	transmembrane protein 208
ENSMFAG00000042986	MAN2B1	-0.218424	0.0107677			protein_coding	Macaca fascicularis mannosidase alpha class 2B member 1 (MAN2B1), mRNA.
ENSMFAG00000043548	AVPI1	0.634117	0.0107677			protein_coding	arginine vasopressin induced 1
ENSMFAG00000044822	AIMP1	-0.36057	0.0107677			protein_coding	aminoacyl tRNA synthetase complex interacting multifunctional protein 1
ENSMFAG00000044961		0.460038	0.0107677			protein_coding
ENSMFAG00000045202	ATF7IP	0.198554	0.0107677			protein_coding	activating transcription factor 7 interacting protein
ENSMFAG00000045281	RASGRP3	0.428871	0.0107677			protein_coding	RAS guanyl releasing protein 3
ENSMFAG00000045493	ABHD16B	0.571866	0.0107677			protein_coding	abhydrolase domain containing 16B
ENSMFAG00000045651	RAB24	0.188342	0.0107677			protein_coding	RAB24, member RAS oncogene family
ENSMFAG00000045912	CNDP2	-0.368426	0.0107677			protein_coding	carnosine dipeptidase 2
ENSMFAG00000046032	RPS16	-0.282594	0.0107677			protein_coding	ribosomal protein S16
ENSMFAG00000046146	MRPS34	-0.241726	0.0107677			protein_coding	mitochondrial ribosomal protein S34
ENSMFAG00000040507	KAT2A	0.36293	0.0107727			protein_coding	lysine acetyltransferase 2A
ENSMFAG00000002456	ZDHHC4	-0.330414	0.0107879			protein_coding	zinc finger DHHC-type containing 4
ENSMFAG00000003172	MRPL48	-0.400614	0.0107879			protein_coding	mitochondrial ribosomal protein L48
ENSMFAG00000003364	AP3S1	-0.329936	0.0107879			protein_coding	adaptor related protein complex 3 subunit sigma 1
ENSMFAG00000003478		-0.271188	0.0107879			protein_coding	translocase of outer mitochondrial membrane 20
ENSMFAG00000010438	RF00019	1.31535	0.0107879			misc_RNA	Y RNA
ENSMFAG00000030245	ZNF787	0.25101	0.0107879			protein_coding	zinc finger protein 787
ENSMFAG00000032651	GOLGA7	-0.256733	0.0107879			protein_coding	golgin A7
ENSMFAG00000035492	BAD	0.159412	0.0107879			protein_coding	BCL2 associated agonist of cell death
ENSMFAG00000038245	C1QBP	-0.435095	0.0107879			protein_coding	complement C1q binding protein
ENSMFAG00000038733	ARHGAP4	0.288582	0.0107879			protein_coding	Rho GTPase activating protein 4
ENSMFAG00000039378	PYGM	0.60192	0.0107879			protein_coding	glycogen phosphorylase, muscle associated
ENSMFAG00000039865		-0.149135	0.0107879			protein_coding	major facilitator superfamily domain containing 14A
ENSMFAG00000040586	MED20	-0.25585	0.0107879			protein_coding	mediator complex subunit 20
ENSMFAG00000040631	FARP1	0.499533	0.0107879			protein_coding	FERM, ARH/RhoGEF and pleckstrin domain protein 1
ENSMFAG00000043414	DNAJB12	0.0974801	0.0107879			protein_coding	DnaJ heat shock protein family (Hsp40) member B12
ENSMFAG00000043654	PSMA6	-0.344995	0.0107879			protein_coding	proteasome subunit alpha 6
ENSMFAG00000043948	ZFAND1	-0.41801	0.0107879			protein_coding	zinc finger AN1-type containing 1
ENSMFAG00000002743	SZT2	0.441032	0.0108195			protein_coding	SZT2 subunit of KICSTOR complex
ENSMFAG00000043321	FBXL5	-0.319555	0.0108195	Proinflammatory		protein_coding	F-box and leucine rich repeat protein 5
ENSMFAG00000032641	AAK1	0.378641	0.0108269			protein_coding	AP2 associated kinase 1
ENSMFAG00000044065	AKAP7	-0.220684	0.0108594			protein_coding	A-kinase anchoring protein 7
ENSMFAG00000045478	DYNLL2	-0.202252	0.0108594			protein_coding	dynein light chain LC8-type 2
ENSMFAG00000033999		-0.592211	0.0108699			protein_coding	lymphocyte antigen 75
ENSMFAG00000037930	NFKBIE	0.539469	0.0108699			protein_coding	NFKB inhibitor epsilon
ENSMFAG00000038773	TM7SF2	0.467857	0.0108699			protein_coding	transmembrane 7 superfamily member 2
ENSMFAG00000039915	METAP2	-0.251499	0.0108699			protein_coding	methionyl aminopeptidase 2
ENSMFAG00000044563	MRPS12	-0.351222	0.0108699			protein_coding	mitochondrial ribosomal protein S12
ENSMFAG00000000737	MKRN1	-0.172084	0.0109752			protein_coding	makorin ring finger protein 1
ENSMFAG00000002539	GTF2E1	-0.410828	0.0109752			protein_coding	general transcription factor IIE subunit 1
ENSMFAG00000003213	TPST1	0.434346	0.0109752	Proinflammatory		protein_coding	tyrosylprotein sulfotransferase 1
ENSMFAG00000032390	DOCK7	0.376112	0.0109752			protein_coding	dedicator of cytokinesis 7
ENSMFAG00000034101	MAP3K14	0.258982	0.0109752			protein_coding	mitogen-activated protein kinase kinase kinase 14
ENSMFAG00000035951		-0.291847	0.0109752			protein_coding	general transcription factor IIH subunit 3
ENSMFAG00000037908	CNOT7	-0.28653	0.0109752			protein_coding	CCR4-NOT transcription complex subunit 7
ENSMFAG00000041198	FAM8A1	-0.312812	0.0109752	Proinflammatory		protein_coding	family with sequence similarity 8 member A1
ENSMFAG00000042173	DXO	0.228596	0.0109752			protein_coding	decapping exoribonuclease
ENSMFAG00000042846	HERC1	0.404691	0.0109752	Regulatory		protein_coding	HECT and RLD domain containing E3 ubiquitin protein ligase family member 1
ENSMFAG00000042993	PDCD6	-0.222025	0.0109752			protein_coding	programmed cell death 6
ENSMFAG00000043943	TNRC6C	0.249778	0.0109752			protein_coding	trinucleotide repeat containing adaptor 6C
ENSMFAG00000044315	GGA1	0.251449	0.0109752			protein_coding	golgi associated, gamma adaptin ear containing, ARF binding protein 1
ENSMFAG00000044935		-0.512357	0.0109752			protein_coding
ENSMFAG00000036992	MYL12A	-0.304437	0.010985			protein_coding	myosin light chain 12A
ENSMFAG00000038322	NDUFAB1	-0.346435	0.010985			protein_coding	NADH:ubiquinone oxidoreductase subunit AB1
ENSMFAG00000039266	VEZT	-0.283539	0.010985			protein_coding	vezatin, adherens junctions transmembrane protein
ENSMFAG00000043118	NUDCD1	-0.333381	0.010985			protein_coding	NudC domain containing 1
ENSMFAG00000043362	SLC52A1	-0.549093	0.010985			protein_coding	solute carrier family 52 member 1
ENSMFAG00000044882	NCK1	-0.246807	0.010985			protein_coding	NCK adaptor protein 1
ENSMFAG00000041170	TANGO6	0.390682	0.0110068			protein_coding	transport and golgi organization 6 homolog
ENSMFAG00000041830	TCOF1	0.41482	0.0110068			protein_coding	treacle ribosome biogenesis factor 1
ENSMFAG00000034410	SRP14	-0.191397	0.011027			protein_coding	signal recognition particle 14
ENSMFAG00000041809	MRPL14	-0.311645	0.011027			protein_coding	mitochondrial ribosomal protein L14
ENSMFAG00000003191	PI4K2A	0.32993	0.011028			protein_coding	phosphatidylinositol 4-kinase type 2 alpha
ENSMFAG00000029999	SNX2	-0.21412	0.011028			protein_coding	sorting nexin 2
ENSMFAG00000031457	ADD3	-0.369836	0.011028			protein_coding	adducin 3
ENSMFAG00000033928		0.351217	0.011028			protein_coding	tubulin tyrosine ligase like 3
ENSMFAG00000036969	CASP3	-0.542802	0.011028			protein_coding	caspase 3
ENSMFAG00000037329	ZMAT2	-0.345187	0.011028			protein_coding	zinc finger matrin-type 2
ENSMFAG00000041347	FOXN2	-0.197664	0.011028			protein_coding	forkhead box N2
ENSMFAG00000045984	OTUD4	-0.160939	0.011028			protein_coding	OTU deubiquitinase 4
ENSMFAG00000033222		0.716071	0.0110451			protein_coding
ENSMFAG00000007738	RF00017	0.836367	0.0110602			misc_RNA	Metazoan signal recognition particle RNA
ENSMFAG00000000745	EEF1E1	-0.358195	0.0110677			protein_coding	eukaryotic translation elongation factor 1 epsilon 1
ENSMFAG00000001002	RILP	0.302778	0.0110677			protein_coding	Rab interacting lysosomal protein
ENSMFAG00000002843		-0.176915	0.0110677			protein_coding	E2F associated phosphoprotein
ENSMFAG00000004699	EIF3H	-0.2459	0.0110677			protein_coding	eukaryotic translation initiation factor 3 subunit H
ENSMFAG00000013212	RF00619	1.26113	0.0110677			snRNA	RNA, U6atac small nuclear 39, pseudogene
ENSMFAG00000030364	UBE2V2	-0.291446	0.0110677			protein_coding	ubiquitin conjugating enzyme E2 V2
ENSMFAG00000035356	DVL3	0.254184	0.0110677			protein_coding	dishevelled segment polarity protein 3
ENSMFAG00000036794	PSMB10	-0.338415	0.0110677			protein_coding	proteasome subunit beta 10
ENSMFAG00000038495	TSNAX	-0.346782	0.0110677			protein_coding	translin associated factor X
ENSMFAG00000043741	C5orf24	-0.328936	0.0110677			protein_coding	chromosome 5 open reading frame 24
ENSMFAG00000029017	RF00151	0.453509	0.0110791			snoRNA	Small nucleolar RNA SNORD58
ENSMFAG00000041829	MAU2	0.262827	0.0110859			protein_coding	MAU2 sister chromatid cohesion factor
ENSMFAG00000046271	BAG5	-0.187623	0.0110859			protein_coding	BCL2 associated athanogene 5
ENSMFAG00000002964	MRPL35	-0.424694	0.0111137			protein_coding	mitochondrial ribosomal protein L35
ENSMFAG00000037984	SLC22A4	0.445369	0.0111137	Proinflammatory		protein_coding	solute carrier family 22 member 4
ENSMFAG00000042874	ERH	-0.237218	0.0111137			protein_coding	ERH mRNA splicing and mitosis factor
ENSMFAG00000039151	SQOR	-0.344468	0.0111158			protein_coding	sulfide quinone oxidoreductase
ENSMFAG00000045831	ATG14	0.197891	0.0111194			protein_coding	autophagy related 14
ENSMFAG00000001651		1.16719	0.0111257			protein_coding	butyrophilin subfamily 2 member A2-like
ENSMFAG00000002327	CDC40	-0.295613	0.0111257			protein_coding	cell division cycle 40
ENSMFAG00000002437	TLR8	-0.321948	0.0111257	Proinflammatory		protein_coding	Macaca fascicularis toll like receptor 8 (TLR8), mRNA.
ENSMFAG00000003953	PTOV1	0.237496	0.0111257			protein_coding	PTOV1 extended AT-hook containing adaptor protein
ENSMFAG00000023214	RF00017	1.11272	0.0111257			misc_RNA	Metazoan signal recognition particle RNA
ENSMFAG00000028411		0.421099	0.0111257			protein_coding
ENSMFAG00000029352		-0.354922	0.0111257			protein_coding	actin, cytoplasmic 2-like
ENSMFAG00000032565	TNFSF13B	-0.450097	0.0111257	Proinflammatory		protein_coding	TNF superfamily member 13b
ENSMFAG00000035582	RTRAF	-0.270708	0.0111257			protein_coding	RNA transcription, translation and transport factor
ENSMFAG00000036590	EAF1	0.430116	0.0111257	Proinflammatory		protein_coding	ELL associated factor 1
ENSMFAG00000037155	EIF2S2	-0.289077	0.0111257			protein_coding	eukaryotic translation initiation factor 2 subunit beta
ENSMFAG00000038518		-0.185801	0.0111257			protein_coding	eukaryotic translation initiation factor 5A
ENSMFAG00000040536	TNFAIP2	0.425987	0.0111257			protein_coding	TNF alpha induced protein 2
ENSMFAG00000043478	GIMAP6	-0.57204	0.0111257			protein_coding	GTPase, IMAP family member 6
ENSMFAG00000044256	COX15	-0.432881	0.0111257			protein_coding	cytochrome c oxidase assembly homolog COX15
ENSMFAG00000044956		0.497568	0.0111257			protein_coding
ENSMFAG00000045788	SELENOW	0.523507	0.0111257			protein_coding	selenoprotein W
ENSMFAG00000009280	RF00100	1.0643	0.0111391			misc_RNA	7SK RNA
ENSMFAG00000000220		-0.247231	0.0111748			protein_coding	mitochondrial fission factor
ENSMFAG00000002534		0.617755	0.0111748			protein_coding
ENSMFAG00000037529		-0.255	0.0111748			protein_coding	dol-P-Glc:Glc(2)Man(9)GlcNAc(2)-PP-Dol alpha-1,2-glucosyltransferase
ENSMFAG00000039492	ALOX12	0.582422	0.0111748			protein_coding	arachidonate 12-lipoxygenase, 12S type
ENSMFAG00000042159	BMT2	-0.18444	0.0111748			protein_coding	base methyltransferase of 25S rRNA 2 homolog
ENSMFAG00000042258	PPP4R2	-0.26744	0.0111748			protein_coding	protein phosphatase 4 regulatory subunit 2
ENSMFAG00000043997	PER1	0.570255	0.0111748	Proinflammatory		protein_coding	period circadian regulator 1
ENSMFAG00000044247	RAB22A	-0.162736	0.0111748			protein_coding	RAB22A, member RAS oncogene family
ENSMFAG00000043635	PSMG3	-0.302683	0.011181			protein_coding	proteasome assembly chaperone 3
ENSMFAG00000036403	ABCA2	0.470949	0.0111908			protein_coding	ATP binding cassette subfamily A member 2
ENSMFAG00000042937	VPS26A	-0.218444	0.0112036			protein_coding	VPS26, retromer complex component A
ENSMFAG00000045168	MTMR1	-0.259844	0.0112036			protein_coding	myotubularin related protein 1
ENSMFAG00000033055		-0.374865	0.0112547			protein_coding
ENSMFAG00000017667	RF00017	1.24609	0.0112991			misc_RNA	Metazoan signal recognition particle RNA
ENSMFAG00000035329	HLA-DPA1	-0.774129	0.0112991			protein_coding	major histocompatibility complex, class II, DP alpha 1
ENSMFAG00000043413	PDK3	-0.259491	0.0112991			protein_coding	pyruvate dehydrogenase kinase 3
ENSMFAG00000022402		-0.378471	0.0113004			protein_coding
ENSMFAG00000000234	NBEAL2	0.428916	0.0113365			protein_coding	neurobeachin like 2
ENSMFAG00000000439		-0.246322	0.0113365			protein_coding	eukaryotic translation initiation factor 1A X-linked
ENSMFAG00000002129	RAD51C	-0.310305	0.0113365			protein_coding	RAD51 paralog C
ENSMFAG00000002381	CCDC9	0.412698	0.0113365			protein_coding	coiled-coil domain containing 9
ENSMFAG00000019952	RF00017	0.863635	0.0113365			misc_RNA	Metazoan signal recognition particle RNA
ENSMFAG00000031570	RNF170	-0.295892	0.0113365			protein_coding	ring finger protein 170
ENSMFAG00000033936	PSENEN	-0.236699	0.0113365			protein_coding	presenilin enhancer, gamma-secretase subunit
ENSMFAG00000035818		-0.377719	0.0113365			protein_coding	methionine adenosyltransferase 2B
ENSMFAG00000035854		-0.318283	0.0113365			protein_coding	cytidine/uridine monophosphate kinase 1
ENSMFAG00000036539		-0.307991	0.0113365			protein_coding	ATP synthase peripheral stalk subunit OSCP
ENSMFAG00000036604	ATG4D	0.356911	0.0113365			protein_coding	autophagy related 4D cysteine peptidase
ENSMFAG00000037696	SLC7A11	1.22696	0.0113365			protein_coding	solute carrier family 7 member 11
ENSMFAG00000040737	JUND	0.461259	0.0113365		Inflammatory	protein_coding	JunD proto-oncogene, AP-1 transcription factor subunit
ENSMFAG00000040845	NUFIP2	0.273506	0.0113365	Proinflammatory		protein_coding	nuclear FMR1 interacting protein 2
ENSMFAG00000043893	UBALD1	0.244411	0.0114071			protein_coding	UBA like domain containing 1
ENSMFAG00000002268	C5orf51	-0.310929	0.011449			protein_coding	chromosome 5 open reading frame 51
ENSMFAG00000030857	PDPK1	0.302025	0.0114571			protein_coding	3-phosphoinositide dependent protein kinase 1
ENSMFAG00000031433	CPNE3	-0.377833	0.0114571			protein_coding	copine 3
ENSMFAG00000039862		-0.207655	0.0114571			protein_coding	cytochrome c oxidase subunit 6B1
ENSMFAG00000044366		0.989487	0.0114571			protein_coding
ENSMFAG00000000541	TOPORS	-0.191774	0.0114958			protein_coding	TOP1 binding arginine/serine rich protein
ENSMFAG00000001162	PON2	-0.391149	0.0114958	Proinflammatory		protein_coding	paraoxonase 2
ENSMFAG00000001816	PLRG1	-0.209708	0.0114958			protein_coding	pleiotropic regulator 1
ENSMFAG00000002839	SNAPIN	-0.288143	0.0114958			protein_coding	SNAP associated protein
ENSMFAG00000031505	PRPS2	-0.373833	0.0114958			protein_coding	Macaca fascicularis phosphoribosyl pyrophosphate synthetase 2 (PRPS2), mRNA.
ENSMFAG00000033301	TRAK1	0.35141	0.0114958			protein_coding	trafficking kinesin protein 1
ENSMFAG00000037162	SGK3	-0.238536	0.0114958			protein_coding	serum/glucocorticoid regulated kinase family member 3
ENSMFAG00000038514	CYC1	-0.231272	0.0114958			protein_coding	cytochrome c1
ENSMFAG00000039497	SSR1	-0.318615	0.0114958	Proinflammatory		protein_coding	signal sequence receptor subunit 1
ENSMFAG00000039904	HCLS1	-0.182035	0.0114958			protein_coding	hematopoietic cell-specific Lyn substrate 1
ENSMFAG00000043790	OSTF1	-0.253003	0.0114958			protein_coding	osteoclast stimulating factor 1
ENSMFAG00000044833	ARMH3	0.327331	0.0114958			protein_coding	armadillo like helical domain containing 3
ENSMFAG00000046185	DDOST	-0.290001	0.0114958			protein_coding	dolichyl-diphosphooligosaccharide--protein glycosyltransferase non-catalytic subunit
ENSMFAG00000000260	UBE2D4	-0.249049	0.0115053			protein_coding	ubiquitin conjugating enzyme E2 D4 (putative)
ENSMFAG00000000723	PSMA7	-0.18217	0.0115053			protein_coding	proteasome subunit alpha 7
ENSMFAG00000000916	APOL2	-0.842818	0.0115053			protein_coding	apolipoprotein L2
ENSMFAG00000000936	PGLS	-0.224028	0.0115053			protein_coding	6-phosphogluconolactonase
ENSMFAG00000001398	MIB2	0.288581	0.0115053			protein_coding	mindbomb E3 ubiquitin protein ligase 2
ENSMFAG00000002009	CCDC157	0.37991	0.0115053			protein_coding	coiled-coil domain containing 157
ENSMFAG00000002438	CDK16	0.271362	0.0115053			protein_coding	cyclin dependent kinase 16
ENSMFAG00000002736	GINS1	-0.396576	0.0115053			protein_coding	GINS complex subunit 1
ENSMFAG00000002919	CD53	-0.290303	0.0115053			protein_coding	CD53 molecule
ENSMFAG00000004061	ME2	-0.261944	0.0115053			protein_coding	malic enzyme 2
ENSMFAG00000004333	NOP2	0.373508	0.0115053			protein_coding	NOP2 nucleolar protein
ENSMFAG00000004582	RF00026	0.974351	0.0115053			snRNA	U6 spliceosomal RNA
ENSMFAG00000004660	ASH1L	0.317498	0.0115053			protein_coding	ASH1 like histone lysine methyltransferase
ENSMFAG00000009744	RF01684	1.62224	0.0115053			sRNA
ENSMFAG00000019748	RF00017	0.795108	0.0115053			misc_RNA	Metazoan signal recognition particle RNA
ENSMFAG00000026566	GPR3	0.755491	0.0115053			protein_coding	G protein-coupled receptor 3
ENSMFAG00000027740		0.903669	0.0115053			protein_coding
ENSMFAG00000029679		0.531291	0.0115053			protein_coding
ENSMFAG00000030332	ATP5F1C	-0.300853	0.0115053			protein_coding	ATP synthase F1 subunit gamma
ENSMFAG00000030518	UBE2K	-0.271059	0.0115053			protein_coding	ubiquitin conjugating enzyme E2 K
ENSMFAG00000030929		-0.277805	0.0115053			protein_coding	E2F-associated phosphoprotein-like
ENSMFAG00000031574	DYNC1LI1	-0.211896	0.0115053			protein_coding	dynein cytoplasmic 1 light intermediate chain 1
ENSMFAG00000031761	DDX41	-0.175495	0.0115053			protein_coding	DEAD-box helicase 41
ENSMFAG00000033059	NUFIP1	0.409981	0.0115053			protein_coding	nuclear FMR1 interacting protein 1
ENSMFAG00000033392	ATF3	0.615915	0.0115053			protein_coding	activating transcription factor 3
ENSMFAG00000033708	DGCR8	0.218	0.0115053			protein_coding	DGCR8 microprocessor complex subunit
ENSMFAG00000034162	WDR74	0.251376	0.0115053			protein_coding	WD repeat domain 74
ENSMFAG00000035312	SOCS1	1.11963	0.0115053			protein_coding	suppressor of cytokine signaling 1
ENSMFAG00000035763	HCFC1	0.225094	0.0115053			protein_coding	host cell factor C1
ENSMFAG00000036304	YIPF1	-0.26662	0.0115053			protein_coding	Yip1 domain family member 1
ENSMFAG00000036603	NSUN4	0.318112	0.0115053			protein_coding	NOP2/Sun RNA methyltransferase 4
ENSMFAG00000036678	ARPC5	-0.295738	0.0115053			protein_coding	actin related protein 2/3 complex subunit 5
ENSMFAG00000036868		-0.271535	0.0115053			protein_coding	TBC1 domain family member 31
ENSMFAG00000038031	FUNDC2	-0.337075	0.0115053			protein_coding	FUN14 domain containing 2
ENSMFAG00000038075		0.28218	0.0115053			protein_coding	chromosome X open reading frame, human CXorf40B
ENSMFAG00000038534	UBALD2	0.30542	0.0115053			protein_coding	UBA like domain containing 2
ENSMFAG00000038676	SLC25A11	-0.208353	0.0115053			protein_coding	solute carrier family 25 member 11
ENSMFAG00000038696	REL	0.399799	0.0115053		Inflammatory	protein_coding	REL proto-oncogene, NF-kB subunit
ENSMFAG00000039785		-0.223622	0.0115053			protein_coding	ribosomal protein L38
ENSMFAG00000040608	TBC1D7	0.368868	0.0115053			protein_coding	TBC1 domain family member 7
ENSMFAG00000041212	CPSF2	-0.304256	0.0115053			protein_coding	cleavage and polyadenylation specific factor 2
ENSMFAG00000041850	BCCIP	-0.291845	0.0115053			protein_coding	BRCA2 and CDKN1A interacting protein
ENSMFAG00000041877	VDAC3	-0.330619	0.0115053			protein_coding	voltage dependent anion channel 3
ENSMFAG00000043209	TMEM33	-0.333097	0.0115053			protein_coding	transmembrane protein 33
ENSMFAG00000044287		0.698165	0.0115053			protein_coding
ENSMFAG00000044583	INTS11	0.20153	0.0115053			protein_coding	integrator complex subunit 11
ENSMFAG00000045002	PSMB6	-0.258947	0.0115053			protein_coding	proteasome subunit beta 6
ENSMFAG00000045344	ZFAND6	-0.250346	0.0115053			protein_coding	zinc finger AN1-type containing 6
ENSMFAG00000045501	NMI	-0.358495	0.0115053			protein_coding	N-myc and STAT interactor
ENSMFAG00000045557	TIPRL	-0.409225	0.0115053			protein_coding	TOR signaling pathway regulator
ENSMFAG00000046018		1.06403	0.0115053			protein_coding
ENSMFAG00000046123	USP33	-0.186309	0.0115053			protein_coding	ubiquitin specific peptidase 33
ENSMFAG00000046129	MRPS10	-0.303026	0.0115053			protein_coding	mitochondrial ribosomal protein S10
ENSMFAG00000014728	RF01241	0.517254	0.011527			snoRNA	small nucleolar RNA, H/ACA box 81
ENSMFAG00000030158	FKBP5	-0.38325	0.011527	Proinflammatory		protein_coding	FKBP prolyl isomerase 5
ENSMFAG00000034529		-0.214349	0.011527			protein_coding	39S ribosomal protein L23, mitochondrial
ENSMFAG00000035438	MED13L	0.263439	0.011527			protein_coding	mediator complex subunit 13L
ENSMFAG00000036591	COG2	-0.197698	0.011527			protein_coding	component of oligomeric golgi complex 2
ENSMFAG00000045847	SAYSD1	-0.22774	0.011527			protein_coding	SAYSVFN motif domain containing 1
ENSMFAG00000046229	FIBP	-0.292624	0.011527			protein_coding	FGF1 intracellular binding protein
ENSMFAG00000039826	PRDX3	-0.440088	0.0115483			protein_coding	peroxiredoxin 3
ENSMFAG00000031139	NFKB2	0.423187	0.0115811		Inflammatory	protein_coding	nuclear factor kappa B subunit 2
ENSMFAG00000042824	FAM104A	-0.232203	0.0115811			protein_coding	family with sequence similarity 104 member A
ENSMFAG00000043682		-0.422555	0.0115811			protein_coding
ENSMFAG00000043236	YWHAB	-0.335997	0.0116067			protein_coding	tyrosine 3-monooxygenase/tryptophan 5-monooxygenase activation protein beta
ENSMFAG00000011029	MIRLET7D	0.817159	0.0116146			miRNA	microRNA let-7d
ENSMFAG00000023923		1.20811	0.0116208			pseudogene
ENSMFAG00000033454	RIC8A	0.188063	0.0116339			protein_coding	RIC8 guanine nucleotide exchange factor A
ENSMFAG00000002101	INTS6	0.234598	0.0116421			protein_coding	integrator complex subunit 6
ENSMFAG00000031721	KDM2A	0.176228	0.0116421			protein_coding	lysine demethylase 2A
ENSMFAG00000032976	CDADC1	0.627406	0.0116421			protein_coding	cytidine and dCMP deaminase domain containing 1
ENSMFAG00000044357	VPS8	0.247294	0.0116421			protein_coding	VPS8 subunit of CORVET complex
ENSMFAG00000041237	CAPZA2	-0.273282	0.0116495			protein_coding	capping actin protein of muscle Z-line subunit alpha 2
ENSMFAG00000038577	MTMR14	0.177692	0.0117029			protein_coding	myotubularin related protein 14
ENSMFAG00000030078	SMIM12	-0.312075	0.0117236			protein_coding	small integral membrane protein 12
ENSMFAG00000000543	RWDD4	-0.283058	0.0117315			protein_coding	RWD domain containing 4
ENSMFAG00000000606	RAC2	-0.265296	0.0117315			protein_coding	Rac family small GTPase 2
ENSMFAG00000000919	TMEM126A	-0.253625	0.0117315			protein_coding	transmembrane protein 126A
ENSMFAG00000001263	TRAFD1	-0.272849	0.0117315			protein_coding	TRAF-type zinc finger domain containing 1
ENSMFAG00000002592	INPP5E	0.309008	0.0117315			protein_coding	inositol polyphosphate-5-phosphatase E
ENSMFAG00000002945	TP53BP1	0.210135	0.0117315			protein_coding	tumor protein p53 binding protein 1
ENSMFAG00000004992	HIC2	0.35713	0.0117315			protein_coding	HIC ZBTB transcriptional repressor 2
ENSMFAG00000020113	CHD3	0.334301	0.0117315			protein_coding	chromodomain helicase DNA binding protein 3
ENSMFAG00000026126		0.457158	0.0117315			protein_coding
ENSMFAG00000031932	TAF4B	0.886716	0.0117315			protein_coding	TATA-box binding protein associated factor 4b
ENSMFAG00000032161	MED12	0.301169	0.0117315			protein_coding	mediator complex subunit 12
ENSMFAG00000032204	PSMD8	-0.210909	0.0117315			protein_coding	proteasome 26S subunit, non-ATPase 8
ENSMFAG00000032373	CENPN	0.557016	0.0117315			protein_coding	centromere protein N
ENSMFAG00000033615	FOXO3	0.404001	0.0117315			protein_coding	forkhead box O3
ENSMFAG00000037912	RPL27	-0.345008	0.0117315			protein_coding	ribosomal protein L27
ENSMFAG00000038686	TNNT3	0.852323	0.0117315			protein_coding	troponin T3, fast skeletal type
ENSMFAG00000042190	SGPP1	-0.398762	0.0117315	Regulatory		protein_coding	sphingosine-1-phosphate phosphatase 1
ENSMFAG00000044917		-0.325683	0.0117315			protein_coding
ENSMFAG00000038619	PREPL	-0.292509	0.0117479			protein_coding	prolyl endopeptidase like
ENSMFAG00000040024	KARS	-0.301591	0.0117479			protein_coding	lysyl-tRNA synthetase
ENSMFAG00000041500		-0.271885	0.0117479			protein_coding	succinate-CoA ligase GDP-forming beta subunit
ENSMFAG00000001719		0.649841	0.0117537			protein_coding
ENSMFAG00000018925	SMIM15	-0.263029	0.0117537			protein_coding	small integral membrane protein 15
ENSMFAG00000032511	YIF1A	-0.280828	0.0117607			protein_coding	Yip1 interacting factor homolog A, membrane trafficking protein
ENSMFAG00000000320	SAP30L	-0.251386	0.0117655			protein_coding	SAP30 like
ENSMFAG00000001322	LACTB	-0.21347	0.0117655			protein_coding	lactamase beta
ENSMFAG00000001649	ATP5F1A	-0.430404	0.0117655			protein_coding	ATP synthase F1 subunit alpha
ENSMFAG00000003828	CD46	-0.237001	0.0117655	Proinflammatory		protein_coding	CD46 molecule
ENSMFAG00000015596	RF00091	0.349435	0.0117655			snoRNA	Small nucleolar RNA SNORA62/SNORA6 family
ENSMFAG00000028385	RNF123	0.288707	0.0117655			protein_coding	ring finger protein 123
ENSMFAG00000032199		-0.251956	0.0117655			protein_coding	ribosomal protein S18
ENSMFAG00000032880	QRSL1	-0.315708	0.0117655			protein_coding	glutaminyl-tRNA amidotransferase subunit QRSL1
ENSMFAG00000035544	PPP1R10	0.385594	0.0117655			protein_coding	protein phosphatase 1 regulatory subunit 10
ENSMFAG00000036672	DR1	-0.281976	0.0117655			protein_coding	down-regulator of transcription 1
ENSMFAG00000040760		-0.266725	0.0117655			protein_coding	NADH:ubiquinone oxidoreductase subunit B8
ENSMFAG00000041161	COMMD8	-0.330991	0.0117655			protein_coding	COMM domain containing 8
ENSMFAG00000041409	CEP68	0.305272	0.0117655			protein_coding	centrosomal protein 68
ENSMFAG00000042009		-0.251106	0.0117655			protein_coding
ENSMFAG00000042489	TLCD2	0.425952	0.0117655			protein_coding	TLC domain containing 2
ENSMFAG00000042514		-0.32971	0.0117655			protein_coding
ENSMFAG00000043411		-0.291111	0.0117655			protein_coding
ENSMFAG00000000081	PSMA5	-0.35371	0.0117696			protein_coding	proteasome subunit alpha 5
ENSMFAG00000001588	ZNF589	0.420539	0.0117696			protein_coding	zinc finger protein 589
ENSMFAG00000030990		0.559472	0.0117696			protein_coding
ENSMFAG00000031648	RBM43	-0.434942	0.0117696			protein_coding	RNA binding motif protein 43
ENSMFAG00000032644	XPOT	-0.232382	0.0117696			protein_coding	exportin for tRNA
ENSMFAG00000037767		0.565442	0.0117696			protein_coding
ENSMFAG00000039827		-0.357995	0.0117696			protein_coding
ENSMFAG00000001165	ARL14EP	-0.294031	0.0117817			protein_coding	ADP ribosylation factor like GTPase 14 effector protein
ENSMFAG00000035179	CAPZA1	-0.241853	0.0117817			protein_coding	capping actin protein of muscle Z-line subunit alpha 1
ENSMFAG00000035498		-0.493088	0.0117817			protein_coding	GTPase, IMAP family member 1
ENSMFAG00000036583	RNF2	-0.247935	0.0117817			protein_coding	ring finger protein 2
ENSMFAG00000036900	UBAC1	-0.259029	0.0117817			protein_coding	UBA domain containing 1
ENSMFAG00000038309	FUBP3	-0.178033	0.0117817			protein_coding	far upstream element binding protein 3
ENSMFAG00000043121		-0.220619	0.0117817			protein_coding	thymosin beta 4 Y-linked
ENSMFAG00000003471	CPLANE2	-0.299817	0.0117854			protein_coding	ciliogenesis and planar polarity effector 2
ENSMFAG00000002379	MRPL16	-0.266826	0.0117864			protein_coding	mitochondrial ribosomal protein L16
ENSMFAG00000002190		0.941982	0.0117888			protein_coding
ENSMFAG00000019841	RF00017	1.18991	0.0117888			misc_RNA	Metazoan signal recognition particle RNA
ENSMFAG00000014576	RF00019	0.987038	0.0117909			misc_RNA	Y RNA
ENSMFAG00000000102	LRIG2	0.282191	0.0117964			protein_coding	leucine rich repeats and immunoglobulin like domains 2
ENSMFAG00000014674		0.759632	0.0117964			miRNA
ENSMFAG00000020756	RF00089	0.817755	0.0117964			snoRNA	Small nucleolar RNA SNORD31
ENSMFAG00000032542	LYAR	-0.575519	0.0117964			protein_coding	Macaca fascicularis Ly1 antibody reactive (LYAR), mRNA.
ENSMFAG00000036396	GIMAP7	-0.478774	0.0117964			protein_coding	GTPase, IMAP family member 7
ENSMFAG00000038054	EMC7	-0.312342	0.0117964			protein_coding	ER membrane protein complex subunit 7
ENSMFAG00000002359	SMIM19	-0.315395	0.0117982			protein_coding	small integral membrane protein 19
ENSMFAG00000002066	EXT1	0.374944	0.0118136			protein_coding	exostosin glycosyltransferase 1
ENSMFAG00000034415	AAMP	-0.255846	0.0118136			protein_coding	angio associated migratory cell protein
ENSMFAG00000036398	RSRC2	0.233252	0.0118136			protein_coding	arginine and serine rich coiled-coil 2
ENSMFAG00000000701	GORASP1	0.153206	0.0118249			protein_coding	golgi reassembly stacking protein 1
ENSMFAG00000003758	USP37	0.210714	0.0118249			protein_coding	ubiquitin specific peptidase 37
ENSMFAG00000031102	DTX3L	-0.511601	0.0118249			protein_coding	deltex E3 ubiquitin ligase 3L
ENSMFAG00000031110	PANK3	-0.23263	0.0118249			protein_coding	pantothenate kinase 3
ENSMFAG00000031124	SSBP3	0.213886	0.0118249			protein_coding	single stranded DNA binding protein 3
ENSMFAG00000033673	C1H1orf43	-0.29857	0.0118249			protein_coding	chromosome 1 open reading frame, human C1orf43
ENSMFAG00000033954	FCHSD1	0.265313	0.0118249			protein_coding	FCH and double SH3 domains 1
ENSMFAG00000036319		1.15702	0.0118249			protein_coding	C-C motif chemokine ligand 18
ENSMFAG00000037180		0.53594	0.0118249			protein_coding
ENSMFAG00000037346	GRSF1	-0.320546	0.0118249			protein_coding	G-rich RNA sequence binding factor 1
ENSMFAG00000038667	RBSN	0.212526	0.0118249			protein_coding	rabenosyn, RAB effector
ENSMFAG00000042533	PSMC2	-0.270306	0.0118249			protein_coding	proteasome 26S subunit, ATPase 2
ENSMFAG00000042971	MRPS7	-0.222021	0.0118249			protein_coding	mitochondrial ribosomal protein S7
ENSMFAG00000046280	METTL5	-0.36645	0.0118249			protein_coding	methyltransferase like 5
ENSMFAG00000031080	ZRANB1	0.127472	0.0118342			protein_coding	zinc finger RANBP2-type containing 1
ENSMFAG00000034332	RABGAP1L	0.259173	0.0118342	Regulatory		protein_coding	RAB GTPase activating protein 1 like
ENSMFAG00000039797	PHIP	0.379882	0.0118342			protein_coding	pleckstrin homology domain interacting protein
ENSMFAG00000044517	AHCYL1	-0.238455	0.0118342			protein_coding	adenosylhomocysteinase like 1
ENSMFAG00000002388	PRKAB1	-0.227679	0.0118496			protein_coding	protein kinase AMP-activated non-catalytic subunit beta 1
ENSMFAG00000017749	SEC62	-0.244812	0.0118769	Proinflammatory		protein_coding	SEC62 homolog, preprotein translocation factor
ENSMFAG00000009755	MRPL13	-0.366436	0.0118789			protein_coding	mitochondrial ribosomal protein L13
ENSMFAG00000033225		-0.237915	0.0118801			protein_coding	MRT4 homolog, ribosome maturation factor
ENSMFAG00000019863	RNF130	-0.22967	0.0118824			protein_coding	ring finger protein 130
ENSMFAG00000031012	INTS6L	0.227162	0.0118824			protein_coding	integrator complex subunit 6 like
ENSMFAG00000031020	SCAF1	0.193903	0.0118824			protein_coding	SR-related CTD associated factor 1
ENSMFAG00000034452	PEPD	-0.380311	0.0118824			protein_coding	peptidase D
ENSMFAG00000035844	C12orf49	-0.220763	0.0118824			protein_coding	chromosome 12 open reading frame 49
ENSMFAG00000045375	CRTC1	0.369627	0.0118824			protein_coding	CREB regulated transcription coactivator 1
ENSMFAG00000002683	PSMF1	-0.276597	0.0118929			protein_coding	proteasome inhibitor subunit 1
ENSMFAG00000029976	TNKS	0.432625	0.0118929			protein_coding	tankyrase
ENSMFAG00000036153	LGALS3	-0.380569	0.0119096			protein_coding	galectin 3
ENSMFAG00000044456	PXDC1	0.874304	0.011913			protein_coding	PX domain containing 1
ENSMFAG00000007326	RF02271	0.628815	0.0119152			misc_RNA
ENSMFAG00000040040	RBM25	0.167977	0.0119187			protein_coding	RNA binding motif protein 25
ENSMFAG00000041100	ZZEF1	0.362239	0.0119187			protein_coding	zinc finger ZZ-type and EF-hand domain containing 1
ENSMFAG00000021299	RF00404	-0.956408	0.0119477			snoRNA
ENSMFAG00000033691		-0.268262	0.0120113			protein_coding	ATP synthase peripheral stalk subunit d
ENSMFAG00000002735	RNF13	-0.191252	0.0120248			protein_coding	ring finger protein 13
ENSMFAG00000039516	MTDH	-0.186169	0.0120248	Proinflammatory		protein_coding	metadherin
ENSMFAG00000041879	CHCHD1	-0.303662	0.0120404			protein_coding	coiled-coil-helix-coiled-coil-helix domain containing 1
ENSMFAG00000014002	RF00019	0.911026	0.0120738			misc_RNA	Y RNA
ENSMFAG00000001306	F13A1	-0.43687	0.0120778	Proinflammatory		protein_coding	coagulation factor XIII A chain
ENSMFAG00000001772		-0.576821	0.0120778			protein_coding
ENSMFAG00000012713		-0.676923	0.0120778			protein_coding
ENSMFAG00000014609	FEZ2	-0.239609	0.0120778			protein_coding	fasciculation and elongation protein zeta 2
ENSMFAG00000027720	PWWP2A	0.242422	0.0120778			protein_coding	PWWP domain containing 2A
ENSMFAG00000031096	SNU13	-0.227028	0.0120778			protein_coding	small nuclear ribonucleoprotein 13
ENSMFAG00000033073	LSM6	-0.373982	0.0120778	Regulatory		protein_coding	LSM6 homolog, U6 small nuclear RNA and mRNA degradation associated
ENSMFAG00000036847		-0.24841	0.0120778			protein_coding	ADP ribosylation factor 3
ENSMFAG00000040558	TENT5A	0.371593	0.0120778			protein_coding	terminal nucleotidyltransferase 5A
ENSMFAG00000043140		0.994503	0.0120778			protein_coding
ENSMFAG00000045088	ATP6V1C1	-0.313992	0.0120778			protein_coding	ATPase H+ transporting V1 subunit C1
ENSMFAG00000046216	THAP2	0.467125	0.0120778			protein_coding	THAP domain containing 2
ENSMFAG00000040665	SPCS2	-0.301976	0.0120881			protein_coding	signal peptidase complex subunit 2
ENSMFAG00000003775	MSI2	0.300709	0.0121197			protein_coding	musashi RNA binding protein 2
ENSMFAG00000011842	TUT4	0.278569	0.0121197			protein_coding	terminal uridylyl transferase 4
ENSMFAG00000025726	SRRM1	0.179169	0.0121197			protein_coding	serine and arginine repetitive matrix 1
ENSMFAG00000031927	YTHDC1	0.137088	0.0121197			protein_coding	YTH domain containing 1
ENSMFAG00000031979	SF3A1	0.149525	0.0121197	Proinflammatory		protein_coding	splicing factor 3a subunit 1
ENSMFAG00000033318		-0.33256	0.0121197			protein_coding	60S ribosomal protein L11-like
ENSMFAG00000038372	TSSC4	0.200337	0.0121197			protein_coding	tumor suppressing subtransferable candidate 4
ENSMFAG00000038703	UBQLN1	-0.208509	0.0121197			protein_coding	ubiquilin 1
ENSMFAG00000039148	SHQ1	-0.249305	0.0121197			protein_coding	SHQ1, H/ACA ribonucleoprotein assembly factor
ENSMFAG00000042282	VPS4B	-0.283283	0.0121197			protein_coding	vacuolar protein sorting 4 homolog B
ENSMFAG00000043634	SEC61A1	-0.293989	0.0121197	Proinflammatory		protein_coding	SEC61 translocon alpha 1 subunit
ENSMFAG00000046027	ZNF324B	0.429451	0.0121338			protein_coding	zinc finger protein 324B
ENSMFAG00000019220	ALG5	-0.229008	0.0121679			protein_coding	ALG5 dolichyl-phosphate beta-glucosyltransferase
ENSMFAG00000044060	EPS15	-0.293999	0.0121679			protein_coding	epidermal growth factor receptor pathway substrate 15
ENSMFAG00000007883	KRCC1	-0.404366	0.012172			protein_coding	lysine rich coiled-coil 1
ENSMFAG00000003936	HIGD1A	-0.372519	0.01219			protein_coding	HIG1 hypoxia inducible domain family member 1A
ENSMFAG00000038257	KDM6B	0.604076	0.01219			protein_coding	lysine demethylase 6B
ENSMFAG00000038311	MRPS18A	-0.150768	0.01219			protein_coding	mitochondrial ribosomal protein S18A
ENSMFAG00000042222	FAM49B	-0.210178	0.01219			protein_coding	family with sequence similarity 49 member B
ENSMFAG00000042659	GBE1	0.416516	0.01219			protein_coding	1,4-alpha-glucan branching enzyme 1
ENSMFAG00000045021	TOMM5	-0.272046	0.01219			protein_coding	translocase of outer mitochondrial membrane 5
ENSMFAG00000045779	CD69	0.639311	0.01219			protein_coding	CD69 molecule
ENSMFAG00000001366	GLRX3	-0.237019	0.0121998			protein_coding	glutaredoxin 3
ENSMFAG00000001660	TAF13	-0.409469	0.0121998			protein_coding	TATA-box binding protein associated factor 13
ENSMFAG00000001705		0.491419	0.0121998			protein_coding
ENSMFAG00000002946	KLHL11	0.427054	0.0121998			protein_coding	Macaca fascicularis kelch like family member 11 (KLHL11), mRNA.
ENSMFAG00000003705	PHF6	-0.229635	0.0121998			protein_coding	PHD finger protein 6
ENSMFAG00000004849	SLC33A1	-0.31771	0.0121998			protein_coding	solute carrier family 33 member 1
ENSMFAG00000007699	MIR21	0.667799	0.0121998			miRNA	microRNA 21
ENSMFAG00000023918	RF02116	1.26861	0.0121998			misc_RNA
ENSMFAG00000030104	CCNL1	0.576055	0.0121998	Proinflammatory		protein_coding	cyclin L1
ENSMFAG00000030200	FAM110A	0.498117	0.0121998	Regulatory		protein_coding	family with sequence similarity 110 member A
ENSMFAG00000030968	NEMP2	0.30408	0.0121998			protein_coding	nuclear envelope integral membrane protein 2
ENSMFAG00000032524	UROD	-0.264644	0.0121998			protein_coding	uroporphyrinogen decarboxylase
ENSMFAG00000032769	WDR25	0.310259	0.0121998			protein_coding	WD repeat domain 25
ENSMFAG00000033826	RF00019	1.0918	0.0121998			misc_RNA	Y RNA
ENSMFAG00000034295		-0.368732	0.0121998			protein_coding	elongation factor 1-gamma-like
ENSMFAG00000035456	EIF3E	-0.379648	0.0121998			protein_coding	eukaryotic translation initiation factor 3 subunit E
ENSMFAG00000036353	DDHD1	0.30405	0.0121998			protein_coding	DDHD domain containing 1
ENSMFAG00000036663	CAP1	-0.335908	0.0121998			protein_coding	cyclase associated actin cytoskeleton regulatory protein 1
ENSMFAG00000036696	FAM111A	-0.403804	0.0121998	Proinflammatory		protein_coding	family with sequence similarity 111 member A
ENSMFAG00000037382	SDHAF2	-0.281119	0.0121998			protein_coding	succinate dehydrogenase complex assembly factor 2
ENSMFAG00000039496	SLC26A1	0.606893	0.0121998			protein_coding	solute carrier family 26 member 1
ENSMFAG00000041218	MRPL32	-0.334929	0.0121998			protein_coding	mitochondrial ribosomal protein L32
ENSMFAG00000043022		-0.404275	0.0121998			protein_coding
ENSMFAG00000046149	KDM3A	0.187107	0.0121998			protein_coding	lysine demethylase 3A
ENSMFAG00000039793	MRPS9	-0.265213	0.0123368			protein_coding	mitochondrial ribosomal protein S9
ENSMFAG00000001968	TMOD3	-0.290277	0.0123852			protein_coding	tropomodulin 3
ENSMFAG00000036062		-0.218168	0.0123852			protein_coding	ATP synthase membrane subunit f
ENSMFAG00000041952	CEP131	0.393403	0.0123852			protein_coding	centrosomal protein 131
ENSMFAG00000042250	POLR2B	-0.265022	0.0123852			protein_coding	RNA polymerase II subunit B
ENSMFAG00000021183	RF00570	1.0453	0.0123962			snoRNA
ENSMFAG00000038116	MID2	-0.302942	0.0123962			protein_coding	midline 2
ENSMFAG00000045829		0.537104	0.0123962			protein_coding
ENSMFAG00000037478	SCLT1	0.26299	0.0124101			protein_coding	sodium channel and clathrin linker 1
ENSMFAG00000000201	NIPA2	-0.259117	0.0124115			protein_coding	NIPA magnesium transporter 2
ENSMFAG00000004075	FCHSD2	0.277874	0.0124115	Proinflammatory		protein_coding	FCH and double SH3 domains 2
ENSMFAG00000004741		-0.197342	0.0124115			protein_coding	tyrosine 3-monooxygenase/tryptophan 5-monooxygenase activation protein theta
ENSMFAG00000013224	ZNF146	-0.410256	0.0124115			protein_coding	zinc finger protein 146
ENSMFAG00000021542		0.903902	0.0124115			miRNA
ENSMFAG00000035640	CASP4	-0.363042	0.0124115			protein_coding	caspase 4
ENSMFAG00000038574	YWHAG	-0.294685	0.0124115			protein_coding	tyrosine 3-monooxygenase/tryptophan 5-monooxygenase activation protein gamma
ENSMFAG00000039219	CALM1	-0.201558	0.0124115			protein_coding	calmodulin 1
ENSMFAG00000041114	CIAO3	0.192197	0.0124115			protein_coding	cytosolic iron-sulfur assembly component 3
ENSMFAG00000041227	PPIG	-0.179468	0.0124115			protein_coding	peptidylprolyl isomerase G
ENSMFAG00000041817	STN1	-0.394721	0.0124115			protein_coding	STN1 subunit of CST complex
ENSMFAG00000041892	FCHO1	0.308812	0.0124115			protein_coding	FCH domain only 1
ENSMFAG00000044861	PHF20	0.238033	0.0124115			protein_coding	PHD finger protein 20
ENSMFAG00000045028	ATP5MC2	-0.281559	0.0124115			protein_coding	ATP synthase membrane subunit c locus 2
ENSMFAG00000046183	METTL4	-0.423846	0.0124115			protein_coding	methyltransferase like 4
ENSMFAG00000002511		0.727451	0.0124137			protein_coding
ENSMFAG00000005325	RF00016	0.622583	0.0124137			snoRNA	Small nucleolar RNA SNORD14
ENSMFAG00000030932	NDUFA5	-0.325547	0.0124137			protein_coding	NADH:ubiquinone oxidoreductase subunit A5
ENSMFAG00000036375	NCF2	-0.187285	0.0124137	Proinflammatory		protein_coding	neutrophil cytosolic factor 2
ENSMFAG00000039567	UBAP2	0.161758	0.0124137			protein_coding	ubiquitin associated protein 2
ENSMFAG00000041912	TMEM251	0.554638	0.0124137			protein_coding	transmembrane protein 251
ENSMFAG00000046135	MYO9B	0.282325	0.0124137			protein_coding	myosin IXB
ENSMFAG00000036185	TTC19	0.302798	0.0124297			protein_coding	tetratricopeptide repeat domain 19
ENSMFAG00000003856	SUPT4H1	-0.271539	0.0124366			protein_coding	SPT4 homolog, DSIF elongation factor subunit
ENSMFAG00000029971		-0.415863	0.0124366			protein_coding
ENSMFAG00000033364	HSD17B10	-0.289438	0.0124366			protein_coding	hydroxysteroid 17-beta dehydrogenase 10
ENSMFAG00000039286	CCT7	-0.24917	0.0124429			protein_coding	chaperonin containing TCP1 subunit 7
ENSMFAG00000037679	API5	-0.333794	0.0124521			protein_coding	apoptosis inhibitor 5
ENSMFAG00000043770	RALGAPA1	0.201537	0.0124521			protein_coding	Ral GTPase activating protein catalytic alpha subunit 1
ENSMFAG00000034547	STT3A	-0.320271	0.0124544			protein_coding	STT3 oligosaccharyltransferase complex catalytic subunit A
ENSMFAG00000037748	UPF1	0.219792	0.0124544			protein_coding	UPF1 RNA helicase and ATPase
ENSMFAG00000039362	RP2	-0.235515	0.0124544			protein_coding	RP2 activator of ARL3 GTPase
ENSMFAG00000040854		-0.407336	0.0124544			protein_coding
ENSMFAG00000042519		-0.549053	0.0124544			protein_coding
ENSMFAG00000043659	RRM2B	-0.281688	0.0124623			protein_coding	ribonucleotide reductase regulatory TP53 inducible subunit M2B
ENSMFAG00000000109	ATF1	-0.186692	0.0124874			protein_coding	activating transcription factor 1
ENSMFAG00000002638	SF3A2	0.240286	0.0124874			protein_coding	splicing factor 3a subunit 2
ENSMFAG00000003635	ITGAV	0.332788	0.0124874			protein_coding	integrin subunit alpha V
ENSMFAG00000004557		-0.412953	0.0124874			protein_coding	PALM2-AKAP2 fusion
ENSMFAG00000005271	RF00019	0.493936	0.0124874			misc_RNA	Y RNA
ENSMFAG00000030281	GPR84	0.800617	0.0124874			protein_coding	G protein-coupled receptor 84
ENSMFAG00000030723	KANSL1	0.243759	0.0124874			protein_coding	KAT8 regulatory NSL complex subunit 1
ENSMFAG00000031002	DEF8	0.341178	0.0124874			protein_coding	differentially expressed in FDCP 8 homolog
ENSMFAG00000031968	TFB1M	0.227492	0.0124874			protein_coding	transcription factor B1, mitochondrial
ENSMFAG00000040813	CYBB	-0.457528	0.0124874			protein_coding	cytochrome b-245 beta chain
ENSMFAG00000043107		0.747444	0.0124874			protein_coding
ENSMFAG00000044461	NUP210	0.337641	0.0124874			protein_coding	nucleoporin 210
ENSMFAG00000031796	ADORA2A	0.703221	0.0125233			protein_coding	adenosine A2a receptor
ENSMFAG00000000274	RBMS1	-0.204721	0.0125702	Proinflammatory		protein_coding	RNA binding motif single stranded interacting protein 1
ENSMFAG00000003700	CNIH4	-0.339458	0.0125713	Regulatory		protein_coding	cornichon family AMPA receptor auxiliary protein 4
ENSMFAG00000012469	ACTR10	-0.276014	0.0125713			protein_coding	actin related protein 10
ENSMFAG00000036341	SEC11A	-0.32064	0.0125713			protein_coding	SEC11 homolog A, signal peptidase complex subunit
ENSMFAG00000038339	SS18L1	0.422214	0.0126236			protein_coding	SS18L1 subunit of BAF chromatin remodeling complex
ENSMFAG00000001957	DMTF1	0.239431	0.0126468			protein_coding	cyclin D binding myb like transcription factor 1
ENSMFAG00000038786	REST	-0.239612	0.0126508			protein_coding	RE1 silencing transcription factor
ENSMFAG00000032781	LEPROTL1	-0.357348	0.0126532			protein_coding	leptin receptor overlapping transcript like 1
ENSMFAG00000033280		-0.377244	0.0126798			protein_coding	aldehyde dehydrogenase 9 family member A1
ENSMFAG00000000839	PRPS1	-0.312453	0.0126921			protein_coding	phosphoribosyl pyrophosphate synthetase 1
ENSMFAG00000001092	DPY19L4	-0.232379	0.0126921			protein_coding	dpy-19 like 4
ENSMFAG00000032871	ASB7	-0.335836	0.0126921			protein_coding	ankyrin repeat and SOCS box containing 7
ENSMFAG00000034098	TRIM27	-0.246156	0.0126921			protein_coding	tripartite motif containing 27
ENSMFAG00000034377	CREBBP	0.278303	0.0127299			protein_coding	CREB binding protein
ENSMFAG00000031710		0.576028	0.01274			protein_coding
ENSMFAG00000031132	PRSS12	1.12589	0.0127523			protein_coding	serine protease 12
ENSMFAG00000043797	SGTB	-0.232138	0.0127523			protein_coding	small glutamine rich tetratricopeptide repeat containing beta
ENSMFAG00000033180	NNAT	0.701237	0.0127664			protein_coding	neuronatin
ENSMFAG00000039280	C15orf40	-0.291656	0.0127664			protein_coding	chromosome 15 open reading frame 40
ENSMFAG00000041706	VIRMA	-0.262896	0.0127745			protein_coding	vir like m6A methyltransferase associated
ENSMFAG00000043846	INIP	-0.262347	0.0127972			protein_coding	INTS3 and NABP interacting protein
ENSMFAG00000002631	TRAM1	-0.289134	0.0128049			protein_coding	translocation associated membrane protein 1
ENSMFAG00000003351	FUZ	0.39424	0.0128206			protein_coding	fuzzy planar cell polarity protein
ENSMFAG00000039247	PJA2	-0.265606	0.0128227			protein_coding	praja ring finger ubiquitin ligase 2
ENSMFAG00000045157	SIAH1	0.317371	0.0128227			protein_coding	siah E3 ubiquitin protein ligase 1
ENSMFAG00000000594		-0.227002	0.0128418			protein_coding	basic transcription factor 3
ENSMFAG00000039835	GPATCH2L	0.301173	0.0128463			protein_coding	G-patch domain containing 2 like
ENSMFAG00000003991	MRPS18C	-0.291038	0.0128825			protein_coding	mitochondrial ribosomal protein S18C
ENSMFAG00000033107	BRIX1	-0.244278	0.0128825			protein_coding	biogenesis of ribosomes BRX1
ENSMFAG00000002019		0.940604	0.0129039			protein_coding
ENSMFAG00000033927	RBM4B	0.256857	0.0129039			protein_coding	RNA binding motif protein 4B
ENSMFAG00000000776	BAHCC1	0.381783	0.0129171			protein_coding	BAH domain and coiled-coil containing 1
ENSMFAG00000006242	EFCAB8	0.639175	0.0129171			protein_coding	EF-hand calcium binding domain 8
ENSMFAG00000010806		-0.336535	0.0129171			protein_coding
ENSMFAG00000032882	SIDT2	0.230315	0.0129171			protein_coding	SID1 transmembrane family member 2
ENSMFAG00000032932	PDHB	-0.271705	0.0129171			protein_coding	pyruvate dehydrogenase E1 beta subunit
ENSMFAG00000036348	PTPA	-0.254554	0.0129171			protein_coding	protein phosphatase 2 phosphatase activator
ENSMFAG00000040820	SFXN1	-0.237483	0.0129171			protein_coding	sideroflexin 1
ENSMFAG00000041280		1.13414	0.0129171			pseudogene
ENSMFAG00000043207	G6PD	-0.195924	0.0129171	Proinflammatory		protein_coding	glucose-6-phosphate dehydrogenase
ENSMFAG00000045751	CCNY	-0.138781	0.0129171	Proinflammatory		protein_coding	cyclin Y
ENSMFAG00000046426	ND6	0.502692	0.0129171			protein_coding	NADH dehydrogenase subunit 6
ENSMFAG00000038856	ZNF397	0.448427	0.0129192			protein_coding	zinc finger protein 397
ENSMFAG00000031270	NIFK	-0.315772	0.0129549			protein_coding	nucleolar protein interacting with the FHA domain of MKI67
ENSMFAG00000036850	GSTK1	-0.359553	0.0129604			protein_coding	glutathione S-transferase kappa 1
ENSMFAG00000037556	ERCC8	-0.309439	0.0129604	Proinflammatory		protein_coding	ERCC excision repair 8, CSA ubiquitin ligase complex subunit
ENSMFAG00000044514	AKTIP	-0.262509	0.0129604			protein_coding	AKT interacting protein
ENSMFAG00000030449	GPRASP2	-0.314727	0.013012			protein_coding	G protein-coupled receptor associated sorting protein 2
ENSMFAG00000013084	OGFOD1	-0.463839	0.0130259			protein_coding	2-oxoglutarate and iron dependent oxygenase domain containing 1
ENSMFAG00000032032	VBP1	-0.286329	0.0130265			protein_coding	VHL binding protein 1
ENSMFAG00000034610	VAPB	-0.25402	0.0130265			protein_coding	VAMP associated protein B and C
ENSMFAG00000035548	HMBOX1	0.342511	0.0130265	Proinflammatory		protein_coding	homeobox containing 1
ENSMFAG00000037308	HNRNPU	0.137383	0.0130265	Proinflammatory		protein_coding	heterogeneous nuclear ribonucleoprotein U
ENSMFAG00000039824	SNRNP70	0.260643	0.0130265	Proinflammatory		protein_coding	small nuclear ribonucleoprotein U1 subunit 70
ENSMFAG00000042896	TLR4	-0.344299	0.0130265	Proinflammatory		protein_coding	toll like receptor 4
ENSMFAG00000000380	MRPL50	-0.30495	0.0130384			protein_coding	mitochondrial ribosomal protein L50
ENSMFAG00000001927	PNPT1	-0.201126	0.0130384			protein_coding	polyribonucleotide nucleotidyltransferase 1
ENSMFAG00000002040	SLC9A8	0.432149	0.0130384			protein_coding	solute carrier family 9 member A8
ENSMFAG00000003686	PGD	-0.308211	0.0130384	Proinflammatory		protein_coding	phosphogluconate dehydrogenase
ENSMFAG00000042903	DGKA	0.301322	0.0130384	Proinflammatory		protein_coding	diacylglycerol kinase alpha
ENSMFAG00000038312	DENR	-0.278533	0.0130575			protein_coding	density regulated re-initiation and release factor
ENSMFAG00000041921	SSR4	-0.24826	0.0130575			protein_coding	signal sequence receptor subunit 4
ENSMFAG00000004546	PRR7	0.503107	0.0130622			protein_coding	proline rich 7, synaptic
ENSMFAG00000044037	SH3GL1	0.162279	0.0130747			protein_coding	SH3 domain containing GRB2 like 1, endophilin A2
ENSMFAG00000001544	CLTB	-0.146635	0.0130974			protein_coding	clathrin light chain B
ENSMFAG00000045357	SMG5	0.20358	0.0130974			protein_coding	SMG5 nonsense mediated mRNA decay factor
ENSMFAG00000031607	ZNF407	0.397873	0.0131484			protein_coding	zinc finger protein 407
ENSMFAG00000035642	CDKAL1	0.289116	0.0131524			protein_coding	CDK5 regulatory subunit associated protein 1 like 1
ENSMFAG00000045939	C6orf223	0.951099	0.0131536			protein_coding	chromosome 6 open reading frame 223
ENSMFAG00000045843	TEX264	-0.215328	0.013165			protein_coding	testis expressed 264, ER-phagy receptor
ENSMFAG00000002854		-0.559248	0.013209			protein_coding
ENSMFAG00000021156	RF00015	0.453397	0.013211			snRNA	U4 spliceosomal RNA
ENSMFAG00000039396	TMEM192	-0.33371	0.013211			protein_coding	transmembrane protein 192
ENSMFAG00000000225	PARP6	0.133307	0.0132175			protein_coding	poly(ADP-ribose) polymerase family member 6
ENSMFAG00000003522	WDFY4	0.38162	0.0132175			protein_coding	WDFY family member 4
ENSMFAG00000045320	INTS1	0.341786	0.0132175			protein_coding	integrator complex subunit 1
ENSMFAG00000046130	ZNF273	-0.443495	0.0132175			protein_coding	zinc finger protein 273
ENSMFAG00000000851	ANP32E	-0.285394	0.0132216	Proinflammatory		protein_coding	acidic nuclear phosphoprotein 32 family member E
ENSMFAG00000029000		-0.44823	0.0132216			protein_coding
ENSMFAG00000038636		-0.250533	0.0132216			pseudogene
ENSMFAG00000040078	PLEKHA8	0.404837	0.0132521			protein_coding	pleckstrin homology domain containing A8
ENSMFAG00000000405	MYDGF	-0.199693	0.0132529			protein_coding	myeloid derived growth factor
ENSMFAG00000001344	UBA6	-0.184914	0.0132529			protein_coding	ubiquitin like modifier activating enzyme 6
ENSMFAG00000001733		-0.146594	0.0132529			protein_coding	vacuolar protein sorting 4 homolog A
ENSMFAG00000002660	CCDC97	0.409379	0.0132529			protein_coding	coiled-coil domain containing 97
ENSMFAG00000014533	RF00026	1.1074	0.0132529			snRNA	U6 spliceosomal RNA
ENSMFAG00000019633	TRIM3	0.344136	0.0132529			protein_coding	tripartite motif containing 3
ENSMFAG00000030090	PKN2	0.292125	0.0132529			protein_coding	protein kinase N2
ENSMFAG00000031963	LENG8	0.447668	0.0132529	Proinflammatory		protein_coding	leukocyte receptor cluster member 8
ENSMFAG00000033183	BTBD19	0.88647	0.0132529			protein_coding	BTB domain containing 19
ENSMFAG00000033688	RAB7A	-0.148438	0.0132529			protein_coding	RAB7A, member RAS oncogene family
ENSMFAG00000037354	SYVN1	0.200279	0.0132529			protein_coding	synoviolin 1
ENSMFAG00000038150	PPP1R7	-0.304696	0.0132529			protein_coding	protein phosphatase 1 regulatory subunit 7
ENSMFAG00000039274	RBBP4	-0.309383	0.0132529			protein_coding	RB binding protein 4, chromatin remodeling factor
ENSMFAG00000039787	GFER	-0.178295	0.0132529			protein_coding	growth factor, augmenter of liver regeneration
ENSMFAG00000041955	ENO1	-0.290715	0.0132529			protein_coding	enolase 1
ENSMFAG00000042088	XYLT1	0.453719	0.0132529			protein_coding	xylosyltransferase 1
ENSMFAG00000042499	PDCL	-0.279118	0.0132529			protein_coding	phosducin like
ENSMFAG00000043812	GHITM	-0.313219	0.0132529			protein_coding	growth hormone inducible transmembrane protein
ENSMFAG00000044844	TMED7	-0.346436	0.0132529			protein_coding	transmembrane p24 trafficking protein 7
ENSMFAG00000046112	PLK1	0.401519	0.0132529			protein_coding	polo like kinase 1
ENSMFAG00000002185	SELENOF	-0.318119	0.0133559			protein_coding	selenoprotein F
ENSMFAG00000002428	TNFSF10	-0.606798	0.0133559			protein_coding	TNF superfamily member 10
ENSMFAG00000029997	CCDC69	-0.309584	0.0133559	Proinflammatory		protein_coding	coiled-coil domain containing 69
ENSMFAG00000037079	MKNK2	0.174939	0.0133559			protein_coding	MAPK interacting serine/threonine kinase 2
ENSMFAG00000039218	ANAPC2	0.181715	0.0133559			protein_coding	anaphase promoting complex subunit 2
ENSMFAG00000045169	LRCH3	0.306132	0.0133559			protein_coding	leucine rich repeats and calponin homology domain containing 3
ENSMFAG00000002805	POLG2	0.550331	0.0133674			protein_coding	DNA polymerase gamma 2, accessory subunit
ENSMFAG00000023435	RF02143	1.12385	0.0133674			misc_RNA
ENSMFAG00000027007	MEA1	-0.196476	0.0133674			protein_coding	male-enhanced antigen 1
ENSMFAG00000038375		-0.353535	0.0133674			protein_coding
ENSMFAG00000000056		-0.237499	0.0133677			protein_coding
ENSMFAG00000000720	PRRC2A	0.204696	0.0133677	Proinflammatory		protein_coding	proline rich coiled-coil 2A
ENSMFAG00000001324	PRMT5	-0.289055	0.0133677			protein_coding	protein arginine methyltransferase 5
ENSMFAG00000001559		0.732419	0.0133677			protein_coding
ENSMFAG00000002288	UBE2L6	-0.599063	0.0133677			protein_coding	ubiquitin conjugating enzyme E2 L6
ENSMFAG00000008222	RF00019	1.07421	0.0133677			misc_RNA	Y RNA
ENSMFAG00000014205	RCVRN	0.588407	0.0133677			protein_coding	recoverin
ENSMFAG00000021539	RF00017	1.10998	0.0133677			misc_RNA	Metazoan signal recognition particle RNA
ENSMFAG00000029387	PRDX1	-0.399468	0.0133677			protein_coding	peroxiredoxin 1
ENSMFAG00000030787	TWF2	-0.19778	0.0133677			protein_coding	twinfilin actin binding protein 2
ENSMFAG00000033189		0.34814	0.0133677			protein_coding	chimerin 2
ENSMFAG00000033246	POLDIP2	-0.26917	0.0133677			protein_coding	DNA polymerase delta interacting protein 2
ENSMFAG00000033956	DENND6B	0.398266	0.0133677			protein_coding	DENN domain containing 6B
ENSMFAG00000037064		0.257172	0.0133677			protein_coding	autophagy related 9A
ENSMFAG00000037804	ATP5MD	-0.334092	0.0133677			protein_coding	ATP synthase membrane subunit DAPIT
ENSMFAG00000041071	KLHL8	-0.27072	0.0133677			protein_coding	kelch like family member 8
ENSMFAG00000042793	MRPL44	-0.272054	0.0133677			protein_coding	mitochondrial ribosomal protein L44
ENSMFAG00000042947		1.14291	0.0133677			protein_coding
ENSMFAG00000043917	USP11	0.287182	0.0133677			protein_coding	ubiquitin specific peptidase 11
ENSMFAG00000044711	APOBEC3G	-0.373407	0.0133677			protein_coding	apolipoprotein B mRNA editing enzyme catalytic subunit 3G
ENSMFAG00000045024		-0.216413	0.0133677			protein_coding	ring finger protein, transmembrane 1
ENSMFAG00000000480	ARMCX4	0.585002	0.0133857			protein_coding	armadillo repeat containing X-linked 4
ENSMFAG00000003954	MPC1	-0.38246	0.0133857			protein_coding	mitochondrial pyruvate carrier 1
ENSMFAG00000018580	RF00017	1.12627	0.0133857			misc_RNA	Metazoan signal recognition particle RNA
ENSMFAG00000025927	UQCRB	-0.274794	0.0133857	Regulatory		protein_coding	ubiquinol-cytochrome c reductase binding protein
ENSMFAG00000030610	C14orf119	-0.324641	0.0133857			protein_coding	chromosome 14 open reading frame 119
ENSMFAG00000030626		0.997327	0.0133857			protein_coding
ENSMFAG00000039281		-0.289637	0.0133857			protein_coding	solute carrier family 25 member 32
ENSMFAG00000039611	LRRTM2	0.776413	0.0133857			protein_coding	leucine rich repeat transmembrane neuronal 2
ENSMFAG00000039777	KDM5C	0.246525	0.0133857			protein_coding	lysine demethylase 5C
ENSMFAG00000040553	ATPAF1	-0.293779	0.0133857			protein_coding	ATP synthase mitochondrial F1 complex assembly factor 1
ENSMFAG00000040822	CHMP2A	-0.181995	0.0133857			protein_coding	charged multivesicular body protein 2A
ENSMFAG00000041434	ARSA	0.239498	0.0133857			protein_coding	arylsulfatase A
ENSMFAG00000042455		-0.23109	0.0133857			protein_coding	jumping translocation breakpoint
ENSMFAG00000000298		-0.358439	0.0134088			protein_coding
ENSMFAG00000002505	DCTPP1	-0.325273	0.0134088			protein_coding	dCTP pyrophosphatase 1
ENSMFAG00000002865	POU2F1	0.27889	0.0134088			protein_coding	POU class 2 homeobox 1
ENSMFAG00000006615	RF02271	0.762921	0.0134088			misc_RNA
ENSMFAG00000030782	CD163	-0.244466	0.0134088	Proinflammatory		protein_coding	CD163 molecule
ENSMFAG00000032393	MROH1	0.376005	0.0134088			protein_coding	maestro heat like repeat family member 1
ENSMFAG00000035979	MAP7D1	0.19134	0.0134088	Proinflammatory		protein_coding	MAP7 domain containing 1
ENSMFAG00000038451	EMC4	-0.321001	0.0134088			protein_coding	ER membrane protein complex subunit 4
ENSMFAG00000045883	PRKD2	0.202695	0.0134088			protein_coding	protein kinase D2
ENSMFAG00000040309	ZMAT5	-0.300951	0.0134371			protein_coding	zinc finger matrin-type 5
ENSMFAG00000019688	RF00156	0.818482	0.0134627			snoRNA	Small nucleolar RNA SNORA70
ENSMFAG00000031244		0.447287	0.0134627			protein_coding
ENSMFAG00000033217	SLC35C1	0.281781	0.0134627			protein_coding	solute carrier family 35 member C1
ENSMFAG00000034167	SAP130	0.28847	0.0134627			protein_coding	Sin3A associated protein 130
ENSMFAG00000038463	MAGED2	-0.220915	0.0134627			protein_coding	MAGE family member D2
ENSMFAG00000039376		-0.264578	0.0134627			protein_coding	peroxisomal membrane protein 4
ENSMFAG00000001511		0.701374	0.0134878			protein_coding
ENSMFAG00000002698	OSTM1	-0.293764	0.0134878			protein_coding	osteoclastogenesis associated transmembrane protein 1
ENSMFAG00000013149	MIR320C2	1.01068	0.0134878			miRNA	microRNA 320c-2
ENSMFAG00000031354	ATG2B	0.214791	0.0134878			protein_coding	autophagy related 2B
ENSMFAG00000031503	OBSCN	0.923118	0.0134878			protein_coding	obscurin, cytoskeletal calmodulin and titin-interacting RhoGEF
ENSMFAG00000032604	ERLEC1	-0.262731	0.0134878			protein_coding	endoplasmic reticulum lectin 1
ENSMFAG00000032775	DUSP28	0.964443	0.0134878			protein_coding	dual specificity phosphatase 28
ENSMFAG00000033154	BEST1	0.698405	0.0134878			protein_coding	bestrophin 1
ENSMFAG00000036325	CCDC82	-0.239004	0.0134878			protein_coding	coiled-coil domain containing 82
ENSMFAG00000040180	SNX17	-0.280865	0.0134878			protein_coding	sorting nexin 17
ENSMFAG00000000484	NDUFB10	-0.247117	0.0135057			protein_coding	NADH:ubiquinone oxidoreductase subunit B10
ENSMFAG00000046055	ZNF367	0.452479	0.0135057			protein_coding	zinc finger protein 367
ENSMFAG00000035393	ASNA1	-0.226597	0.0135296			protein_coding	guided entry of tail-anchored proteins factor 3, ATPase
ENSMFAG00000044460	VPS13D	0.393232	0.0135296			protein_coding	vacuolar protein sorting 13 homolog D
ENSMFAG00000003703		-0.22629	0.0135299			protein_coding	PRELI domain containing 1
ENSMFAG00000000705	ZBTB37	0.339583	0.0135396			protein_coding	zinc finger and BTB domain containing 37
ENSMFAG00000000928	GGA3	0.237896	0.0135396			protein_coding	golgi associated, gamma adaptin ear containing, ARF binding protein 3
ENSMFAG00000031265	RNF169	0.24649	0.0135396			protein_coding	ring finger protein 169
ENSMFAG00000035493	MBD5	0.36401	0.0135396			protein_coding	methyl-CpG binding domain protein 5
ENSMFAG00000037276	MAPK8IP3	0.461644	0.0135396	Proinflammatory		protein_coding	mitogen-activated protein kinase 8 interacting protein 3
ENSMFAG00000042718		1.07949	0.0135396			miRNA
ENSMFAG00000045853	ANXA5	-0.38218	0.0135396			protein_coding	annexin A5
ENSMFAG00000046349	CNOT4	0.227749	0.0135396			protein_coding	CCR4-NOT transcription complex subunit 4
ENSMFAG00000031194	LSM4	-0.283982	0.0135472			protein_coding	LSM4 homolog, U6 small nuclear RNA and mRNA degradation associated
ENSMFAG00000037915	CNNM2	0.404985	0.0135475			protein_coding	cyclin and CBS domain divalent metal cation transport mediator 2
ENSMFAG00000000309	HDGFL2	0.108853	0.0135479			protein_coding	HDGF like 2
ENSMFAG00000002983	CAGE1	1.25941	0.0135479			protein_coding	cancer antigen 1
ENSMFAG00000032255	NARS	-0.319471	0.0135479	Proinflammatory		protein_coding	asparaginyl-tRNA synthetase
ENSMFAG00000042220	NDUFB5	-0.386841	0.0135479			protein_coding	NADH:ubiquinone oxidoreductase subunit B5
ENSMFAG00000000533	ARHGAP42	0.659975	0.0135831			protein_coding	Rho GTPase activating protein 42
ENSMFAG00000041596	YME1L1	-0.14386	0.0135831			protein_coding	YME1 like 1 ATPase
ENSMFAG00000038532	RALB	-0.238762	0.0135988			protein_coding	Macaca fascicularis RAS like proto-oncogene B (RALB), mRNA.
ENSMFAG00000002309	AARS	-0.216701	0.0136025			protein_coding	alanyl-tRNA synthetase
ENSMFAG00000002947	SAR1B	-0.20296	0.0136025			protein_coding	secretion associated Ras related GTPase 1B
ENSMFAG00000003138	ARPC1A	-0.218943	0.0136025			protein_coding	actin related protein 2/3 complex subunit 1A
ENSMFAG00000025111	NXPE3	-0.265769	0.0136025			protein_coding	neurexophilin and PC-esterase domain family member 3
ENSMFAG00000027526	NDUFS5	-0.212707	0.0136025			protein_coding	NADH:ubiquinone oxidoreductase subunit S5
ENSMFAG00000031560	PPP3R1	-0.179062	0.0136025	Proinflammatory		protein_coding	protein phosphatase 3 regulatory subunit B, alpha
ENSMFAG00000032818	HTATIP2	-0.291823	0.0136025			protein_coding	HIV-1 Tat interactive protein 2
ENSMFAG00000032899		0.460497	0.0136025			protein_coding
ENSMFAG00000036935	NOP58	-0.154897	0.0136025			protein_coding	NOP58 ribonucleoprotein
ENSMFAG00000039889	COPS7B	-0.227421	0.0136025			protein_coding	COP9 signalosome subunit 7B
ENSMFAG00000042907	ABCC2	0.899473	0.0136025			protein_coding	ATP binding cassette subfamily C member 2
ENSMFAG00000000419		0.599384	0.0136135			protein_coding	purine nucleoside phosphorylase
ENSMFAG00000036109	TMEM30A	-0.26514	0.0136135	Proinflammatory		protein_coding	transmembrane protein 30A
ENSMFAG00000039077	PSME2	-0.538027	0.0136135			protein_coding	proteasome activator subunit 2
ENSMFAG00000043168	HSPA2	1.33292	0.0136135			protein_coding	heat shock protein family A (Hsp70) member 2
ENSMFAG00000043217		-0.521984	0.0136135			protein_coding
ENSMFAG00000025107	SLC35B1	-0.208906	0.0136394			protein_coding	solute carrier family 35 member B1
ENSMFAG00000030312	QRICH1	0.111819	0.0136394			protein_coding	glutamine rich 1
ENSMFAG00000031008	PRDM10	0.29695	0.0136394			protein_coding	PR/SET domain 10
ENSMFAG00000032655	ACADM	-0.286479	0.0136394			protein_coding	acyl-CoA dehydrogenase medium chain
ENSMFAG00000006255	MIR5047	0.366443	0.0136715			miRNA	microRNA 5047
ENSMFAG00000030051	C1orf74	0.80113	0.0136715			protein_coding	chromosome 1 open reading frame 74
ENSMFAG00000002515	RPS21	-0.279285	0.0137119			protein_coding	ribosomal protein S21
ENSMFAG00000003357	CAPG	-0.330775	0.0137119	Proinflammatory		protein_coding	capping actin protein, gelsolin like
ENSMFAG00000031038	VAMP7	-0.33072	0.0137119			protein_coding	vesicle associated membrane protein 7
ENSMFAG00000032211	DGKZ	0.224889	0.0137119	Proinflammatory		protein_coding	diacylglycerol kinase zeta
ENSMFAG00000033482	ARGLU1	0.168264	0.0137119	Proinflammatory		protein_coding	arginine and glutamate rich 1
ENSMFAG00000037882	ZBTB17	0.231235	0.0137119			protein_coding	zinc finger and BTB domain containing 17
ENSMFAG00000013555		0.928087	0.0137366			miRNA
ENSMFAG00000037936	BRMS1L	0.236935	0.0137366			protein_coding	BRMS1 like transcriptional repressor
ENSMFAG00000045776		0.896973	0.0137366			protein_coding
ENSMFAG00000042377		-0.185859	0.0137761			pseudogene
ENSMFAG00000029358	ARCN1	-0.249194	0.0137923			protein_coding	archain 1
ENSMFAG00000030601	DENND4A	0.380197	0.0137923	Proinflammatory		protein_coding	DENN domain containing 4A
ENSMFAG00000031797	DIP2B	0.341997	0.0137923			protein_coding	disco interacting protein 2 homolog B
ENSMFAG00000032092	MED30	-0.204146	0.0137923			protein_coding	mediator complex subunit 30
ENSMFAG00000033687	POLR2F	-0.265382	0.0137923			protein_coding	RNA polymerase II subunit F
ENSMFAG00000039924	RPS10	-0.237611	0.0137923			protein_coding	ribosomal protein S10
ENSMFAG00000040776	BANF1	-0.212894	0.0137923			protein_coding	barrier to autointegration factor 1
ENSMFAG00000045919	ATAD2B	0.260056	0.0137923			protein_coding	ATPase family AAA domain containing 2B
ENSMFAG00000046424	ND4	0.460245	0.0137923			protein_coding	NADH dehydrogenase subunit 4
ENSMFAG00000009747	RF00019	1.03716	0.0137945			misc_RNA	Y RNA
ENSMFAG00000001501	STK24	-0.139808	0.0138223			protein_coding	serine/threonine kinase 24
ENSMFAG00000000216	ZSCAN29	-0.268774	0.0138224			protein_coding	zinc finger and SCAN domain containing 29
ENSMFAG00000042789	BTBD9	0.399097	0.0138224			protein_coding	BTB domain containing 9
ENSMFAG00000002306	HECTD4	0.358683	0.0138422			protein_coding	HECT domain E3 ubiquitin protein ligase 4
ENSMFAG00000034393	SLCO3A1	0.24562	0.0138517	Proinflammatory		protein_coding	solute carrier organic anion transporter family member 3A1
ENSMFAG00000034449	GNPDA2	-0.256677	0.0138719			protein_coding	glucosamine-6-phosphate deaminase 2
ENSMFAG00000000876	SFXN5	0.305089	0.0139054			protein_coding	sideroflexin 5
ENSMFAG00000005294	RF00016	0.620114	0.0139054			snoRNA	Small nucleolar RNA SNORD14
ENSMFAG00000010704	RF00017	1.02415	0.0139054			misc_RNA	Metazoan signal recognition particle RNA
ENSMFAG00000035513		0.798448	0.0139054			protein_coding
ENSMFAG00000040746		-0.32113	0.0139054			protein_coding	protein-L-isoaspartate (D-aspartate) O-methyltransferase
ENSMFAG00000044415	TM9SF2	-0.259082	0.0139554			protein_coding	transmembrane 9 superfamily member 2
ENSMFAG00000040255		0.684037	0.0139624			protein_coding
ENSMFAG00000044591		0.312115	0.0139645			protein_coding	myeloid zinc finger 1
ENSMFAG00000025156	RNF122	0.53008	0.0139737	Regulatory		protein_coding	ring finger protein 122
ENSMFAG00000033510	RF00019	0.734047	0.0139737			misc_RNA	Y RNA
ENSMFAG00000034949	RF00026	1.04737	0.0139737			snRNA	U6 spliceosomal RNA
ENSMFAG00000005186	RF00026	1.09318	0.0139835			snRNA	U6 spliceosomal RNA
ENSMFAG00000037300	KCTD18	-0.223391	0.0139899			protein_coding	potassium channel tetramerization domain containing 18
ENSMFAG00000003546	KIAA0319L	0.346406	0.0140109			protein_coding	KIAA0319 like
ENSMFAG00000015716	RF00091	1.03991	0.0140109			snoRNA	Small nucleolar RNA SNORA62/SNORA6 family
ENSMFAG00000032992	SQSTM1	0.328455	0.0140109			protein_coding	sequestosome 1
ENSMFAG00000040144		-0.176502	0.0140109			protein_coding	thyroid hormone receptor associated protein 3
ENSMFAG00000043034	LONRF3	0.607525	0.0140109			protein_coding	LON peptidase N-terminal domain and ring finger 3
ENSMFAG00000044538		-0.285502	0.0140109			protein_coding	GrpE like 2, mitochondrial
ENSMFAG00000045119	NR2C2	0.400018	0.0140109			protein_coding	nuclear receptor subfamily 2 group C member 2
ENSMFAG00000045724	CHAMP1	-0.267331	0.0140109			protein_coding	chromosome alignment maintaining phosphoprotein 1
ENSMFAG00000000275	AIFM1	-0.254227	0.0140139			protein_coding	apoptosis inducing factor mitochondria associated 1
ENSMFAG00000002588	PSMB7	-0.25776	0.0140139			protein_coding	Macaca fascicularis proteasome subunit beta 7 (PSMB7), mRNA.
ENSMFAG00000018901	COG1	0.190767	0.0140139			protein_coding	component of oligomeric golgi complex 1
ENSMFAG00000033952		-0.308595	0.0140139			protein_coding	chaperonin containing TCP1 subunit 6A
ENSMFAG00000039690	MUM1	0.268824	0.0140139			protein_coding	PWWP domain containing 3A, DNA repair factor
ENSMFAG00000041358	CLCN2	0.467637	0.0140139			protein_coding	chloride voltage-gated channel 2
ENSMFAG00000043639	RAPGEF2	0.269964	0.0140139			protein_coding	Rap guanine nucleotide exchange factor 2
ENSMFAG00000044054	PSMC5	-0.187878	0.0140139			protein_coding	proteasome 26S subunit, ATPase 5
ENSMFAG00000044167	ZMPSTE24	-0.331044	0.0140139			protein_coding	zinc metallopeptidase STE24
ENSMFAG00000046039		0.61292	0.0140139			protein_coding
ENSMFAG00000046294	MPC2	-0.304043	0.0140139			protein_coding	mitochondrial pyruvate carrier 2
ENSMFAG00000002978	PICALM	-0.162395	0.014019	Proinflammatory		protein_coding	phosphatidylinositol binding clathrin assembly protein
ENSMFAG00000008386		-0.313048	0.014019			protein_coding
ENSMFAG00000030620	PDF	-0.195999	0.014019			protein_coding	peptide deformylase, mitochondrial
ENSMFAG00000033083	FNDC3B	0.407382	0.014019	Proinflammatory		protein_coding	fibronectin type III domain containing 3B
ENSMFAG00000034251	MCAT	-0.331805	0.014019			protein_coding	malonyl-CoA-acyl carrier protein transacylase
ENSMFAG00000041238	TMEM248	-0.267559	0.014019			protein_coding	transmembrane protein 248
ENSMFAG00000043186	CLNS1A	-0.251453	0.014019			protein_coding	chloride nucleotide-sensitive channel 1A
ENSMFAG00000001053	DSTN	-0.279875	0.0140362	Regulatory		protein_coding	destrin, actin depolymerizing factor
ENSMFAG00000030738	SLFN12	0.271529	0.0140362			protein_coding	schlafen family member 12
ENSMFAG00000035863	GPN1	-0.304679	0.0140505			protein_coding	Macaca fascicularis GPN-loop GTPase 1 (GPN1), mRNA.
ENSMFAG00000031954	SLC25A27	0.348868	0.0140674			protein_coding	solute carrier family 25 member 27
ENSMFAG00000031860	CXCL14	1.21367	0.0140846			protein_coding	C-X-C motif chemokine ligand 14
ENSMFAG00000001581	DCTN2	-0.189654	0.0140893			protein_coding	dynactin subunit 2
ENSMFAG00000039842	PHACTR1	0.601886	0.0140893			protein_coding	phosphatase and actin regulator 1
ENSMFAG00000040006	RPLP2	-0.20572	0.0140893			protein_coding	ribosomal protein lateral stalk subunit P2
ENSMFAG00000045575	OPA3	0.45397	0.0140893			protein_coding	outer mitochondrial membrane lipid metabolism regulator OPA3
ENSMFAG00000035876	ITPKB	0.265122	0.0140957	Regulatory		protein_coding	inositol-trisphosphate 3-kinase B
ENSMFAG00000040738	SPCS1	-0.2855	0.0140973			protein_coding	signal peptidase complex subunit 1
ENSMFAG00000042888	SETD5	0.284116	0.0141021			protein_coding	SET domain containing 5
ENSMFAG00000037319	ZNF276	0.399331	0.0141163			protein_coding	zinc finger protein 276
ENSMFAG00000002630	HARS	-0.146931	0.0141321			protein_coding	histidyl-tRNA synthetase
ENSMFAG00000039307	ADSL	-0.258852	0.0141321			protein_coding	adenylosuccinate lyase
ENSMFAG00000035602	CCT8	-0.326937	0.014165			protein_coding	chaperonin containing TCP1 subunit 8
ENSMFAG00000027351		-0.210154	0.0141661			protein_coding	60S ribosomal protein L38
ENSMFAG00000000138	RPTOR	0.220447	0.0142018			protein_coding	regulatory associated protein of MTOR complex 1
ENSMFAG00000039422	NDOR1	0.307499	0.0142018			protein_coding	NADPH dependent diflavin oxidoreductase 1
ENSMFAG00000039762	QTRT2	-0.284422	0.0142018			protein_coding	queuine tRNA-ribosyltransferase accessory subunit 2
ENSMFAG00000043499	NDUFA8	-0.282426	0.0142119			protein_coding	NADH:ubiquinone oxidoreductase subunit A8
ENSMFAG00000003455	MRPL3	-0.285051	0.0142294			protein_coding	mitochondrial ribosomal protein L3
ENSMFAG00000029926	ARHGEF3	-0.340733	0.0142294			protein_coding	Rho guanine nucleotide exchange factor 3
ENSMFAG00000041603	AKR7A2	-0.379139	0.0142294			protein_coding	aldo-keto reductase family 7 member A2
ENSMFAG00000045541		-0.224673	0.0142294			protein_coding	cytochrome c oxidase assembly factor 3 homolog, mitochondrial
ENSMFAG00000001784	BCAT2	-0.40031	0.0142436			protein_coding	branched chain amino acid transaminase 2
ENSMFAG00000043247	PLCB1	0.359976	0.0142815	Proinflammatory		protein_coding	phospholipase C beta 1
ENSMFAG00000000198	ABHD16A	0.140178	0.0143006			protein_coding	abhydrolase domain containing 16A
ENSMFAG00000001356		0.427891	0.0143006			protein_coding
ENSMFAG00000001679	TMEM173	-0.207412	0.0143168			protein_coding	transmembrane protein 173
ENSMFAG00000039107	TMEM184C	-0.251694	0.0143221			protein_coding	transmembrane protein 184C
ENSMFAG00000043004	CYB5D1	0.47049	0.0143244			protein_coding	cytochrome b5 domain containing 1
ENSMFAG00000035613	LRRC49	0.436568	0.0143375			protein_coding	leucine rich repeat containing 49
ENSMFAG00000002478		-0.190177	0.0143489	Regulatory		protein_coding	H2A histone family member Z
ENSMFAG00000032162	RUVBL2	-0.150467	0.0143489			protein_coding	RuvB like AAA ATPase 2
ENSMFAG00000032332	CYBA	-0.214314	0.0143489			protein_coding	cytochrome b-245 alpha chain
ENSMFAG00000034297	LRCH4	0.198922	0.0143562			protein_coding	leucine rich repeats and calponin homology domain containing 4
ENSMFAG00000029263		0.762253	0.0143626			protein_coding
ENSMFAG00000008338	INTS3	0.25778	0.0143691			protein_coding	integrator complex subunit 3
ENSMFAG00000030257	IFT122	0.322271	0.0143759			protein_coding	intraflagellar transport 122
ENSMFAG00000030590	ATXN2L	0.207271	0.0143759	Proinflammatory		protein_coding	ataxin 2 like
ENSMFAG00000032245	RAP2C	-0.200629	0.0143759			protein_coding	RAP2C, member of RAS oncogene family
ENSMFAG00000032999	ERC1	0.454435	0.0143759	Proinflammatory		protein_coding	ELKS/RAB6-interacting/CAST family member 1
ENSMFAG00000046150	CRTC2	0.200294	0.0143759			protein_coding	CREB regulated transcription coactivator 2
ENSMFAG00000043836	TEDC1	0.184809	0.0143764			protein_coding	tubulin epsilon and delta complex 1
ENSMFAG00000032965	TAGAP	0.702422	0.0143809			protein_coding	T cell activation RhoGTPase activating protein
ENSMFAG00000000586	TULP2	1.03099	0.0143929			protein_coding	TUB like protein 2
ENSMFAG00000002143	CS	-0.283445	0.0143929			protein_coding	citrate synthase
ENSMFAG00000031962	GDE1	-0.340654	0.0143929			protein_coding	glycerophosphodiester phosphodiesterase 1
ENSMFAG00000033746	LMNB1	-0.510102	0.0143929	Proinflammatory		protein_coding	lamin B1
ENSMFAG00000044581	TMEM132A	0.729094	0.0143929			protein_coding	transmembrane protein 132A
ENSMFAG00000044666	MYO7A	0.512674	0.0143929			protein_coding	myosin VIIA
ENSMFAG00000046245		-0.352131	0.0143929			protein_coding	churchill domain containing 1
ENSMFAG00000046321	FIS1	-0.250598	0.0143929			protein_coding	fission, mitochondrial 1
ENSMFAG00000031817	TLE4	0.203558	0.0144004			protein_coding	TLE family member 4, transcriptional corepressor
ENSMFAG00000000044	FKBP3	-0.165308	0.01441			protein_coding	FKBP prolyl isomerase 3
ENSMFAG00000037268	VPS72	-0.232886	0.01441			protein_coding	vacuolar protein sorting 72 homolog
ENSMFAG00000041653	C11orf58	-0.252529	0.01441			protein_coding	chromosome 11 open reading frame 58
ENSMFAG00000035650	MAN2A2	0.343333	0.0144137			protein_coding	mannosidase alpha class 2A member 2
ENSMFAG00000043279		-0.215531	0.0144539			protein_coding	DEK proto-oncogene
ENSMFAG00000000443	RBM18	-0.175909	0.0144727			protein_coding	RNA binding motif protein 18
ENSMFAG00000031765		0.51469	0.0144727			protein_coding	coiled-coil and C2 domain containing 2B
ENSMFAG00000045969	EMC2	-0.223129	0.0144727			protein_coding	ER membrane protein complex subunit 2
ENSMFAG00000001677		0.938951	0.014524			protein_coding
ENSMFAG00000040143	MRAS	-0.449516	0.014524			protein_coding	muscle RAS oncogene homolog
ENSMFAG00000044702	SOCS7	0.236069	0.014524			protein_coding	suppressor of cytokine signaling 7
ENSMFAG00000001835	PCGF6	-0.340077	0.0145262			protein_coding	polycomb group ring finger 6
ENSMFAG00000029205	MGAT4B	0.225501	0.0145262			protein_coding	alpha-1,3-mannosyl-glycoprotein 4-beta-N-acetylglucosaminyltransferase B
ENSMFAG00000030025		0.257248	0.0145262			protein_coding	protein kinase C eta
ENSMFAG00000030479	ANXA2	-0.223131	0.0145262			protein_coding	annexin A2
ENSMFAG00000034305	DIP2A	0.366253	0.0145262			protein_coding	disco interacting protein 2 homolog A
ENSMFAG00000034721	ATP8B4	0.381179	0.0145262			protein_coding	ATPase phospholipid transporting 8B4 (putative)
ENSMFAG00000035729	SUPT16H	-0.21734	0.0145262			protein_coding	SPT16 homolog, facilitates chromatin remodeling subunit
ENSMFAG00000038169	TRAPPC3	-0.246669	0.0145262			protein_coding	trafficking protein particle complex 3
ENSMFAG00000038493	CUL5	-0.159759	0.0145262			protein_coding	cullin 5
ENSMFAG00000039300	SNX3	-0.202839	0.0145262			protein_coding	sorting nexin 3
ENSMFAG00000042927	CIC	0.361492	0.0145262			protein_coding	capicua transcriptional repressor
ENSMFAG00000043517	PAIP1	-0.217601	0.0145262			protein_coding	poly(A) binding protein interacting protein 1
ENSMFAG00000001238		-0.227953	0.0145796			pseudogene
ENSMFAG00000032886	COMMD4	-0.226891	0.0145796			protein_coding	COMM domain containing 4
ENSMFAG00000002809	CCR5	-0.427437	0.0145928			protein_coding	C-C motif chemokine receptor 5 (gene/pseudogene)
ENSMFAG00000038571		-0.25775	0.0145928			protein_coding	EF-hand calcium binding domain 14
ENSMFAG00000001673	PPP1R11	-0.269383	0.0146145			protein_coding	protein phosphatase 1 regulatory inhibitor subunit 11
ENSMFAG00000034542		-0.228683	0.0146145			protein_coding	ATP binding cassette subfamily F member 2
ENSMFAG00000038725	CD2BP2	-0.185475	0.0146145			protein_coding	CD2 cytoplasmic tail binding protein 2
ENSMFAG00000038500	AP1G2	0.268566	0.0146695			protein_coding	adaptor related protein complex 1 subunit gamma 2
ENSMFAG00000001337	HOMER1	0.495771	0.0147046			protein_coding	homer scaffold protein 1
ENSMFAG00000030390		-0.414398	0.0147046			protein_coding
ENSMFAG00000045580	AKIP1	-0.258494	0.0147046			protein_coding	A-kinase interacting protein 1
ENSMFAG00000040316	RAB8B	-0.237764	0.0147219	Proinflammatory		protein_coding	RAB8B, member RAS oncogene family
ENSMFAG00000027324	KBTBD7	0.515522	0.0147246			protein_coding	kelch repeat and BTB domain containing 7
ENSMFAG00000032617		0.905768	0.0147246			protein_coding
ENSMFAG00000041430	KIAA0930	-0.199382	0.0147246			protein_coding	KIAA0930 ortholog
ENSMFAG00000041784	SRSF4	0.132868	0.0147246			protein_coding	serine and arginine rich splicing factor 4
ENSMFAG00000002664	PYURF	-0.315575	0.0147642			protein_coding	PIGY upstream reading frame
ENSMFAG00000000674	TERF1	-0.250937	0.0148421			protein_coding	telomeric repeat binding factor 1
ENSMFAG00000003386	KIF5B	-0.209508	0.0148421			protein_coding	kinesin family member 5B
ENSMFAG00000007540	RF01984	0.508021	0.0148421			misc_RNA
ENSMFAG00000007607	NME1-NME2	-0.224751	0.0148421			protein_coding	NME1-NME2 readthrough
ENSMFAG00000037004	NUS1	-0.309793	0.0148421			protein_coding	NUS1 dehydrodolichyl diphosphate synthase subunit
ENSMFAG00000041324		-0.193562	0.0148421			protein_coding	pentatricopeptide repeat-containing protein 1, mitochondrial
ENSMFAG00000041594	ACTR3	-0.22823	0.0148421			protein_coding	actin related protein 3
ENSMFAG00000042897	TOR1AIP2	-0.20076	0.0148421			protein_coding	torsin 1A interacting protein 2
ENSMFAG00000043944	COPS8	-0.230125	0.0148421			protein_coding	COP9 signalosome subunit 8
ENSMFAG00000022462	TMEM168	-0.190642	0.0148668			protein_coding	transmembrane protein 168
ENSMFAG00000035517		-0.268634	0.0148668			protein_coding	small nuclear ribonucleoprotein polypeptide F
ENSMFAG00000036554	ABCC10	0.302123	0.0148668			protein_coding	ATP binding cassette subfamily C member 10
ENSMFAG00000041591	WDR82	-0.206063	0.0148668			protein_coding	WD repeat domain 82
ENSMFAG00000001700	PTRH1	0.268698	0.0148809			protein_coding	peptidyl-tRNA hydrolase 1 homolog
ENSMFAG00000002432	DLD	-0.259087	0.0148809			protein_coding	dihydrolipoamide dehydrogenase
ENSMFAG00000030436	REEP3	-0.252318	0.0148809			protein_coding	receptor accessory protein 3
ENSMFAG00000035408	ANAPC13	-0.257859	0.0148809			protein_coding	anaphase promoting complex subunit 13
ENSMFAG00000039988	SLC19A2	0.473607	0.0148809			protein_coding	solute carrier family 19 member 2
ENSMFAG00000002085	MBD6	0.376832	0.0149238	Proinflammatory		protein_coding	methyl-CpG binding domain protein 6
ENSMFAG00000018091	RF00100	0.975518	0.0149238			misc_RNA	7SK RNA
ENSMFAG00000035711	CCNG1	-0.358317	0.0149238			protein_coding	cyclin G1
ENSMFAG00000036719	MR1	-0.651669	0.0149238			protein_coding	major histocompatibility complex, class I-related
ENSMFAG00000035465	CMIP	0.215613	0.0149714	Proinflammatory		protein_coding	c-Maf inducing protein
ENSMFAG00000039094	STK26	-0.265701	0.015051			protein_coding	serine/threonine kinase 26
ENSMFAG00000000493	TMEM129	-0.228577	0.0150553			protein_coding	transmembrane protein 129
ENSMFAG00000002795	COA5	-0.26033	0.0150553			protein_coding	cytochrome c oxidase assembly factor 5
ENSMFAG00000035788	ARID1B	0.220316	0.0150892			protein_coding	AT-rich interaction domain 1B
ENSMFAG00000032768	RIC1	0.184319	0.0151189			protein_coding	RIC1 homolog, RAB6A GEF complex partner 1
ENSMFAG00000000064	MCMBP	-0.24408	0.0151369			protein_coding	minichromosome maintenance complex binding protein
ENSMFAG00000005329	RF00001	0.893976	0.0151369			rRNA	5S ribosomal RNA
ENSMFAG00000030487		-0.53674	0.0151369			protein_coding
ENSMFAG00000032083	HIF1A	0.30574	0.0151369	Proinflammatory		protein_coding	hypoxia inducible factor 1 subunit alpha
ENSMFAG00000039355	KIF20B	-0.202713	0.0151369			protein_coding	kinesin family member 20B
ENSMFAG00000011982		0.87167	0.0151461			miRNA
ENSMFAG00000033178	MECP2	0.208198	0.0151461			protein_coding	methyl-CpG binding protein 2
ENSMFAG00000032164	MN1	0.449396	0.0151468			protein_coding	MN1 proto-oncogene, transcriptional regulator
ENSMFAG00000035361	ADIPOR2	-0.30736	0.0151468			protein_coding	adiponectin receptor 2
ENSMFAG00000035375	UBR4	0.356339	0.0151468	Proinflammatory		protein_coding	ubiquitin protein ligase E3 component n-recognin 4
ENSMFAG00000042132		-0.21744	0.0151468			protein_coding	thioredoxin like 1
ENSMFAG00000027349	TMEM199	-0.36151	0.0151575			protein_coding	transmembrane protein 199
ENSMFAG00000044799	DGUOK	-0.198848	0.0151815			protein_coding	deoxyguanosine kinase
ENSMFAG00000044979	BTAF1	0.295545	0.0151815	Proinflammatory		protein_coding	B-TFIID TATA-box binding protein associated factor 1
ENSMFAG00000031366	VCPIP1	-0.202252	0.0152044			protein_coding	valosin containing protein interacting protein 1
ENSMFAG00000002241	C21orf91	-0.33701	0.0152401			protein_coding	chromosome 21 open reading frame 91
ENSMFAG00000044188		0.260094	0.0152401			protein_coding	zinc finger protein 682-like
ENSMFAG00000008108	RF00017	0.765293	0.0152616			misc_RNA	Metazoan signal recognition particle RNA
ENSMFAG00000039587	ACTRT3	0.548932	0.0152616			protein_coding	actin related protein T3
ENSMFAG00000040103	SVBP	-0.298734	0.0152616			protein_coding	small vasohibin binding protein
ENSMFAG00000001875	SYTL3	0.423461	0.0152716	Proinflammatory		protein_coding	synaptotagmin like 3
ENSMFAG00000002601	NAP1L4	-0.15021	0.0152716			protein_coding	nucleosome assembly protein 1 like 4
ENSMFAG00000038250	E4F1	0.238431	0.0153031			protein_coding	E4F transcription factor 1
ENSMFAG00000002124	ITPKC	0.625481	0.0153231			protein_coding	inositol-trisphosphate 3-kinase C
ENSMFAG00000014145	RF01210	0.653254	0.0153231			snoRNA	small nucleolar RNA, C/D box 13E
ENSMFAG00000030106	ARPC2	-0.217015	0.0153231			protein_coding	actin related protein 2/3 complex subunit 2
ENSMFAG00000030569	YOD1	0.29757	0.0153262			protein_coding	YOD1 deubiquitinase
ENSMFAG00000043602	ORMDL2	-0.249234	0.015341			protein_coding	ORMDL sphingolipid biosynthesis regulator 2
ENSMFAG00000033173	GGPS1	-0.251014	0.0153586			protein_coding	geranylgeranyl diphosphate synthase 1
ENSMFAG00000030045	PPP6C	-0.253795	0.0154011			protein_coding	protein phosphatase 6 catalytic subunit
ENSMFAG00000031441		0.329322	0.0154025			protein_coding	DEP domain containing 5
ENSMFAG00000004007		-0.204509	0.0154048			protein_coding	canopy FGF signaling regulator 2
ENSMFAG00000009115	LSM10	-0.138794	0.0154048			protein_coding	LSM10, U7 small nuclear RNA associated
ENSMFAG00000030061	THAP11	-0.170253	0.0154048			protein_coding	THAP domain containing 11
ENSMFAG00000032426	SURF1	-0.163687	0.0154048			protein_coding	SURF1 cytochrome c oxidase assembly factor
ENSMFAG00000032906	C2orf68	-0.250508	0.0154048			protein_coding	chromosome 2 open reading frame 68
ENSMFAG00000035989	SLC10A3	0.248185	0.0154048			protein_coding	solute carrier family 10 member 3
ENSMFAG00000036054	TEX54	1.06162	0.0154048			protein_coding	testis expressed 54
ENSMFAG00000041331	AFTPH	-0.119163	0.0154048			protein_coding	aftiphilin
ENSMFAG00000042331	ANKRD54	0.145255	0.0154048			protein_coding	ankyrin repeat domain 54
ENSMFAG00000030926	FCHO2	0.272106	0.015414			protein_coding	FCH domain only 2
ENSMFAG00000037104	DNAJB14	-0.148246	0.0154175			protein_coding	DnaJ heat shock protein family (Hsp40) member B14
ENSMFAG00000032196		-0.235428	0.0154257			protein_coding	caseinolytic mitochondrial matrix peptidase chaperone subunit
ENSMFAG00000033077	EFEMP2	0.301826	0.0154342			protein_coding	EGF containing fibulin extracellular matrix protein 2
ENSMFAG00000000045		-0.284725	0.0154482			protein_coding	ATPase H+ transporting V1 subunit A
ENSMFAG00000016607	CABLES2	0.299236	0.0154482			protein_coding	Cdk5 and Abl enzyme substrate 2
ENSMFAG00000021342	WDR89	-0.413052	0.0154482			protein_coding	WD repeat domain 89
ENSMFAG00000038349	UCHL5	-0.267575	0.0154482			protein_coding	ubiquitin C-terminal hydrolase L5
ENSMFAG00000038896	UGDH	-0.342007	0.0154482			protein_coding	UDP-glucose 6-dehydrogenase
ENSMFAG00000040198	SYNE3	0.322599	0.0154482			protein_coding	spectrin repeat containing nuclear envelope family member 3
ENSMFAG00000042967	IQCN	1.20312	0.0154482			protein_coding	IQ motif containing N
ENSMFAG00000044006	CORO1C	-0.184952	0.0154482			protein_coding	coronin 1C
ENSMFAG00000046126	SAE1	-0.249036	0.0154482			protein_coding	Macaca fascicularis SUMO1 activating enzyme subunit 1 (SAE1), mRNA.
ENSMFAG00000046408	ELMOD2	-0.322313	0.0154482			protein_coding	ELMO domain containing 2
ENSMFAG00000003155	C2orf49	-0.156178	0.0154741			protein_coding	chromosome 2 open reading frame 49
ENSMFAG00000043429	PRMT1	-0.156887	0.0155193			protein_coding	protein arginine methyltransferase 1
ENSMFAG00000001009	DAZAP2	-0.226509	0.0155307			protein_coding	DAZ associated protein 2
ENSMFAG00000004045		0.497131	0.0155307			protein_coding	transcription factor RelB-like
ENSMFAG00000008183	PTBP2	0.377026	0.0155307			protein_coding	polypyrimidine tract binding protein 2
ENSMFAG00000033089	NDUFS4	-0.240129	0.0155307			protein_coding	NADH:ubiquinone oxidoreductase subunit S4
ENSMFAG00000037245	MED15	0.203158	0.0155307			protein_coding	mediator complex subunit 15
ENSMFAG00000037811	EBP	-0.176001	0.0155307			protein_coding	EBP cholestenol delta-isomerase
ENSMFAG00000037957	RAPSN	0.600521	0.0155307			protein_coding	receptor associated protein of the synapse
ENSMFAG00000040106	GNB1	-0.223083	0.0155307			protein_coding	G protein subunit beta 1
ENSMFAG00000040630	SSRP1	-0.286088	0.0155307			protein_coding	structure specific recognition protein 1
ENSMFAG00000042476	POLG	0.177114	0.0155307			protein_coding	DNA polymerase gamma, catalytic subunit
ENSMFAG00000044837	GTF3A	-0.259035	0.0155307			protein_coding	general transcription factor IIIA
ENSMFAG00000000283	PLCG1	0.429333	0.0155626			protein_coding	phospholipase C gamma 1
ENSMFAG00000033854	TECPR2	0.361419	0.0155857			protein_coding	tectonin beta-propeller repeat containing 2
ENSMFAG00000033122	SF1	0.226824	0.0155945	Proinflammatory		protein_coding	splicing factor 1
ENSMFAG00000035905	CCT2	-0.181681	0.0155945			protein_coding	chaperonin containing TCP1 subunit 2
ENSMFAG00000002985	CRAMP1	0.360651	0.0156181			protein_coding	cramped chromatin regulator homolog 1
ENSMFAG00000003655	PPP3CA	-0.182231	0.0156181			protein_coding	protein phosphatase 3 catalytic subunit alpha
ENSMFAG00000031691	MRPL27	-0.192473	0.0156181			protein_coding	mitochondrial ribosomal protein L27
ENSMFAG00000032778	CYBRD1	-0.361069	0.0156181			protein_coding	cytochrome b reductase 1
ENSMFAG00000037532	GTPBP2	0.138207	0.0156181			protein_coding	GTP binding protein 2
ENSMFAG00000030515	CXorf21	-0.358843	0.0156251			protein_coding	chromosome X open reading frame 21
ENSMFAG00000037137	TMEM126B	-0.357579	0.0156578			protein_coding	transmembrane protein 126B
ENSMFAG00000043426	INSYN2B	0.623664	0.0156578			protein_coding	inhibitory synaptic factor family member 2B
ENSMFAG00000044552	NDUFV3	-0.216322	0.0156578			protein_coding	NADH:ubiquinone oxidoreductase subunit V3
ENSMFAG00000037013	CPSF1	0.217944	0.0156841			protein_coding	cleavage and polyadenylation specific factor 1
ENSMFAG00000000613	GNL3	-0.216113	0.0156965			protein_coding	G protein nucleolar 3
ENSMFAG00000000710	NUP37	-0.259891	0.0156965			protein_coding	nucleoporin 37
ENSMFAG00000001153	POLR3H	-0.16304	0.0156965			protein_coding	RNA polymerase III subunit H
ENSMFAG00000011567	RF01299	0.599232	0.0156965			snoRNA	small nucleolar RNA, C/D box 2
ENSMFAG00000026826		0.279	0.0156965			protein_coding	neuralized E3 ubiquitin protein ligase 4
ENSMFAG00000030713	SLC39A9	-0.195474	0.0156965			protein_coding	solute carrier family 39 member 9
ENSMFAG00000032562	STEAP4	-0.43632	0.0156965	Proinflammatory		protein_coding	STEAP4 metalloreductase
ENSMFAG00000033436	SMURF1	0.398541	0.0156965			protein_coding	SMAD specific E3 ubiquitin protein ligase 1
ENSMFAG00000033731	MYO19	0.331124	0.0156965			protein_coding	myosin XIX
ENSMFAG00000034137	APH1A	-0.269551	0.0156965			protein_coding	aph-1 homolog A, gamma-secretase subunit
ENSMFAG00000034247	ATG3	-0.24791	0.0156965			protein_coding	autophagy related 3
ENSMFAG00000034665	VPS13B	0.381324	0.0156965			protein_coding	vacuolar protein sorting 13 homolog B
ENSMFAG00000036078	FUK	0.330425	0.0156965			protein_coding	fucose kinase
ENSMFAG00000036172	XIAP	-0.141073	0.0156965			protein_coding	X-linked inhibitor of apoptosis
ENSMFAG00000036772	LAPTM4A	-0.283016	0.0156965			protein_coding	lysosomal protein transmembrane 4 alpha
ENSMFAG00000036957	STAT1	-0.58918	0.0156965			protein_coding	signal transducer and activator of transcription 1
ENSMFAG00000036965	G3BP1	-0.20552	0.0156965			protein_coding	G3BP stress granule assembly factor 1
ENSMFAG00000039123		0.631669	0.0156965			protein_coding
ENSMFAG00000042608	OFD1	0.299724	0.0156965			protein_coding	OFD1 centriole and centriolar satellite protein
ENSMFAG00000043016	SDHD	-0.310787	0.0156965			protein_coding	succinate dehydrogenase complex subunit D
ENSMFAG00000044360	TRMT6	-0.166935	0.0156965			protein_coding	tRNA methyltransferase 6
ENSMFAG00000046037	DYNC1I2	-0.286978	0.0156965			protein_coding	dynein cytoplasmic 1 intermediate chain 2
ENSMFAG00000001584	ARL6IP5	-0.358269	0.0157373			protein_coding	ADP ribosylation factor like GTPase 6 interacting protein 5
ENSMFAG00000007184	ATP5F1E	-0.213067	0.0157399			protein_coding	ATP synthase F1 subunit epsilon
ENSMFAG00000041391	UBA5	-0.214834	0.0157399			protein_coding	ubiquitin like modifier activating enzyme 5
ENSMFAG00000044746		0.836649	0.0157399			protein_coding
ENSMFAG00000038768	ZNF487	0.370155	0.0157483			protein_coding	zinc finger protein 487
ENSMFAG00000039557	ILF3	0.141128	0.0157483	Proinflammatory		protein_coding	interleukin enhancer binding factor 3
ENSMFAG00000002882	FAM32A	-0.201485	0.0157903			protein_coding	family with sequence similarity 32 member A
ENSMFAG00000025892	PAFAH1B1	-0.196096	0.0157903			protein_coding	platelet activating factor acetylhydrolase 1b regulatory subunit 1
ENSMFAG00000036066	GCLM	-0.272799	0.0157903			protein_coding	glutamate-cysteine ligase modifier subunit
ENSMFAG00000040581	KCTD2	-0.188323	0.0157903			protein_coding	potassium channel tetramerization domain containing 2
ENSMFAG00000021083	ATRAID	-0.330852	0.0157918			protein_coding	all-trans retinoic acid induced differentiation factor
ENSMFAG00000034233	DDX39B	0.209549	0.0158132			protein_coding	DExD-box helicase 39B
ENSMFAG00000043214	MRPL20	-0.316421	0.0158132			protein_coding	mitochondrial ribosomal protein L20
ENSMFAG00000031021	C6H5orf22	-0.208844	0.0158136			protein_coding	chromosome 6 open reading frame, human C5orf22
ENSMFAG00000041902	EPRS	-0.261015	0.0158136			protein_coding	glutamyl-prolyl-tRNA synthetase
ENSMFAG00000007626	PHC1	-0.257859	0.0158192			protein_coding	polyhomeotic homolog 1
ENSMFAG00000001520	TTBK2	0.207459	0.015832			protein_coding	tau tubulin kinase 2
ENSMFAG00000002860	MARCH8	-0.20958	0.015832			protein_coding	membrane associated ring-CH-type finger 8
ENSMFAG00000013942	RF00019	0.824792	0.015832			misc_RNA	Y RNA
ENSMFAG00000041362	ATG5	-0.115695	0.015832			protein_coding	autophagy related 5
ENSMFAG00000003555		-0.313236	0.0158522			protein_coding
ENSMFAG00000010169		-0.184756	0.0158522			protein_coding
ENSMFAG00000039246	NME6	-0.199418	0.0158522			protein_coding	NME/NM23 nucleoside diphosphate kinase 6
ENSMFAG00000041956		-0.290041	0.0158522			protein_coding	impact RWD domain protein
ENSMFAG00000046182	TRIM39	0.130055	0.0158522			protein_coding	tripartite motif containing 39
ENSMFAG00000030262	CNBP	-0.335045	0.0158579			protein_coding	CCHC-type zinc finger nucleic acid binding protein
ENSMFAG00000033632	CSRP1	-0.431539	0.0158579			protein_coding	cysteine and glycine rich protein 1
ENSMFAG00000032793	MARCH7	-0.147852	0.0159025			protein_coding	membrane associated ring-CH-type finger 7
ENSMFAG00000000461	PCNT	0.343247	0.015911			protein_coding	pericentrin
ENSMFAG00000001791	UBIAD1	-0.233355	0.015911			protein_coding	UbiA prenyltransferase domain containing 1
ENSMFAG00000005165	SEH1L	-0.260717	0.015911			protein_coding	SEH1 like nucleoporin
ENSMFAG00000011620		0.513785	0.015911			protein_coding
ENSMFAG00000040715	BRD9	0.172715	0.015911			protein_coding	bromodomain containing 9
ENSMFAG00000044124	OLA1	-0.223102	0.015911			protein_coding	Obg like ATPase 1
ENSMFAG00000046423	ND4L	1.01912	0.015911			protein_coding	NADH dehydrogenase subunit 4L
ENSMFAG00000003352	XRCC6	-0.258287	0.0159265			protein_coding	X-ray repair cross complementing 6
ENSMFAG00000003914	ANKRD40	-0.292189	0.0159265			protein_coding	ankyrin repeat domain 40
ENSMFAG00000006390	ZNF12	-0.276912	0.0159265			protein_coding	zinc finger protein 12
ENSMFAG00000031889	ICMT	-0.345498	0.0159265			protein_coding	isoprenylcysteine carboxyl methyltransferase
ENSMFAG00000038793	SDAD1	-0.291918	0.0159265			protein_coding	SDA1 domain containing 1
ENSMFAG00000040533		0.475108	0.0159265			protein_coding	inducible T cell costimulator ligand
ENSMFAG00000043888	CSTF2	-0.292375	0.0159265			protein_coding	cleavage stimulation factor subunit 2
ENSMFAG00000044393	CRLF3	-0.303233	0.0159265			protein_coding	cytokine receptor like factor 3
ENSMFAG00000044528	DDX46	-0.201739	0.0159265	Proinflammatory		protein_coding	DEAD-box helicase 46
ENSMFAG00000045887		-0.315165	0.0159265			protein_coding	pseudouridine 5'-phosphatase
ENSMFAG00000003980	GYPC	-0.366019	0.0159376			protein_coding	glycophorin C (Gerbich blood group)
ENSMFAG00000003982	PLPP5	0.293397	0.0159554			protein_coding	phospholipid phosphatase 5
ENSMFAG00000030939	TTC38	-0.462708	0.0159583			protein_coding	tetratricopeptide repeat domain 38
ENSMFAG00000036728	TXNDC12	-0.222713	0.0159583			protein_coding	thioredoxin domain containing 12
ENSMFAG00000037147	CLUAP1	-0.40625	0.0159583			protein_coding	clusterin associated protein 1
ENSMFAG00000038447	NFKBIL1	-0.199998	0.0159583			protein_coding	NFKB inhibitor like 1
ENSMFAG00000043596	POGZ	0.246964	0.0159714	Proinflammatory		protein_coding	pogo transposable element derived with ZNF domain
ENSMFAG00000041533	UQCRC1	-0.248017	0.0159917			protein_coding	ubiquinol-cytochrome c reductase core protein 1
ENSMFAG00000027229	ZADH2	-0.260489	0.0160045			protein_coding	zinc binding alcohol dehydrogenase domain containing 2
ENSMFAG00000038633	HSPA8	-0.409588	0.0160045			protein_coding	heat shock protein family A (Hsp70) member 8
ENSMFAG00000041827	VPS26C	-0.311268	0.0160045			protein_coding	VPS26 endosomal protein sorting factor C
ENSMFAG00000039359	PLK3	0.599119	0.0160186			protein_coding	polo like kinase 3
ENSMFAG00000045905	NNT	-0.290841	0.0160186			protein_coding	nicotinamide nucleotide transhydrogenase
ENSMFAG00000022085	LAPTM5	-0.240951	0.0160209	Proinflammatory		protein_coding	lysosomal protein transmembrane 5
ENSMFAG00000007224		-0.30615	0.01603			protein_coding	eukaryotic translation elongation factor 1 gamma
ENSMFAG00000030999	GSTT2	-0.384847	0.0160335			protein_coding	glutathione S-transferase theta 2
ENSMFAG00000000584	SNF8	-0.206588	0.0160393			protein_coding	SNF8 subunit of ESCRT-II
ENSMFAG00000039526	UNC119B	-0.274399	0.0160393			protein_coding	unc-119 lipid binding chaperone B
ENSMFAG00000041658	NLK	-0.235325	0.0160405			protein_coding	nemo like kinase
ENSMFAG00000003346		-0.24643	0.0160596			protein_coding	GABA type A receptor-associated protein
ENSMFAG00000032146	SMARCA4	0.196665	0.0160596			protein_coding	SWI/SNF related, matrix associated, actin dependent regulator of chromatin, subfamily a, member 4
ENSMFAG00000038010	PPP1CC	-0.316301	0.0160596			protein_coding	protein phosphatase 1 catalytic subunit gamma
ENSMFAG00000030289	MRPS35	-0.279136	0.0160627			protein_coding	mitochondrial ribosomal protein S35
ENSMFAG00000003394	SMG6	0.30527	0.0160883			protein_coding	SMG6 nonsense mediated mRNA decay factor
ENSMFAG00000036879	JARID2	0.310357	0.0160883	Proinflammatory		protein_coding	jumonji and AT-rich interaction domain containing 2
ENSMFAG00000040780	LPAR2	0.412423	0.0160883			protein_coding	lysophosphatidic acid receptor 2
ENSMFAG00000002470	IBA57	0.463612	0.0160916			protein_coding	iron-sulfur cluster assembly factor IBA57
ENSMFAG00000002409	BIVM-ERCC5	0.195621	0.0161197			protein_coding	BIVM-ERCC5 readthrough
ENSMFAG00000026128	YTHDF2	-0.113944	0.0161197			protein_coding	YTH N6-methyladenosine RNA binding protein 2
ENSMFAG00000034325	UTP18	-0.148631	0.0161197			protein_coding	UTP18 small subunit processome component
ENSMFAG00000034352		0.265509	0.0161197			protein_coding
ENSMFAG00000045161	SLC25A24	-0.248009	0.0161197			protein_coding	solute carrier family 25 member 24
ENSMFAG00000037029	SEC11C	-0.278203	0.0161308			protein_coding	SEC11 homolog C, signal peptidase complex subunit
ENSMFAG00000001464	IDE	-0.199382	0.0161354			protein_coding	insulin degrading enzyme
ENSMFAG00000001609	ETV3	0.201323	0.0161354			protein_coding	ETS variant 3
ENSMFAG00000023687	RF00282	0.641481	0.0161354			snoRNA	small nucleolar RNA, C/D box 48
ENSMFAG00000030582		-0.329386	0.0161354			protein_coding	60S ribosomal protein L10-like
ENSMFAG00000033884	CCR2	-0.381925	0.0161354	Proinflammatory		protein_coding	C-C motif chemokine receptor 2
ENSMFAG00000035506	VPS25	-0.257827	0.0161354			protein_coding	vacuolar protein sorting 25 homolog
ENSMFAG00000035834		-0.227248	0.0161354			protein_coding	mitochondrial ribosomal protein S22
ENSMFAG00000040134	BHLHE40	0.579036	0.0161354			protein_coding	basic helix-loop-helix family member e40
ENSMFAG00000040138	MAGI3	0.445555	0.0161354			protein_coding	membrane associated guanylate kinase, WW and PDZ domain containing 3
ENSMFAG00000040147	ERN1	0.253961	0.0161354			protein_coding	endoplasmic reticulum to nucleus signaling 1
ENSMFAG00000043969	CC2D1A	0.222874	0.0161354			protein_coding	coiled-coil and C2 domain containing 1A
ENSMFAG00000044220		0.177406	0.0161354			protein_coding	cyclin-dependent kinase 11B
ENSMFAG00000044667	NR1I3	0.691672	0.0161354			protein_coding	nuclear receptor subfamily 1 group I member 3
ENSMFAG00000045971	POLD4	-0.248653	0.0161354	Regulatory		protein_coding	DNA polymerase delta 4, accessory subunit
ENSMFAG00000031456	ASPH	-0.250533	0.0161364	Proinflammatory		protein_coding	aspartate beta-hydroxylase
ENSMFAG00000038790	RBBP5	-0.192441	0.0161382			protein_coding	RB binding protein 5, histone lysine methyltransferase complex subunit
ENSMFAG00000027428	LRSAM1	0.304009	0.0161495			protein_coding	leucine rich repeat and sterile alpha motif containing 1
ENSMFAG00000043102		0.661604	0.0161609			protein_coding
ENSMFAG00000001163		-0.319395	0.0161645			protein_coding
ENSMFAG00000026038	UNC13D	0.297889	0.0161645			protein_coding	unc-13 homolog D
ENSMFAG00000033014	SPAG4	0.541158	0.0161645			protein_coding	sperm associated antigen 4
ENSMFAG00000036766	PRR12	0.476995	0.016166	Proinflammatory		protein_coding	proline rich 12
ENSMFAG00000037250	RPL26	-0.224138	0.0161822			protein_coding	ribosomal protein L26
ENSMFAG00000031764		-0.20603	0.0162014			protein_coding	small nuclear ribonucleoprotein polypeptide C
ENSMFAG00000037724	KRTCAP2	-0.169093	0.0162014			protein_coding	keratinocyte associated protein 2
ENSMFAG00000046383	SNAPC5	-0.313545	0.0162014			protein_coding	small nuclear RNA activating complex polypeptide 5
ENSMFAG00000035890	UBQLNL	0.779777	0.0162032			protein_coding	ubiquilin like
ENSMFAG00000043486	USP47	0.122571	0.0162032			protein_coding	ubiquitin specific peptidase 47
ENSMFAG00000043641	MTX1	0.366159	0.0162032			protein_coding	metaxin 1
ENSMFAG00000043062	SMG1	0.296222	0.0162183			protein_coding	SMG1 nonsense mediated mRNA decay associated PI3K related kinase
ENSMFAG00000034615	AFF4	0.289622	0.0162299	Proinflammatory		protein_coding	AF4/FMR2 family member 4
ENSMFAG00000042127	SLC35A5	-0.25697	0.0162299			protein_coding	solute carrier family 35 member A5
ENSMFAG00000041919		-0.199594	0.0162353			protein_coding	cofilin 1
ENSMFAG00000046281	MRPL37	-0.31354	0.0162353			protein_coding	mitochondrial ribosomal protein L37
ENSMFAG00000031609	RBM5	0.225701	0.0162464	Proinflammatory		protein_coding	RNA binding motif protein 5
ENSMFAG00000038055	KDELR2	-0.291199	0.0162464			protein_coding	KDEL endoplasmic reticulum protein retention receptor 2
ENSMFAG00000042053	CHRNB1	-0.266896	0.0162464			protein_coding	cholinergic receptor nicotinic beta 1 subunit
ENSMFAG00000036839	DPM1	-0.198173	0.0162952			protein_coding	dolichyl-phosphate mannosyltransferase subunit 1, catalytic
ENSMFAG00000040352	SUGP2	0.240798	0.0162952			protein_coding	SURP and G-patch domain containing 2
ENSMFAG00000003544	PTEN	-0.18879	0.0162979			protein_coding	phosphatase and tensin homolog
ENSMFAG00000002609	MFAP3	-0.228691	0.0163011			protein_coding	microfibril associated protein 3
ENSMFAG00000006608		1.04123	0.0163011			miRNA
ENSMFAG00000018728	MIRLET7I	1.17149	0.0163011			miRNA	microRNA let-7i
ENSMFAG00000028211		-0.540954	0.0163011			protein_coding	40S ribosomal protein S27-like
ENSMFAG00000029752	ATXN1L	0.275467	0.0163011			protein_coding	ataxin 1 like
ENSMFAG00000032298	RER1	-0.112182	0.0163011			protein_coding	retention in endoplasmic reticulum sorting receptor 1
ENSMFAG00000032315	CLIC1	-0.184685	0.0163011	Proinflammatory		protein_coding	chloride intracellular channel 1
ENSMFAG00000034485	CD9	-0.569266	0.0163011			protein_coding	CD9 molecule
ENSMFAG00000042257	MAPKBP1	0.308301	0.0163011			protein_coding	mitogen-activated protein kinase binding protein 1
ENSMFAG00000046162	MPP1	-0.254583	0.0163202	Proinflammatory		protein_coding	membrane palmitoylated protein 1
ENSMFAG00000031623	RADX	0.51715	0.0163437			protein_coding	RPA1 related single stranded DNA binding protein, X-linked
ENSMFAG00000030531		-0.251231	0.0163481			protein_coding	succinate dehydrogenase complex assembly factor 3
ENSMFAG00000032583	RBM12	-0.205916	0.0163481			protein_coding	RNA binding motif protein 12
ENSMFAG00000045834	IKBIP	-0.313004	0.0163545			protein_coding	IKBKB interacting protein
ENSMFAG00000037078	NCOA3	0.177008	0.0163646			protein_coding	nuclear receptor coactivator 3
ENSMFAG00000036498	DES	-0.421945	0.0163708			protein_coding	desmin
ENSMFAG00000035043	RF00019	0.903157	0.0163988			misc_RNA	Y RNA
ENSMFAG00000014463		1.01225	0.0164215			miRNA
ENSMFAG00000044455	MYO1C	0.320042	0.0164215			protein_coding	myosin IC
ENSMFAG00000034372	EMC8	-0.16376	0.0164319			protein_coding	ER membrane protein complex subunit 8
ENSMFAG00000036817	ITM2B	-0.296729	0.0164771			protein_coding	integral membrane protein 2B
ENSMFAG00000034776	TBC1D12	0.36348	0.0164803			protein_coding	TBC1 domain family member 12
ENSMFAG00000041444	MRPL51	-0.265474	0.0164872			protein_coding	mitochondrial ribosomal protein L51
ENSMFAG00000001431	PCBP4	0.351498	0.0165			protein_coding	poly(rC) binding protein 4
ENSMFAG00000033199		-0.420128	0.0165			protein_coding
ENSMFAG00000044446	YY1AP1	0.144353	0.0165			protein_coding	YY1 associated protein 1
ENSMFAG00000007289	RF00015	0.937292	0.0165206			snRNA	U4 spliceosomal RNA
ENSMFAG00000033103	APMAP	-0.308679	0.016545			protein_coding	adipocyte plasma membrane associated protein
ENSMFAG00000041602		0.931262	0.016545			protein_coding
ENSMFAG00000042554		-0.350645	0.0165521			protein_coding	prohibitin
ENSMFAG00000030473	AP1S1	-0.250496	0.0165618			protein_coding	adaptor related protein complex 1 subunit sigma 1
ENSMFAG00000044701		0.65191	0.0165618			protein_coding
ENSMFAG00000037897	SCAMP1	-0.240425	0.0165668			protein_coding	secretory carrier membrane protein 1
ENSMFAG00000001228	TNRC18	0.321607	0.0165778	Proinflammatory		protein_coding	trinucleotide repeat containing 18
ENSMFAG00000034344	FBXO8	-0.198843	0.0165778			protein_coding	F-box protein 8
ENSMFAG00000034536	SLC39A6	-0.278624	0.0165778			protein_coding	solute carrier family 39 member 6
ENSMFAG00000041587	GABPA	-0.244337	0.0165778			protein_coding	GA binding protein transcription factor subunit alpha
ENSMFAG00000046103		-0.154064	0.0165778			protein_coding
ENSMFAG00000030656		0.437748	0.0166162			protein_coding	SH3 domain binding protein 5
ENSMFAG00000044368	PCNX3	0.272613	0.0166277			protein_coding	pecanex 3
ENSMFAG00000014934	RF00158	0.515636	0.0166389			snoRNA	Small nucleolar RNA SNORD82
ENSMFAG00000032884		0.430067	0.0166389			protein_coding	Snf2 related CREBBP activator protein
ENSMFAG00000042620		0.351741	0.0166389			protein_coding
ENSMFAG00000001493	EXOSC1	-0.228184	0.0166438			protein_coding	exosome component 1
ENSMFAG00000036437	ERP44	-0.162578	0.0166565			protein_coding	endoplasmic reticulum protein 44
ENSMFAG00000032661	LSM1	-0.170369	0.0167011			protein_coding	LSM1 homolog, mRNA degradation associated
ENSMFAG00000035731	GFM1	-0.220097	0.0167011			protein_coding	G elongation factor mitochondrial 1
ENSMFAG00000037031	KMT2B	0.338031	0.0167079			protein_coding	lysine methyltransferase 2B
ENSMFAG00000045159	SMIM14	-0.197259	0.0167079			protein_coding	small integral membrane protein 14
ENSMFAG00000045998	ANTXR2	0.241719	0.0167181	Proinflammatory		protein_coding	ANTXR cell adhesion molecule 2
ENSMFAG00000018634		-0.334476	0.0167198			protein_coding
ENSMFAG00000038318	LUZP1	0.226685	0.0167198			protein_coding	leucine zipper protein 1
ENSMFAG00000018980	PRPF4B	0.166314	0.0167199	Proinflammatory		protein_coding	pre-mRNA processing factor 4B
ENSMFAG00000039592	ST3GAL4	-0.272191	0.0167294			protein_coding	ST3 beta-galactoside alpha-2,3-sialyltransferase 4
ENSMFAG00000003241	GFOD1	0.463688	0.0167722			protein_coding	glucose-fructose oxidoreductase domain containing 1
ENSMFAG00000032834	RNF40	0.107359	0.0168023	Proinflammatory		protein_coding	ring finger protein 40
ENSMFAG00000001185		-0.276702	0.0168138			protein_coding	proteasome assembly chaperone 2
ENSMFAG00000037730		-0.332114	0.0168138			protein_coding	molybdenum cofactor synthesis 2
ENSMFAG00000043194	TSSK3	0.474727	0.0168399			protein_coding	testis specific serine kinase 3
ENSMFAG00000001901	CNEP1R1	-0.252402	0.016841			protein_coding	CTD nuclear envelope phosphatase 1 regulatory subunit 1
ENSMFAG00000041938	ULK1	0.425604	0.0168598			protein_coding	unc-51 like autophagy activating kinase 1
ENSMFAG00000002637	MRPL53	-0.180505	0.0168695			protein_coding	mitochondrial ribosomal protein L53
ENSMFAG00000041011		0.270816	0.0168695			protein_coding	zinc finger AN1-type containing 2A
ENSMFAG00000012951		-0.290637	0.0168709			protein_coding	haloacid dehalogenase like hydrolase domain containing 2
ENSMFAG00000031971		0.172247	0.0168795			protein_coding	sperm antigen with calponin homology and coiled-coil domains 1 like
ENSMFAG00000043717		-0.272753	0.0168795			protein_coding	glutamate dehydrogenase 1, mitochondrial
ENSMFAG00000043873	IQSEC1	0.337326	0.0168795			protein_coding	IQ motif and Sec7 domain 1
ENSMFAG00000000866	GOT2	-0.335794	0.0168816			protein_coding	glutamic-oxaloacetic transaminase 2
ENSMFAG00000034077	LMO4	-0.254562	0.0168816			protein_coding	LIM domain only 4
ENSMFAG00000002000	AMBRA1	0.291711	0.0169439			protein_coding	autophagy and beclin 1 regulator 1
ENSMFAG00000031283	SNRPB2	-0.2218	0.0169439			protein_coding	small nuclear ribonucleoprotein polypeptide B2
ENSMFAG00000036564	ABL2	0.337273	0.0169439			protein_coding	ABL proto-oncogene 2, non-receptor tyrosine kinase
ENSMFAG00000036759	CCDC86	-0.288273	0.0169439			protein_coding	coiled-coil domain containing 86
ENSMFAG00000037920	SELENOT	-0.267379	0.0169439			protein_coding	selenoprotein T
ENSMFAG00000037994	IQSEC2	0.543758	0.0169439	Proinflammatory		protein_coding	IQ motif and Sec7 domain 2
ENSMFAG00000042830	ANKRD13C	-0.126457	0.0169439			protein_coding	ankyrin repeat domain 13C
ENSMFAG00000042917	C11orf71	0.62014	0.0169439			protein_coding	chromosome 11 open reading frame 71
ENSMFAG00000043378		-0.444362	0.0169439			protein_coding	DDB1- and CUL4-associated factor 13-like
ENSMFAG00000032065	KCND1	0.61131	0.0169528			protein_coding	potassium voltage-gated channel subfamily D member 1
ENSMFAG00000033916	PPP1R12C	0.206937	0.0169548			protein_coding	protein phosphatase 1 regulatory subunit 12C
ENSMFAG00000001674	RAB10	-0.218111	0.0169617			protein_coding	RAB10, member RAS oncogene family
ENSMFAG00000002522	ZNF133	-0.335953	0.0169634			protein_coding	zinc finger protein 133
ENSMFAG00000002088	ELMO1	0.284749	0.0169636			protein_coding	engulfment and cell motility 1
ENSMFAG00000014792	SLC12A6	0.298994	0.0169636	Proinflammatory		protein_coding	solute carrier family 12 member 6
ENSMFAG00000018729	RF00100	0.349166	0.0169636			misc_RNA	7SK RNA
ENSMFAG00000037051	SLC24A3	0.274415	0.0169636			protein_coding	solute carrier family 24 member 3
ENSMFAG00000042183	NEK7	-0.242087	0.0169636			protein_coding	NIMA related kinase 7
ENSMFAG00000030975	AKAP13	0.311506	0.0169689	Proinflammatory		protein_coding	A-kinase anchoring protein 13
ENSMFAG00000031976	APOL4	-0.91617	0.0169689			protein_coding	apolipoprotein L4
ENSMFAG00000037837	MAP3K2	0.134594	0.0169689	Proinflammatory		protein_coding	mitogen-activated protein kinase kinase kinase 2
ENSMFAG00000045371	PTGES3	-0.238116	0.0169689	Regulatory		protein_coding	prostaglandin E synthase 3
ENSMFAG00000003781	CBFA2T3	0.373446	0.0169863			protein_coding	CBFA2/RUNX1 partner transcriptional co-repressor 3
ENSMFAG00000004034	RBM22	0.1376	0.0169863			protein_coding	RNA binding motif protein 22
ENSMFAG00000018709	DCPS	-0.239901	0.0169863			protein_coding	decapping enzyme, scavenger
ENSMFAG00000026470	ACP1	-0.276762	0.0169863			protein_coding	acid phosphatase 1
ENSMFAG00000030806	BRD4	0.421443	0.0169863			protein_coding	bromodomain containing 4
ENSMFAG00000031412	ENKD1	0.275735	0.0169863			protein_coding	enkurin domain containing 1
ENSMFAG00000033352	FYTTD1	-0.237589	0.0169863			protein_coding	forty-two-three domain containing 1
ENSMFAG00000034655	SLC27A1	0.329184	0.0169863			protein_coding	solute carrier family 27 member 1
ENSMFAG00000035330	HLA-E	-0.252746	0.0169863	Regulatory		protein_coding	major histocompatibility complex, class I, E
ENSMFAG00000036090	CYB5R4	-0.249565	0.0169863			protein_coding	cytochrome b5 reductase 4
ENSMFAG00000038592	ALMS1	0.30346	0.0169863			protein_coding	ALMS1 centrosome and basal body associated protein
ENSMFAG00000039386	KLHDC3	-0.20459	0.0169863			protein_coding	kelch domain containing 3
ENSMFAG00000042090	MDH1	-0.318443	0.0169863			protein_coding	malate dehydrogenase 1
ENSMFAG00000042581	RPS7	-0.259171	0.0169863			protein_coding	ribosomal protein S7
ENSMFAG00000042989	EI24	-0.298128	0.0169863			protein_coding	EI24 autophagy associated transmembrane protein
ENSMFAG00000043817	NIPSNAP3A	-0.320336	0.0169863			protein_coding	nipsnap homolog 3A
ENSMFAG00000043946	MRPL19	-0.306899	0.0169863			protein_coding	mitochondrial ribosomal protein L19
ENSMFAG00000046191	AP1AR	-0.277202	0.0169863			protein_coding	adaptor related protein complex 1 associated regulatory protein
ENSMFAG00000041807	MAPK7	0.358598	0.0169864			protein_coding	mitogen-activated protein kinase 7
ENSMFAG00000045455	TUBD1	-0.35906	0.0169864			protein_coding	tubulin delta 1
ENSMFAG00000000623	PSMD4	-0.247435	0.0169872			protein_coding	proteasome 26S subunit, non-ATPase 4
ENSMFAG00000042511	MTPN	-0.348124	0.0169907	Regulatory		protein_coding	myotrophin
ENSMFAG00000026832		-0.294894	0.0169917			protein_coding
ENSMFAG00000032281		0.473515	0.0169917			protein_coding
ENSMFAG00000032321	TSG101	-0.192895	0.0169917			protein_coding	tumor susceptibility 101
ENSMFAG00000042446	GCNT7	0.667299	0.0169917			protein_coding	glucosaminyl (N-acetyl) transferase family member 7
ENSMFAG00000046144	PITPNM1	0.26273	0.0170121			protein_coding	phosphatidylinositol transfer protein membrane associated 1
ENSMFAG00000043819	POMT2	0.301829	0.0170263			protein_coding	protein O-mannosyltransferase 2
ENSMFAG00000023313		-0.225254	0.0170578			protein_coding	mitochondrial ribosomal protein L58
ENSMFAG00000024049	RF00066	1.07029	0.0170633			snRNA	U7 small nuclear RNA
ENSMFAG00000042316	MOGS	-0.231216	0.0170633			protein_coding	mannosyl-oligosaccharide glucosidase
ENSMFAG00000043259	RTTN	0.352459	0.0170633			protein_coding	rotatin
ENSMFAG00000003778	KDM4C	0.235248	0.0170672			protein_coding	lysine demethylase 4C
ENSMFAG00000040919		-0.619927	0.0170672			protein_coding
ENSMFAG00000036941	DNAJC4	0.264986	0.017077			protein_coding	DnaJ heat shock protein family (Hsp40) member C4
ENSMFAG00000044965	RNASEL	-0.479246	0.0171054			protein_coding	ribonuclease L
ENSMFAG00000003676	CRKL	-0.207854	0.0171136			protein_coding	CRK like proto-oncogene, adaptor protein
ENSMFAG00000004688	RF00026	0.988862	0.0171136			snRNA	U6 spliceosomal RNA
ENSMFAG00000015528		1.03866	0.0171136			protein_coding
ENSMFAG00000039737	HNRNPR	-0.285394	0.0171136			protein_coding	heterogeneous nuclear ribonucleoprotein R
ENSMFAG00000033150	ATOX1	-0.193967	0.0171332			protein_coding	antioxidant 1 copper chaperone
ENSMFAG00000000293	MRPL47	-0.246194	0.0171496			protein_coding	mitochondrial ribosomal protein L47
ENSMFAG00000000648	FOPNL	-0.294336	0.0171496			protein_coding	FGFR1OP N-terminal like
ENSMFAG00000002612	VPS29	-0.160462	0.0171496			protein_coding	VPS29 retromer complex component
ENSMFAG00000002767	ATG2A	0.303886	0.0171496			protein_coding	autophagy related 2A
ENSMFAG00000003387	MED8	-0.261839	0.0171496			protein_coding	mediator complex subunit 8
ENSMFAG00000028779	WDR97	0.73985	0.0171496			protein_coding	WD repeat domain 97
ENSMFAG00000032249	L3MBTL1	0.574767	0.0171496			protein_coding	L3MBTL histone methyl-lysine binding protein 1
ENSMFAG00000032261	ARHGEF1	0.270487	0.0171496	Regulatory		protein_coding	Rho guanine nucleotide exchange factor 1
ENSMFAG00000033331		0.782579	0.0171496			pseudogene	calicin
ENSMFAG00000035178	RARRES3	-0.790231	0.0171496			protein_coding	phospholipase A and acyltransferase 4
ENSMFAG00000035753	SAMD4B	0.277565	0.0171496			protein_coding	sterile alpha motif domain containing 4B
ENSMFAG00000037057	CCDC115	-0.270207	0.0171496			protein_coding	coiled-coil domain containing 115
ENSMFAG00000039571	PCP2	0.302061	0.0171496			protein_coding	Purkinje cell protein 2
ENSMFAG00000040981	VPS52	0.334118	0.0171496			protein_coding	VPS52 subunit of GARP complex
ENSMFAG00000042241	FAAP100	0.174596	0.0171496			protein_coding	FA core complex associated protein 100
ENSMFAG00000042571	PA2G4	-0.236256	0.0171496			protein_coding	proliferation-associated 2G4
ENSMFAG00000042814	ATG12	-0.259278	0.0171496			protein_coding	autophagy related 12
ENSMFAG00000043095	FGFR1OP2	-0.253531	0.0171496			protein_coding	FGFR1 oncogene partner 2
ENSMFAG00000044077	TRIR	-0.123954	0.0171496			protein_coding	telomerase RNA component interacting RNase
ENSMFAG00000044362	NAT9	0.263134	0.0171496			protein_coding	N-acetyltransferase 9 (putative)
ENSMFAG00000000139	ARIH2	0.101461	0.0171504			protein_coding	ariadne RBR E3 ubiquitin protein ligase 2
ENSMFAG00000037498		0.781466	0.0171504			protein_coding	zinc finger protein 177
ENSMFAG00000038736	HPF1	-0.44516	0.0171504			protein_coding	histone PARylation factor 1
ENSMFAG00000044488	INO80	0.158855	0.0171504			protein_coding	INO80 complex ATPase subunit
ENSMFAG00000030869	GMPR2	-0.253556	0.0171598			protein_coding	guanosine monophosphate reductase 2
ENSMFAG00000034391	URB1	0.242151	0.0171598			protein_coding	URB1 ribosome biogenesis homolog
ENSMFAG00000038178	SF3B6	-0.196267	0.0171598			protein_coding	splicing factor 3b subunit 6
ENSMFAG00000031146	C11orf94	0.508926	0.0171736			protein_coding	chromosome 11 open reading frame 94
ENSMFAG00000000341	JMJD1C	0.339514	0.0171916	Proinflammatory		protein_coding	jumonji domain containing 1C
ENSMFAG00000001579	SCOC	-0.241073	0.0171916			protein_coding	short coiled-coil protein
ENSMFAG00000014163	RF00026	0.968415	0.0171916			snRNA	U6 spliceosomal RNA
ENSMFAG00000039687	YWHAE	-0.195404	0.0171916			protein_coding	tyrosine 3-monooxygenase/tryptophan 5-monooxygenase activation protein epsilon
ENSMFAG00000042370	CNIH1	-0.291919	0.0171971			protein_coding	cornichon family AMPA receptor auxiliary protein 1
ENSMFAG00000044654	NOLC1	-0.23319	0.0171971			protein_coding	nucleolar and coiled-body phosphoprotein 1
ENSMFAG00000001741	CENPP	0.649037	0.0171988			protein_coding	centromere protein P
ENSMFAG00000032455	TRMT10B	0.127518	0.0171988			protein_coding	tRNA methyltransferase 10B
ENSMFAG00000000730	BICRA	0.685078	0.0172038			protein_coding	BRD4 interacting chromatin remodeling complex associated protein
ENSMFAG00000045239	DNAAF2	0.366596	0.0172038			protein_coding	dynein axonemal assembly factor 2
ENSMFAG00000043947	PIGS	-0.237223	0.0172155			protein_coding	phosphatidylinositol glycan anchor biosynthesis class S
ENSMFAG00000000686	APPL1	-0.286394	0.0172317			protein_coding	adaptor protein, phosphotyrosine interacting with PH domain and leucine zipper 1
ENSMFAG00000001377	SIN3B	0.277944	0.0172574	Proinflammatory		protein_coding	SIN3 transcription regulator family member B
ENSMFAG00000045246	COPS4	-0.235011	0.0172574			protein_coding	COP9 signalosome subunit 4
ENSMFAG00000039366	FAM89A	-0.380923	0.017289			protein_coding	family with sequence similarity 89 member A
ENSMFAG00000000756	AURKAIP1	-0.159476	0.0173061			protein_coding	aurora kinase A interacting protein 1
ENSMFAG00000030130	SLBP	-0.185265	0.0173061			protein_coding	stem-loop binding protein
ENSMFAG00000030972	DIS3L2	0.378061	0.0173061			protein_coding	DIS3 like 3'-5' exoribonuclease 2
ENSMFAG00000001136	KAT5	0.14406	0.0173199			protein_coding	lysine acetyltransferase 5
ENSMFAG00000002298		-0.198981	0.0173428			protein_coding	protein phosphatase 2 regulatory subunit B'gamma
ENSMFAG00000033329	NCAPH2	0.18744	0.0173428			protein_coding	non-SMC condensin II complex subunit H2
ENSMFAG00000002271	KBTBD6	0.610172	0.0173454			protein_coding	kelch repeat and BTB domain containing 6
ENSMFAG00000044353	MANF	-0.275598	0.0173665			protein_coding	mesencephalic astrocyte derived neurotrophic factor
ENSMFAG00000033923	STK10	0.260248	0.0173695			protein_coding	serine/threonine kinase 10
ENSMFAG00000035688	ITPR2	0.292544	0.0173746			protein_coding	inositol 1,4,5-trisphosphate receptor type 2
ENSMFAG00000017384	RPL11	-0.246264	0.0174043			protein_coding	ribosomal protein L11
ENSMFAG00000036555	NFKB1	0.296463	0.0174176		Inflammatory	protein_coding	nuclear factor kappa B subunit 1
ENSMFAG00000029929	RBM15	0.174639	0.0174256			protein_coding	RNA binding motif protein 15
ENSMFAG00000045096	SIRT7	0.166265	0.0174278			protein_coding	sirtuin 7
ENSMFAG00000030546	C18orf32	-0.261972	0.0174398			protein_coding	chromosome 18 open reading frame 32
ENSMFAG00000000585	PTPN23	0.421025	0.0174597			protein_coding	protein tyrosine phosphatase non-receptor type 23
ENSMFAG00000040060	SSR2	-0.262482	0.0174597			protein_coding	signal sequence receptor subunit 2
ENSMFAG00000032305	INPP4A	0.192151	0.017469			protein_coding	inositol polyphosphate-4-phosphatase type I A
ENSMFAG00000046089	COQ6	-0.130839	0.017469			protein_coding	coenzyme Q6, monooxygenase
ENSMFAG00000041960	TMEM175	0.361566	0.0174846			protein_coding	transmembrane protein 175
ENSMFAG00000033174	ST8SIA4	-0.267235	0.0174887			protein_coding	ST8 alpha-N-acetyl-neuraminide alpha-2,8-sialyltransferase 4
ENSMFAG00000035748	ASF1A	-0.266639	0.0174887			protein_coding	anti-silencing function 1A histone chaperone
ENSMFAG00000039314	RNF4	-0.116078	0.0174999			protein_coding	ring finger protein 4
ENSMFAG00000006467	RF00066	1.08588	0.0175129			snRNA	U7 small nuclear RNA
ENSMFAG00000036768	CCP110	-0.229359	0.0175129			protein_coding	centriolar coiled-coil protein 110
ENSMFAG00000042603	PDSS1	0.261878	0.0175212			protein_coding	decaprenyl diphosphate synthase subunit 1
ENSMFAG00000043734	HAUS2	-0.308643	0.0175233			protein_coding	HAUS augmin like complex subunit 2
ENSMFAG00000002535		-0.22908	0.0175352			protein_coding	SET nuclear proto-oncogene
ENSMFAG00000003028	PSMC1	-0.174699	0.0175352			protein_coding	proteasome 26S subunit, ATPase 1
ENSMFAG00000034836	RF00004	0.263088	0.0175455			snRNA	U2 spliceosomal RNA
ENSMFAG00000001255	USP35	0.3087	0.0175497			protein_coding	ubiquitin specific peptidase 35
ENSMFAG00000002488	RAI1	0.340204	0.0175497			protein_coding	retinoic acid induced 1
ENSMFAG00000031841	NKIRAS2	-0.149937	0.0175497			protein_coding	NFKB inhibitor interacting Ras like 2
ENSMFAG00000045138	STAB1	0.509196	0.0175497	Proinflammatory		protein_coding	stabilin 1
ENSMFAG00000006430	RAB18	-0.226493	0.0175682			protein_coding	RAB18, member RAS oncogene family
ENSMFAG00000030662	MLXIP	0.447296	0.0175682	Proinflammatory		protein_coding	MLX interacting protein
ENSMFAG00000033131	RALY	-0.124978	0.0175682			protein_coding	RALY heterogeneous nuclear ribonucleoprotein
ENSMFAG00000038324		0.312334	0.0175682			protein_coding	POM121 transmembrane nucleoporin C
ENSMFAG00000003547	RRP36	-0.200289	0.0175722			protein_coding	ribosomal RNA processing 36
ENSMFAG00000045504	CTR9	-0.19813	0.0176731			protein_coding	CTR9 homolog, Paf1/RNA polymerase II complex component
ENSMFAG00000046099	CNTNAP1	0.470129	0.0176767			protein_coding	contactin associated protein 1
ENSMFAG00000001146		-0.189533	0.0176908			protein_coding	ubiquitin like 5
ENSMFAG00000044317	RAB21	-0.223164	0.0176908			protein_coding	RAB21, member RAS oncogene family
ENSMFAG00000002812	GBF1	0.28642	0.0176912			protein_coding	golgi brefeldin A resistant guanine nucleotide exchange factor 1
ENSMFAG00000000867	ERO1A	-0.285636	0.017696			protein_coding	endoplasmic reticulum oxidoreductase 1 alpha
ENSMFAG00000032658	PDCD2	-0.23049	0.017696			protein_coding	programmed cell death 2
ENSMFAG00000039291	GADD45G	0.934773	0.017696			protein_coding	growth arrest and DNA damage inducible gamma
ENSMFAG00000000037	GRB2	-0.196795	0.0177191			protein_coding	growth factor receptor bound protein 2
ENSMFAG00000034225	ZFHX3	0.409469	0.0177191			protein_coding	zinc finger homeobox 3
ENSMFAG00000045864	FKBP14	0.415225	0.0177403			protein_coding	FKBP prolyl isomerase 14
ENSMFAG00000000231	TIMM17A	-0.239558	0.0177414			protein_coding	translocase of inner mitochondrial membrane 17A
[truncated: 10,242 more rows]

## Sheet: Table_S1B
Effects of Diet on Gene Expression (FDR < 0.05, β sort)
Ensembl Gene ID	Gene Name	Effect Size of Diet (β)	FDR	M1/M2 Polarization Category	CTRA Category	Gene Type	Gene Decription
ENSMFAG00000010314	RF00419	2.47466	0.0375617			snoRNA
ENSMFAG00000045542	FOXJ1	2.17719	0.00788216			protein_coding	forkhead box J1
ENSMFAG00000015798		1.99301	0.043726			protein_coding	ATPase family AAA domain containing 3C
ENSMFAG00000046286		1.95183	0.0393537			protein_coding
ENSMFAG00000028496	GEM	1.70096	0.0106774			protein_coding	GTP binding protein overexpressed in skeletal muscle
ENSMFAG00000003625	ID1	1.65473	0.00893433	Proinflammatory		protein_coding	inhibitor of DNA binding 1, HLH protein
ENSMFAG00000000229	IL6	1.62723	0.0250059		Inflammatory	protein_coding	interleukin 6
ENSMFAG00000009744	RF01684	1.62224	0.0115053			sRNA
ENSMFAG00000013021	RF00017	1.59748	0.00450409			misc_RNA	Metazoan signal recognition particle RNA
ENSMFAG00000041236	DYRK3	1.54723	0.00842409			protein_coding	dual specificity tyrosine phosphorylation regulated kinase 3
ENSMFAG00000036716	RGS1	1.52206	0.0104748			protein_coding	regulator of G protein signaling 1
ENSMFAG00000011061	RF00012	1.51271	0.00613448			snoRNA	Small nucleolar RNA U3
ENSMFAG00000040677	MIR599	1.50186	0.00788216			miRNA	microRNA 599
ENSMFAG00000024378	RF00015	1.4866	0.00955689			snRNA	U4 spliceosomal RNA
ENSMFAG00000001479	C10orf55	1.45892	0.0105975			protein_coding	chromosome 10 open reading frame 55
ENSMFAG00000005598	RF00026	1.44226	0.00937108			snRNA	U6 spliceosomal RNA
ENSMFAG00000038961	SMCO3	1.43118	0.00868522			protein_coding	single-pass membrane protein with coiled-coil domains 3
ENSMFAG00000039939	PLA2G2F	1.42441	0.00992006			protein_coding	phospholipase A2 group IIF
ENSMFAG00000006797	RF00066	1.41938	0.00624097			snRNA	U7 small nuclear RNA
ENSMFAG00000000848	RLN3	1.41781	0.0102478			protein_coding	relaxin 3
ENSMFAG00000007172	ADAMDEC1	1.40482	0.0254209			protein_coding	ADAM like decysin 1
ENSMFAG00000015685		1.38979	0.0193222			protein_coding
ENSMFAG00000008229	RF00017	1.38348	0.00613448			misc_RNA	Metazoan signal recognition particle RNA
ENSMFAG00000017334		1.3828	0.0239459			protein_coding
ENSMFAG00000013137	RF00019	1.38102	0.00937108			misc_RNA	Y RNA
ENSMFAG00000009215	MIR640	1.37834	0.00955689			miRNA	microRNA 640
ENSMFAG00000018877	RF00026	1.3751	0.00821825			snRNA	U6 spliceosomal RNA
ENSMFAG00000012293	RF00019	1.36068	0.00705105			misc_RNA	Y RNA
ENSMFAG00000000907	LDLRAD4	1.35969	0.00926813			protein_coding	low density lipoprotein receptor class A domain containing 4
ENSMFAG00000009513		1.34173	0.00955689			miRNA
ENSMFAG00000038650	PLAU	1.33454	0.00955689			protein_coding	plasminogen activator, urokinase
ENSMFAG00000043168	HSPA2	1.33292	0.0136135			protein_coding	heat shock protein family A (Hsp70) member 2
ENSMFAG00000044330	CLEC4E	1.3282	0.0105975	Proinflammatory		protein_coding	C-type lectin domain family 4 member E
ENSMFAG00000021914	RF00190	1.32518	0.00788216			snoRNA
ENSMFAG00000011428	RF00066	1.31917	0.00893433			snRNA	U7 small nuclear RNA
ENSMFAG00000010438	RF00019	1.31535	0.0107879			misc_RNA	Y RNA
ENSMFAG00000024314	RF00026	1.30123	0.00624097			snRNA	U6 spliceosomal RNA
ENSMFAG00000006172		1.28949	0.0093133			miRNA
ENSMFAG00000044905	CXCL3	1.27715	0.0413759			protein_coding	chemokine (C-X-C motif) ligand 3
ENSMFAG00000023918	RF02116	1.26861	0.0121998			misc_RNA
ENSMFAG00000014913	RF00019	1.26824	0.00613734			misc_RNA	Y RNA
ENSMFAG00000013212	RF00619	1.26113	0.0110677			snRNA	RNA, U6atac small nuclear 39, pseudogene
ENSMFAG00000002983	CAGE1	1.25941	0.0135479			protein_coding	cancer antigen 1
ENSMFAG00000032575		1.25691	0.0107677			protein_coding	leucine, glutamate and lysine rich 1
ENSMFAG00000017667	RF00017	1.24609	0.0112991			misc_RNA	Metazoan signal recognition particle RNA
ENSMFAG00000028402	LRRC10B	1.23717	0.00727223			protein_coding	leucine rich repeat containing 10B
ENSMFAG00000009323	RF00019	1.23357	0.0252372			misc_RNA	Y RNA
ENSMFAG00000037696	SLC7A11	1.22696	0.0113365			protein_coding	solute carrier family 7 member 11
ENSMFAG00000004069	IL1A	1.22316	0.0329662		Inflammatory	protein_coding	interleukin 1 alpha
ENSMFAG00000001077	PLK2	1.22187	0.00893433			protein_coding	polo like kinase 2
ENSMFAG00000031860	CXCL14	1.21367	0.0140846			protein_coding	C-X-C motif chemokine ligand 14
ENSMFAG00000023923		1.20811	0.0116208			pseudogene
ENSMFAG00000041164		1.207	0.0105975			protein_coding
ENSMFAG00000042967	IQCN	1.20312	0.0154482			protein_coding	IQ motif containing N
ENSMFAG00000031357	QRICH2	1.2004	0.0106781			protein_coding	glutamine rich 2
ENSMFAG00000032877	CCDC169	1.19604	0.0205376			protein_coding	coiled-coil domain containing 169
ENSMFAG00000030661	RF00003	1.19467	0.0392195			snRNA	U1 spliceosomal RNA
ENSMFAG00000019841	RF00017	1.18991	0.0117888			misc_RNA	Metazoan signal recognition particle RNA
ENSMFAG00000010600	RF00019	1.18773	0.00788216			misc_RNA	Y RNA
ENSMFAG00000034830	MIR27A	1.18396	0.00613448			miRNA	microRNA 27a
ENSMFAG00000040329	CTH	1.17236	0.00731363	Proinflammatory		protein_coding	cystathionine gamma-lyase
ENSMFAG00000018728	MIRLET7I	1.17149	0.0163011			miRNA	microRNA let-7i
ENSMFAG00000001651		1.16719	0.0111257			protein_coding	butyrophilin subfamily 2 member A2-like
ENSMFAG00000036319		1.15702	0.0118249			protein_coding	C-C motif chemokine ligand 18
ENSMFAG00000021238	RF00004	1.15686	0.0261523			snRNA	U2 spliceosomal RNA
ENSMFAG00000017987	ANKRD42	1.15256	0.00525478			protein_coding	ankyrin repeat domain 42
ENSMFAG00000035439	CXCL2	1.15256	0.0494464			protein_coding	C-X-C motif chemokine ligand 2
ENSMFAG00000033311		1.1483	0.0221499			protein_coding
ENSMFAG00000021219	RF00570	1.14354	0.0101011			snoRNA	small nucleolar RNA, C/D box 64
ENSMFAG00000042947		1.14291	0.0133677			protein_coding
ENSMFAG00000007051		1.13569	0.0192395			protein_coding	C-C motif chemokine 3-like
ENSMFAG00000041280		1.13414	0.0129171			pseudogene
ENSMFAG00000018580	RF00017	1.12627	0.0133857			misc_RNA	Metazoan signal recognition particle RNA
ENSMFAG00000031132	PRSS12	1.12589	0.0127523			protein_coding	serine protease 12
ENSMFAG00000037417	RF00019	1.12563	0.00891099			misc_RNA	Y RNA
ENSMFAG00000019274	RF00394	1.12516	0.0200561			snoRNA
ENSMFAG00000023435	RF02143	1.12385	0.0133674			misc_RNA
ENSMFAG00000013929	MIR3184	1.12177	0.0107677			miRNA	microRNA 3184
ENSMFAG00000035312	SOCS1	1.11963	0.0115053			protein_coding	suppressor of cytokine signaling 1
ENSMFAG00000018523	MIR212	1.11905	0.0107677			miRNA	microRNA 212
ENSMFAG00000023214	RF00017	1.11272	0.0111257			misc_RNA	Metazoan signal recognition particle RNA
ENSMFAG00000016632	RF00019	1.11104	0.0105323			misc_RNA	Y RNA
ENSMFAG00000021539	RF00017	1.10998	0.0133677			misc_RNA	Metazoan signal recognition particle RNA
ENSMFAG00000000159		1.10749	0.0246138			protein_coding	C-C motif chemokine ligand 3
ENSMFAG00000014533	RF00026	1.1074	0.0132529			snRNA	U6 spliceosomal RNA
ENSMFAG00000014301	RF00017	1.10595	0.0200526			misc_RNA	Metazoan signal recognition particle RNA
ENSMFAG00000003177	TNFSF9	1.10363	0.0411321			protein_coding	TNF superfamily member 9
ENSMFAG00000032420	HES1	1.10057	0.0369117			protein_coding	hes family bHLH transcription factor 1
ENSMFAG00000014685		1.09954	0.0107677			miRNA
ENSMFAG00000037636		1.09731	0.00937108			protein_coding
ENSMFAG00000011810	MIR425	1.09337	0.0272537			miRNA	microRNA 425
ENSMFAG00000005186	RF00026	1.09318	0.0139835			snRNA	U6 spliceosomal RNA
ENSMFAG00000033826	RF00019	1.0918	0.0121998			misc_RNA	Y RNA
ENSMFAG00000038551	FBXO48	1.08595	0.00893433			protein_coding	F-box protein 48
ENSMFAG00000006467	RF00066	1.08588	0.0175129			snRNA	U7 small nuclear RNA
ENSMFAG00000013031		1.08261	0.0100076			protein_coding
ENSMFAG00000031372	SOX4	1.08177	0.00727223			protein_coding	SRY-box transcription factor 4
ENSMFAG00000042718		1.07949	0.0135396			miRNA
ENSMFAG00000043691	MSC	1.07938	0.0338767			protein_coding	musculin
ENSMFAG00000035922	MMP1	1.07482	0.0338767			protein_coding	matrix metallopeptidase 1
ENSMFAG00000008222	RF00019	1.07421	0.0133677			misc_RNA	Y RNA
ENSMFAG00000024049	RF00066	1.07029	0.0170633			snRNA	U7 small nuclear RNA
ENSMFAG00000044883	KLF1	1.06987	0.0258957			protein_coding	Kruppel like factor 1
ENSMFAG00000035223		1.06791	0.0295442			miRNA
ENSMFAG00000014032	RF00026	1.06715	0.00870791			snRNA	U6 spliceosomal RNA
ENSMFAG00000010161	MIR612	1.06528	0.00788216			miRNA	microRNA 612
ENSMFAG00000009280	RF00100	1.0643	0.0111391			misc_RNA	7SK RNA
ENSMFAG00000046018		1.06403	0.0115053			protein_coding
ENSMFAG00000036054	TEX54	1.06162	0.0154048			protein_coding	testis expressed 54
ENSMFAG00000010341	RF02123	1.05699	0.00937108			misc_RNA
ENSMFAG00000021322	ADRB2	1.05575	0.00893433			protein_coding	adrenoceptor beta 2
ENSMFAG00000034004	RF00026	1.0555	0.0239173			snRNA	U6 spliceosomal RNA
ENSMFAG00000021218	RF00001	1.05116	0.018974			rRNA	5S ribosomal RNA
ENSMFAG00000034949	RF00026	1.04737	0.0139737			snRNA	U6 spliceosomal RNA
ENSMFAG00000004906		1.04663	0.00955689			miRNA
ENSMFAG00000030393	RF00086	1.04584	0.0255382			snoRNA	Small nucleolar RNA SNORD27
ENSMFAG00000021183	RF00570	1.0453	0.0123962			snoRNA
ENSMFAG00000020264	RF00560	1.0421	0.00955689			snoRNA
ENSMFAG00000006608		1.04123	0.0163011			miRNA
ENSMFAG00000015716	RF00091	1.03991	0.0140109			snoRNA	Small nucleolar RNA SNORA62/SNORA6 family
ENSMFAG00000015528		1.03866	0.0171136			protein_coding
ENSMFAG00000009747	RF00019	1.03716	0.0137945			misc_RNA	Y RNA
ENSMFAG00000004855	RF00278	1.03271	0.02138			snoRNA
ENSMFAG00000000586	TULP2	1.03099	0.0143929			protein_coding	TUB like protein 2
ENSMFAG00000010704	RF00017	1.02415	0.0139054			misc_RNA	Metazoan signal recognition particle RNA
ENSMFAG00000038769	ST20	1.02389	0.0290219			protein_coding	suppressor of tumorigenicity 20
ENSMFAG00000015800	MIR23A	1.02153	0.00613448			miRNA	microRNA 23a
ENSMFAG00000006754	RF00026	1.02114	0.00955689			snRNA	U6 spliceosomal RNA
ENSMFAG00000007222		1.02096	0.029687			miRNA
ENSMFAG00000034388		1.02071	0.0219145			protein_coding
ENSMFAG00000046423	ND4L	1.01912	0.015911			protein_coding	NADH dehydrogenase subunit 4L
ENSMFAG00000013243	RF00019	1.01735	0.0105975			misc_RNA	Y RNA
ENSMFAG00000021159		1.01707	0.02042			miRNA
ENSMFAG00000043030	RGCC	1.01361	0.00624097			protein_coding	regulator of cell cycle
ENSMFAG00000014463		1.01225	0.0164215			miRNA
ENSMFAG00000004035	EPAS1	1.01164	0.0102603			protein_coding	endothelial PAS domain protein 1
ENSMFAG00000013149	MIR320C2	1.01068	0.0134878			miRNA	microRNA 320c-2
ENSMFAG00000010211	RF00020	1.00706	0.0286576			snRNA	U5 spliceosomal RNA
ENSMFAG00000036514		1.00586	0.0227392			pseudogene	hydroxycarboxylic acid receptor 2
ENSMFAG00000006744	RF00019	1.00533	0.0284767			misc_RNA	Y RNA
ENSMFAG00000013498		1.0031	0.0239657			miRNA
ENSMFAG00000035916		1.00239	0.0104748			protein_coding
ENSMFAG00000001119	PHLDA1	0.999247	0.0330394			protein_coding	pleckstrin homology like domain family A member 1
ENSMFAG00000030626		0.997327	0.0133857			protein_coding
ENSMFAG00000000704	IGSF9	0.996145	0.00731363			protein_coding	immunoglobulin superfamily member 9
ENSMFAG00000043140		0.994503	0.0120778			protein_coding
ENSMFAG00000014222		0.990506	0.0250864			protein_coding	uncharacterized LOC101925708
ENSMFAG00000004968	RF00026	0.9899	0.0243699			snRNA	U6 spliceosomal RNA
ENSMFAG00000044366		0.989487	0.0114571			protein_coding
ENSMFAG00000008973	RF00026	0.989168	0.025846			snRNA	U6 spliceosomal RNA
ENSMFAG00000007891	RF01876	0.989122	0.0211605			misc_RNA
ENSMFAG00000004688	RF00026	0.988862	0.0171136			snRNA	U6 spliceosomal RNA
ENSMFAG00000014576	RF00019	0.987038	0.0117909			misc_RNA	Y RNA
ENSMFAG00000019433	RF01225	0.982274	0.0197629			snoRNA
ENSMFAG00000038716		0.975639	0.0239112			protein_coding	HERV-H LTR-associating 3
ENSMFAG00000018091	RF00100	0.975518	0.0149238			misc_RNA	7SK RNA
ENSMFAG00000004582	RF00026	0.974351	0.0115053			snRNA	U6 spliceosomal RNA
ENSMFAG00000008268	RF00026	0.973649	0.0189788			snRNA	U6 spliceosomal RNA
ENSMFAG00000011354	RF00019	0.973438	0.00613448			misc_RNA	Y RNA
ENSMFAG00000006483	RF00026	0.971442	0.0264297			snRNA	U6 spliceosomal RNA
ENSMFAG00000013244		0.971439	0.00891099			miRNA
ENSMFAG00000015345	RF00019	0.970583	0.0205376			misc_RNA	Y RNA
ENSMFAG00000014163	RF00026	0.968415	0.0171916			snRNA	U6 spliceosomal RNA
ENSMFAG00000032133		0.968207	0.0215572			protein_coding
ENSMFAG00000010690	MIR1282	0.965798	0.00869861			miRNA	microRNA 1282
ENSMFAG00000032775	DUSP28	0.964443	0.0134878			protein_coding	dual specificity phosphatase 28
ENSMFAG00000026728		0.963124	0.00788216			protein_coding
ENSMFAG00000030141	RF00608	0.956264	0.00937108			snoRNA	small nucleolar RNA, C/D box 99
ENSMFAG00000038029	FOSB	0.955783	0.00788216	Proinflammatory	Inflammatory	protein_coding	FosB proto-oncogene, AP-1 transcription factor subunit
ENSMFAG00000013188	RF01210	0.952394	0.0482025			snoRNA
ENSMFAG00000045939	C6orf223	0.951099	0.0131536			protein_coding	chromosome 6 open reading frame 223
ENSMFAG00000022846	RF00026	0.945732	0.0343967			snRNA	U6 spliceosomal RNA
ENSMFAG00000030427		0.943077	0.0212281			protein_coding
ENSMFAG00000007023	RF00015	0.942876	0.0239151			snRNA	U4 spliceosomal RNA
ENSMFAG00000012980	RF00017	0.942515	0.0251745			misc_RNA	Metazoan signal recognition particle RNA
ENSMFAG00000002190		0.941982	0.0117888			protein_coding
ENSMFAG00000002019		0.940604	0.0129039			protein_coding
ENSMFAG00000005068	RF00026	0.940108	0.0368884			snRNA	U6 spliceosomal RNA
ENSMFAG00000043879	BAG2	0.939265	0.00788216			protein_coding	BCL2 associated athanogene 2
ENSMFAG00000005238	RF00019	0.939247	0.00613448			misc_RNA	Y RNA
ENSMFAG00000001677		0.938951	0.014524			protein_coding
ENSMFAG00000007289	RF00015	0.937292	0.0165206			snRNA	U4 spliceosomal RNA
ENSMFAG00000039291	GADD45G	0.934773	0.017696			protein_coding	growth arrest and DNA damage inducible gamma
ENSMFAG00000036227	RF00026	0.934533	0.02847			snRNA	U6 spliceosomal RNA
ENSMFAG00000024601	VASN	0.932553	0.0085795			protein_coding	vasorin
ENSMFAG00000004638		0.932237	0.0184994			miRNA
ENSMFAG00000010375	RF02122	0.932027	0.0184217			misc_RNA
ENSMFAG00000014147		0.931303	0.0340323			protein_coding
ENSMFAG00000041602		0.931262	0.016545			protein_coding
ENSMFAG00000021421	RF01956	0.930876	0.00575523			misc_RNA
ENSMFAG00000009073	RF00001	0.930826	0.00964899			rRNA	5S ribosomal RNA
ENSMFAG00000014880	RF00019	0.929803	0.0236594			misc_RNA	Y RNA
ENSMFAG00000013555		0.928087	0.0137366			miRNA
ENSMFAG00000010145	RF01955	0.926229	0.00727223			misc_RNA
ENSMFAG00000039709	ITPR3	0.925987	0.00613448			protein_coding	inositol 1,4,5-trisphosphate receptor type 3
ENSMFAG00000044384	DUSP2	0.925553	0.0346171			protein_coding	dual specificity phosphatase 2
ENSMFAG00000031503	OBSCN	0.923118	0.0134878			protein_coding	obscurin, cytoskeletal calmodulin and titin-interacting RhoGEF
ENSMFAG00000016395	RF00001	0.920578	0.0225053			rRNA	5S ribosomal RNA
ENSMFAG00000012800	RF00019	0.919344	0.00788216			misc_RNA	Y RNA
ENSMFAG00000005091		0.916589	0.0286701			miRNA
ENSMFAG00000014002	RF00019	0.911026	0.0120738			misc_RNA	Y RNA
ENSMFAG00000011623	RF00066	0.910399	0.0249978			snRNA	U7 small nuclear RNA
ENSMFAG00000005619	MIR221	0.909516	0.0355907			miRNA	microRNA 221
ENSMFAG00000032617		0.905768	0.0147246			protein_coding
ENSMFAG00000007929	RF00019	0.904215	0.0350298			misc_RNA	Y RNA
ENSMFAG00000021542		0.903902	0.0124115			miRNA
ENSMFAG00000027740		0.903669	0.0115053			protein_coding
ENSMFAG00000035043	RF00019	0.903157	0.0163988			misc_RNA	Y RNA
ENSMFAG00000041185	CPNE8	0.900407	0.0345109	Proinflammatory		protein_coding	copine 8
ENSMFAG00000022741	RF00026	0.899791	0.0369438			snRNA	U6 spliceosomal RNA
ENSMFAG00000042907	ABCC2	0.899473	0.0136025			protein_coding	ATP binding cassette subfamily C member 2
ENSMFAG00000005454	RF02114	0.897264	0.0323918			misc_RNA
ENSMFAG00000045776		0.896973	0.0137366			protein_coding
ENSMFAG00000039792	CLDND2	0.895586	0.0231035			protein_coding	claudin domain containing 2
ENSMFAG00000046136	LSMEM1	0.894362	0.0406712			protein_coding	leucine rich single-pass membrane protein 1
ENSMFAG00000005329	RF00001	0.893976	0.0151369			rRNA	5S ribosomal RNA
ENSMFAG00000011109	MIR191	0.888083	0.0252644			miRNA	microRNA 191
ENSMFAG00000007440	CABYR	0.887833	0.0104748			protein_coding	calcium binding tyrosine phosphorylation regulated
ENSMFAG00000031932	TAF4B	0.886716	0.0117315			protein_coding	TATA-box binding protein associated factor 4b
ENSMFAG00000033183	BTBD19	0.88647	0.0132529			protein_coding	BTB domain containing 19
ENSMFAG00000011400	RF00017	0.885939	0.01949			misc_RNA	Metazoan signal recognition particle RNA
ENSMFAG00000021884	RF00190	0.884649	0.0204757			snoRNA	small nucleolar RNA, H/ACA box 16B
ENSMFAG00000015899	RF00026	0.884485	0.0464217			snRNA	U6 spliceosomal RNA
ENSMFAG00000003104		0.883705	0.017783			protein_coding
ENSMFAG00000035313	RF00100	0.883512	0.0249978			misc_RNA	7SK RNA
ENSMFAG00000019910		0.883259	0.0191123			protein_coding
ENSMFAG00000008732	RF00100	0.882994	0.0466975			misc_RNA	7SK RNA
ENSMFAG00000006045	MIR505	0.880645	0.0268398			miRNA	microRNA 505
ENSMFAG00000032478	AZIN2	0.877566	0.0341302			protein_coding	antizyme inhibitor 2
ENSMFAG00000040500		0.876943	0.02824			protein_coding
ENSMFAG00000038794	CBS	0.876448	0.041669			protein_coding	cystathionine-beta-synthase
ENSMFAG00000011173	RF00026	0.875072	0.028976			snRNA	U6 spliceosomal RNA
ENSMFAG00000044456	PXDC1	0.874304	0.011913			protein_coding	PX domain containing 1
ENSMFAG00000033054	NOTCH4	0.87192	0.019306			protein_coding	notch receptor 4
ENSMFAG00000011982		0.87167	0.0151461			miRNA
ENSMFAG00000007053		0.871239	0.00787188			protein_coding
ENSMFAG00000015046		0.869805	0.0107677			protein_coding
ENSMFAG00000022358	RF00001	0.8687	0.0388759			rRNA	5S ribosomal RNA
ENSMFAG00000038719		0.868478	0.0179003			protein_coding
ENSMFAG00000030101	RF00090	0.86699	0.0344085			snoRNA	Small nucleolar RNA SNORA74
ENSMFAG00000042255	C19orf67	0.865394	0.0445366			protein_coding	chromosome 19 open reading frame 67
ENSMFAG00000019952	RF00017	0.863635	0.0113365			misc_RNA	Metazoan signal recognition particle RNA
ENSMFAG00000016329	RF00001	0.86311	0.00866382			rRNA	5S ribosomal RNA
ENSMFAG00000037543	BAMBI	0.862867	0.0107677			protein_coding	BMP and activin membrane bound inhibitor
ENSMFAG00000031138		0.860239	0.019638			protein_coding
ENSMFAG00000004718	RF00026	0.859624	0.0288271			snRNA	U6 spliceosomal RNA
ENSMFAG00000001138		0.858526	0.0317432			protein_coding
ENSMFAG00000009436	RF00017	0.857669	0.0337821			misc_RNA	Metazoan signal recognition particle RNA
ENSMFAG00000006910	RF00066	0.856301	0.0255912			snRNA	U7 small nuclear RNA
ENSMFAG00000009512	CNR2	0.855182	0.0227454			protein_coding	cannabinoid receptor 2
ENSMFAG00000038686	TNNT3	0.852323	0.0117315			protein_coding	troponin T3, fast skeletal type
ENSMFAG00000003255		0.84801	0.0465079			protein_coding
ENSMFAG00000004136		0.84714	0.0390824			miRNA
ENSMFAG00000004247	RF00026	0.846493	0.0317432			snRNA	U6 spliceosomal RNA
ENSMFAG00000036654	NR4A2	0.846429	0.00624097	Proinflammatory		protein_coding	nuclear receptor subfamily 4 group A member 2
ENSMFAG00000041542	MAK	0.845707	0.00788216			protein_coding	male germ cell associated kinase
ENSMFAG00000014855	RF00026	0.844646	0.0207417			snRNA	U6 spliceosomal RNA
ENSMFAG00000015992	RF00012	0.844494	0.0369117			snoRNA	Small nucleolar RNA U3
ENSMFAG00000008160	RF02201	0.842863	0.0317432			misc_RNA
ENSMFAG00000015428	RF01161	0.839788	0.0380051			snoRNA
ENSMFAG00000006238		0.839621	0.0357391			miRNA
ENSMFAG00000044746		0.836649	0.0157399			protein_coding
ENSMFAG00000007738	RF00017	0.836367	0.0110602			misc_RNA	Metazoan signal recognition particle RNA
ENSMFAG00000027911	EGR1	0.835803	0.0205125			protein_coding	early growth response 1
ENSMFAG00000016860	RF00026	0.835631	0.00951048			snRNA	U6 spliceosomal RNA
ENSMFAG00000007230		0.834627	0.029792			miRNA
ENSMFAG00000041663	ID3	0.833538	0.0234599			protein_coding	inhibitor of DNA binding 3, HLH protein
ENSMFAG00000020548	RF00569	0.832964	0.0279945			snoRNA	small nucleolar RNA, C/D box 19
ENSMFAG00000003605		0.82916	0.00838415			protein_coding
ENSMFAG00000038828	CXCR5	0.826717	0.0315111			protein_coding	C-X-C motif chemokine receptor 5
ENSMFAG00000007536		0.825589	0.0420402			miRNA
ENSMFAG00000031298	SEMA6B	0.825072	0.0349156			protein_coding	semaphorin 6B
ENSMFAG00000013942	RF00019	0.824792	0.015832			misc_RNA	Y RNA
ENSMFAG00000017481	RF00015	0.819186	0.00937108			snRNA	U4 spliceosomal RNA
ENSMFAG00000019688	RF00156	0.818482	0.0134627			snoRNA	Small nucleolar RNA SNORA70
ENSMFAG00000040370		0.818043	0.0411529			protein_coding
ENSMFAG00000019958	RF00026	0.817958	0.030987			snRNA	U6 spliceosomal RNA
ENSMFAG00000020756	RF00089	0.817755	0.0117964			snoRNA	Small nucleolar RNA SNORD31
ENSMFAG00000015658	RF00054	0.817578	0.026814			snoRNA	Small nucleolar RNA SNORD25
ENSMFAG00000011029	MIRLET7D	0.817159	0.0116146			miRNA	microRNA let-7d
ENSMFAG00000018688	RF00581	0.816545	0.0210223			snoRNA	small nucleolar RNA, C/D box 12C
ENSMFAG00000010954		0.81653	0.0279112			miRNA
ENSMFAG00000000261	TRPM4	0.816429	0.0225491			protein_coding	transient receptor potential cation channel subfamily M member 4
ENSMFAG00000031239		0.810252	0.0199878			protein_coding
ENSMFAG00000007969	RF00325	0.805692	0.0257486			snoRNA	small nucleolar RNA, C/D box 92
ENSMFAG00000002813	ESRP2	0.80527	0.00937108			protein_coding	epithelial splicing regulatory protein 2
ENSMFAG00000007478	RF00019	0.80442	0.0463056			misc_RNA	Y RNA
ENSMFAG00000000556		0.80302	0.0261523			protein_coding
ENSMFAG00000009770	RF01684	0.802673	0.0464045			sRNA
ENSMFAG00000016689	RF00017	0.801534	0.0328615			misc_RNA	Metazoan signal recognition particle RNA
ENSMFAG00000030051	C1orf74	0.80113	0.0136715			protein_coding	chromosome 1 open reading frame 74
ENSMFAG00000030281	GPR84	0.800617	0.0124874			protein_coding	G protein-coupled receptor 84
ENSMFAG00000013482	RF00618	0.80042	0.0284128			snRNA	RNA, U4atac small nuclear 18, pseudogene
ENSMFAG00000035683	TRIM35	0.799659	0.0477325			protein_coding	tripartite motif containing 35
ENSMFAG00000035513		0.798448	0.0139054			protein_coding
ENSMFAG00000046003		0.795657	0.0181536			protein_coding	NBPF member 1
ENSMFAG00000009754	RF00001	0.795481	0.0206397			rRNA	5S ribosomal RNA
ENSMFAG00000019748	RF00017	0.795108	0.0115053			misc_RNA	Metazoan signal recognition particle RNA
ENSMFAG00000001844		0.794287	0.0251449			protein_coding
ENSMFAG00000012220	RF00017	0.794243	0.0222097			misc_RNA	Metazoan signal recognition particle RNA
ENSMFAG00000002450		0.793007	0.0216494			protein_coding
ENSMFAG00000017448	RF00017	0.791318	0.0346171			misc_RNA	Metazoan signal recognition particle RNA
ENSMFAG00000007142	RF00026	0.78806	0.0236723			snRNA	U6 spliceosomal RNA
ENSMFAG00000008707	RF00026	0.786838	0.0489691			snRNA	U6 spliceosomal RNA
ENSMFAG00000001303		0.786504	0.031056			protein_coding
ENSMFAG00000041128	MAST1	0.786066	0.0313366			protein_coding	microtubule associated serine/threonine kinase 1
ENSMFAG00000004235	RF00026	0.785751	0.0487937			snRNA	U6 spliceosomal RNA
ENSMFAG00000001738	HES4	0.785276	0.0235393	Regulatory		protein_coding	hes family bHLH transcription factor 4
ENSMFAG00000017115	RF00017	0.785234	0.0465031			misc_RNA	Metazoan signal recognition particle RNA
ENSMFAG00000042185	APOE	0.78423	0.0264864			protein_coding	apolipoprotein E
ENSMFAG00000034756		0.783632	0.0225053			miRNA
ENSMFAG00000033331		0.782579	0.0171496			pseudogene	calicin
ENSMFAG00000037498		0.781466	0.0171504			protein_coding	zinc finger protein 177
ENSMFAG00000035890	UBQLNL	0.779777	0.0162032			protein_coding	ubiquilin like
ENSMFAG00000017437	IER5	0.779348	0.0193483			protein_coding	immediate early response 5
ENSMFAG00000031533		0.778837	0.0231225			protein_coding
ENSMFAG00000023085	RF00017	0.777741	0.0455198			misc_RNA	Metazoan signal recognition particle RNA
ENSMFAG00000037231	RF00026	0.77702	0.0200622			snRNA	U6 spliceosomal RNA
ENSMFAG00000039611	LRRTM2	0.776413	0.0133857			protein_coding	leucine rich repeat transmembrane neuronal 2
ENSMFAG00000009614	RF00017	0.772785	0.0249482			misc_RNA	Metazoan signal recognition particle RNA
ENSMFAG00000015090	RF00019	0.771069	0.0377915			misc_RNA	Y RNA
ENSMFAG00000008900	MIR590	0.770216	0.00821825			miRNA	microRNA 590
ENSMFAG00000008404		0.770195	0.0377108			miRNA
ENSMFAG00000003722		0.769108	0.0465277			protein_coding
ENSMFAG00000013235	RF00017	0.766299	0.00990431			misc_RNA	Metazoan signal recognition particle RNA
ENSMFAG00000013719		0.766143	0.00964899			protein_coding
ENSMFAG00000008108	RF00017	0.765293	0.0152616			misc_RNA	Metazoan signal recognition particle RNA
ENSMFAG00000034692	PPP1R16B	0.764563	0.0189357			protein_coding	protein phosphatase 1 regulatory subunit 16B
ENSMFAG00000006615	RF02271	0.762921	0.0134088			misc_RNA
ENSMFAG00000014750		0.762849	0.0216771			miRNA
ENSMFAG00000032916		0.762441	0.0355359			protein_coding
ENSMFAG00000029263		0.762253	0.0143626			protein_coding
ENSMFAG00000031168		0.762187	0.0179402			protein_coding
ENSMFAG00000006434	RF00026	0.761839	0.0323479			snRNA	U6 spliceosomal RNA
ENSMFAG00000014674		0.759632	0.0117964			miRNA
ENSMFAG00000023518	RF00277	0.758501	0.0206833			snoRNA	small nucleolar RNA, C/D box 49B
ENSMFAG00000044201	C9orf131	0.758367	0.00788216			protein_coding	chromosome 9 open reading frame 131
ENSMFAG00000043712	LETM2	0.758229	0.0197708			protein_coding	leucine zipper and EF-hand containing transmembrane protein 2
ENSMFAG00000012556	PGBD4	0.757575	0.00893433			protein_coding	piggyBac transposable element derived 4
ENSMFAG00000012579	RF01518	0.756436	0.0295455			misc_RNA
ENSMFAG00000032056	ZBTB10	0.756195	0.00937108			protein_coding	zinc finger and BTB domain containing 10
ENSMFAG00000029512		0.756023	0.038996			protein_coding
ENSMFAG00000045908	F2RL2	0.75579	0.0211669			protein_coding	coagulation factor II thrombin receptor like 2
ENSMFAG00000026566	GPR3	0.755491	0.0115053			protein_coding	G protein-coupled receptor 3
ENSMFAG00000011861	RF00026	0.755448	0.0372436			snRNA	U6 spliceosomal RNA
ENSMFAG00000023545	RF00277	0.74963	0.0230239			snoRNA	small nucleolar RNA, C/D box 49A
ENSMFAG00000006102	RF02271	0.748389	0.0309616			misc_RNA
ENSMFAG00000043107		0.747444	0.0124874			protein_coding
ENSMFAG00000035237	RF00026	0.746269	0.0253959			snRNA	U6 spliceosomal RNA
ENSMFAG00000016126	RF00026	0.745394	0.0397057			snRNA	U6 spliceosomal RNA
ENSMFAG00000007790		0.745134	0.0375024			miRNA
ENSMFAG00000006716		0.744422	0.0497865			miRNA
ENSMFAG00000004519		0.741995	0.0391083			protein_coding
ENSMFAG00000014859	RF00017	0.74106	0.040681			misc_RNA	Metazoan signal recognition particle RNA
ENSMFAG00000028151		0.74076	0.0297382			protein_coding
ENSMFAG00000028779	WDR97	0.73985	0.0171496			protein_coding	WD repeat domain 97
ENSMFAG00000023807	RF00066	0.739113	0.0488484			snRNA	U7 small nuclear RNA
ENSMFAG00000030199	PLN	0.738864	0.0413258			protein_coding	phospholamban
ENSMFAG00000034276	TSPYL2	0.738017	0.0093133			protein_coding	TSPY like 2
ENSMFAG00000038916	RF01946	0.737753	0.0309616			misc_RNA
ENSMFAG00000007696	MIR19A	0.73713	0.049927			miRNA	microRNA 19a
ENSMFAG00000008509	RF00001	0.736463	0.0374501			rRNA	5S ribosomal RNA
ENSMFAG00000033510	RF00019	0.734047	0.0139737			misc_RNA	Y RNA
ENSMFAG00000033078	SOAT2	0.733329	0.0326335			protein_coding	sterol O-acyltransferase 2
ENSMFAG00000035134	RF00019	0.732572	0.0349121			misc_RNA	Y RNA
ENSMFAG00000005821		0.732504	0.0194088			miRNA
ENSMFAG00000001559		0.732419	0.0133677			protein_coding
ENSMFAG00000008631	RF00425	0.732265	0.0308573			snoRNA
ENSMFAG00000041848	TMEM25	0.731904	0.0489691			protein_coding	transmembrane protein 25
ENSMFAG00000030327	B3GALT2	0.731543	0.00821825			protein_coding	beta-1,3-galactosyltransferase 2
ENSMFAG00000001208	ABTB2	0.730964	0.027191			protein_coding	ankyrin repeat and BTB domain containing 2
ENSMFAG00000014365	RF00019	0.730367	0.0347042			misc_RNA	Y RNA
ENSMFAG00000004668		0.730041	0.0211996			miRNA
ENSMFAG00000044581	TMEM132A	0.729094	0.0143929			protein_coding	transmembrane protein 132A
ENSMFAG00000011460	RF00019	0.727549	0.00935734			misc_RNA	Y RNA
ENSMFAG00000002511		0.727451	0.0124137			protein_coding
ENSMFAG00000016954	RF00017	0.727039	0.0325534			misc_RNA	Metazoan signal recognition particle RNA
ENSMFAG00000001230		0.725155	0.0347042			pseudogene	family with sequence similarity 71 member A
ENSMFAG00000007015	RF00217	0.724928	0.00838415			snoRNA	small nucleolar RNA, C/D box 20
ENSMFAG00000015787	RF02108	0.724396	0.0344992			misc_RNA
ENSMFAG00000037426		0.724372	0.0328228			protein_coding
ENSMFAG00000023281	RF00598	0.724221	0.0249482			snoRNA
ENSMFAG00000012632		0.723793	0.0279242			protein_coding
ENSMFAG00000038235		0.722297	0.0314883			protein_coding
ENSMFAG00000044179		0.719836	0.0261863			protein_coding
ENSMFAG00000012871		0.719176	0.0378737			miRNA
ENSMFAG00000030539	BTBD18	0.718933	0.0260278			protein_coding	BTB domain containing 18
ENSMFAG00000033222		0.716071	0.0110451			protein_coding
ENSMFAG00000035320	RF00086	0.714722	0.0195835			snoRNA	Small nucleolar RNA SNORD27
ENSMFAG00000045562	FOSL1	0.714442	0.0485191	Proinflammatory	Inflammatory	protein_coding	FOS like 1, AP-1 transcription factor subunit
ENSMFAG00000027928		0.713907	0.0344536			protein_coding
ENSMFAG00000014915	RF00026	0.713897	0.0185237			snRNA	U6 spliceosomal RNA
ENSMFAG00000031926	RAB7B	0.709729	0.032343			protein_coding	RAB7B, member RAS oncogene family
ENSMFAG00000000057		0.708832	0.0103907			protein_coding
ENSMFAG00000004158	HIST1H2BO	0.708759	0.0322171	Regulatory		protein_coding	histone cluster 1 H2B family member o
ENSMFAG00000012802		0.707508	0.0381952			miRNA
ENSMFAG00000022423	RF01880	0.705597	0.0106774			misc_RNA
ENSMFAG00000034891	RF00019	0.705527	0.048051			misc_RNA	Y RNA
ENSMFAG00000044727		0.704861	0.0104198			protein_coding
ENSMFAG00000046318		0.704264	0.0263873			pseudogene
ENSMFAG00000031796	ADORA2A	0.703221	0.0125233			protein_coding	adenosine A2a receptor
ENSMFAG00000005768	RF00322	0.702728	0.036384			snoRNA	small nucleolar RNA, H/ACA box 31
ENSMFAG00000041815		0.70264	0.020789			protein_coding
ENSMFAG00000032965	TAGAP	0.702422	0.0143809			protein_coding	T cell activation RhoGTPase activating protein
ENSMFAG00000037239		0.702165	0.0214728			protein_coding
ENSMFAG00000009121		0.701966	0.0479488			miRNA
ENSMFAG00000001511		0.701374	0.0134878			protein_coding
ENSMFAG00000030931	LRRC18	0.701244	0.0105975			protein_coding	leucine rich repeat containing 18
ENSMFAG00000033180	NNAT	0.701237	0.0127664			protein_coding	neuronatin
ENSMFAG00000045857	C9orf66	0.699365	0.0337379			protein_coding
ENSMFAG00000020198	RF02120	0.699246	0.0225493			misc_RNA
ENSMFAG00000008704	RF00017	0.699218	0.0258957			misc_RNA	Metazoan signal recognition particle RNA
ENSMFAG00000033154	BEST1	0.698405	0.0134878			protein_coding	bestrophin 1
ENSMFAG00000044287		0.698165	0.0115053			protein_coding
ENSMFAG00000044547		0.698156	0.0253305			protein_coding
ENSMFAG00000030841		0.696368	0.0317432			protein_coding
ENSMFAG00000014890	RF00026	0.695544	0.0487577			snRNA	U6 spliceosomal RNA
ENSMFAG00000004963	LIF	0.692105	0.0453061			protein_coding	LIF interleukin 6 family cytokine
ENSMFAG00000044667	NR1I3	0.691672	0.0161354			protein_coding	nuclear receptor subfamily 1 group I member 3
ENSMFAG00000008657		0.690298	0.00788216			protein_coding
ENSMFAG00000004132	RF00026	0.690026	0.0447764			snRNA	U6 spliceosomal RNA
ENSMFAG00000005045		0.688048	0.0305115			protein_coding
ENSMFAG00000016945	KLHL25	0.687517	0.0430644			protein_coding	kelch like family member 25
ENSMFAG00000000730	BICRA	0.685078	0.0172038			protein_coding	BRD4 interacting chromatin remodeling complex associated protein
ENSMFAG00000022672	RF00017	0.684097	0.022299			misc_RNA	Metazoan signal recognition particle RNA
ENSMFAG00000040255		0.684037	0.0139624			protein_coding
ENSMFAG00000015726	RF00026	0.68359	0.0390824			snRNA	U6 spliceosomal RNA
ENSMFAG00000007424		0.683514	0.0347811			miRNA
ENSMFAG00000013360	RF00026	0.681549	0.0499897			snRNA	U6 spliceosomal RNA
ENSMFAG00000013125	RF00619	0.680737	0.0107677			snRNA
ENSMFAG00000014290		0.680297	0.0264971			miRNA
ENSMFAG00000041064	SERPINE1	0.678757	0.0473572			protein_coding	serpin family E member 1
ENSMFAG00000024265	RF00015	0.678432	0.0357186			snRNA	U4 spliceosomal RNA
ENSMFAG00000042837	SLC25A34	0.674972	0.0219737			protein_coding	solute carrier family 25 member 34
ENSMFAG00000037144	LENG9	0.674227	0.00869861			protein_coding	leukocyte receptor cluster member 9
ENSMFAG00000041286		0.671855	0.0480693			protein_coding
ENSMFAG00000040903	RF00026	0.670464	0.0494135			snRNA	U6 spliceosomal RNA
ENSMFAG00000030358		0.670269	0.0252644			protein_coding
ENSMFAG00000046078		0.669768	0.0355359			protein_coding
ENSMFAG00000033411	AHI1	0.669592	0.00893433			protein_coding	Abelson helper integration site 1
ENSMFAG00000038953	RF00026	0.668899	0.0291104			snRNA	U6 spliceosomal RNA
ENSMFAG00000007699	MIR21	0.667799	0.0121998			miRNA	microRNA 21
ENSMFAG00000042446	GCNT7	0.667299	0.0169917			protein_coding	glucosaminyl (N-acetyl) transferase family member 7
ENSMFAG00000007928		0.667073	0.0219668			miRNA
ENSMFAG00000046002	ICA1L	0.666995	0.00923503			protein_coding	islet cell autoantigen 1 like
ENSMFAG00000013671		0.66591	0.0350549			miRNA
ENSMFAG00000015397	RF00270	0.665808	0.0385073			snoRNA	small nucleolar RNA, C/D box 61
ENSMFAG00000011902	RF00066	0.66504	0.0305595			snRNA	U7 small nuclear RNA
ENSMFAG00000039997	MYLPF	0.664089	0.026117			protein_coding	myosin light chain, phosphorylatable, fast skeletal muscle
ENSMFAG00000042254	GADD45B	0.66407	0.0430258			protein_coding	growth arrest and DNA damage inducible beta
ENSMFAG00000001918	NR4A3	0.66391	0.0342318			protein_coding	nuclear receptor subfamily 4 group A member 3
ENSMFAG00000004368	RF00019	0.663777	0.0463246			misc_RNA	Y RNA
ENSMFAG00000033689	CLBA1	0.662598	0.00947223			protein_coding	clathrin binding box of aftiphilin containing 1
ENSMFAG00000043102		0.661604	0.0161609			protein_coding
ENSMFAG00000039834	SFT2D3	0.661282	0.0246138			protein_coding	SFT2 domain containing 3
ENSMFAG00000006273	SPRY1	0.661087	0.0326591			protein_coding	sprouty RTK signaling antagonist 1
ENSMFAG00000004542	RF00580	0.660966	0.031356			snoRNA
ENSMFAG00000021347	RF01957	0.660827	0.00731363			misc_RNA
ENSMFAG00000003985		0.660656	0.0254526			protein_coding
ENSMFAG00000000533	ARHGAP42	0.659975	0.0135831			protein_coding	Rho GTPase activating protein 42
ENSMFAG00000040242		0.659096	0.010679			protein_coding	uncharacterized LOC101925844
ENSMFAG00000005352	TK1	0.658513	0.0210573			protein_coding	thymidine kinase 1
ENSMFAG00000032323	CSKMT	0.656221	0.00937108			protein_coding	citrate synthase lysine methyltransferase
ENSMFAG00000040066	HIST1H2BN	0.655144	0.0379618			protein_coding	histone cluster 1 H2B family member n
ENSMFAG00000010761	RF00019	0.653917	0.0247725			misc_RNA	Y RNA
ENSMFAG00000037683		0.653827	0.00936177			protein_coding
ENSMFAG00000014145	RF01210	0.653254	0.0153231			snoRNA	small nucleolar RNA, C/D box 13E
ENSMFAG00000036528	SH3D21	0.652596	0.0368959			protein_coding	SH3 domain containing 21
ENSMFAG00000044701		0.65191	0.0165618			protein_coding
ENSMFAG00000014606	FOS	0.651745	0.0193217	Proinflammatory	Inflammatory	protein_coding	Fos proto-oncogene, AP-1 transcription factor subunit
ENSMFAG00000010653	RF00026	0.651421	0.0352232			snRNA	U6 spliceosomal RNA
ENSMFAG00000032431	TEX14	0.651384	0.0320961			protein_coding	testis expressed 14, intercellular bridge forming factor
ENSMFAG00000018552	RF00087	0.650209	0.041888			snoRNA	Small nucleolar RNA SNORD26
ENSMFAG00000001719		0.649841	0.0117537			protein_coding
ENSMFAG00000045412	PLEKHG2	0.649535	0.0179402			protein_coding	pleckstrin homology and RhoGEF domain containing G2
ENSMFAG00000001741	CENPP	0.649037	0.0171988			protein_coding	centromere protein P
ENSMFAG00000011502	RF00151	0.648376	0.0213038			snoRNA	Small nucleolar RNA SNORD58
ENSMFAG00000017789	GPR22	0.647528	0.0102478			protein_coding	G protein-coupled receptor 22
ENSMFAG00000007406	RF00026	0.646759	0.0291401			snRNA	U6 spliceosomal RNA
ENSMFAG00000002551	RTN2	0.646226	0.0214401			protein_coding	reticulon 2
ENSMFAG00000023687	RF00282	0.641481	0.0161354			snoRNA	small nucleolar RNA, C/D box 48
ENSMFAG00000042018	RABEPK	0.641188	0.0103907			protein_coding	Rab9 effector protein with kelch motifs
ENSMFAG00000045779	CD69	0.639311	0.01219			protein_coding	CD69 molecule
ENSMFAG00000006242	EFCAB8	0.639175	0.0129171			protein_coding	EF-hand calcium binding domain 8
ENSMFAG00000019949	RF00003	0.638616	0.0483996			snRNA	U1 spliceosomal RNA
ENSMFAG00000001386	TSPYL4	0.638297	0.00937108			protein_coding	TSPY like 4
ENSMFAG00000044089	EEPD1	0.6378	0.0105975	Proinflammatory		protein_coding	endonuclease/exonuclease/phosphatase family domain containing 1
ENSMFAG00000038779	TNFRSF18	0.636197	0.033628			protein_coding	TNF receptor superfamily member 18
ENSMFAG00000035497	PFKFB3	0.635791	0.019638			protein_coding	6-phosphofructo-2-kinase/fructose-2,6-biphosphatase 3
ENSMFAG00000030417	RF01881	0.635407	0.0200016			misc_RNA
ENSMFAG00000044569	TP53INP2	0.634408	0.00613448			protein_coding	tumor protein p53 inducible nuclear protein 2
ENSMFAG00000043548	AVPI1	0.634117	0.0107677			protein_coding	arginine vasopressin induced 1
ENSMFAG00000030984		0.632228	0.0234599			protein_coding
ENSMFAG00000040697		0.632178	0.0249978			protein_coding
ENSMFAG00000039123		0.631669	0.0156965			protein_coding
ENSMFAG00000023298	RF00017	0.630146	0.0286008			misc_RNA	Metazoan signal recognition particle RNA
ENSMFAG00000035180	PDK4	0.629248	0.0454794			protein_coding	pyruvate dehydrogenase kinase 4
ENSMFAG00000007326	RF02271	0.628815	0.0119152			misc_RNA
ENSMFAG00000008865	RF00548	0.627898	0.048935			snRNA
ENSMFAG00000032976	CDADC1	0.627406	0.0116421			protein_coding	cytidine and dCMP deaminase domain containing 1
ENSMFAG00000011675	RF00017	0.626639	0.0309036			misc_RNA	Metazoan signal recognition particle RNA
ENSMFAG00000002124	ITPKC	0.625481	0.0153231			protein_coding	inositol-trisphosphate 3-kinase C
ENSMFAG00000009500	CCER2	0.624841	0.0198746			protein_coding	coiled-coil glutamate rich protein 2
ENSMFAG00000023471	CPT1B	0.624294	0.0235895			protein_coding	carnitine palmitoyltransferase 1B
ENSMFAG00000002965	IL7	0.624102	0.0197562			protein_coding	interleukin 7
ENSMFAG00000043426	INSYN2B	0.623664	0.0156578			protein_coding	inhibitory synaptic factor family member 2B
ENSMFAG00000003725	GDF15	0.622584	0.0479074			protein_coding	growth differentiation factor 15
ENSMFAG00000005325	RF00016	0.622583	0.0124137			snoRNA	Small nucleolar RNA SNORD14
ENSMFAG00000039083	KLF7	0.622357	0.00893433			protein_coding	Kruppel like factor 7
ENSMFAG00000045979	TTC21A	0.622257	0.00955689			protein_coding	tetratricopeptide repeat domain 21A
ENSMFAG00000022869	RF00415	0.62103	0.0255912			snoRNA	small nucleolar RNA, H/ACA box 30B
ENSMFAG00000042917	C11orf71	0.62014	0.0169439			protein_coding	chromosome 11 open reading frame 71
ENSMFAG00000005294	RF00016	0.620114	0.0139054			snoRNA	Small nucleolar RNA SNORD14
ENSMFAG00000019260	RF00026	0.618193	0.0456894			snRNA	U6 spliceosomal RNA
ENSMFAG00000002534		0.617755	0.0111748			protein_coding
ENSMFAG00000041175		0.61768	0.0105975			protein_coding
ENSMFAG00000032647	ZC3H12A	0.61733	0.0293964	Proinflammatory		protein_coding	zinc finger CCCH-type containing 12A
ENSMFAG00000033392	ATF3	0.615915	0.0115053			protein_coding	activating transcription factor 3
ENSMFAG00000033742		0.615514	0.0107677			protein_coding	LON peptidase N-terminal domain and ring finger 1
ENSMFAG00000009662	RF00409	0.615439	0.0248791			snoRNA
ENSMFAG00000003512	SLC9A3	0.615222	0.0235571			protein_coding	solute carrier family 9 member A3
ENSMFAG00000004531	RF00405	0.613315	0.019306			snoRNA
ENSMFAG00000046039		0.61292	0.0140139			protein_coding
ENSMFAG00000032065	KCND1	0.61131	0.0169528			protein_coding	potassium voltage-gated channel subfamily D member 1
ENSMFAG00000002271	KBTBD6	0.610172	0.0173454			protein_coding	kelch repeat and BTB domain containing 6
ENSMFAG00000045684		0.607614	0.0184263			protein_coding
ENSMFAG00000043034	LONRF3	0.607525	0.0140109			protein_coding	LON peptidase N-terminal domain and ring finger 3
ENSMFAG00000039496	SLC26A1	0.606893	0.0121998			protein_coding	solute carrier family 26 member 1
ENSMFAG00000041544	CCNB1	0.605615	0.00893433			protein_coding	cyclin B1
ENSMFAG00000041352		0.605149	0.0273567			pseudogene
ENSMFAG00000038257	KDM6B	0.604076	0.01219			protein_coding	lysine demethylase 6B
ENSMFAG00000038671	LSR	0.6038	0.0224373			protein_coding	lipolysis stimulated lipoprotein receptor
ENSMFAG00000032132	CDK3	0.602926	0.0333602			protein_coding	cyclin dependent kinase 3
ENSMFAG00000039378	PYGM	0.60192	0.0107879			protein_coding	glycogen phosphorylase, muscle associated
ENSMFAG00000039842	PHACTR1	0.601886	0.0140893			protein_coding	phosphatase and actin regulator 1
ENSMFAG00000007826		0.600658	0.0311722			protein_coding
ENSMFAG00000037957	RAPSN	0.600521	0.0155307			protein_coding	receptor associated protein of the synapse
ENSMFAG00000037569	EXD3	0.600385	0.00990431			protein_coding	exonuclease 3'-5' domain containing 3
ENSMFAG00000031068	APOA2	0.600084	0.0308479			protein_coding	apolipoprotein A2
ENSMFAG00000035698		0.600016	0.0100076			pseudogene
ENSMFAG00000000419		0.599384	0.0136135			protein_coding	purine nucleoside phosphorylase
ENSMFAG00000011567	RF01299	0.599232	0.0156965			snoRNA	small nucleolar RNA, C/D box 2
ENSMFAG00000039359	PLK3	0.599119	0.0160186			protein_coding	polo like kinase 3
ENSMFAG00000001565		0.59849	0.0200016			protein_coding
ENSMFAG00000045469	XRCC3	0.598177	0.00842409			protein_coding	X-ray repair cross complementing 3
ENSMFAG00000043088	BAIAP2	0.597632	0.0288141			protein_coding	BAI1 associated protein 2
ENSMFAG00000009141		0.597103	0.0486564			miRNA
ENSMFAG00000034289	TNFRSF6B	0.596272	0.0104748			protein_coding	TNF receptor superfamily member 6b
ENSMFAG00000036464	RF00026	0.595232	0.0367324			snRNA	U6 spliceosomal RNA
ENSMFAG00000034106		0.594548	0.0274707			protein_coding
ENSMFAG00000043627	ANKDD1B	0.592058	0.0314593			protein_coding	ankyrin repeat and death domain containing 1B
ENSMFAG00000040511	MRNIP	0.590808	0.047511			protein_coding	MRN complex interacting protein
ENSMFAG00000014205	RCVRN	0.588407	0.0133677			protein_coding	recoverin
ENSMFAG00000038648	IRGQ	0.588327	0.00951803			protein_coding	immunity related GTPase Q
ENSMFAG00000043066	LTC4S	0.586194	0.041452			protein_coding	leukotriene C4 synthase
ENSMFAG00000000480	ARMCX4	0.585002	0.0133857			protein_coding	armadillo repeat containing X-linked 4
ENSMFAG00000045958	SLC45A3	0.583823	0.0367899			protein_coding	solute carrier family 45 member 3
ENSMFAG00000045330		0.583356	0.0278127			protein_coding
ENSMFAG00000032143	SLC15A2	0.583207	0.00937108			protein_coding	solute carrier family 15 member 2
ENSMFAG00000038982	RF00276	0.583159	0.031545			snoRNA	small nucleolar RNA, C/D box 52
ENSMFAG00000039492	ALOX12	0.582422	0.0111748			protein_coding	arachidonate 12-lipoxygenase, 12S type
ENSMFAG00000011543	RF00003	0.579865	0.0464597			snRNA	U1 spliceosomal RNA
ENSMFAG00000040134	BHLHE40	0.579036	0.0161354			protein_coding	basic helix-loop-helix family member e40
ENSMFAG00000041769	PPM1L	0.578254	0.0245979	Regulatory		protein_coding	protein phosphatase, Mg2+/Mn2+ dependent 1L
ENSMFAG00000030754		0.576986	0.0473529			protein_coding
ENSMFAG00000046416	ND2	0.576889	0.0100076			protein_coding	NADH dehydrogenase subunit 2
ENSMFAG00000003148	RAPH1	0.576566	0.024201			protein_coding	Ras association (RalGDS/AF-6) and pleckstrin homology domains 1
ENSMFAG00000030104	CCNL1	0.576055	0.0121998	Proinflammatory		protein_coding	cyclin L1
ENSMFAG00000031710		0.576028	0.01274			protein_coding
ENSMFAG00000036942	EGLN3	0.57563	0.0191883			protein_coding	egl-9 family hypoxia inducible factor 3
ENSMFAG00000032249	L3MBTL1	0.574767	0.0171496			protein_coding	L3MBTL histone methyl-lysine binding protein 1
ENSMFAG00000039556		0.573607	0.00990531			protein_coding
ENSMFAG00000030326	HIST2H3A	0.57356	0.0461533			protein_coding	histone H3
ENSMFAG00000017069	RF00439	0.573467	0.0398709			snoRNA	small nucleolar RNA, C/D box 87
ENSMFAG00000029409	OMG	0.57292	0.0477077			protein_coding	oligodendrocyte myelin glycoprotein
ENSMFAG00000012108	RF00017	0.572893	0.0198387			misc_RNA	Metazoan signal recognition particle RNA
ENSMFAG00000041403	GRASP	0.572317	0.0278288			protein_coding	general receptor for phosphoinositides 1 associated scaffold protein
ENSMFAG00000045493	ABHD16B	0.571866	0.0107677			protein_coding	abhydrolase domain containing 16B
ENSMFAG00000043997	PER1	0.570255	0.0111748	Proinflammatory		protein_coding	period circadian regulator 1
ENSMFAG00000024101	RF00017	0.569958	0.0248603			misc_RNA	Metazoan signal recognition particle RNA
ENSMFAG00000035870	KLF4	0.569178	0.00891099			protein_coding	Kruppel like factor 4
ENSMFAG00000005975	RF00026	0.567809	0.0187537			snRNA	U6 spliceosomal RNA
ENSMFAG00000003622	WHRN	0.567616	0.00955689			protein_coding	whirlin
ENSMFAG00000042727		0.567012	0.0300144			protein_coding
ENSMFAG00000021628	RF00614	0.566338	0.0344796			snoRNA	small nucleolar RNA, H/ACA box 11B
ENSMFAG00000037767		0.565442	0.0117696			protein_coding
ENSMFAG00000036131	CDC42BPA	0.563579	0.048051			protein_coding	CDC42 binding protein kinase alpha
ENSMFAG00000040571	AMPD2	0.56274	0.00624097			protein_coding	adenosine monophosphate deaminase 2
ENSMFAG00000014451	RF00088	0.562256	0.0370106			snoRNA	Small nucleolar RNA SNORD30
ENSMFAG00000030990		0.559472	0.0117696			protein_coding
ENSMFAG00000042750		0.559296	0.0100462			protein_coding
ENSMFAG00000000878	CCDC17	0.558242	0.00882592			protein_coding	coiled-coil domain containing 17
ENSMFAG00000000661	KCNK7	0.557086	0.0352442			protein_coding	potassium two pore domain channel subfamily K member 7
ENSMFAG00000032373	CENPN	0.557016	0.0117315			protein_coding	centromere protein N
ENSMFAG00000046417	COX1	0.556763	0.00788216			protein_coding	cytochrome c oxidase subunit I
ENSMFAG00000041912	TMEM251	0.554638	0.0124137			protein_coding	transmembrane protein 251
ENSMFAG00000045463	LMNA	0.554234	0.0342721			protein_coding	lamin A/C
ENSMFAG00000035350	GSTM3	0.553944	0.0252372			protein_coding	glutathione S-transferase mu 3
ENSMFAG00000035347	ABCG1	0.553698	0.0337824			protein_coding	ATP binding cassette subfamily G member 1
ENSMFAG00000031602		0.552074	0.0487937			protein_coding
ENSMFAG00000002805	POLG2	0.550331	0.0133674			protein_coding	DNA polymerase gamma 2, accessory subunit
ENSMFAG00000032222	SKI	0.550244	0.00937108			protein_coding	SKI proto-oncogene
ENSMFAG00000045385	IFRD1	0.549932	0.00727223			protein_coding	interferon related developmental regulator 1
ENSMFAG00000031902		0.549578	0.0219119			protein_coding
ENSMFAG00000030819	RF00085	0.549533	0.0420402			snoRNA	Small nucleolar RNA SNORD28
ENSMFAG00000030643	BTBD11	0.549472	0.0206833			protein_coding	BTB domain containing 11
ENSMFAG00000039587	ACTRT3	0.548932	0.0152616			protein_coding	actin related protein T3
ENSMFAG00000041970		0.548035	0.0322275			protein_coding	perilipin-2
ENSMFAG00000007266		0.54783	0.0255912			protein_coding
ENSMFAG00000019324	RF02187	0.546469	0.0230871			misc_RNA
ENSMFAG00000018730	RF00581	0.546279	0.035601			snoRNA	small nucleolar RNA, C/D box 12B
ENSMFAG00000035653	SLC25A25	0.54627	0.00937108			protein_coding	solute carrier family 25 member 25
ENSMFAG00000010699	NHLRC1	0.546018	0.00788216			protein_coding	NHL repeat containing E3 ubiquitin protein ligase 1
ENSMFAG00000034413	RIPOR3	0.545793	0.0317432			protein_coding	RIPOR family member 3
ENSMFAG00000040716	TSSK6	0.545728	0.0189148			protein_coding	testis specific serine kinase 6
ENSMFAG00000041230	ZSWIM4	0.545341	0.00866072			protein_coding	zinc finger SWIM-type containing 4
ENSMFAG00000043335	ACKR1	0.545325	0.0431476			protein_coding	atypical chemokine receptor 1 (Duffy blood group)
ENSMFAG00000037994	IQSEC2	0.543758	0.0169439	Proinflammatory		protein_coding	IQ motif and Sec7 domain 2
ENSMFAG00000000131	SLC2A8	0.543618	0.0189788			protein_coding	solute carrier family 2 member 8
ENSMFAG00000039316	MYH10	0.543557	0.0211127			protein_coding	myosin heavy chain 10
ENSMFAG00000042382	IRS2	0.543394	0.00893433	Proinflammatory		protein_coding	insulin receptor substrate 2
ENSMFAG00000035766	DUSP10	0.543343	0.00893433	Proinflammatory		protein_coding	dual specificity phosphatase 10
ENSMFAG00000040227	RF00019	0.542776	0.0186519			misc_RNA	Y RNA
ENSMFAG00000002038	IRAK2	0.541588	0.0371706			protein_coding	interleukin 1 receptor associated kinase 2
ENSMFAG00000033014	SPAG4	0.541158	0.0161645			protein_coding	sperm associated antigen 4
ENSMFAG00000037930	NFKBIE	0.539469	0.0108699			protein_coding	NFKB inhibitor epsilon
ENSMFAG00000045393	MAPK8IP1	0.538402	0.0273567			protein_coding	mitogen-activated protein kinase 8 interacting protein 1
ENSMFAG00000041330	INCA1	0.53816	0.0178053			protein_coding	inhibitor of CDK, cyclin A1 interacting protein 1
ENSMFAG00000008003	RF00325	0.537224	0.0289462			snoRNA	small nucleolar RNA, C/D box 53
ENSMFAG00000045829		0.537104	0.0123962			protein_coding
ENSMFAG00000021796	RF00190	0.536143	0.0436356			snoRNA
ENSMFAG00000037180		0.53594	0.0118249			protein_coding
ENSMFAG00000039490	KLF11	0.533667	0.00525478			protein_coding	Kruppel like factor 11
ENSMFAG00000004848	RF00278	0.532595	0.034389			snoRNA	small nucleolar RNA, C/D box 50B
ENSMFAG00000029679		0.531291	0.0115053			protein_coding
ENSMFAG00000013452	RF00221	0.531091	0.0461533			snoRNA	small nucleolar RNA, C/D box 43
ENSMFAG00000025156	RNF122	0.53008	0.0139737	Regulatory		protein_coding	ring finger protein 122
ENSMFAG00000037077	ANKRD33B	0.529005	0.0251341			protein_coding	ankyrin repeat domain 33B
ENSMFAG00000042278	NPHP4	0.528441	0.00893433			protein_coding	nephrocystin 4
ENSMFAG00000002896	TMEM88	0.52774	0.0201049			protein_coding	transmembrane protein 88
ENSMFAG00000009934	RF00019	0.52765	0.0479488			misc_RNA	Y RNA
ENSMFAG00000002562	MAP3K9	0.527274	0.0320636			protein_coding	mitogen-activated protein kinase kinase kinase 9
ENSMFAG00000034296		0.527019	0.0316165			protein_coding
ENSMFAG00000037919	MAP2K3	0.526571	0.00955689			protein_coding	mitogen-activated protein kinase kinase 3
ENSMFAG00000030198		0.524861	0.0249482			protein_coding
ENSMFAG00000041067	SPATA2L	0.524132	0.00752858			protein_coding	spermatogenesis associated 2 like
ENSMFAG00000045788	SELENOW	0.523507	0.0111257			protein_coding	selenoprotein W
ENSMFAG00000042192	ZNF385A	0.522985	0.0274468	Proinflammatory		protein_coding	zinc finger protein 385A
ENSMFAG00000046398	MNT	0.522359	0.00876962			protein_coding	MAX network transcriptional repressor
ENSMFAG00000042343	ZMAT1	0.522282	0.0200514			protein_coding	zinc finger matrin-type 1
ENSMFAG00000040247	RF00003	0.52002	0.0391447			snRNA	U1 spliceosomal RNA
ENSMFAG00000012750	RF00406	0.519596	0.0107677			snoRNA	small nucleolar RNA, H/ACA box 80B
ENSMFAG00000014728	RF01241	0.517254	0.011527			snoRNA	small nucleolar RNA, H/ACA box 81
ENSMFAG00000031623	RADX	0.51715	0.0163437			protein_coding	RPA1 related single stranded DNA binding protein, X-linked
ENSMFAG00000001950	BICDL2	0.517025	0.0190689			protein_coding	BICD family like cargo adaptor 2
ENSMFAG00000012714	RF00017	0.516655	0.0485239			misc_RNA	Metazoan signal recognition particle RNA
ENSMFAG00000019212	MARCKSL1	0.516397	0.04542			protein_coding	MARCKS like 1
ENSMFAG00000002504	ARAP3	0.51584	0.00963591			protein_coding	ArfGAP with RhoGAP domain, ankyrin repeat and PH domain 3
ENSMFAG00000014934	RF00158	0.515636	0.0166389			snoRNA	Small nucleolar RNA SNORD82
ENSMFAG00000027324	KBTBD7	0.515522	0.0147246			protein_coding	kelch repeat and BTB domain containing 7
ENSMFAG00000023822	GRAMD1B	0.514837	0.0234387			protein_coding	GRAM domain containing 1B
ENSMFAG00000031765		0.51469	0.0144727			protein_coding	coiled-coil and C2 domain containing 2B
ENSMFAG00000031869	CHAD	0.514327	0.00842409			protein_coding	chondroadherin
ENSMFAG00000019141	RF00017	0.51383	0.0465434			misc_RNA	Metazoan signal recognition particle RNA
ENSMFAG00000011620		0.513785	0.015911			protein_coding
ENSMFAG00000044736	KLHL21	0.513761	0.00955689			protein_coding	kelch like family member 21
ENSMFAG00000044666	MYO7A	0.512674	0.0143929			protein_coding	myosin VIIA
ENSMFAG00000045642	MTSS1	0.512448	0.00788216	Regulatory		protein_coding	MTSS I-BAR domain containing 1
ENSMFAG00000040772	ADAMTS10	0.510005	0.0288271			protein_coding	ADAM metallopeptidase with thrombospondin type 1 motif 10
ENSMFAG00000045138	STAB1	0.509196	0.0175497	Proinflammatory		protein_coding	stabilin 1
ENSMFAG00000031146	C11orf94	0.508926	0.0171736			protein_coding	chromosome 11 open reading frame 94
ENSMFAG00000009238	H2AFX	0.508601	0.0296608			protein_coding	H2A histone family member X
ENSMFAG00000007540	RF01984	0.508021	0.0148421			misc_RNA
ENSMFAG00000030036	RF00283	0.507438	0.00613448			scaRNA
ENSMFAG00000031730	CCNK	0.506765	0.0093539			protein_coding	cyclin K
ENSMFAG00000003728	RSRP1	0.505923	0.00788216			protein_coding	arginine and serine rich protein 1
ENSMFAG00000012592	RF00003	0.503685	0.033096			snRNA	U1 spliceosomal RNA
ENSMFAG00000044489		0.503382	0.0279592			protein_coding
ENSMFAG00000040960	CLEC20A	0.503163	0.0245702			protein_coding	C-type lectin domain containing 20A
ENSMFAG00000004546	PRR7	0.503107	0.0130622			protein_coding	proline rich 7, synaptic
ENSMFAG00000046426	ND6	0.502692	0.0129171			protein_coding	NADH dehydrogenase subunit 6
ENSMFAG00000037030	ANKRD52	0.499736	0.0107677			protein_coding	ankyrin repeat domain 52
ENSMFAG00000040631	FARP1	0.499533	0.0107879			protein_coding	FERM, ARH/RhoGEF and pleckstrin domain protein 1
ENSMFAG00000041887	SLC7A5	0.499186	0.0337783			protein_coding	solute carrier family 7 member 5
ENSMFAG00000032128	TSPOAP1	0.498226	0.0107677			protein_coding	TSPO associated protein 1
ENSMFAG00000030200	FAM110A	0.498117	0.0121998	Regulatory		protein_coding	family with sequence similarity 110 member A
ENSMFAG00000044956		0.497568	0.0111257			protein_coding
ENSMFAG00000033875	SLC22A5	0.497348	0.00893433			protein_coding	solute carrier family 22 member 5
ENSMFAG00000007932	RF00325	0.497212	0.0451984			snoRNA	small nucleolar RNA, C/D box 53B
ENSMFAG00000004045		0.497131	0.0155307			protein_coding	transcription factor RelB-like
ENSMFAG00000001337	HOMER1	0.495771	0.0147046			protein_coding	homer scaffold protein 1
ENSMFAG00000030719	CLK1	0.495704	0.00955689			protein_coding	Macaca fascicularis CDC like kinase 1 (CLK1), mRNA.
ENSMFAG00000044044	IZUMO4	0.494721	0.0356467			protein_coding	IZUMO family member 4
ENSMFAG00000005271	RF00019	0.493936	0.0124874			misc_RNA	Y RNA
ENSMFAG00000043061	CD163L1	0.493885	0.0417698			protein_coding	CD163 molecule like 1
ENSMFAG00000038689	KMT2D	0.492883	0.0200016			protein_coding	lysine methyltransferase 2D
ENSMFAG00000013828	RF00017	0.492692	0.0492262			misc_RNA	Metazoan signal recognition particle RNA
ENSMFAG00000040602	KLF6	0.492264	0.0107677			protein_coding	Kruppel like factor 6
ENSMFAG00000035174		0.492077	0.0107677			protein_coding	syntaxin-4-like
ENSMFAG00000000744	NFIC	0.492017	0.0223163	Proinflammatory		protein_coding	nuclear factor I C
ENSMFAG00000007663	RF00015	0.491513	0.0289462			snRNA	U4 spliceosomal RNA
ENSMFAG00000001705		0.491419	0.0121998			protein_coding
ENSMFAG00000037055	FER1L5	0.490507	0.00856222			protein_coding	fer-1 like family member 5
ENSMFAG00000038371		0.489075	0.0238301			protein_coding
ENSMFAG00000038575	IFT140	0.488685	0.00788216			protein_coding	intraflagellar transport 140
ENSMFAG00000035423	MAP1LC3A	0.488107	0.00869861			protein_coding	microtubule associated protein 1 light chain 3 alpha
ENSMFAG00000006728	RF00151	0.48513	0.0367075			snoRNA	Small nucleolar RNA SNORD58
ENSMFAG00000038126	ADGRE2	0.484885	0.0320961			protein_coding	adhesion G protein-coupled receptor E2
ENSMFAG00000001788	SNX29	0.484769	0.0211916			protein_coding	sorting nexin 29
ENSMFAG00000013881		0.484766	0.0446595			miRNA
ENSMFAG00000001205	APBB3	0.482791	0.0093539			protein_coding	amyloid beta precursor protein binding family B member 3
ENSMFAG00000037577		0.482621	0.0102201			protein_coding
ENSMFAG00000043323	RHPN2	0.481044	0.0476172			protein_coding	rhophilin Rho GTPase binding protein 2
ENSMFAG00000038017	ATP6V1FNB	0.480875	0.0252644			protein_coding	ATP6V1F neighbor
ENSMFAG00000001442	MAFG	0.480383	0.00839172			protein_coding	MAF bZIP transcription factor G
ENSMFAG00000003221	TGIF1	0.480245	0.00893433			protein_coding	TGFB induced factor homeobox 1
ENSMFAG00000036766	PRR12	0.476995	0.016166	Proinflammatory		protein_coding	proline rich 12
ENSMFAG00000032740	HAGHL	0.47597	0.0474364			protein_coding	hydroxyacylglutathione hydrolase like
ENSMFAG00000040533		0.475108	0.0159265			protein_coding	inducible T cell costimulator ligand
ENSMFAG00000003406	SRRM2	0.474981	0.0267826			protein_coding	serine/arginine repetitive matrix 2
ENSMFAG00000043194	TSSK3	0.474727	0.0168399			protein_coding	testis specific serine kinase 3
ENSMFAG00000039403	ZFC3H1	0.474563	0.00937108			protein_coding	zinc finger C3H1-type containing
ENSMFAG00000039988	SLC19A2	0.473607	0.0148809			protein_coding	solute carrier family 19 member 2
ENSMFAG00000032281		0.473515	0.0169917			protein_coding
ENSMFAG00000001567		0.473502	0.0269136			protein_coding	RNA polymerase II subunit A
ENSMFAG00000025849	MASP2	0.472898	0.00613448			protein_coding	mannan binding lectin serine peptidase 2
ENSMFAG00000039529	GNAT2	0.472317	0.0105323			protein_coding	G protein subunit alpha transducin 2
ENSMFAG00000038561	ZNF844	0.472105	0.0236594			protein_coding	zinc finger protein 433-like
ENSMFAG00000003988	PITPNM2	0.471643	0.0187096			protein_coding	phosphatidylinositol transfer protein membrane associated 2
ENSMFAG00000030607	ZBTB43	0.471114	0.0333612	Proinflammatory		protein_coding	zinc finger and BTB domain containing 43
ENSMFAG00000044450	SLC17A9	0.471113	0.0316024			protein_coding	solute carrier family 17 member 9
ENSMFAG00000039494	DNAJB4	0.471075	0.0213402			protein_coding	DnaJ heat shock protein family (Hsp40) member B4
ENSMFAG00000036403	ABCA2	0.470949	0.0111908			protein_coding	ATP binding cassette subfamily A member 2
ENSMFAG00000043004	CYB5D1	0.47049	0.0143244			protein_coding	cytochrome b5 domain containing 1
ENSMFAG00000001971	OPRL1	0.470333	0.0287455			protein_coding	opioid related nociceptin receptor 1
ENSMFAG00000009314	RF00017	0.470271	0.0105975			misc_RNA	Metazoan signal recognition particle RNA
ENSMFAG00000046099	CNTNAP1	0.470129	0.0176767			protein_coding	contactin associated protein 1
ENSMFAG00000002010	BTG3	0.470061	0.0278296			protein_coding	BTG anti-proliferation factor 3
ENSMFAG00000030559		0.469941	0.0307625			protein_coding
ENSMFAG00000044083	REC8	0.469837	0.0238301	Regulatory		protein_coding	REC8 meiotic recombination protein
ENSMFAG00000003782		0.469527	0.0225491			protein_coding
ENSMFAG00000038773	TM7SF2	0.467857	0.0108699			protein_coding	transmembrane 7 superfamily member 2
ENSMFAG00000041358	CLCN2	0.467637	0.0140139			protein_coding	chloride voltage-gated channel 2
ENSMFAG00000046216	THAP2	0.467125	0.0120778			protein_coding	THAP domain containing 2
ENSMFAG00000044839	JMY	0.466908	0.00788216			protein_coding	junction mediating and regulatory protein, p53 cofactor
ENSMFAG00000000154	SGSM2	0.466841	0.0107677			protein_coding	small G protein signaling modulator 2
ENSMFAG00000040568	FOXH1	0.466361	0.0224354			protein_coding	forkhead box H1
ENSMFAG00000005223	RF00016	0.465602	0.0357186			snoRNA	Small nucleolar RNA SNORD14
ENSMFAG00000037471	RF01985	0.464938	0.0200622			misc_RNA
ENSMFAG00000036589	RFX2	0.464918	0.0420659	Proinflammatory		protein_coding	regulatory factor X2
ENSMFAG00000003241	GFOD1	0.463688	0.0167722			protein_coding	glucose-fructose oxidoreductase domain containing 1
ENSMFAG00000002470	IBA57	0.463612	0.0160916			protein_coding	iron-sulfur cluster assembly factor IBA57
ENSMFAG00000043640	CKS2	0.462747	0.0192153			protein_coding	CDC28 protein kinase regulatory subunit 2
ENSMFAG00000030004	KSR1	0.462055	0.0253111			protein_coding	kinase suppressor of ras 1
ENSMFAG00000019211	RF00284	0.461733	0.0457749			snoRNA
ENSMFAG00000037276	MAPK8IP3	0.461644	0.0135396	Proinflammatory		protein_coding	mitogen-activated protein kinase 8 interacting protein 3
ENSMFAG00000040737	JUND	0.461259	0.0113365		Inflammatory	protein_coding	JunD proto-oncogene, AP-1 transcription factor subunit
ENSMFAG00000032899		0.460497	0.0136025			protein_coding
ENSMFAG00000018679	RF00492	0.460355	0.00613448			scaRNA	small Cajal body-specific RNA 17
ENSMFAG00000046424	ND4	0.460245	0.0137923			protein_coding	NADH dehydrogenase subunit 4
ENSMFAG00000009157	RF00100	0.460112	0.0331986			misc_RNA	7SK RNA
ENSMFAG00000044961		0.460038	0.0107677			protein_coding
ENSMFAG00000001360	BCL6	0.457814	0.0085795			protein_coding	BCL6 transcription repressor
ENSMFAG00000041111	CRY1	0.457305	0.00613448			protein_coding	cryptochrome circadian regulator 1
ENSMFAG00000026126		0.457158	0.0117315			protein_coding
ENSMFAG00000045602	NSUN6	0.456878	0.0342567			protein_coding	NOP2/Sun RNA methyltransferase 6
ENSMFAG00000027191		0.456288	0.0288271			protein_coding
ENSMFAG00000002724		0.455764	0.0184648			protein_coding
ENSMFAG00000002529	CDK6	0.455413	0.00893433			protein_coding	cyclin dependent kinase 6
ENSMFAG00000015757	RF00400	0.455258	0.00923503			snoRNA	small nucleolar RNA, H/ACA box 28
ENSMFAG00000038853	CEP295NL	0.455248	0.0496599			protein_coding	CEP295 N-terminal like
ENSMFAG00000045599	WDR62	0.455099	0.0347128			protein_coding	WD repeat domain 62
ENSMFAG00000034158	SERINC4	0.455061	0.00624097			protein_coding	serine incorporator 4
ENSMFAG00000032999	ERC1	0.454435	0.0143759	Proinflammatory		protein_coding	ELKS/RAB6-interacting/CAST family member 1
ENSMFAG00000002684	KLF12	0.454293	0.0107677			protein_coding	Kruppel like factor 12
ENSMFAG00000043674		0.454109	0.0236594			protein_coding	ral guanine nucleotide dissociation stimulator
ENSMFAG00000045575	OPA3	0.45397	0.0140893			protein_coding	outer mitochondrial membrane lipid metabolism regulator OPA3
ENSMFAG00000042088	XYLT1	0.453719	0.0132529			protein_coding	xylosyltransferase 1
ENSMFAG00000029017	RF00151	0.453509	0.0110791			snoRNA	Small nucleolar RNA SNORD58
ENSMFAG00000021156	RF00015	0.453397	0.013211			snRNA	U4 spliceosomal RNA
ENSMFAG00000003216	IFFO2	0.453379	0.0199453			protein_coding	intermediate filament family orphan 2
ENSMFAG00000046055	ZNF367	0.452479	0.0135057			protein_coding	zinc finger protein 367
ENSMFAG00000033226		0.451216	0.00882592			protein_coding	receptor-type tyrosine-protein phosphatase epsilon-like
ENSMFAG00000001132	CSRNP1	0.449861	0.0286691			protein_coding	cysteine and serine rich nuclear protein 1
ENSMFAG00000032164	MN1	0.449396	0.0151468			protein_coding	MN1 proto-oncogene, transcriptional regulator
ENSMFAG00000038856	ZNF397	0.448427	0.0129192			protein_coding	zinc finger protein 397
ENSMFAG00000031963	LENG8	0.447668	0.0132529	Proinflammatory		protein_coding	leukocyte receptor cluster member 8
ENSMFAG00000030662	MLXIP	0.447296	0.0175682	Proinflammatory		protein_coding	MLX interacting protein
ENSMFAG00000031244		0.447287	0.0134627			protein_coding
ENSMFAG00000038118	NR1D1	0.446661	0.0197714	Regulatory		protein_coding	nuclear receptor subfamily 1 group D member 1
ENSMFAG00000032408		0.446335	0.0107677			protein_coding
ENSMFAG00000044774	ELL	0.445872	0.0180063	Proinflammatory		protein_coding	elongation factor for RNA polymerase II
ENSMFAG00000001229	C7orf61	0.44578	0.0315934			protein_coding	chromosome 7 open reading frame 61
ENSMFAG00000000462	IGSF22	0.445577	0.0257995			protein_coding	immunoglobulin superfamily member 22
ENSMFAG00000040138	MAGI3	0.445555	0.0161354			protein_coding	membrane associated guanylate kinase, WW and PDZ domain containing 3
ENSMFAG00000045065	RIPOR1	0.445498	0.0230871			protein_coding	RHO family interacting cell polarization regulator 1
ENSMFAG00000037984	SLC22A4	0.445369	0.0111137	Proinflammatory		protein_coding	solute carrier family 22 member 4
ENSMFAG00000004536	GPR68	0.445071	0.042272			protein_coding	G protein-coupled receptor 68
ENSMFAG00000042000	THSD1	0.444813	0.0394506			protein_coding	thrombospondin type 1 domain containing 1
ENSMFAG00000002731	FBRS	0.444522	0.00788216			protein_coding	fibrosin
ENSMFAG00000037983	MTURN	0.443981	0.0357236			protein_coding	maturin, neural progenitor differentiation regulator homolog
ENSMFAG00000041558	RRP12	0.443008	0.0091321			protein_coding	ribosomal RNA processing 12 homolog
ENSMFAG00000031220	SESN1	0.442474	0.00821825			protein_coding	sestrin 1
ENSMFAG00000002908	PURB	0.442358	0.00869861			protein_coding	purine rich element binding protein B
ENSMFAG00000043792	MEGF8	0.44132	0.0104843			protein_coding	multiple EGF like domains 8
ENSMFAG00000041004	TNS1	0.441106	0.040485			protein_coding	tensin 1
ENSMFAG00000045278	DDIT3	0.441059	0.0377444			protein_coding	DNA damage inducible transcript 3
ENSMFAG00000002743	SZT2	0.441032	0.0108195			protein_coding	SZT2 subunit of KICSTOR complex
ENSMFAG00000028035	GPR160	0.44038	0.0253613	Proinflammatory		protein_coding	G protein-coupled receptor 160
ENSMFAG00000002979	CBX6	0.439381	0.0416246			protein_coding	chromobox 6
ENSMFAG00000043032	ZBTB40	0.43936	0.00868522			protein_coding	zinc finger and BTB domain containing 40
ENSMFAG00000000999	TSC22D2	0.439332	0.00727223			protein_coding	TSC22 domain family member 2
ENSMFAG00000036407	TASP1	0.438865	0.00980321			protein_coding	taspase 1
ENSMFAG00000007730	RF00017	0.437928	0.0407206			misc_RNA	Metazoan signal recognition particle RNA
ENSMFAG00000030656		0.437748	0.0166162			protein_coding	SH3 domain binding protein 5
ENSMFAG00000004059	TRIM55	0.43712	0.0292975			protein_coding	tripartite motif containing 55
ENSMFAG00000035613	LRRC49	0.436568	0.0143375			protein_coding	leucine rich repeat containing 49
ENSMFAG00000028152	IER2	0.436472	0.0475794			protein_coding	immediate early response 2
ENSMFAG00000035794	SERPINB2	0.434869	0.0406216	Proinflammatory		protein_coding	serpin family B member 2
ENSMFAG00000020536	ZNF446	0.434557	0.00893433			protein_coding	zinc finger protein 446
ENSMFAG00000003213	TPST1	0.434346	0.0109752	Proinflammatory		protein_coding	tyrosylprotein sulfotransferase 1
ENSMFAG00000040033	MIEF2	0.433805	0.00869861			protein_coding	mitochondrial elongation factor 2
ENSMFAG00000000685	KCTD7	0.433136	0.0390032			protein_coding	potassium channel tetramerization domain containing 7
ENSMFAG00000029976	TNKS	0.432625	0.0118929			protein_coding	tankyrase
ENSMFAG00000030808	MEF2D	0.432192	0.00613448	Proinflammatory		protein_coding	myocyte enhancer factor 2D
ENSMFAG00000002040	SLC9A8	0.432149	0.0130384			protein_coding	solute carrier family 9 member A8
ENSMFAG00000046363	CCDC88C	0.432123	0.0102478			protein_coding	coiled-coil domain containing 88C
ENSMFAG00000034519	TNNC1	0.431234	0.0286424			protein_coding	troponin C1, slow skeletal and cardiac type
ENSMFAG00000043418	ELL3	0.430571	0.0367418			protein_coding	elongation factor for RNA polymerase II 3
ENSMFAG00000036590	EAF1	0.430116	0.0111257	Proinflammatory		protein_coding	ELL associated factor 1
ENSMFAG00000032884		0.430067	0.0166389			protein_coding	Snf2 related CREBBP activator protein
ENSMFAG00000041279	DST	0.430061	0.0222034			protein_coding	dystonin
ENSMFAG00000025920	EPM2AIP1	0.429924	0.00838415			protein_coding	EPM2A interacting protein 1
ENSMFAG00000046027	ZNF324B	0.429451	0.0121338			protein_coding	zinc finger protein 324B
ENSMFAG00000000283	PLCG1	0.429333	0.0155626			protein_coding	phospholipase C gamma 1
ENSMFAG00000000234	NBEAL2	0.428916	0.0113365			protein_coding	neurobeachin like 2
ENSMFAG00000045281	RASGRP3	0.428871	0.0107677			protein_coding	RAS guanyl releasing protein 3
ENSMFAG00000030930	SETD1B	0.428833	0.0318653	Proinflammatory		protein_coding	SET domain containing 1B, histone lysine methyltransferase
ENSMFAG00000041869	PPP1R15A	0.428689	0.0368042			protein_coding	protein phosphatase 1 regulatory subunit 15A
ENSMFAG00000032450	SLC26A11	0.428579	0.0332691			protein_coding	solute carrier family 26 member 11
ENSMFAG00000001356		0.427891	0.0143006			protein_coding
ENSMFAG00000001803	OGT	0.427313	0.0102478	Proinflammatory		protein_coding	O-linked N-acetylglucosamine (GlcNAc) transferase
ENSMFAG00000002946	KLHL11	0.427054	0.0121998			protein_coding	Macaca fascicularis kelch like family member 11 (KLHL11), mRNA.
ENSMFAG00000003634	TMEM120B	0.426922	0.00955689			protein_coding	transmembrane protein 120B
ENSMFAG00000040536	TNFAIP2	0.425987	0.0111257			protein_coding	TNF alpha induced protein 2
ENSMFAG00000042489	TLCD2	0.425952	0.0117655			protein_coding	TLC domain containing 2
ENSMFAG00000043082	ZNF503	0.425695	0.0217317			protein_coding	zinc finger protein 503
ENSMFAG00000041938	ULK1	0.425604	0.0168598			protein_coding	unc-51 like autophagy activating kinase 1
ENSMFAG00000046425	ND5	0.425396	0.0203949			protein_coding	NADH dehydrogenase subunit 5
ENSMFAG00000038591	NOL4L	0.424316	0.0197793			protein_coding	nucleolar protein 4 like
ENSMFAG00000001875	SYTL3	0.423461	0.0152716	Proinflammatory		protein_coding	synaptotagmin like 3
ENSMFAG00000027291	PRKCA	0.423339	0.0320961			protein_coding	protein kinase C alpha
ENSMFAG00000031139	NFKB2	0.423187	0.0115811		Inflammatory	protein_coding	nuclear factor kappa B subunit 2
ENSMFAG00000032873	SOGA1	0.423122	0.02847			protein_coding	suppressor of glucose, autophagy associated 1
ENSMFAG00000032030	IDUA	0.42222	0.0232997			protein_coding	iduronidase alpha-L-
ENSMFAG00000038339	SS18L1	0.422214	0.0126236			protein_coding	SS18L1 subunit of BAF chromatin remodeling complex
ENSMFAG00000039001	DYNC2H1	0.422009	0.0344085			protein_coding	dynein cytoplasmic 2 heavy chain 1
ENSMFAG00000017878	RF00017	0.421586	0.0311889			misc_RNA	Metazoan signal recognition particle RNA
ENSMFAG00000030806	BRD4	0.421443	0.0169863			protein_coding	bromodomain containing 4
ENSMFAG00000028411		0.421099	0.0111257			protein_coding
ENSMFAG00000000585	PTPN23	0.421025	0.0174597			protein_coding	protein tyrosine phosphatase non-receptor type 23
ENSMFAG00000001588	ZNF589	0.420539	0.0117696			protein_coding	zinc finger protein 589
ENSMFAG00000046029		0.420029	0.0104748			protein_coding
ENSMFAG00000044605		0.419697	0.0227454			protein_coding
ENSMFAG00000015799	PEAK3	0.419636	0.0198746			protein_coding	PEAK family member 3
ENSMFAG00000033740	TMC6	0.419307	0.0200386			protein_coding	transmembrane channel like 6
ENSMFAG00000002321	RAP1GAP2	0.417709	0.0279209	Regulatory		protein_coding	RAP1 GTPase activating protein 2
ENSMFAG00000030838	THAP8	0.417114	0.0431458			protein_coding	THAP domain containing 8
ENSMFAG00000042659	GBE1	0.416516	0.01219			protein_coding	1,4-alpha-glucan branching enzyme 1
ENSMFAG00000037145	PLCB2	0.41616	0.00788216			protein_coding	phospholipase C beta 2
ENSMFAG00000030398		0.415854	0.0335339			protein_coding
ENSMFAG00000006541	CPEB2	0.415414	0.0105323			protein_coding	cytoplasmic polyadenylation element binding protein 2
ENSMFAG00000045864	FKBP14	0.415225	0.0177403			protein_coding	FKBP prolyl isomerase 14
ENSMFAG00000041830	TCOF1	0.41482	0.0110068			protein_coding	treacle ribosome biogenesis factor 1
ENSMFAG00000018651	RF00581	0.414055	0.0473529			snoRNA	small nucleolar RNA, C/D box 12
ENSMFAG00000035432	ZNF335	0.413302	0.00788216			protein_coding	zinc finger protein 335
ENSMFAG00000002866	TRIB1	0.41329	0.0464524	Proinflammatory		protein_coding	tribbles pseudokinase 1
ENSMFAG00000002381	CCDC9	0.412698	0.0113365			protein_coding	coiled-coil domain containing 9
ENSMFAG00000040780	LPAR2	0.412423	0.0160883			protein_coding	lysophosphatidic acid receptor 2
ENSMFAG00000035462	RGS9	0.412269	0.0462356			protein_coding	regulator of G protein signaling 9
ENSMFAG00000040625	MAST3	0.411303	0.0233299			protein_coding	microtubule associated serine/threonine kinase 3
ENSMFAG00000046422	ND3	0.411092	0.0456886			protein_coding	NADH dehydrogenase subunit 3
ENSMFAG00000044263	ISYNA1	0.410996	0.0276124			protein_coding	inositol-3-phosphate synthase 1
ENSMFAG00000034417	CEP164	0.410937	0.00788216			protein_coding	centrosomal protein 164
ENSMFAG00000033059	NUFIP1	0.409981	0.0115053			protein_coding	nuclear FMR1 interacting protein 1
ENSMFAG00000034225	ZFHX3	0.409469	0.0177191			protein_coding	zinc finger homeobox 3
ENSMFAG00000002660	CCDC97	0.409379	0.0132529			protein_coding	coiled-coil domain containing 97
ENSMFAG00000030913		0.409082	0.0217225			pseudogene
ENSMFAG00000005139	RF00016	0.40856	0.0421524			snoRNA	Small nucleolar RNA SNORD14
ENSMFAG00000031642	RFX1	0.408104	0.00990431			protein_coding	regulatory factor X1
ENSMFAG00000002223	ADGRG1	0.40782	0.0355359			protein_coding	adhesion G protein-coupled receptor G1
ENSMFAG00000033083	FNDC3B	0.407382	0.014019	Proinflammatory		protein_coding	fibronectin type III domain containing 3B
ENSMFAG00000034327	PNPLA7	0.407368	0.0215648			protein_coding	patatin like phospholipase domain containing 7
ENSMFAG00000027537	BNIPL	0.406918	0.0403748			protein_coding	BCL2 interacting protein like
ENSMFAG00000002679	TOM1L2	0.40673	0.0179871			protein_coding	target of myb1 like 2 membrane trafficking protein
ENSMFAG00000019833	SLC5A3	0.406445	0.0387809			protein_coding	solute carrier family 5 member 3
ENSMFAG00000001817	NCOR2	0.405779	0.022981			protein_coding	nuclear receptor corepressor 2
ENSMFAG00000036453	ARL5B	0.405404	0.0484195			protein_coding	ADP ribosylation factor like GTPase 5B
ENSMFAG00000037915	CNNM2	0.404985	0.0135475			protein_coding	cyclin and CBS domain divalent metal cation transport mediator 2
ENSMFAG00000002242	TMEM273	0.404866	0.0372635			protein_coding	transmembrane protein 273
ENSMFAG00000040078	PLEKHA8	0.404837	0.0132521			protein_coding	pleckstrin homology domain containing A8
ENSMFAG00000044696	NKD1	0.404733	0.0441008			protein_coding	NKD inhibitor of WNT signaling pathway 1
ENSMFAG00000042846	HERC1	0.404691	0.0109752	Regulatory		protein_coding	HECT and RLD domain containing E3 ubiquitin protein ligase family member 1
ENSMFAG00000019790	RF00017	0.404672	0.0486398			misc_RNA	Metazoan signal recognition particle RNA
ENSMFAG00000033151	KCNJ13	0.404268	0.0216002			protein_coding	potassium voltage-gated channel subfamily J member 13
ENSMFAG00000002069	ARHGAP26	0.404142	0.0206634	Proinflammatory		protein_coding	Rho GTPase activating protein 26
ENSMFAG00000033615	FOXO3	0.404001	0.0117315			protein_coding	forkhead box O3
ENSMFAG00000006749	RF00408	0.402888	0.0344085			snoRNA	small nucleolar RNA, H/ACA box 1
ENSMFAG00000044628	RASL11A	0.402735	0.0301748			protein_coding	RAS like family 11 member A
ENSMFAG00000040611	TIPARP	0.402517	0.0102553			protein_coding	TCDD inducible poly(ADP-ribose) polymerase
ENSMFAG00000045922	BCL9L	0.402008	0.0103886	Proinflammatory		protein_coding	BCL9 like
ENSMFAG00000046112	PLK1	0.401519	0.0132529			protein_coding	polo like kinase 1
ENSMFAG00000046370		0.401236	0.0238924			protein_coding
ENSMFAG00000032454	PGAM2	0.400128	0.0476627			protein_coding	phosphoglycerate mutase 2
ENSMFAG00000045119	NR2C2	0.400018	0.0140109			protein_coding	nuclear receptor subfamily 2 group C member 2
ENSMFAG00000038696	REL	0.399799	0.0115053		Inflammatory	protein_coding	REL proto-oncogene, NF-kB subunit
ENSMFAG00000037319	ZNF276	0.399331	0.0141163			protein_coding	zinc finger protein 276
ENSMFAG00000042789	BTBD9	0.399097	0.0138224			protein_coding	BTB domain containing 9
ENSMFAG00000036455		0.3988	0.0455198			protein_coding
ENSMFAG00000033436	SMURF1	0.398541	0.0156965			protein_coding	SMAD specific E3 ubiquitin protein ligase 1
ENSMFAG00000033956	DENND6B	0.398266	0.0133677			protein_coding	DENN domain containing 6B
ENSMFAG00000031607	ZNF407	0.397873	0.0131484			protein_coding	zinc finger protein 407
ENSMFAG00000033583	HAUS8	0.397691	0.00893433			protein_coding	HAUS augmin like complex subunit 8
ENSMFAG00000033249	JAG1	0.397115	0.0330831	Proinflammatory		protein_coding	jagged canonical Notch ligand 1
ENSMFAG00000032627	FAM92A	0.396067	0.0369276			protein_coding	family with sequence similarity 92 member A
ENSMFAG00000011027		0.396	0.045668			protein_coding
ENSMFAG00000042289	NPRL3	0.395196	0.0236723			protein_coding	NPR3 like, GATOR1 complex subunit
ENSMFAG00000003351	FUZ	0.39424	0.0128206			protein_coding	fuzzy planar cell polarity protein
ENSMFAG00000041952	CEP131	0.393403	0.0123852			protein_coding	centrosomal protein 131
ENSMFAG00000044460	VPS13D	0.393232	0.0135296			protein_coding	vacuolar protein sorting 13 homolog D
ENSMFAG00000002993		0.39309	0.0440443			protein_coding
ENSMFAG00000029861	NAV1	0.392825	0.0286576			protein_coding	neuron navigator 1
ENSMFAG00000044492	FAM193B	0.392648	0.0193483			protein_coding	family with sequence similarity 193 member B
ENSMFAG00000037196	PHLDB2	0.392172	0.0184171			protein_coding	pleckstrin homology like domain family B member 2
ENSMFAG00000046328	PLA2G6	0.391636	0.0246138			protein_coding	phospholipase A2 group VI
ENSMFAG00000004343	RF00092	0.391549	0.0258255			snoRNA	Small nucleolar RNA SNORA63
ENSMFAG00000033016	FAM13A	0.39151	0.022981	Proinflammatory		protein_coding	family with sequence similarity 13 member A
ENSMFAG00000003819	ADGRB3	0.391	0.0299904			protein_coding	adhesion G protein-coupled receptor B3
ENSMFAG00000041170	TANGO6	0.390682	0.0110068			protein_coding	transport and golgi organization 6 homolog
ENSMFAG00000030286	RFC4	0.390616	0.0211605			protein_coding	replication factor C subunit 4
ENSMFAG00000036446	TRPS1	0.390374	0.0277759	Proinflammatory		protein_coding	transcriptional repressor GATA binding 1
ENSMFAG00000043983	RERE	0.390246	0.0229804			protein_coding	arginine-glutamic acid dipeptide repeats
ENSMFAG00000039610		0.389311	0.0247725			protein_coding	EF-hand calcium binding domain 2
ENSMFAG00000000966	RAD52	0.389279	0.021097			protein_coding	RAD52 homolog, DNA repair protein
ENSMFAG00000003361	AMPD3	0.387661	0.0198221			protein_coding	adenosine monophosphate deaminase 3
ENSMFAG00000032212	MMAA	0.386625	0.0253305			protein_coding	metabolism of cobalamin associated A
ENSMFAG00000035826	ATP13A2	0.386167	0.00869861			protein_coding	ATPase cation transporting 13A2
ENSMFAG00000035544	PPP1R10	0.385594	0.0117655			protein_coding	protein phosphatase 1 regulatory subunit 10
ENSMFAG00000001850	USP20	0.38533	0.00613448			protein_coding	ubiquitin specific peptidase 20
ENSMFAG00000033248	ZNF559	0.385156	0.0245363			protein_coding	zinc finger protein 559
ENSMFAG00000015316	RF00610	0.38443	0.0290978			snoRNA	small nucleolar RNA, C/D box 110
ENSMFAG00000046427	CYTB	0.382401	0.0481809			protein_coding	cytochrome b
ENSMFAG00000046415	ND1	0.381954	0.0388001			protein_coding	NADH dehydrogenase subunit 1
ENSMFAG00000000776	BAHCC1	0.381783	0.0129171			protein_coding	BAH domain and coiled-coil containing 1
ENSMFAG00000003522	WDFY4	0.38162	0.0132175			protein_coding	WDFY family member 4
ENSMFAG00000035851	BAG3	0.381604	0.0200016			protein_coding	BCL2 associated athanogene 3
ENSMFAG00000034665	VPS13B	0.381324	0.0156965			protein_coding	vacuolar protein sorting 13 homolog B
ENSMFAG00000034721	ATP8B4	0.381179	0.0145262			protein_coding	ATPase phospholipid transporting 8B4 (putative)
ENSMFAG00000045110	KCNH3	0.381111	0.0329372			protein_coding	potassium voltage-gated channel subfamily H member 3
ENSMFAG00000001643		0.38101	0.00613448			protein_coding
ENSMFAG00000030601	DENND4A	0.380197	0.0137923	Proinflammatory		protein_coding	DENN domain containing 4A
ENSMFAG00000042459	WDFY2	0.379954	0.0239964			protein_coding	WD repeat and FYVE domain containing 2
ENSMFAG00000002009	CCDC157	0.37991	0.0115053			protein_coding	coiled-coil domain containing 157
ENSMFAG00000040075	FOCAD	0.379899	0.0105504			protein_coding	focadhesin
ENSMFAG00000039797	PHIP	0.379882	0.0118342			protein_coding	pleckstrin homology domain interacting protein
ENSMFAG00000032303	B3GNTL1	0.379876	0.0491395			protein_coding	UDP-GlcNAc:betaGal beta-1,3-N-acetylglucosaminyltransferase like 1
ENSMFAG00000033681	NR3C2	0.379743	0.024899			protein_coding	nuclear receptor subfamily 3 group C member 2
ENSMFAG00000043482	RAD51B	0.379525	0.043439			protein_coding	RAD51 paralog B
ENSMFAG00000001460	TNFSF4	0.379493	0.0107677			protein_coding	TNF superfamily member 4
ENSMFAG00000022120	RF00072	0.379161	0.0345109			snoRNA	Small nucleolar RNA SNORA75
ENSMFAG00000032641	AAK1	0.378641	0.0108269			protein_coding	AP2 associated kinase 1
ENSMFAG00000035627	LATS2	0.378609	0.0193566			protein_coding	large tumor suppressor kinase 2
ENSMFAG00000041615	SEC61A2	0.378272	0.00951803			protein_coding	SEC61 translocon alpha 2 subunit
ENSMFAG00000027496	ZNF324	0.37811	0.00855901			protein_coding	zinc finger protein 324
ENSMFAG00000030972	DIS3L2	0.378061	0.0173061			protein_coding	DIS3 like 3'-5' exoribonuclease 2
ENSMFAG00000000768	C1orf56	0.377508	0.0453061			protein_coding	chromosome 1 open reading frame 56
ENSMFAG00000003726	PPP1R12B	0.377054	0.0210895			protein_coding	protein phosphatase 1 regulatory subunit 12B
ENSMFAG00000008183	PTBP2	0.377026	0.0155307			protein_coding	polypyrimidine tract binding protein 2
ENSMFAG00000038635	WDR90	0.376993	0.0185718			protein_coding	WD repeat domain 90
ENSMFAG00000002085	MBD6	0.376832	0.0149238	Proinflammatory		protein_coding	methyl-CpG binding domain protein 6
ENSMFAG00000032390	DOCK7	0.376112	0.0109752			protein_coding	dedicator of cytokinesis 7
ENSMFAG00000032393	MROH1	0.376005	0.0134088			protein_coding	maestro heat like repeat family member 1
ENSMFAG00000039273	TNIK	0.375999	0.0225491			protein_coding	TRAF2 and NCK interacting kinase
ENSMFAG00000003797	LRBA	0.375847	0.0102478			protein_coding	LPS responsive beige-like anchor protein
ENSMFAG00000026250	EME2	0.375507	0.023159			protein_coding	essential meiotic structure-specific endonuclease subunit 2
ENSMFAG00000039968	ALS2	0.37512	0.00893433			protein_coding	alsin Rho guanine nucleotide exchange factor ALS2
ENSMFAG00000036336	SMCR8	0.375005	0.00893433			protein_coding	SMCR8-C9orf72 complex subunit
ENSMFAG00000002066	EXT1	0.374944	0.0118136			protein_coding	exostosin glycosyltransferase 1
ENSMFAG00000002177	ITFG2	0.374499	0.00787188			protein_coding	integrin alpha FG-GAP repeat containing 2
ENSMFAG00000035430		0.374478	0.0390853			protein_coding
ENSMFAG00000004333	NOP2	0.373508	0.0115053			protein_coding	NOP2 nucleolar protein
ENSMFAG00000003781	CBFA2T3	0.373446	0.0169863			protein_coding	CBFA2/RUNX1 partner transcriptional co-repressor 3
ENSMFAG00000031743	ARIH2OS	0.373245	0.0344085			protein_coding	ariadne RBR E3 ubiquitin protein ligase 2 opposite strand
ENSMFAG00000043898	ARMC5	0.373109	0.00525478			protein_coding	armadillo repeat containing 5
ENSMFAG00000040558	TENT5A	0.371593	0.0120778			protein_coding	terminal nucleotidyltransferase 5A
ENSMFAG00000034468	WEE1	0.37052	0.0387953			protein_coding	WEE1 G2 checkpoint kinase
ENSMFAG00000038768	ZNF487	0.370155	0.0157483			protein_coding	zinc finger protein 487
ENSMFAG00000032275	ZNF467	0.369961	0.0107677	Proinflammatory		protein_coding	zinc finger protein 467
ENSMFAG00000038148	MAP9	0.369917	0.0248641			protein_coding	microtubule associated protein 9
ENSMFAG00000045375	CRTC1	0.369627	0.0118824			protein_coding	CREB regulated transcription coactivator 1
ENSMFAG00000037197	NFAT5	0.369279	0.0258255			protein_coding	nuclear factor of activated T cells 5
ENSMFAG00000040608	TBC1D7	0.368868	0.0115053			protein_coding	TBC1 domain family member 7
ENSMFAG00000032789	PDXP	0.368575	0.0487577			protein_coding	pyridoxal phosphatase
ENSMFAG00000030572	RF00394	0.368436	0.0240923			snoRNA	small nucleolar RNA, H/ACA box 4
ENSMFAG00000005982	P2RY1	0.367974	0.0410791			protein_coding	purinergic receptor P2Y1
ENSMFAG00000037520	BRD2	0.367586	0.00955689			protein_coding	bromodomain containing 2
ENSMFAG00000045239	DNAAF2	0.366596	0.0172038			protein_coding	dynein axonemal assembly factor 2
ENSMFAG00000006255	MIR5047	0.366443	0.0136715			miRNA	microRNA 5047
ENSMFAG00000034305	DIP2A	0.366253	0.0145262			protein_coding	disco interacting protein 2 homolog A
ENSMFAG00000043641	MTX1	0.366159	0.0162032			protein_coding	metaxin 1
ENSMFAG00000046009	NEIL1	0.365111	0.00869861			protein_coding	nei like DNA glycosylase 1
ENSMFAG00000042935		0.365022	0.0334715			protein_coding	zinc finger protein 501-like
ENSMFAG00000001052	UBE2S	0.365006	0.030422			protein_coding	ubiquitin conjugating enzyme E2 S
ENSMFAG00000046309	HIP1R	0.364875	0.0451533			protein_coding	huntingtin interacting protein 1 related
ENSMFAG00000004617	AHDC1	0.364828	0.0337379			protein_coding	AT-hook DNA binding motif containing 1
ENSMFAG00000032689	PIM2	0.364579	0.0203111			protein_coding	Pim-2 proto-oncogene, serine/threonine kinase
ENSMFAG00000006422	RF00026	0.364556	0.0455742			snRNA	U6 spliceosomal RNA
ENSMFAG00000035493	MBD5	0.36401	0.0135396			protein_coding	methyl-CpG binding domain protein 5
ENSMFAG00000002921	SLC9A9	0.363991	0.0475866			protein_coding	solute carrier family 9 member A9
ENSMFAG00000034776	TBC1D12	0.36348	0.0164803			protein_coding	TBC1 domain family member 12
ENSMFAG00000039489	CCDC121	0.363103	0.0285215			protein_coding	coiled-coil domain containing 121
ENSMFAG00000040507	KAT2A	0.36293	0.0107727			protein_coding	lysine acetyltransferase 2A
ENSMFAG00000044063	GRAMD2B	0.362441	0.032493			protein_coding	GRAM domain containing 2B
ENSMFAG00000041100	ZZEF1	0.362239	0.0119187			protein_coding	zinc finger ZZ-type and EF-hand domain containing 1
ENSMFAG00000041960	TMEM175	0.361566	0.0174846			protein_coding	transmembrane protein 175
ENSMFAG00000042927	CIC	0.361492	0.0145262			protein_coding	capicua transcriptional repressor
ENSMFAG00000033854	TECPR2	0.361419	0.0155857			protein_coding	tectonin beta-propeller repeat containing 2
ENSMFAG00000015384	AGO2	0.361084	0.0260896			protein_coding	argonaute RISC catalytic component 2
ENSMFAG00000000793	FBF1	0.360866	0.021097			protein_coding	Fas binding factor 1
ENSMFAG00000044164	NABP1	0.360769	0.0189876			protein_coding	nucleic acid binding protein 1
ENSMFAG00000039907	KIF21B	0.360754	0.00937108	Regulatory		protein_coding	kinesin family member 21B
ENSMFAG00000002985	CRAMP1	0.360651	0.0156181			protein_coding	cramped chromatin regulator homolog 1
ENSMFAG00000046288	PUSL1	0.36035	0.00955689			protein_coding	pseudouridine synthase like 1
ENSMFAG00000043247	PLCB1	0.359976	0.0142815	Proinflammatory		protein_coding	phospholipase C beta 1
ENSMFAG00000032437	KAT6B	0.35969	0.00696466			protein_coding	lysine acetyltransferase 6B
ENSMFAG00000042522	PER2	0.359461	0.0337824			protein_coding	period circadian regulator 2
ENSMFAG00000002306	HECTD4	0.358683	0.0138422			protein_coding	HECT domain E3 ubiquitin protein ligase 4
ENSMFAG00000043680		0.358644	0.00855901			protein_coding	regulator of telomere elongation helicase 1
ENSMFAG00000002293	PAN2	0.35864	0.0093539			protein_coding	poly(A) specific ribonuclease subunit PAN2
ENSMFAG00000041807	MAPK7	0.358598	0.0169864			protein_coding	mitogen-activated protein kinase 7
ENSMFAG00000037344	ARIH1	0.357721	0.00893433			protein_coding	ariadne RBR E3 ubiquitin protein ligase 1
ENSMFAG00000032304	CD84	0.35744	0.0331986	Proinflammatory		protein_coding	CD84 molecule
ENSMFAG00000004992	HIC2	0.35713	0.0117315			protein_coding	HIC ZBTB transcriptional repressor 2
ENSMFAG00000036604	ATG4D	0.356911	0.0113365			protein_coding	autophagy related 4D cysteine peptidase
ENSMFAG00000036413	LYSMD4	0.356587	0.0266728			protein_coding	LysM domain containing 4
ENSMFAG00000046314	NEK8	0.356426	0.00613448			protein_coding	NIMA related kinase 8
ENSMFAG00000000555	UHRF1BP1	0.356373	0.0252644			protein_coding	UHRF1 binding protein 1
ENSMFAG00000035375	UBR4	0.356339	0.0151468	Proinflammatory		protein_coding	ubiquitin protein ligase E3 component n-recognin 4
ENSMFAG00000006999	RF00396	0.355982	0.049411			snoRNA	small nucleolar RNA, H/ACA box 13
ENSMFAG00000016066	PM20D2	0.355807	0.0253959			protein_coding	peptidase M20 domain containing 2
ENSMFAG00000001273	ZBTB7A	0.35564	0.0200016			protein_coding	zinc finger and BTB domain containing 7A
ENSMFAG00000000900	ZFP36	0.355017	0.0305084			protein_coding	ZFP36 ring finger protein
ENSMFAG00000043959	ZMIZ1	0.35375	0.0193217			protein_coding	zinc finger MIZ-type containing 1
ENSMFAG00000035821	TSSK4	0.352989	0.0187512			protein_coding	testis specific serine kinase 4
ENSMFAG00000041051	ZNF300	0.352981	0.0107677			protein_coding	zinc finger protein 300
ENSMFAG00000020465		0.352722	0.0459238			protein_coding
ENSMFAG00000043259	RTTN	0.352459	0.0170633			protein_coding	rotatin
ENSMFAG00000030232		0.352394	0.0351092			protein_coding
ENSMFAG00000031711	CSAD	0.35233	0.0202319			protein_coding	cysteine sulfinic acid decarboxylase
ENSMFAG00000042620		0.351741	0.0166389			protein_coding
ENSMFAG00000003845	C9orf3	0.351694	0.0320381			protein_coding	aminopeptidase O (putative)
ENSMFAG00000000395	BRAT1	0.351666	0.0227059			protein_coding	BRCA1 associated ATM activator 1
ENSMFAG00000022958		0.351621	0.0359557			TR_C_gene
ENSMFAG00000001431	PCBP4	0.351498	0.0165			protein_coding	poly(rC) binding protein 4
ENSMFAG00000033301	TRAK1	0.35141	0.0114958			protein_coding	trafficking kinesin protein 1
ENSMFAG00000033928		0.351217	0.011028			protein_coding	tubulin tyrosine ligase like 3
ENSMFAG00000032324		0.351174	0.0342318			protein_coding	salt inducible kinase 1
ENSMFAG00000037539	CREB5	0.351121	0.0355359	Proinflammatory		protein_coding	cAMP responsive element binding protein 5
ENSMFAG00000032926	EXOC6B	0.350772	0.0192548			protein_coding	exocyst complex component 6B
ENSMFAG00000043399		0.350167	0.0258957			protein_coding	progestin and adipoQ receptor family member 6
ENSMFAG00000015596	RF00091	0.349435	0.0117655			snoRNA	Small nucleolar RNA SNORA62/SNORA6 family
ENSMFAG00000006879	RF00392	0.349387	0.0290712			snoRNA	small nucleolar RNA, H/ACA box 5B
ENSMFAG00000044640	KLC2	0.34922	0.0368219			protein_coding	kinesin light chain 2
ENSMFAG00000018729	RF00100	0.349166	0.0169636			misc_RNA	7SK RNA
ENSMFAG00000001017	ABHD17B	0.349114	0.0449626			protein_coding	abhydrolase domain containing 17B
ENSMFAG00000031954	SLC25A27	0.348868	0.0140674			protein_coding	solute carrier family 25 member 27
ENSMFAG00000033189		0.34814	0.0133677			protein_coding	chimerin 2
ENSMFAG00000002476	KIFC2	0.347482	0.0238301			protein_coding	kinesin family member C2
ENSMFAG00000003917	GAS7	0.347158	0.0220882	Proinflammatory		protein_coding	growth arrest specific 7
ENSMFAG00000000438	ATAT1	0.346814	0.0185208			protein_coding	alpha tubulin acetyltransferase 1
ENSMFAG00000003546	KIAA0319L	0.346406	0.0140109			protein_coding	KIAA0319 like
ENSMFAG00000000237	RFX3	0.345794	0.0371991			protein_coding	regulatory factor X3
ENSMFAG00000045655	ACACA	0.345654	0.0442275			protein_coding	acetyl-CoA carboxylase alpha
ENSMFAG00000043967	CDT1	0.345475	0.0383456			protein_coding	chromatin licensing and DNA replication factor 1
ENSMFAG00000004528		0.345085	0.0276124			protein_coding	zinc finger X-linked protein ZXDB
ENSMFAG00000032863	RELT	0.344813	0.0107677			protein_coding	RELT TNF receptor
ENSMFAG00000014353	AKAP17A	0.344715	0.00866072			protein_coding	A-kinase anchoring protein 17A
ENSMFAG00000043900		0.344665	0.0249482			protein_coding
ENSMFAG00000039369	YBX3	0.344512	0.0259386			protein_coding	Y-box binding protein 3
ENSMFAG00000000498	REXO1	0.344407	0.020151			protein_coding	RNA exonuclease 1 homolog
ENSMFAG00000005726	RF00322	0.344345	0.0270779			snoRNA
ENSMFAG00000044319	C5orf34	0.344275	0.0281926			protein_coding	chromosome 5 open reading frame 34
ENSMFAG00000019633	TRIM3	0.344136	0.0132529			protein_coding	tripartite motif containing 3
ENSMFAG00000036793	KANSL3	0.343727	0.00828157			protein_coding	KAT8 regulatory NSL complex subunit 3
ENSMFAG00000035650	MAN2A2	0.343333	0.0144137			protein_coding	mannosidase alpha class 2A member 2
ENSMFAG00000008879		0.3433	0.0296485			protein_coding
ENSMFAG00000000461	PCNT	0.343247	0.015911			protein_coding	pericentrin
ENSMFAG00000024306	ZNF703	0.342722	0.0260508			protein_coding	zinc finger protein 703
ENSMFAG00000035548	HMBOX1	0.342511	0.0130265	Proinflammatory		protein_coding	homeobox containing 1
ENSMFAG00000031797	DIP2B	0.341997	0.0137923			protein_coding	disco interacting protein 2 homolog B
ENSMFAG00000006771	KCTD11	0.341868	0.0327658			protein_coding	potassium channel tetramerization domain containing 11
ENSMFAG00000041637	FBXL18	0.341819	0.0342182			protein_coding	F-box and leucine rich repeat protein 18
ENSMFAG00000045320	INTS1	0.341786	0.0132175			protein_coding	integrator complex subunit 1
ENSMFAG00000031002	DEF8	0.341178	0.0124874			protein_coding	differentially expressed in FDCP 8 homolog
ENSMFAG00000013867	RF00026	0.340666	0.0489691			snRNA	U6 spliceosomal RNA
ENSMFAG00000002036	DNMBP	0.340656	0.0457131			protein_coding	dynamin binding protein
ENSMFAG00000002145	ABCA1	0.340656	0.0215912			protein_coding	ATP binding cassette subfamily A member 1
ENSMFAG00000021821	RF00190	0.34022	0.0477077			snoRNA	small nucleolar RNA, H/ACA box 16A
ENSMFAG00000000162	PDE4B	0.340214	0.0187096	Proinflammatory		protein_coding	phosphodiesterase 4B
ENSMFAG00000002488	RAI1	0.340204	0.0175497			protein_coding	retinoic acid induced 1
ENSMFAG00000000705	ZBTB37	0.339583	0.0135396			protein_coding	zinc finger and BTB domain containing 37
ENSMFAG00000000341	JMJD1C	0.339514	0.0171916	Proinflammatory		protein_coding	jumonji domain containing 1C
ENSMFAG00000036082	EFHC1	0.338893	0.0444392			protein_coding	EF-hand domain containing 1
ENSMFAG00000033429	ZMYND8	0.338704	0.0102478			protein_coding	zinc finger MYND-type containing 8
ENSMFAG00000036805	SYN1	0.338274	0.0273571			protein_coding	synapsin I
ENSMFAG00000037031	KMT2B	0.338031	0.0167079			protein_coding	lysine methyltransferase 2B
ENSMFAG00000044461	NUP210	0.337641	0.0124874			protein_coding	nucleoporin 210
ENSMFAG00000043873	IQSEC1	0.337326	0.0168795			protein_coding	IQ motif and Sec7 domain 1
ENSMFAG00000036564	ABL2	0.337273	0.0169439			protein_coding	ABL proto-oncogene 2, non-receptor tyrosine kinase
ENSMFAG00000036611	ATRN	0.336679	0.0197629	Proinflammatory		protein_coding	attractin
ENSMFAG00000032206	DLG4	0.336589	0.0297951	Proinflammatory		protein_coding	discs large MAGUK scaffold protein 4
ENSMFAG00000016446	DCUN1D2	0.335936	0.0183362			protein_coding	defective in cullin neddylation 1 domain containing 2
ENSMFAG00000041712	CACNB3	0.335888	0.0456242			protein_coding	calcium voltage-gated channel auxiliary subunit beta 3
ENSMFAG00000021604	RF00279	0.335637	0.0369117			snoRNA	small nucleolar RNA, C/D box 45C
ENSMFAG00000023588	ARHGEF40	0.335554	0.0305786	Proinflammatory		protein_coding	Rho guanine nucleotide exchange factor 40
ENSMFAG00000000818	MDK	0.33543	0.0402433			protein_coding	midkine
ENSMFAG00000001629	INO80D	0.335172	0.029687			protein_coding	INO80 complex subunit D
ENSMFAG00000045581	ZSCAN18	0.334799	0.0463056			protein_coding	zinc finger and SCAN domain containing 18
ENSMFAG00000020113	CHD3	0.334301	0.0117315			protein_coding	chromodomain helicase DNA binding protein 3
ENSMFAG00000040981	VPS52	0.334118	0.0171496			protein_coding	VPS52 subunit of GARP complex
ENSMFAG00000003435	SETD1A	0.33409	0.00842409			protein_coding	SET domain containing 1A, histone lysine methyltransferase
ENSMFAG00000045936	MAD1L1	0.333927	0.0180966			protein_coding	mitotic arrest deficient 1 like 1
ENSMFAG00000044766	PIP5K1C	0.333827	0.0183899			protein_coding	phosphatidylinositol-4-phosphate 5-kinase type 1 gamma
ENSMFAG00000039748	HSPA5	0.333813	0.0317432			protein_coding	heat shock protein family A (Hsp70) member 5
ENSMFAG00000041327	OPHN1	0.333568	0.0485743			protein_coding	oligophrenin 1
ENSMFAG00000023584	RF00594	0.333371	0.0497264			snoRNA	small nucleolar RNA, C/D box 86
ENSMFAG00000037792	SIPA1L3	0.33324	0.0107677			protein_coding	signal induced proliferation associated 1 like 3
ENSMFAG00000032121	CLASRP	0.333052	0.00869861			protein_coding	CLK4 associating serine/arginine rich protein
ENSMFAG00000003635	ITGAV	0.332788	0.0124874			protein_coding	integrin subunit alpha V
ENSMFAG00000031733	MASTL	0.332714	0.0179219			protein_coding	microtubule associated serine/threonine kinase like
ENSMFAG00000025459	TRMT44	0.332212	0.00869861			protein_coding	tRNA methyltransferase 44 homolog
ENSMFAG00000041449	ATXN7L2	0.331705	0.0105975			protein_coding	ataxin 7 like 2
ENSMFAG00000043352	TET3	0.331355	0.0205437			protein_coding	tet methylcytosine dioxygenase 3
ENSMFAG00000000632		0.331247	0.0212281			protein_coding	unk like zinc finger
ENSMFAG00000033731	MYO19	0.331124	0.0156965			protein_coding	myosin XIX
ENSMFAG00000041158	USP46	0.330992	0.0342246			protein_coding	ubiquitin specific peptidase 46
ENSMFAG00000036078	FUK	0.330425	0.0156965			protein_coding	fucose kinase
ENSMFAG00000000567	BRPF3	0.330098	0.00937108			protein_coding	bromodomain and PHD finger containing 3
ENSMFAG00000045363	LEMD3	0.329932	0.00624097			protein_coding	LEM domain containing 3
ENSMFAG00000003191	PI4K2A	0.32993	0.011028			protein_coding	phosphatidylinositol 4-kinase type 2 alpha
ENSMFAG00000031441		0.329322	0.0154025			protein_coding	DEP domain containing 5
ENSMFAG00000034655	SLC27A1	0.329184	0.0169863			protein_coding	solute carrier family 27 member 1
ENSMFAG00000001007	PANK4	0.329121	0.0091321			protein_coding	pantothenate kinase 4
ENSMFAG00000032992	SQSTM1	0.328455	0.0140109			protein_coding	sequestosome 1
ENSMFAG00000001684	CEP89	0.32828	0.0371733			protein_coding	centrosomal protein 89
ENSMFAG00000032924	CCSER1	0.327382	0.0449336			protein_coding	coiled-coil serine rich protein 1
ENSMFAG00000044833	ARMH3	0.327331	0.0114958			protein_coding	armadillo like helical domain containing 3
ENSMFAG00000032753	CLASP1	0.327125	0.0204757			protein_coding	cytoplasmic linker associated protein 1
ENSMFAG00000045000	TCF7	0.326583	0.0192133			protein_coding	transcription factor 7
ENSMFAG00000039303	CDK10	0.326579	0.00727223			protein_coding	cyclin dependent kinase 10
ENSMFAG00000033914	UTRN	0.326508	0.0292929			protein_coding	utrophin
ENSMFAG00000046307	NDUFAF3	0.326416	0.00788216			protein_coding	NADH:ubiquinone oxidoreductase complex assembly factor 3
ENSMFAG00000043878	SLX4	0.326002	0.0178777			protein_coding	SLX4 structure-specific endonuclease subunit
ENSMFAG00000000835	SVIL	0.32576	0.0442445			protein_coding	supervillin
ENSMFAG00000040592	DAGLB	0.32568	0.0228875			protein_coding	diacylglycerol lipase beta
ENSMFAG00000018625	PPT2	0.325238	0.0180964			protein_coding	palmitoyl-protein thioesterase 2
ENSMFAG00000046369	UBR1	0.325097	0.00856222			protein_coding	ubiquitin protein ligase E3 component n-recognin 1
ENSMFAG00000030550	DAGLA	0.325082	0.0290765			protein_coding	diacylglycerol lipase alpha
ENSMFAG00000037252	GTPBP1	0.325037	0.00788216			protein_coding	GTP binding protein 1
ENSMFAG00000038316	POMT1	0.324967	0.00866382			protein_coding	protein O-mannosyltransferase 1
ENSMFAG00000041491	MBNL2	0.324927	0.026117	Proinflammatory		protein_coding	muscleblind like splicing regulator 2
ENSMFAG00000003941	ZMIZ2	0.324603	0.0230692			protein_coding	zinc finger MIZ-type containing 2
ENSMFAG00000000791	PTDSS2	0.324422	0.0475104			protein_coding	phosphatidylserine synthase 2
ENSMFAG00000001327	IFT81	0.3237	0.0367324			protein_coding	intraflagellar transport 81
ENSMFAG00000032726	VTI1A	0.323505	0.0317707			protein_coding	vesicle transport through interaction with t-SNAREs 1A
ENSMFAG00000046269	CUL7	0.323405	0.00866072			protein_coding	cullin 7
ENSMFAG00000017081	ODF2L	0.323347	0.0249978			protein_coding	outer dense fiber of sperm tails 2 like
ENSMFAG00000004010	PHYKPL	0.323127	0.0107677			protein_coding	5-phosphohydroxy-L-lysine phospho-lyase
ENSMFAG00000037621	GABARAPL1	0.322704	0.00955689			protein_coding	GABA type A receptor associated protein like 1
ENSMFAG00000040198	SYNE3	0.322599	0.0154482			protein_coding	spectrin repeat containing nuclear envelope family member 3
ENSMFAG00000037492	DENND4B	0.322547	0.00937108			protein_coding	DENN domain containing 4B
ENSMFAG00000030257	IFT122	0.322271	0.0143759			protein_coding	intraflagellar transport 122
ENSMFAG00000043620	PDE8A	0.322163	0.019638	Regulatory		protein_coding	phosphodiesterase 8A
ENSMFAG00000001228	TNRC18	0.321607	0.0165778	Proinflammatory		protein_coding	trinucleotide repeat containing 18
ENSMFAG00000002648	SCAI	0.320824	0.0451232			protein_coding	suppressor of cancer cell invasion
ENSMFAG00000045780	CDAN1	0.320797	0.0102478			protein_coding	codanin 1
ENSMFAG00000035739	ATF5	0.320161	0.0485478			protein_coding	activating transcription factor 5
ENSMFAG00000044216	UBR5	0.320118	0.0105323			protein_coding	ubiquitin protein ligase E3 component n-recognin 5
ENSMFAG00000044455	MYO1C	0.320042	0.0164215			protein_coding	myosin IC
ENSMFAG00000044625	TRAPPC9	0.320005	0.0239112			protein_coding	trafficking protein particle complex 9
ENSMFAG00000042445	CARMIL2	0.319626	0.0207417			protein_coding	capping protein regulator and myosin 1 linker 2
ENSMFAG00000032652	RUNX1	0.318672	0.0309339	Proinflammatory		protein_coding	RUNX family transcription factor 1
ENSMFAG00000044823		0.318422	0.0446318			protein_coding
ENSMFAG00000044365	USP49	0.318359	0.036645			protein_coding	ubiquitin specific peptidase 49
ENSMFAG00000031044	CBLB	0.318226	0.0196142			protein_coding	Cbl proto-oncogene B
ENSMFAG00000036603	NSUN4	0.318112	0.0115053			protein_coding	NOP2/Sun RNA methyltransferase 4
ENSMFAG00000036563	TMEM143	0.317886	0.0192395			protein_coding	transmembrane protein 143
ENSMFAG00000004660	ASH1L	0.317498	0.0115053			protein_coding	ASH1 like histone lysine methyltransferase
ENSMFAG00000035974	TRIO	0.31744	0.0192395			protein_coding	trio Rho guanine nucleotide exchange factor
ENSMFAG00000045157	SIAH1	0.317371	0.0128227			protein_coding	siah E3 ubiquitin protein ligase 1
ENSMFAG00000039210	NT5DC3	0.316967	0.0477077			protein_coding	5'-nucleotidase domain containing 3
ENSMFAG00000016787	LINGO3	0.316545	0.0355359			protein_coding	leucine rich repeat and Ig domain containing 3
ENSMFAG00000040851	PATL1	0.316336	0.02042			protein_coding	PAT1 homolog 1, processing body mRNA decay factor
ENSMFAG00000032736	MAST2	0.315936	0.0187512			protein_coding	microtubule associated serine/threonine kinase 2
ENSMFAG00000038479	FBXO31	0.315521	0.0279945			protein_coding	F-box protein 31
ENSMFAG00000042301	CDK12	0.315138	0.00959649			protein_coding	cyclin dependent kinase 12
ENSMFAG00000033876	ARMC7	0.314943	0.0249482			protein_coding	armadillo repeat containing 7
ENSMFAG00000037876	SLC9A1	0.314798	0.0291557	Proinflammatory		protein_coding	solute carrier family 9 member A1
ENSMFAG00000041477	EP400	0.314767	0.0252838			protein_coding	E1A binding protein p400
ENSMFAG00000031758	CAMTA2	0.314755	0.0305916			protein_coding	calmodulin binding transcription activator 2
ENSMFAG00000003093	USP36	0.314209	0.00893433			protein_coding	ubiquitin specific peptidase 36
ENSMFAG00000032392	ARID1A	0.313997	0.032504	Proinflammatory		protein_coding	AT-rich interaction domain 1A
ENSMFAG00000045288	CEP85	0.313046	0.00937108			protein_coding	centrosomal protein 85
ENSMFAG00000030019		0.313032	0.0203111			protein_coding
ENSMFAG00000001877	IFT74	0.312611	0.0185946			protein_coding	intraflagellar transport 74
ENSMFAG00000042214	FBXO5	0.312464	0.0335076			protein_coding	F-box protein 5
ENSMFAG00000038324		0.312334	0.0175682			protein_coding	POM121 transmembrane nucleoporin C
ENSMFAG00000025167	CAPRIN2	0.312314	0.0180063			protein_coding	caprin family member 2
ENSMFAG00000032203	METTL23	0.312217	0.0233299			protein_coding	methyltransferase like 23
ENSMFAG00000044591		0.312115	0.0139645			protein_coding	myeloid zinc finger 1
ENSMFAG00000030975	AKAP13	0.311506	0.0169689	Proinflammatory		protein_coding	A-kinase anchoring protein 13
ENSMFAG00000016730	TMEM135	0.31036	0.00955689			protein_coding	transmembrane protein 135
ENSMFAG00000036879	JARID2	0.310357	0.0160883	Proinflammatory		protein_coding	jumonji and AT-rich interaction domain containing 2
ENSMFAG00000032769	WDR25	0.310259	0.0121998			protein_coding	WD repeat domain 25
ENSMFAG00000003112	WDR91	0.310224	0.00893433	Proinflammatory		protein_coding	WD repeat domain 91
ENSMFAG00000033343		0.309869	0.00951803			protein_coding	chromodomain helicase DNA binding protein 2
ENSMFAG00000009642	DALRD3	0.309842	0.0183211			protein_coding	DALR anticodon binding domain containing 3
ENSMFAG00000034679	PCF11	0.309829	0.00788216			protein_coding	PCF11 cleavage and polyadenylation factor subunit
ENSMFAG00000032831	ARHGAP24	0.309713	0.0456894	Proinflammatory		protein_coding	Rho GTPase activating protein 24
ENSMFAG00000033053	EIF5	0.309611	0.0183273			protein_coding	eukaryotic translation initiation factor 5
ENSMFAG00000044248	DOCK4	0.309592	0.0438592	Proinflammatory		protein_coding	dedicator of cytokinesis 4
ENSMFAG00000002592	INPP5E	0.309008	0.0117315			protein_coding	inositol polyphosphate-5-phosphatase E
ENSMFAG00000041892	FCHO1	0.308812	0.0124115			protein_coding	FCH domain only 1
ENSMFAG00000001255	USP35	0.3087	0.0175497			protein_coding	ubiquitin specific peptidase 35
ENSMFAG00000041087	HERC2	0.308439	0.0478776			protein_coding	HECT and RLD domain containing E3 ubiquitin protein ligase 2
ENSMFAG00000038712	SP2	0.308424	0.0438915			protein_coding	Sp2 transcription factor
ENSMFAG00000042257	MAPKBP1	0.308301	0.0163011			protein_coding	mitogen-activated protein kinase binding protein 1
ENSMFAG00000039422	NDOR1	0.307499	0.0142018			protein_coding	NADPH dependent diflavin oxidoreductase 1
ENSMFAG00000040263	ANKRD11	0.307256	0.0199878			protein_coding	ankyrin repeat domain 11
ENSMFAG00000035536	CASK	0.306957	0.0258957			protein_coding	calcium/calmodulin dependent serine protein kinase
ENSMFAG00000039429	ACAP3	0.306235	0.0275141			protein_coding	ArfGAP with coiled-coil, ankyrin repeat and PH domains 3
ENSMFAG00000040082	KIAA0556	0.306202	0.0195111			protein_coding	KIAA0556
ENSMFAG00000034414	SPATA7	0.306194	0.0320392			protein_coding	spermatogenesis associated 7
ENSMFAG00000045169	LRCH3	0.306132	0.0133559			protein_coding	leucine rich repeats and calponin homology domain containing 3
ENSMFAG00000034672		0.306074	0.0218671			protein_coding
ENSMFAG00000032083	HIF1A	0.30574	0.0151369	Proinflammatory		protein_coding	hypoxia inducible factor 1 subunit alpha
ENSMFAG00000046075	KMT2C	0.305436	0.0228683			protein_coding	lysine methyltransferase 2C
ENSMFAG00000038534	UBALD2	0.30542	0.0115053			protein_coding	UBA like domain containing 2
ENSMFAG00000041409	CEP68	0.305272	0.0117655			protein_coding	centrosomal protein 68
ENSMFAG00000003394	SMG6	0.30527	0.0160883			protein_coding	SMG6 nonsense mediated mRNA decay factor
ENSMFAG00000000876	SFXN5	0.305089	0.0139054			protein_coding	sideroflexin 5
ENSMFAG00000001048	CLCN6	0.305078	0.0260979			protein_coding	chloride voltage-gated channel 6
ENSMFAG00000037664	SERTAD2	0.304782	0.0195847	Proinflammatory		protein_coding	SERTA domain containing 2
ENSMFAG00000032988	ELMOD3	0.304559	0.0252644			protein_coding	ELMO domain containing 3
ENSMFAG00000030968	NEMP2	0.30408	0.0121998			protein_coding	nuclear envelope integral membrane protein 2
ENSMFAG00000036353	DDHD1	0.30405	0.0121998			protein_coding	DDHD domain containing 1
ENSMFAG00000027428	LRSAM1	0.304009	0.0161495			protein_coding	leucine rich repeat and sterile alpha motif containing 1
ENSMFAG00000002767	ATG2A	0.303886	0.0171496			protein_coding	autophagy related 2A
ENSMFAG00000038592	ALMS1	0.30346	0.0169863			protein_coding	ALMS1 centrosome and basal body associated protein
ENSMFAG00000034104	CITED2	0.303351	0.0271874			protein_coding	Cbp/p300 interacting transactivator with Glu/Asp rich carboxy-terminal domain 2
ENSMFAG00000041523	MFSD13A	0.30316	0.0233753			protein_coding	major facilitator superfamily domain containing 13A
ENSMFAG00000037903	CTIF	0.302913	0.0245363	Proinflammatory		protein_coding	cap binding complex dependent translation initiation factor
ENSMFAG00000036185	TTC19	0.302798	0.0124297			protein_coding	tetratricopeptide repeat domain 19
ENSMFAG00000001002	RILP	0.302778	0.0110677			protein_coding	Rab interacting lysosomal protein
ENSMFAG00000030080	CEBPA	0.302307	0.0228683			protein_coding	CCAAT enhancer binding protein alpha
ENSMFAG00000000574	GNA15	0.302266	0.0291401			protein_coding	G protein subunit alpha 15
ENSMFAG00000036554	ABCC10	0.302123	0.0148668			protein_coding	ATP binding cassette subfamily C member 10
ENSMFAG00000002881	KIF3C	0.302084	0.0349647			protein_coding	kinesin family member 3C
ENSMFAG00000039571	PCP2	0.302061	0.0171496			protein_coding	Purkinje cell protein 2
ENSMFAG00000030857	PDPK1	0.302025	0.0114571			protein_coding	3-phosphoinositide dependent protein kinase 1
ENSMFAG00000043819	POMT2	0.301829	0.0170263			protein_coding	protein O-mannosyltransferase 2
ENSMFAG00000033077	EFEMP2	0.301826	0.0154342			protein_coding	EGF containing fibulin extracellular matrix protein 2
ENSMFAG00000041988	MBP	0.301766	0.0107677			protein_coding	myelin basic protein
ENSMFAG00000044314	PDPR	0.301752	0.0451194			protein_coding	pyruvate dehydrogenase phosphatase regulatory subunit
ENSMFAG00000033735	GIGYF1	0.30163	0.0107677			protein_coding	GRB10 interacting GYF protein 1
ENSMFAG00000030887	GPRASP1	0.301527	0.0228591			protein_coding	G protein-coupled receptor associated sorting protein 1
ENSMFAG00000042903	DGKA	0.301322	0.0130384	Proinflammatory		protein_coding	diacylglycerol kinase alpha
ENSMFAG00000030826	RAB3A	0.301225	0.0484545			protein_coding	RAB3A, member RAS oncogene family
ENSMFAG00000039835	GPATCH2L	0.301173	0.0128463			protein_coding	G-patch domain containing 2 like
ENSMFAG00000032161	MED12	0.301169	0.0117315			protein_coding	mediator complex subunit 12
ENSMFAG00000033293	PDE1B	0.300833	0.0332691			protein_coding	phosphodiesterase 1B
ENSMFAG00000039809	CDYL2	0.300828	0.0277206	Regulatory		protein_coding	chromodomain Y like 2
ENSMFAG00000003775	MSI2	0.300709	0.0121197			protein_coding	musashi RNA binding protein 2
ENSMFAG00000033693	CD6	0.300677	0.0299904			protein_coding	CD6 molecule
ENSMFAG00000033381	PPP2R3B	0.300663	0.0318878			protein_coding	protein phosphatase 2 regulatory subunit B''beta
ENSMFAG00000017282	ZNF414	0.300309	0.0259018			protein_coding	zinc finger protein 414
ENSMFAG00000031784	NECAP1	0.300075	0.0443918	Proinflammatory		protein_coding	NECAP endocytosis associated 1
ENSMFAG00000040840	SMG9	0.299859	0.0299904			protein_coding	SMG9 nonsense mediated mRNA decay factor
ENSMFAG00000042608	OFD1	0.299724	0.0156965			protein_coding	OFD1 centriole and centriolar satellite protein
ENSMFAG00000036747	CROCC	0.299682	0.0384714			protein_coding	ciliary rootlet coiled-coil, rootletin
ENSMFAG00000003872	MICAL2	0.299642	0.0225053	Proinflammatory		protein_coding	microtubule associated monooxygenase, calponin and LIM domain containing 2
ENSMFAG00000016607	CABLES2	0.299236	0.0154482			protein_coding	Cdk5 and Abl enzyme substrate 2
ENSMFAG00000014792	SLC12A6	0.298994	0.0169636	Proinflammatory		protein_coding	solute carrier family 12 member 6
ENSMFAG00000041453	D2HGDH	0.298322	0.0344085			protein_coding	D-2-hydroxyglutarate dehydrogenase
ENSMFAG00000008793	RF01871	0.29791	0.0239657			misc_RNA
ENSMFAG00000026038	UNC13D	0.297889	0.0161645			protein_coding	unc-13 homolog D
ENSMFAG00000044504	ZCCHC14	0.297704	0.0483946			protein_coding	zinc finger CCHC-type containing 14
ENSMFAG00000030569	YOD1	0.29757	0.0153262			protein_coding	YOD1 deubiquitinase
ENSMFAG00000002490	UBXN11	0.297411	0.0321698			protein_coding	UBX domain protein 11
ENSMFAG00000045488	INF2	0.296951	0.0275134	Proinflammatory		protein_coding	inverted formin, FH2 and WH2 domain containing
ENSMFAG00000031008	PRDM10	0.29695	0.0136394			protein_coding	PR/SET domain 10
ENSMFAG00000041283	ZFAT	0.296817	0.00893433			protein_coding	zinc finger and AT-hook domain containing
ENSMFAG00000033591	KIF1B	0.296586	0.0212727			protein_coding	kinesin family member 1B
ENSMFAG00000036555	NFKB1	0.296463	0.0174176		Inflammatory	protein_coding	nuclear factor kappa B subunit 1
ENSMFAG00000039678	RIN1	0.296329	0.0454386			protein_coding	Ras and Rab interactor 1
ENSMFAG00000041302	ZNF789	0.296267	0.00893433			protein_coding	zinc finger protein 789
ENSMFAG00000043062	SMG1	0.296222	0.0162183			protein_coding	SMG1 nonsense mediated mRNA decay associated PI3K related kinase
ENSMFAG00000038015	METRNL	0.295907	0.0326246			protein_coding	meteorin like, glial cell differentiation regulator
ENSMFAG00000044979	BTAF1	0.295545	0.0151815	Proinflammatory		protein_coding	B-TFIID TATA-box binding protein associated factor 1
ENSMFAG00000046038	FHOD1	0.295148	0.00955689			protein_coding	formin homology 2 domain containing 1
ENSMFAG00000045323	YEATS2	0.294899	0.0105975			protein_coding	YEATS domain containing 2
ENSMFAG00000045875	CENPA	0.294604	0.0360373			protein_coding	centromere protein A
ENSMFAG00000039823	SREK1	0.294555	0.0107677			protein_coding	splicing regulatory glutamic acid and lysine rich protein 1
ENSMFAG00000044402		0.294347	0.0193566			pseudogene
ENSMFAG00000042587	IKBKE	0.293512	0.019141	Proinflammatory		protein_coding	inhibitor of nuclear factor kappa B kinase subunit epsilon
ENSMFAG00000003982	PLPP5	0.293397	0.0159554			protein_coding	phospholipid phosphatase 5
ENSMFAG00000037978	ZFAND5	0.293264	0.0107677	Regulatory		protein_coding	zinc finger AN1-type containing 5
ENSMFAG00000030020	SCAPER	0.292958	0.0377444			protein_coding	S-phase cyclin A associated protein in the ER
ENSMFAG00000035688	ITPR2	0.292544	0.0173746			protein_coding	inositol 1,4,5-trisphosphate receptor type 2
ENSMFAG00000004345	GTPBP3	0.292431	0.0495044			protein_coding	GTP binding protein 3, mitochondrial
ENSMFAG00000030090	PKN2	0.292125	0.0132529			protein_coding	protein kinase N2
ENSMFAG00000002000	AMBRA1	0.291711	0.0169439			protein_coding	autophagy and beclin 1 regulator 1
ENSMFAG00000006822	SLC20A1	0.291708	0.0369117			protein_coding	solute carrier family 20 member 1
ENSMFAG00000001381	BRF1	0.2917	0.00788216			protein_coding	BRF1 RNA polymerase III transcription initiation factor subunit
ENSMFAG00000042871	PRDM15	0.291664	0.00955689			protein_coding	PR/SET domain 15
ENSMFAG00000031151	SPRED2	0.291598	0.0245702			protein_coding	sprouty related EVH1 domain containing 2
ENSMFAG00000041927	ZNF653	0.291203	0.00940836			protein_coding	zinc finger protein 653
ENSMFAG00000000614	ADGRE5	0.291129	0.0266202			protein_coding	adhesion G protein-coupled receptor E5
ENSMFAG00000001370	APOL5	0.291096	0.026985			protein_coding	apolipoprotein L5
ENSMFAG00000033450	PLEKHM3	0.290908	0.0270058			protein_coding	pleckstrin homology domain containing M3
ENSMFAG00000033670	ANKS3	0.290665	0.0267256			protein_coding	ankyrin repeat and sterile alpha motif domain containing 3
ENSMFAG00000037127	WWOX	0.290578	0.0380051			protein_coding	WW domain containing oxidoreductase
ENSMFAG00000037551	SNX21	0.29052	0.0239151			protein_coding	sorting nexin family member 21
ENSMFAG00000003269	C19orf54	0.289884	0.0323091			protein_coding	chromosome 19 open reading frame 54
ENSMFAG00000015002	PIEZO1	0.289682	0.028806	Regulatory		protein_coding	piezo type mechanosensitive ion channel component 1
ENSMFAG00000034615	AFF4	0.289622	0.0162299	Proinflammatory		protein_coding	AF4/FMR2 family member 4
ENSMFAG00000035642	CDKAL1	0.289116	0.0131524			protein_coding	CDK5 regulatory subunit associated protein 1 like 1
ENSMFAG00000039558	TRMT61B	0.288916	0.038336			protein_coding	tRNA methyltransferase 61B
ENSMFAG00000028385	RNF123	0.288707	0.0117655			protein_coding	ring finger protein 123
ENSMFAG00000032477	EXOC4	0.288675	0.0255912			protein_coding	exocyst complex component 4
ENSMFAG00000038733	ARHGAP4	0.288582	0.0107879			protein_coding	Rho GTPase activating protein 4
ENSMFAG00000001398	MIB2	0.288581	0.0115053			protein_coding	mindbomb E3 ubiquitin protein ligase 2
ENSMFAG00000027455		0.288545	0.0200016			protein_coding	leucine-rich repeat-containing protein 37A2
ENSMFAG00000034167	SAP130	0.28847	0.0134627			protein_coding	Sin3A associated protein 130
ENSMFAG00000033455	SRGAP3	0.287941	0.0378661			protein_coding	SLIT-ROBO Rho GTPase activating protein 3
ENSMFAG00000000688	NOTCH1	0.287703	0.0261184			protein_coding	notch receptor 1
ENSMFAG00000045378	C1orf35	0.287366	0.0202319			protein_coding	chromosome 1 open reading frame 35
ENSMFAG00000045124	UVSSA	0.287259	0.0383765			protein_coding	UV stimulated scaffold protein A
ENSMFAG00000036060	ZC3H3	0.287222	0.0217121			protein_coding	zinc finger CCCH-type containing 3
ENSMFAG00000043917	USP11	0.287182	0.0133677			protein_coding	ubiquitin specific peptidase 11
ENSMFAG00000007311	GSAP	0.28713	0.0218304			protein_coding	gamma-secretase activating protein
ENSMFAG00000023107	RIN3	0.28707	0.0102478			protein_coding	Ras and Rab interactor 3
ENSMFAG00000000278	RABEP2	0.287066	0.0106774			protein_coding	rabaptin, RAB GTPase binding effector protein 2
ENSMFAG00000000530	USP42	0.286833	0.0205437			protein_coding	ubiquitin specific peptidase 42
ENSMFAG00000002666	MYSM1	0.286799	0.0085795			protein_coding	Myb like, SWIRM and MPN domains 1
ENSMFAG00000044174	DDX39A	0.286631	0.0208928			protein_coding	DExD-box helicase 39A
ENSMFAG00000002812	GBF1	0.28642	0.0176912			protein_coding	golgi brefeldin A resistant guanine nucleotide exchange factor 1
ENSMFAG00000043358	C15orf39	0.286068	0.0262912			protein_coding	chromosome 15 open reading frame 39
ENSMFAG00000010807	PHLPP1	0.285961	0.0209872			protein_coding	PH domain and leucine rich repeat protein phosphatase 1
ENSMFAG00000041669	PIKFYVE	0.285686	0.00955689			protein_coding	phosphoinositide kinase, FYVE-type zinc finger containing
ENSMFAG00000035395	KLF9	0.285566	0.0457749			protein_coding	Kruppel like factor 9
ENSMFAG00000036405	WDFY3	0.285516	0.0279112			protein_coding	WD repeat and FYVE domain containing 3
ENSMFAG00000037347	DUSP16	0.285474	0.040681			protein_coding	dual specificity phosphatase 16
ENSMFAG00000041671	CYB5D2	0.285115	0.0350549			protein_coding	cytochrome b5 domain containing 2
ENSMFAG00000030180	LIMD1	0.284783	0.0341493			protein_coding	LIM domains containing 1
ENSMFAG00000002088	ELMO1	0.284749	0.0169636			protein_coding	engulfment and cell motility 1
ENSMFAG00000025613	CPEB3	0.284236	0.0351312			protein_coding	cytoplasmic polyadenylation element binding protein 3
ENSMFAG00000042888	SETD5	0.284116	0.0141021			protein_coding	SET domain containing 5
ENSMFAG00000002221	TCAP	0.283787	0.0425361			protein_coding	titin-cap
ENSMFAG00000029400	ASXL1	0.283578	0.0105975			protein_coding	ASXL transcriptional regulator 1
ENSMFAG00000034586	PEX6	0.283189	0.0107677			protein_coding	peroxisomal biogenesis factor 6
ENSMFAG00000036159	CCDC57	0.28315	0.0470056			protein_coding	coiled-coil domain containing 57
ENSMFAG00000000844		0.282971	0.0200016			protein_coding	NRDE-2, necessary for RNA interference, domain containing
ENSMFAG00000033425	MYLIP	0.282837	0.0423682			protein_coding	myosin regulatory light chain interacting protein
ENSMFAG00000034370	HERPUD1	0.282801	0.0251574			protein_coding	homocysteine inducible ER protein with ubiquitin like domain 1
ENSMFAG00000030013	RF00272	0.282786	0.0463399			snoRNA	small nucleolar RNA, H/ACA box 67
ENSMFAG00000042817	FAM214A	0.28269	0.00705105			protein_coding	family with sequence similarity 214 member A
ENSMFAG00000046135	MYO9B	0.282325	0.0124137			protein_coding	myosin IXB
ENSMFAG00000000102	LRIG2	0.282191	0.0117964			protein_coding	leucine rich repeats and immunoglobulin like domains 2
ENSMFAG00000038075		0.28218	0.0115053			protein_coding	chromosome X open reading frame, human CXorf40B
ENSMFAG00000037389	TUBGCP6	0.28201	0.0222222			protein_coding	tubulin gamma complex associated protein 6
ENSMFAG00000033217	SLC35C1	0.281781	0.0134627			protein_coding	solute carrier family 35 member C1
ENSMFAG00000042529	UAP1	0.281632	0.0104416			protein_coding	UDP-N-acetylglucosamine pyrophosphorylase 1
ENSMFAG00000000211	TTLL4	0.281519	0.02338	Proinflammatory		protein_coding	tubulin tyrosine ligase like 4
ENSMFAG00000040759	ZNFX1	0.281456	0.0383881			protein_coding	zinc finger NFX1-type containing 1
ENSMFAG00000038558		0.281384	0.0243348			protein_coding	symplekin
ENSMFAG00000002357	CWC25	0.280716	0.0245649	Proinflammatory		protein_coding	CWC25 spliceosome associated protein homolog
ENSMFAG00000031206	MGRN1	0.27971	0.00955689			protein_coding	mahogunin ring finger 1
ENSMFAG00000021920	NFATC1	0.279666	0.0207417	Regulatory		protein_coding	nuclear factor of activated T cells 1
ENSMFAG00000042005	SAP25	0.279633	0.0192395			protein_coding	Sin3A associated protein 25
ENSMFAG00000042433	TRAM2	0.279585	0.0278296			protein_coding	translocation associated membrane protein 2
ENSMFAG00000000346	HAAO	0.27946	0.0245137			protein_coding	3-hydroxyanthranilate 3,4-dioxygenase
ENSMFAG00000045761	SMYD3	0.279387	0.0249482			protein_coding	SET and MYND domain containing 3
ENSMFAG00000001167	GNL1	0.279109	0.00964899			protein_coding	G protein nucleolar 1 (putative)
ENSMFAG00000026826		0.279	0.0156965			protein_coding	neuralized E3 ubiquitin protein ligase 4
ENSMFAG00000002865	POU2F1	0.27889	0.0134088			protein_coding	POU class 2 homeobox 1
ENSMFAG00000045298	TRMO	0.278868	0.0306972			protein_coding	tRNA methyltransferase O
ENSMFAG00000032230	IKBKG	0.278723	0.0200731			protein_coding	inhibitor of nuclear factor kappa B kinase regulatory subunit gamma
ENSMFAG00000011842	TUT4	0.278569	0.0121197			protein_coding	terminal uridylyl transferase 4
ENSMFAG00000034377	CREBBP	0.278303	0.0127299			protein_coding	CREB binding protein
ENSMFAG00000001130	TEP1	0.278018	0.0315133			protein_coding	telomerase associated protein 1
ENSMFAG00000001377	SIN3B	0.277944	0.0172574	Proinflammatory		protein_coding	SIN3 transcription regulator family member B
ENSMFAG00000004075	FCHSD2	0.277874	0.0124115	Proinflammatory		protein_coding	FCH and double SH3 domains 2
ENSMFAG00000000797	SFPQ	0.277631	0.00624097	Proinflammatory		protein_coding	splicing factor proline and glutamine rich
ENSMFAG00000020154	AP4B1	0.277574	0.0180067			protein_coding	adaptor related protein complex 4 subunit beta 1
ENSMFAG00000035753	SAMD4B	0.277565	0.0171496			protein_coding	sterile alpha motif domain containing 4B
ENSMFAG00000021762	TUBB4B	0.277539	0.0337379			protein_coding	tubulin beta 4B class IVb
ENSMFAG00000035404	FBXW8	0.27718	0.0267256			protein_coding	F-box and WD repeat domain containing 8
ENSMFAG00000001732	DOCK5	0.277137	0.0277206	Regulatory		protein_coding	dedicator of cytokinesis 5
ENSMFAG00000012059	RF01294	0.277069	0.0390824			snoRNA	small Cajal body-specific RNA 12
ENSMFAG00000001665	DNAJC5	0.277028	0.028734			protein_coding	DnaJ heat shock protein family (Hsp40) member C5
ENSMFAG00000043909	IGHMBP2	0.276835	0.0244622			protein_coding	immunoglobulin mu DNA binding protein 2
ENSMFAG00000035610	AGO3	0.276494	0.0196765			protein_coding	argonaute RISC catalytic component 3
ENSMFAG00000042991	GLI4	0.276437	0.0230871			protein_coding	GLI family zinc finger 4
ENSMFAG00000002080	GEN1	0.276399	0.029792			protein_coding	GEN1 Holliday junction 5' flap endonuclease
ENSMFAG00000038791	GAS2L1	0.276275	0.0340732			protein_coding	growth arrest specific 2 like 1
ENSMFAG00000043825		0.276083	0.0407017			protein_coding	family with sequence similarity 72 member A
ENSMFAG00000031412	ENKD1	0.275735	0.0169863			protein_coding	enkurin domain containing 1
ENSMFAG00000029752	ATXN1L	0.275467	0.0163011			protein_coding	ataxin 1 like
ENSMFAG00000002090	TPM2	0.275454	0.0292779			protein_coding	tropomyosin 2
ENSMFAG00000000238	ARMC2	0.274845	0.0252372			protein_coding	armadillo repeat containing 2
ENSMFAG00000030488	TRIM56	0.274827	0.0277206			protein_coding	tripartite motif containing 56
ENSMFAG00000038925	PLPP6	0.274607	0.0212339			protein_coding	phospholipid phosphatase 6
ENSMFAG00000037051	SLC24A3	0.274415	0.0169636			protein_coding	solute carrier family 24 member 3
ENSMFAG00000001906	CUL9	0.274217	0.0218381			protein_coding	cullin 9
ENSMFAG00000040845	NUFIP2	0.273506	0.0113365	Proinflammatory		protein_coding	nuclear FMR1 interacting protein 2
ENSMFAG00000039420	RARS2	0.273296	0.024651			protein_coding	arginyl-tRNA synthetase 2, mitochondrial
ENSMFAG00000044368	PCNX3	0.272613	0.0166277			protein_coding	pecanex 3
ENSMFAG00000042055	TRIM13	0.272437	0.035601			protein_coding	tripartite motif containing 13
ENSMFAG00000032313	TMCO4	0.272324	0.0344536			protein_coding	transmembrane and coiled-coil domains 4
ENSMFAG00000036342	DDX31	0.272162	0.02338			protein_coding	DEAD-box helicase 31
ENSMFAG00000003823	NBAS	0.272148	0.0296299			protein_coding	neuroblastoma amplified sequence
ENSMFAG00000030926	FCHO2	0.272106	0.015414			protein_coding	FCH domain only 2
ENSMFAG00000002260	TAS1R3	0.27174	0.0322891			protein_coding	taste 1 receptor member 3
ENSMFAG00000041379	ARID5A	0.271683	0.0225062			protein_coding	AT-rich interaction domain 5A
ENSMFAG00000032262	SLC3A2	0.271616	0.0101859			protein_coding	solute carrier family 3 member 2
ENSMFAG00000030738	SLFN12	0.271529	0.0140362			protein_coding	schlafen family member 12
ENSMFAG00000002438	CDK16	0.271362	0.0115053			protein_coding	cyclin dependent kinase 16
ENSMFAG00000003688	AMT	0.270957	0.0197968			protein_coding	aminomethyltransferase
ENSMFAG00000030480	HEXIM1	0.270849	0.045649			protein_coding	HEXIM P-TEFb complex subunit 1
ENSMFAG00000041011		0.270816	0.0168695			protein_coding	zinc finger AN1-type containing 2A
ENSMFAG00000002869	ADAMTSL4	0.27064	0.0453061			protein_coding	ADAMTS like 4
ENSMFAG00000002054	CACNB1	0.270613	0.0299422			protein_coding	calcium voltage-gated channel auxiliary subunit beta 1
ENSMFAG00000032261	ARHGEF1	0.270487	0.0171496	Regulatory		protein_coding	Rho guanine nucleotide exchange factor 1
ENSMFAG00000045920	ZNF341	0.270212	0.0267963			protein_coding	zinc finger protein 341
ENSMFAG00000040751	XPNPEP3	0.2702	0.0205376			protein_coding	X-prolyl aminopeptidase 3
ENSMFAG00000043639	RAPGEF2	0.269964	0.0140139			protein_coding	Rap guanine nucleotide exchange factor 2
ENSMFAG00000039706	SAFB2	0.269914	0.0102478			protein_coding	scaffold attachment factor B2
ENSMFAG00000032505	C2CD2	0.269835	0.0252644			protein_coding	C2 calcium dependent domain containing 2
ENSMFAG00000036650	RUNX2	0.2692	0.0425493	Proinflammatory		protein_coding	RUNX family transcription factor 2
ENSMFAG00000035692	ZNF224	0.269196	0.0107677			protein_coding	zinc finger protein 224
ENSMFAG00000036439	ZNF460	0.268955	0.0206598			protein_coding	zinc finger protein 460
ENSMFAG00000031585	DENND1A	0.268827	0.0365421			protein_coding	DENN domain containing 1A
ENSMFAG00000039690	MUM1	0.268824	0.0140139			protein_coding	PWWP domain containing 3A, DNA repair factor
ENSMFAG00000037769	AP1G1	0.268714	0.0364903			protein_coding	adaptor related protein complex 1 subunit gamma 1
ENSMFAG00000001700	PTRH1	0.268698	0.0148809			protein_coding	peptidyl-tRNA hydrolase 1 homolog
ENSMFAG00000032794	HEXIM2	0.268601	0.0252644			protein_coding	HEXIM P-TEFb complex subunit 2
ENSMFAG00000038500	AP1G2	0.268566	0.0146695			protein_coding	adaptor related protein complex 1 subunit gamma 2
ENSMFAG00000002058	MGAT5	0.268467	0.0335612			protein_coding	alpha-1,6-mannosylglycoprotein 6-beta-N-acetylglucosaminyltransferase
ENSMFAG00000032425		0.268214	0.0236594			protein_coding	laccase domain containing 1
ENSMFAG00000037545	ATG16L1	0.267316	0.00990885			protein_coding	autophagy related 16 like 1
ENSMFAG00000001389	PI4KA	0.267065	0.0204886			protein_coding	phosphatidylinositol 4-kinase alpha
ENSMFAG00000039162	COX20	0.266959	0.025652			protein_coding	cytochrome c oxidase assembly factor COX20
ENSMFAG00000045931	EVI5L	0.266878	0.0236723			protein_coding	ecotropic viral integration site 5 like
ENSMFAG00000045259	FAM193A	0.265991	0.0246138			protein_coding	family with sequence similarity 193 member A
ENSMFAG00000001463	UCKL1	0.26599	0.0289995			protein_coding	uridine-cytidine kinase 1 like 1
ENSMFAG00000034352		0.265509	0.0161197			protein_coding
ENSMFAG00000033954	FCHSD1	0.265313	0.0118249			protein_coding	FCH and double SH3 domains 1
ENSMFAG00000035876	ITPKB	0.265122	0.0140957	Regulatory		protein_coding	inositol-trisphosphate 3-kinase B
ENSMFAG00000031960	DOP1A	0.265097	0.0392834			protein_coding	DOP1 leucine zipper like protein A
ENSMFAG00000046218	LRRC45	0.265072	0.0248914			protein_coding	leucine rich repeat containing 45
ENSMFAG00000036941	DNAJC4	0.264986	0.017077			protein_coding	DnaJ heat shock protein family (Hsp40) member C4
ENSMFAG00000033390	WDPCP	0.264508	0.00788216			protein_coding	WD repeat containing planar cell polarity effector
ENSMFAG00000001026	WHAMM	0.264273	0.0405948			protein_coding	WASP homolog associated with actin, golgi membranes and microtubules
ENSMFAG00000037973	COX7A1	0.263633	0.0285045			protein_coding	cytochrome c oxidase subunit 7A1
ENSMFAG00000035438	MED13L	0.263439	0.011527			protein_coding	mediator complex subunit 13L
ENSMFAG00000044362	NAT9	0.263134	0.0171496			protein_coding	N-acetyltransferase 9 (putative)
ENSMFAG00000034836	RF00004	0.263088	0.0175455			snRNA	U2 spliceosomal RNA
ENSMFAG00000037478	SCLT1	0.26299	0.0124101			protein_coding	sodium channel and clathrin linker 1
ENSMFAG00000039475	TRRAP	0.262894	0.0288813			protein_coding	transformation/transcription domain associated protein
ENSMFAG00000041829	MAU2	0.262827	0.0110859			protein_coding	MAU2 sister chromatid cohesion factor
ENSMFAG00000046144	PITPNM1	0.26273	0.0170121			protein_coding	phosphatidylinositol transfer protein membrane associated 1
ENSMFAG00000033101	COG3	0.262245	0.0093539			protein_coding	component of oligomeric golgi complex 3
ENSMFAG00000032166	TSC2	0.262094	0.0207327			protein_coding	TSC complex subunit 2
ENSMFAG00000033121		0.262036	0.036812			protein_coding
ENSMFAG00000042603	PDSS1	0.261878	0.0175212			protein_coding	decaprenyl diphosphate synthase subunit 1
ENSMFAG00000030014	RF01268	0.261767	0.0093539			scaRNA
ENSMFAG00000043284	MTHFR	0.26168	0.0433825			protein_coding	methylenetetrahydrofolate reductase
ENSMFAG00000029481	B3GNT2	0.261119	0.0475104			protein_coding	UDP-GlcNAc:betaGal beta-1,3-N-acetylglucosaminyltransferase 2
ENSMFAG00000001964	TXNDC16	0.261106	0.033969			protein_coding	thioredoxin domain containing 16
ENSMFAG00000002797	PPP6R2	0.260923	0.00943688			protein_coding	protein phosphatase 6 regulatory subunit 2
ENSMFAG00000039824	SNRNP70	0.260643	0.0130265	Proinflammatory		protein_coding	small nuclear ribonucleoprotein U1 subunit 70
ENSMFAG00000042193	RGP1	0.260252	0.0247725			protein_coding	RGP1 homolog, RAB6A GEF complex partner 1
ENSMFAG00000033923	STK10	0.260248	0.0173695			protein_coding	serine/threonine kinase 10
ENSMFAG00000044188		0.260094	0.0152401			protein_coding	zinc finger protein 682-like
ENSMFAG00000045919	ATAD2B	0.260056	0.0137923			protein_coding	ATPase family AAA domain containing 2B
ENSMFAG00000010896	ZNF251	0.259946	0.0299904			protein_coding	zinc finger protein 251
ENSMFAG00000044303	MRRF	0.259935	0.02338			protein_coding	mitochondrial ribosome recycling factor
ENSMFAG00000039034	PCIF1	0.259777	0.0105779			protein_coding	PDX1 C-terminal inhibiting factor 1
ENSMFAG00000039593	EP300	0.259466	0.0209251			protein_coding	E1A binding protein p300
ENSMFAG00000034332	RABGAP1L	0.259173	0.0118342	Regulatory		protein_coding	RAB GTPase activating protein 1 like
ENSMFAG00000034101	MAP3K14	0.258982	0.0109752			protein_coding	mitogen-activated protein kinase kinase kinase 14
ENSMFAG00000045989	ZNF316	0.258794	0.0438915			protein_coding	zinc finger protein 316
ENSMFAG00000037065	PKD1	0.258537	0.0305767			protein_coding	polycystin 1, transient receptor potential channel interacting
ENSMFAG00000042313	SCRIB	0.258335	0.0192395			protein_coding	scribble planar cell polarity protein
ENSMFAG00000046153	FAAH	0.258016	0.0441818			protein_coding	fatty acid amide hydrolase
ENSMFAG00000011311		0.257889	0.0239964			protein_coding
ENSMFAG00000037989	PRDM2	0.257804	0.0264471	Proinflammatory		protein_coding	PR/SET domain 2
ENSMFAG00000008338	INTS3	0.25778	0.0143691			protein_coding	integrator complex subunit 3
ENSMFAG00000030025		0.257248	0.0145262			protein_coding	protein kinase C eta
ENSMFAG00000041899	BCAS3	0.257202	0.022446			protein_coding	BCAS3 microtubule associated cell migration factor
ENSMFAG00000037064		0.257172	0.0133677			protein_coding	autophagy related 9A
ENSMFAG00000045145	IFFO1	0.257077	0.0336087			protein_coding	intermediate filament family orphan 1
ENSMFAG00000003334	MOB3A	0.256935	0.0420712			protein_coding	MOB kinase activator 3A
ENSMFAG00000033927	RBM4B	0.256857	0.0129039			protein_coding	RNA binding motif protein 4B
ENSMFAG00000038715	NFX1	0.25684	0.00727223			protein_coding	nuclear transcription factor, X-box binding 1
ENSMFAG00000015722	THADA	0.256574	0.0200731			protein_coding	THADA armadillo repeat containing
ENSMFAG00000001432		0.256494	0.017783			protein_coding	DNA polymerase delta 3, accessory subunit
ENSMFAG00000040203	DSTYK	0.256186	0.0261816			protein_coding	dual serine/threonine and tyrosine protein kinase
ENSMFAG00000039276	DOT1L	0.256063	0.0254944			protein_coding	DOT1 like histone lysine methyltransferase
ENSMFAG00000030983	VAV3	0.255948	0.0085795	Proinflammatory		protein_coding	vav guanine nucleotide exchange factor 3
ENSMFAG00000003592	EVI5	0.255438	0.03019			protein_coding	ecotropic viral integration site 5
ENSMFAG00000045817	KDM6A	0.255328	0.0187137			protein_coding	lysine demethylase 6A
ENSMFAG00000026331	MUTYH	0.255272	0.0455117			protein_coding	mutY DNA glycosylase
ENSMFAG00000030551	CDIP1	0.255144	0.0456562			protein_coding	cell death inducing p53 target 1
ENSMFAG00000045981	FBXW7	0.255103	0.00955689			protein_coding	F-box and WD repeat domain containing 7
ENSMFAG00000041125	FOXK1	0.25498	0.0239173			protein_coding	forkhead box K1
ENSMFAG00000035356	DVL3	0.254184	0.0110677			protein_coding	dishevelled segment polarity protein 3
ENSMFAG00000000249	C12orf66	0.254168	0.0245598			protein_coding	chromosome 12 open reading frame 66
ENSMFAG00000039920	MTOR	0.254107	0.0240983			protein_coding	mechanistic target of rapamycin kinase
ENSMFAG00000044872	PLCB3	0.254038	0.0192395			protein_coding	phospholipase C beta 3
ENSMFAG00000040147	ERN1	0.253961	0.0161354			protein_coding	endoplasmic reticulum to nucleus signaling 1
ENSMFAG00000028679	ARL15	0.253958	0.0446204	Proinflammatory		protein_coding	ADP ribosylation factor like GTPase 15
ENSMFAG00000041564	SIGIRR	0.253441	0.0389675			protein_coding	single Ig and TIR domain containing
ENSMFAG00000042593	RBM39	0.253422	0.00893433			protein_coding	RNA binding motif protein 39
ENSMFAG00000046161	AKNA	0.253031	0.0253305	Proinflammatory		protein_coding	AT-hook transcription factor
ENSMFAG00000033430	FBXL20	0.252933	0.0204509			protein_coding	F-box and leucine rich repeat protein 20
ENSMFAG00000003588	GCN1	0.252747	0.0195154			protein_coding	GCN1 activator of EIF2AK4
ENSMFAG00000039818	NAA25	0.252185	0.0107677			protein_coding	N(alpha)-acetyltransferase 25, NatB auxiliary subunit
ENSMFAG00000044315	GGA1	0.251449	0.0109752			protein_coding	golgi associated, gamma adaptin ear containing, ARF binding protein 1
ENSMFAG00000003052	ANKS1A	0.251435	0.0383988			protein_coding	ankyrin repeat and sterile alpha motif domain containing 1A
ENSMFAG00000034162	WDR74	0.251376	0.0115053			protein_coding	WD repeat domain 74
ENSMFAG00000036952	NACC1	0.25133	0.0213402			protein_coding	nucleus accumbens associated 1
ENSMFAG00000039056	ZNF692	0.25123	0.0238478			protein_coding	zinc finger protein 692
ENSMFAG00000030245	ZNF787	0.25101	0.0107879			protein_coding	zinc finger protein 787
ENSMFAG00000030642	MAP4K4	0.250943	0.0200016	Proinflammatory		protein_coding	mitogen-activated protein kinase kinase kinase kinase 4
ENSMFAG00000033464	BBC3	0.250853	0.030987			protein_coding	BCL2 binding component 3
ENSMFAG00000034968	FANCC	0.250837	0.023762			protein_coding	FA complementation group C
ENSMFAG00000033111	PGS1	0.250329	0.04443	Proinflammatory		protein_coding	phosphatidylglycerophosphate synthase 1
ENSMFAG00000029801	TTLL5	0.250264	0.0431458			protein_coding	tubulin tyrosine ligase like 5
ENSMFAG00000000895		0.25025	0.0411184			protein_coding	transmembrane protein 69
ENSMFAG00000045635		0.249985	0.0368816			protein_coding	GRAM domain containing 4
ENSMFAG00000043943	TNRC6C	0.249778	0.0109752			protein_coding	trinucleotide repeat containing adaptor 6C
ENSMFAG00000041519	LPP	0.249283	0.03019			protein_coding	LIM domain containing preferred translocation partner in lipoma
ENSMFAG00000033725	RC3H1	0.249066	0.0355359			protein_coding	ring finger and CCCH-type domains 1
ENSMFAG00000043975	NEK1	0.248927	0.0391016			protein_coding	NIMA related kinase 1
ENSMFAG00000001515		0.248528	0.0493764			protein_coding
ENSMFAG00000041463		0.248339	0.0320636			protein_coding	lysine methyltransferase 2A
ENSMFAG00000035989	SLC10A3	0.248185	0.0154048			protein_coding	solute carrier family 10 member 3
ENSMFAG00000004188	ZNF783	0.247857	0.033683			protein_coding	zinc finger family member 783
ENSMFAG00000044480	ABR	0.247833	0.0213402			protein_coding	ABR activator of RhoGEF and GTPase
ENSMFAG00000040019	ARHGEF10L	0.247788	0.0319777			protein_coding	Rho guanine nucleotide exchange factor 10 like
ENSMFAG00000037713	MTA3	0.247625	0.043439			protein_coding	metastasis associated 1 family member 3
ENSMFAG00000030176	ZC3HC1	0.247599	0.0274303			protein_coding	zinc finger C3HC-type containing 1
ENSMFAG00000042345	GATAD2B	0.247334	0.0371375	Proinflammatory		protein_coding	GATA zinc finger domain containing 2B
ENSMFAG00000044357	VPS8	0.247294	0.0116421			protein_coding	VPS8 subunit of CORVET complex
ENSMFAG00000043596	POGZ	0.246964	0.0159714	Proinflammatory		protein_coding	pogo transposable element derived with ZNF domain
ENSMFAG00000044794	DIAPH2	0.246797	0.022981			protein_coding	diaphanous related formin 2
ENSMFAG00000008510	HGS	0.246709	0.00893433			protein_coding	hepatocyte growth factor-regulated tyrosine kinase substrate
ENSMFAG00000044675	OXSM	0.246618	0.035601			protein_coding	3-oxoacyl-ACP synthase, mitochondrial
ENSMFAG00000039777	KDM5C	0.246525	0.0133857			protein_coding	lysine demethylase 5C
ENSMFAG00000031265	RNF169	0.24649	0.0135396			protein_coding	ring finger protein 169
ENSMFAG00000045738	TBC1D25	0.246106	0.0202447			protein_coding	TBC1 domain family member 25
ENSMFAG00000036338	KAT7	0.245875	0.00613448			protein_coding	lysine acetyltransferase 7
ENSMFAG00000023256	RF00092	0.245814	0.0499914			snoRNA	Small nucleolar RNA SNORA63
ENSMFAG00000003282	TLE3	0.245698	0.025447	Proinflammatory		protein_coding	TLE family member 3, transcriptional corepressor
ENSMFAG00000034393	SLCO3A1	0.24562	0.0138517	Proinflammatory		protein_coding	solute carrier organic anion transporter family member 3A1
ENSMFAG00000008096		0.245476	0.0243357			protein_coding
ENSMFAG00000036565	PSTK	0.245372	0.0261562			protein_coding	phosphoseryl-tRNA kinase
ENSMFAG00000041567	ANKHD1-EIF4EBP3	0.244835	0.026977			protein_coding	ankyrin repeat and KH domain-containing protein 1
ENSMFAG00000043893	UBALD1	0.244411	0.0114071			protein_coding	UBA like domain containing 1
ENSMFAG00000040517		0.244266	0.00788216			protein_coding	DDB1 and CUL4 associated factor 8
ENSMFAG00000030723	KANSL1	0.243759	0.0124874			protein_coding	KAT8 regulatory NSL complex subunit 1
ENSMFAG00000033187	ZNF79	0.243632	0.0269688			protein_coding	zinc finger protein 79
ENSMFAG00000038001	ACOT11	0.243598	0.0499513			protein_coding	acyl-CoA thioesterase 11
ENSMFAG00000038435	GLCCI1	0.243481	0.023693			protein_coding	glucocorticoid induced 1
ENSMFAG00000031058	PRCC	0.243453	0.00868522			protein_coding	proline rich mitotic checkpoint control factor
ENSMFAG00000027256	ZC3H10	0.243315	0.0292733			protein_coding	zinc finger CCCH-type containing 10
ENSMFAG00000030383	SLC25A19	0.243041	0.0346156			protein_coding	solute carrier family 25 member 19
ENSMFAG00000003719	PTK2B	0.243013	0.0179871			protein_coding	protein tyrosine kinase 2 beta
ENSMFAG00000037668	SCAF4	0.242523	0.0203111			protein_coding	SR-related CTD associated factor 4
ENSMFAG00000027720	PWWP2A	0.242422	0.0120778			protein_coding	PWWP domain containing 2A
ENSMFAG00000034645	RAB11FIP3	0.242255	0.0181568			protein_coding	RAB11 family interacting protein 3
ENSMFAG00000034391	URB1	0.242151	0.0171598			protein_coding	URB1 ribosome biogenesis homolog
ENSMFAG00000046230	ZBTB20	0.24207	0.0252644			protein_coding	zinc finger and BTB domain containing 20
ENSMFAG00000045389	ERO1B	0.241763	0.0323985			protein_coding	endoplasmic reticulum oxidoreductase 1 beta
ENSMFAG00000045998	ANTXR2	0.241719	0.0167181	Proinflammatory		protein_coding	ANTXR cell adhesion molecule 2
ENSMFAG00000032865	SH2B2	0.24138	0.0420402			protein_coding	SH2B adaptor protein 2
ENSMFAG00000003007	MEPCE	0.241039	0.0200731			protein_coding	methylphosphate capping enzyme
ENSMFAG00000040352	SUGP2	0.240798	0.0162952			protein_coding	SURP and G-patch domain containing 2
ENSMFAG00000031886	CLCN7	0.240422	0.0379622			protein_coding	chloride voltage-gated channel 7
ENSMFAG00000002638	SF3A2	0.240286	0.0124874			protein_coding	splicing factor 3a subunit 2
ENSMFAG00000045736	TRERF1	0.240108	0.0178227			protein_coding	transcriptional regulating factor 1
ENSMFAG00000008281	MED23	0.239961	0.0101859			protein_coding	mediator complex subunit 23
ENSMFAG00000033127	CDK17	0.239784	0.0107677			protein_coding	cyclin dependent kinase 17
ENSMFAG00000039623	NPC1	0.2396	0.0416466			protein_coding	NPC intracellular cholesterol transporter 1
ENSMFAG00000000258	PREX1	0.239561	0.0180576			protein_coding	phosphatidylinositol-3,4,5-trisphosphate dependent Rac exchange factor 1
ENSMFAG00000041434	ARSA	0.239498	0.0133857			protein_coding	arylsulfatase A
ENSMFAG00000001957	DMTF1	0.239431	0.0126468			protein_coding	cyclin D binding myb like transcription factor 1
ENSMFAG00000039424	ARAP1	0.239356	0.0267171			protein_coding	ArfGAP with RhoGAP domain, ankyrin repeat and PH domain 1
ENSMFAG00000002662	PRRC2B	0.239266	0.0207845	Proinflammatory		protein_coding	proline rich coiled-coil 2B
ENSMFAG00000035913	MINK1	0.23924	0.0352319	Proinflammatory		protein_coding	misshapen like kinase 1
ENSMFAG00000032293		0.2389	0.0287822			protein_coding
ENSMFAG00000002788	MCM9	0.23853	0.0192515			protein_coding	minichromosome maintenance 9 homologous recombination repair factor
ENSMFAG00000038250	E4F1	0.238431	0.0153031			protein_coding	E4F transcription factor 1
ENSMFAG00000044861	PHF20	0.238033	0.0124115			protein_coding	PHD finger protein 20
ENSMFAG00000045078		0.237997	0.0420932			protein_coding	TEPSIN adaptor related protein complex 4 accessory protein
ENSMFAG00000000928	GGA3	0.237896	0.0135396			protein_coding	golgi associated, gamma adaptin ear containing, ARF binding protein 3
ENSMFAG00000003953	PTOV1	0.237496	0.0111257			protein_coding	PTOV1 extended AT-hook containing adaptor protein
ENSMFAG00000037854	HECA	0.23747	0.00788216			protein_coding	hdc homolog, cell cycle regulator
ENSMFAG00000002861	DGKD	0.237008	0.0342577	Proinflammatory		protein_coding	diacylglycerol kinase delta
ENSMFAG00000037936	BRMS1L	0.236935	0.0137366			protein_coding	BRMS1 like transcriptional repressor
ENSMFAG00000031725	RUNX3	0.236688	0.0262634			protein_coding	RUNX family transcription factor 3
ENSMFAG00000043628	DPY19L3	0.236566	0.0420402			protein_coding	dpy-19 like C-mannosyltransferase 3
ENSMFAG00000041414	CSNK1D	0.236528	0.0192585			protein_coding	casein kinase 1 delta
ENSMFAG00000044702	SOCS7	0.236069	0.014524			protein_coding	suppressor of cytokine signaling 7
ENSMFAG00000038724	METTL16	0.236044	0.0211916			protein_coding	methyltransferase like 16
ENSMFAG00000039903	LSG1	0.23591	0.0487088			protein_coding	large 60S subunit nuclear export GTPase 1
ENSMFAG00000000305	PPP1R13B	0.235706	0.0369117			protein_coding	protein phosphatase 1 regulatory subunit 13B
ENSMFAG00000041314	RAD9A	0.235696	0.0193397			protein_coding	RAD9 checkpoint clamp component A
ENSMFAG00000037367	BAZ2B	0.235352	0.0270058	Proinflammatory		protein_coding	bromodomain adjacent to zinc finger domain 2B
ENSMFAG00000003778	KDM4C	0.235248	0.0170672			protein_coding	lysine demethylase 4C
ENSMFAG00000032830	CHD6	0.235141	0.0192632			protein_coding	chromodomain helicase DNA binding protein 6
ENSMFAG00000039128	AHCYL2	0.234857	0.0212281			protein_coding	adenosylhomocysteinase like 2
ENSMFAG00000002101	INTS6	0.234598	0.0116421			protein_coding	integrator complex subunit 6
ENSMFAG00000036398	RSRC2	0.233252	0.0118136			protein_coding	arginine and serine rich coiled-coil 2
ENSMFAG00000038589	PPRC1	0.232985	0.0280041			protein_coding	PPARG related coactivator 1
ENSMFAG00000007227	CFAP20	0.23291	0.0264971			protein_coding	cilia and flagella associated protein 20
ENSMFAG00000045657	CREBZF	0.232663	0.0186927			protein_coding	CREB/ATF bZIP transcription factor
ENSMFAG00000003862	TNRC6B	0.232187	0.0243699			protein_coding	trinucleotide repeat containing adaptor 6B
ENSMFAG00000038742	MTFR2	0.232056	0.0286008			protein_coding	mitochondrial fission regulator 2
ENSMFAG00000032531	WDR60	0.232034	0.0298795			protein_coding	WD repeat domain 60
ENSMFAG00000043806	TMEM104	0.231957	0.0369117			protein_coding	transmembrane protein 104
ENSMFAG00000037092	UBXN7	0.231429	0.00788216			protein_coding	UBX domain protein 7
ENSMFAG00000034620	RILPL2	0.231248	0.0185543	Regulatory		protein_coding	Rab interacting lysosomal protein like 2
ENSMFAG00000037882	ZBTB17	0.231235	0.0137119			protein_coding	zinc finger and BTB domain containing 17
ENSMFAG00000041643	TMEM63B	0.230843	0.0195835			protein_coding	transmembrane protein 63B
ENSMFAG00000042823	NUP214	0.230485	0.0258091	Proinflammatory		protein_coding	nucleoporin 214
ENSMFAG00000032882	SIDT2	0.230315	0.0129171			protein_coding	SID1 transmembrane family member 2
ENSMFAG00000038520	KIF13B	0.230226	0.0371125			protein_coding	kinesin family member 13B
ENSMFAG00000042265	ANKRD10	0.230212	0.00937108			protein_coding	ankyrin repeat domain 10
ENSMFAG00000026468	ZBTB5	0.230196	0.0447702			protein_coding	zinc finger and BTB domain containing 5
ENSMFAG00000041104	MCM3AP	0.230094	0.0217317			protein_coding	minichromosome maintenance complex component 3 associated protein
ENSMFAG00000002308	LZTR1	0.230017	0.022981			protein_coding	leucine zipper like transcription regulator 1
ENSMFAG00000044180	ACSF3	0.229856	0.0220619			protein_coding	acyl-CoA synthetase family member 3
ENSMFAG00000038826	TBC1D17	0.229676	0.0303712			protein_coding	TBC1 domain family member 17
ENSMFAG00000033885	HDAC10	0.229256	0.0344743			protein_coding	histone deacetylase 10
ENSMFAG00000003899	DGAT1	0.229006	0.0085795			protein_coding	diacylglycerol O-acyltransferase 1
ENSMFAG00000023157	MYO9A	0.228748	0.0239173			protein_coding	myosin IXA
ENSMFAG00000042173	DXO	0.228596	0.0109752			protein_coding	decapping exoribonuclease
ENSMFAG00000040222	NUP188	0.228542	0.0296299			protein_coding	nucleoporin 188
ENSMFAG00000035831	CREB3L2	0.228253	0.0346074	Proinflammatory		protein_coding	cAMP responsive element binding protein 3 like 2
ENSMFAG00000000414	NKTR	0.228133	0.0339401	Regulatory		protein_coding	natural killer cell triggering receptor
ENSMFAG00000046349	CNOT4	0.227749	0.0135396			protein_coding	CCR4-NOT transcription complex subunit 4
ENSMFAG00000027020	UBE2O	0.227569	0.0205115			protein_coding	ubiquitin conjugating enzyme E2 O
ENSMFAG00000031968	TFB1M	0.227492	0.0124874			protein_coding	transcription factor B1, mitochondrial
ENSMFAG00000002540	NECTIN2	0.227396	0.0373317			protein_coding	nectin cell adhesion molecule 2
ENSMFAG00000031880	STRIP1	0.227373	0.0085795			protein_coding	Macaca fascicularis striatin interacting protein 1 (STRIP1), mRNA.
ENSMFAG00000033275	FMNL1	0.227209	0.0288141	Proinflammatory		protein_coding	formin like 1
ENSMFAG00000031012	INTS6L	0.227162	0.0118824			protein_coding	integrator complex subunit 6 like
ENSMFAG00000044770	TYK2	0.227064	0.0230164	Proinflammatory		protein_coding	tyrosine kinase 2
ENSMFAG00000033122	SF1	0.226824	0.0155945	Proinflammatory		protein_coding	splicing factor 1
ENSMFAG00000045790	MAFK	0.226815	0.0317432			protein_coding	MAF bZIP transcription factor K
ENSMFAG00000038318	LUZP1	0.226685	0.0167198			protein_coding	leucine zipper protein 1
ENSMFAG00000045503	CLK3	0.226678	0.00788216			protein_coding	CDC like kinase 3
ENSMFAG00000032066	PLEC	0.226506	0.0344796			protein_coding	plectin
ENSMFAG00000001330	OSBPL7	0.226122	0.0324077			protein_coding	oxysterol binding protein like 7
ENSMFAG00000036347	HUWE1	0.225993	0.0210223			protein_coding	HECT, UBA and WWE domain containing E3 ubiquitin protein ligase 1
ENSMFAG00000009740	CCNL2	0.225773	0.0222473			protein_coding	cyclin L2
ENSMFAG00000031609	RBM5	0.225701	0.0162464	Proinflammatory		protein_coding	RNA binding motif protein 5
ENSMFAG00000029205	MGAT4B	0.225501	0.0145262			protein_coding	alpha-1,3-mannosyl-glycoprotein 4-beta-N-acetylglucosaminyltransferase B
ENSMFAG00000041835	CEP250	0.225494	0.0357186			protein_coding	centrosomal protein 250
ENSMFAG00000033094	SLC43A3	0.225321	0.0367075			protein_coding	solute carrier family 43 member 3
ENSMFAG00000031233	DGLUCY	0.225237	0.0345867			protein_coding	D-glutamate cyclase
ENSMFAG00000045997	ARRDC4	0.225236	0.029792	Proinflammatory		protein_coding	arrestin domain containing 4
ENSMFAG00000038023	ACD	0.225158	0.0189876			protein_coding	ACD shelterin complex subunit and telomerase recruitment factor
ENSMFAG00000035763	HCFC1	0.225094	0.0115053			protein_coding	host cell factor C1
ENSMFAG00000001111	TRPC1	0.225059	0.0280477			protein_coding	transient receptor potential cation channel subfamily C member 1
ENSMFAG00000002491	FGD3	0.225015	0.0272747			protein_coding	FYVE, RhoGEF and PH domain containing 3
ENSMFAG00000044668	RELCH	0.22491	0.0278359			protein_coding	RAB11 binding and LisH domain, coiled-coil and HEAT repeat containing
ENSMFAG00000032211	DGKZ	0.224889	0.0137119	Proinflammatory		protein_coding	diacylglycerol kinase zeta
ENSMFAG00000037161	KDM1B	0.224659	0.0186927			protein_coding	lysine demethylase 1B
ENSMFAG00000042431	FER	0.223751	0.0451194			protein_coding	FER tyrosine kinase
ENSMFAG00000030319	SBF1	0.223647	0.0340647			protein_coding	SET binding factor 1
ENSMFAG00000003743	LUC7L	0.223314	0.0246138			protein_coding	LUC7 like
ENSMFAG00000001615	RUBCN	0.223208	0.0299602			protein_coding	rubicon autophagy regulator
ENSMFAG00000030420		0.22299	0.0203312			protein_coding	coiled-coil domain containing 88B
ENSMFAG00000041756	KIAA2026	0.222966	0.0192395			protein_coding	KIAA2026
ENSMFAG00000043969	CC2D1A	0.222874	0.0161354			protein_coding	coiled-coil and C2 domain containing 1A
ENSMFAG00000045340	SLC38A7	0.222699	0.0317432			protein_coding	solute carrier family 38 member 7
ENSMFAG00000002792	TULP4	0.222582	0.0293964			protein_coding	TUB like protein 4
ENSMFAG00000035380	C1orf52	0.222486	0.0200344			protein_coding	chromosome 1 open reading frame 52
ENSMFAG00000031567	SEC16A	0.222375	0.0244207			protein_coding	SEC16 homolog A, endoplasmic reticulum export factor
ENSMFAG00000031794	FUS	0.22207	0.048123			protein_coding	FUS RNA binding protein
ENSMFAG00000031186	MTA1	0.221993	0.00842409			protein_coding	metastasis associated 1
ENSMFAG00000008200	RUFY2	0.221762	0.0212281			protein_coding	RUN and FYVE domain containing 2
ENSMFAG00000000635	HAUS6	0.221011	0.0213402			protein_coding	HAUS augmin like complex subunit 6
ENSMFAG00000015862	NCOA6	0.220897	0.0320961			protein_coding	nuclear receptor coactivator 6
ENSMFAG00000035422	METTL1	0.220779	0.038136			protein_coding	methyltransferase like 1
ENSMFAG00000000138	RPTOR	0.220447	0.0142018			protein_coding	regulatory associated protein of MTOR complex 1
ENSMFAG00000035788	ARID1B	0.220316	0.0150892			protein_coding	AT-rich interaction domain 1B
ENSMFAG00000035960	GON4L	0.22018	0.0209021			protein_coding	gon-4 like
ENSMFAG00000002496	PRSS53	0.220034	0.0252644			protein_coding	serine protease 53
ENSMFAG00000032035	THRA	0.22002	0.044059			protein_coding	thyroid hormone receptor alpha
ENSMFAG00000001402	CUX1	0.219896	0.0337716	Proinflammatory		protein_coding	cut like homeobox 1
ENSMFAG00000037748	UPF1	0.219792	0.0124544			protein_coding	UPF1 RNA helicase and ATPase
ENSMFAG00000028267	HNRNPH1	0.219605	0.00869861			protein_coding	heterogeneous nuclear ribonucleoprotein H1
ENSMFAG00000016641	RF00602	0.219421	0.0342318			scaRNA	small Cajal body-specific RNA 21
ENSMFAG00000001075	ZNF8	0.219411	0.0329146			protein_coding	zinc finger protein 8
ENSMFAG00000030988	RNGTT	0.219378	0.040069			protein_coding	RNA guanylyltransferase and 5'-phosphatase
ENSMFAG00000040948	FNIP1	0.21926	0.0187053			protein_coding	folliculin interacting protein 1
ENSMFAG00000037628	BANP	0.219239	0.0197629			protein_coding	BTG3 associated nuclear protein
ENSMFAG00000032608	EHD1	0.219193	0.0305433			protein_coding	EH domain containing 1
ENSMFAG00000039483	MAP1S	0.219129	0.0213402			protein_coding	microtubule associated protein 1S
ENSMFAG00000001833	CEP192	0.21899	0.0467344			protein_coding	centrosomal protein 192
ENSMFAG00000031015		0.218871	0.0300309			protein_coding	coronin 7
ENSMFAG00000044177	HDAC7	0.218636	0.0327643	Proinflammatory		protein_coding	histone deacetylase 7
ENSMFAG00000003486	ZNF512B	0.218316	0.0453692			protein_coding	zinc finger protein 512B
ENSMFAG00000036546	DENND2D	0.218032	0.0261272			protein_coding	DENN domain containing 2D
ENSMFAG00000033708	DGCR8	0.218	0.0115053			protein_coding	DGCR8 microprocessor complex subunit
ENSMFAG00000037013	CPSF1	0.217944	0.0156841			protein_coding	cleavage and polyadenylation specific factor 1
ENSMFAG00000043094		0.217807	0.0296069			protein_coding	RAB guanine nucleotide exchange factor 1
ENSMFAG00000017880	KDM5B	0.217594	0.04327			protein_coding	lysine demethylase 5B
ENSMFAG00000032541	GLA	0.217513	0.0261863			protein_coding	galactosidase alpha
ENSMFAG00000037567	P4HTM	0.217476	0.042284			protein_coding	prolyl 4-hydroxylase, transmembrane
ENSMFAG00000043688	PHF21A	0.216954	0.0452288	Proinflammatory		protein_coding	PHD finger protein 21A
ENSMFAG00000041836	RAD54L2	0.216851	0.0263756			protein_coding	RAD54 like 2
ENSMFAG00000042624	TRA2B	0.216804	0.0252644			protein_coding	transformer 2 beta homolog
ENSMFAG00000044308	ZNF326	0.216727	0.0246138			protein_coding	zinc finger protein 326
ENSMFAG00000034687	FRYL	0.216631	0.036384			protein_coding	FRY like transcription coactivator
ENSMFAG00000033279	PCNX1	0.21636	0.0243115			protein_coding	pecanex 1
ENSMFAG00000037352	SFSWAP	0.216351	0.0188694			protein_coding	splicing factor SWAP
ENSMFAG00000033711	NFRKB	0.216119	0.0179239			protein_coding	nuclear factor related to kappaB binding protein
ENSMFAG00000002600	DCAKD	0.215897	0.0455742			protein_coding	dephospho-CoA kinase domain containing
ENSMFAG00000041506	YDJC	0.215791	0.0446318			protein_coding	YdjC chitooligosaccharide deacetylase homolog
ENSMFAG00000035465	CMIP	0.215613	0.0149714	Proinflammatory		protein_coding	c-Maf inducing protein
ENSMFAG00000000519	PRRC2C	0.215045	0.0369141	Proinflammatory		protein_coding	proline rich coiled-coil 2C
ENSMFAG00000031354	ATG2B	0.214791	0.0134878			protein_coding	autophagy related 2B
ENSMFAG00000044663	RMND5B	0.214329	0.0210125			protein_coding	required for meiotic nuclear division 5 homolog B
ENSMFAG00000031124	SSBP3	0.213886	0.0118249			protein_coding	single stranded DNA binding protein 3
ENSMFAG00000045399	NXF1	0.213834	0.0447744			protein_coding	nuclear RNA export factor 1
ENSMFAG00000035878	ESRRA	0.213814	0.0243348			protein_coding	estrogen related receptor alpha
ENSMFAG00000043306	GAK	0.213769	0.034669			protein_coding	cyclin G associated kinase
ENSMFAG00000035755		0.213734	0.0369117			protein_coding	G protein-coupled receptor 132
ENSMFAG00000029268	NISCH	0.213547	0.0261272	Proinflammatory		protein_coding	nischarin
ENSMFAG00000044519		0.213246	0.0405623			protein_coding	leucine-rich repeat-containing protein 37A2
ENSMFAG00000000743	IPO4	0.2132	0.0261562			protein_coding	importin 4
ENSMFAG00000030733	HSF1	0.213176	0.00731363			protein_coding	heat shock transcription factor 1
ENSMFAG00000040742	PELI3	0.212947	0.0432633			protein_coding	pellino E3 ubiquitin protein ligase family member 3
ENSMFAG00000041627	UBOX5	0.21282	0.0329485			protein_coding	U-box domain containing 5
ENSMFAG00000038667	RBSN	0.212526	0.0118249			protein_coding	rabenosyn, RAB effector
ENSMFAG00000002885	PAXBP1	0.212399	0.0234599			protein_coding	PAX3 and PAX7 binding protein 1
ENSMFAG00000043534	REV1	0.21223	0.0239657			protein_coding	REV1 DNA directed polymerase
ENSMFAG00000003807	TP53BP2	0.212032	0.0418083			protein_coding	tumor protein p53 binding protein 2
ENSMFAG00000035479	TMEM127	0.211763	0.031772	Proinflammatory		protein_coding	transmembrane protein 127
ENSMFAG00000043581	USP34	0.211588	0.0272228			protein_coding	ubiquitin specific peptidase 34
ENSMFAG00000045524	SRSF2	0.211583	0.0458682			protein_coding	serine and arginine rich splicing factor 2
ENSMFAG00000030997		0.211544	0.0458849			protein_coding	caspase recruitment domain-containing protein 8
ENSMFAG00000000144	HUS1	0.211533	0.0458055			protein_coding	HUS1 checkpoint clamp component
ENSMFAG00000002498	CEP128	0.211513	0.0456075			protein_coding	centrosomal protein 128
ENSMFAG00000024011	FKRP	0.211393	0.0452414			protein_coding	fukutin related protein
ENSMFAG00000032079	HMBS	0.211209	0.0249978			protein_coding	hydroxymethylbilane synthase
ENSMFAG00000040073	CNOT3	0.211039	0.0367324			protein_coding	CCR4-NOT transcription complex subunit 3
ENSMFAG00000030258	RBM33	0.211028	0.0342577			protein_coding	RNA binding motif protein 33
ENSMFAG00000000389	RREB1	0.211002	0.0301731	Proinflammatory		protein_coding	ras responsive element binding protein 1
ENSMFAG00000002070	TMEM131L	0.210979	0.0436927			protein_coding	transmembrane 131 like
ENSMFAG00000003758	USP37	0.210714	0.0118249			protein_coding	ubiquitin specific peptidase 37
ENSMFAG00000037689		0.210538	0.0217225			protein_coding	myosin phosphatase Rho interacting protein
ENSMFAG00000002945	TP53BP1	0.210135	0.0117315			protein_coding	tumor protein p53 binding protein 1
ENSMFAG00000044643	ZNF236	0.209887	0.0301446			protein_coding	zinc finger protein 236
ENSMFAG00000043522	FOSL2	0.209764	0.0302699	Proinflammatory	Inflammatory	protein_coding	FOS like 2, AP-1 transcription factor subunit
ENSMFAG00000044565	FOXO1	0.209694	0.02338	Regulatory		protein_coding	forkhead box O1
ENSMFAG00000000133	ENTPD6	0.2096	0.0277759			protein_coding	ectonucleoside triphosphate diphosphohydrolase 6
ENSMFAG00000034233	DDX39B	0.209549	0.0158132			protein_coding	DExD-box helicase 39B
ENSMFAG00000001781	SMAD3	0.209277	0.0448289			protein_coding	SMAD family member 3
ENSMFAG00000035362	PEX10	0.209004	0.0431145			protein_coding	peroxisomal biogenesis factor 10
ENSMFAG00000035631	IPO11	0.208855	0.0293829			protein_coding	importin 11
ENSMFAG00000030296	CLIP2	0.20875	0.0348925			protein_coding	CAP-Gly domain containing linker protein 2
ENSMFAG00000032343	HIVEP1	0.208405	0.0367324			protein_coding	human immunodeficiency virus type I enhancer binding protein 1
ENSMFAG00000043979	KIF9	0.208401	0.0263873			protein_coding	kinesin family member 9
ENSMFAG00000044609	RXRA	0.208318	0.0457012			protein_coding	retinoid X receptor alpha
ENSMFAG00000044421	MAML3	0.208276	0.0192395	Proinflammatory		protein_coding	mastermind like transcriptional coactivator 3
ENSMFAG00000033178	MECP2	0.208198	0.0151461			protein_coding	methyl-CpG binding protein 2
ENSMFAG00000039236	TAF1D	0.207967	0.0302986			protein_coding	TATA-box binding protein associated factor, RNA polymerase I subunit D
ENSMFAG00000033013	SAMD8	0.207737	0.0414509			protein_coding	sterile alpha motif domain containing 8
ENSMFAG00000000285	KLHL22	0.207507	0.0212281			protein_coding	kelch like family member 22
ENSMFAG00000001520	TTBK2	0.207459	0.015832			protein_coding	tau tubulin kinase 2
ENSMFAG00000008985	BIRC6	0.207361	0.0246138			protein_coding	baculoviral IAP repeat containing 6
ENSMFAG00000033267	CHERP	0.207347	0.0324605			protein_coding	calcium homeostasis endoplasmic reticulum protein
ENSMFAG00000030590	ATXN2L	0.207271	0.0143759	Proinflammatory		protein_coding	ataxin 2 like
ENSMFAG00000030748	ZDHHC18	0.207178	0.0464327			protein_coding	zinc finger DHHC-type containing 18
ENSMFAG00000033916	PPP1R12C	0.206937	0.0169548			protein_coding	protein phosphatase 1 regulatory subunit 12C
ENSMFAG00000029840	BAZ2A	0.2066	0.048051			protein_coding	bromodomain adjacent to zinc finger domain 2A
ENSMFAG00000018168	PRKRIP1	0.206447	0.0214829			protein_coding	PRKR interacting protein 1
ENSMFAG00000036921	PPARD	0.206423	0.0265232	Proinflammatory		protein_coding	peroxisome proliferator activated receptor delta
ENSMFAG00000034140	ELMSAN1	0.206316	0.0333896			protein_coding	ELM2 and Myb/SANT domain containing 1
ENSMFAG00000038133	TTC13	0.206315	0.0320865			protein_coding	tetratricopeptide repeat domain 13
ENSMFAG00000041553		0.206303	0.0378793			protein_coding
ENSMFAG00000002471	CPTP	0.206293	0.00893433			protein_coding	ceramide-1-phosphate transfer protein
ENSMFAG00000036991	NFKBIB	0.206246	0.0340437			protein_coding	NFKB inhibitor beta
ENSMFAG00000001315	SPG7	0.2062	0.0221454			protein_coding	SPG7 matrix AAA peptidase subunit, paraplegin
ENSMFAG00000035525	ING5	0.205971	0.0344992			protein_coding	inhibitor of growth family member 5
ENSMFAG00000001433	LLGL2	0.205858	0.0470756			protein_coding	LLGL scribble cell polarity complex component 2
ENSMFAG00000003292	ABCA7	0.205618	0.0341922			protein_coding	ATP binding cassette subfamily A member 7
ENSMFAG00000045292	KDM8	0.205376	0.0401814			protein_coding	lysine demethylase 8
ENSMFAG00000003576		0.205352	0.0320961			protein_coding	neutral sphingomyelinase activation associated factor
ENSMFAG00000032767	LRCH1	0.205104	0.019306			protein_coding	leucine rich repeats and calponin homology domain containing 1
ENSMFAG00000035771	RAB3GAP2	0.204815	0.034512			protein_coding	RAB3 GTPase activating non-catalytic protein subunit 2
ENSMFAG00000000720	PRRC2A	0.204696	0.0133677	Proinflammatory		protein_coding	proline rich coiled-coil 2A
ENSMFAG00000042627	ELF2	0.204503	0.0200386			protein_coding	E74 like ETS transcription factor 2
ENSMFAG00000041343	TBC1D22A	0.204493	0.0330831			protein_coding	TBC1 domain family member 22A
ENSMFAG00000001003	VPS13C	0.204477	0.0276328	Proinflammatory		protein_coding	vacuolar protein sorting 13 homolog C
ENSMFAG00000036532	PHF8	0.204246	0.0252614			protein_coding	PHD finger protein 8
ENSMFAG00000032188	OGA	0.20382	0.0236704			protein_coding	O-GlcNAcase
ENSMFAG00000045357	SMG5	0.20358	0.0130974			protein_coding	SMG5 nonsense mediated mRNA decay factor
ENSMFAG00000031817	TLE4	0.203558	0.0144004			protein_coding	TLE family member 4, transcriptional corepressor
ENSMFAG00000044241	MED29	0.203252	0.029188			protein_coding	mediator complex subunit 29
ENSMFAG00000037245	MED15	0.203158	0.0155307			protein_coding	mediator complex subunit 15
ENSMFAG00000035305	NR2C1	0.20282	0.0189131			protein_coding	nuclear receptor subfamily 2 group C member 1
ENSMFAG00000045883	PRKD2	0.202695	0.0134088			protein_coding	protein kinase D2
ENSMFAG00000007299	TSC1	0.202494	0.019808			protein_coding	TSC complex subunit 1
ENSMFAG00000004722	PDE4A	0.201966	0.0417353			protein_coding	phosphodiesterase 4A
ENSMFAG00000038333	TMEM259	0.201839	0.018977			protein_coding	transmembrane protein 259
ENSMFAG00000002099	AMDHD2	0.201601	0.0239173			protein_coding	amidohydrolase domain containing 2
ENSMFAG00000043770	RALGAPA1	0.201537	0.0124521			protein_coding	Ral GTPase activating protein catalytic alpha subunit 1
ENSMFAG00000044583	INTS11	0.20153	0.0115053			protein_coding	integrator complex subunit 11
ENSMFAG00000001609	ETV3	0.201323	0.0161354			protein_coding	ETS variant 3
ENSMFAG00000035843	STRN4	0.201222	0.0234184			protein_coding	striatin 4
ENSMFAG00000035618	CCDC88B	0.201195	0.029792	Proinflammatory		protein_coding	coiled-coil domain containing 88B
ENSMFAG00000043484	FARS2	0.200575	0.0331343			protein_coding	phenylalanyl-tRNA synthetase 2, mitochondrial
ENSMFAG00000038372	TSSC4	0.200337	0.0121197			protein_coding	tumor suppressing subtransferable candidate 4
ENSMFAG00000037655	FLCN	0.200334	0.0189788			protein_coding	folliculin
ENSMFAG00000046150	CRTC2	0.200294	0.0143759			protein_coding	CREB regulated transcription coactivator 2
ENSMFAG00000037354	SYVN1	0.200279	0.0132529			protein_coding	synoviolin 1
ENSMFAG00000037798		0.200072	0.0207573			protein_coding	Rho/Rac guanine nucleotide exchange factor 18
ENSMFAG00000031129	GOLGA1	0.199216	0.0362022			protein_coding	golgin A1
ENSMFAG00000031462	VAMP2	0.199133	0.0234184	Proinflammatory		protein_coding	vesicle associated membrane protein 2
ENSMFAG00000033483	WDR7	0.199031	0.0296001			protein_coding	WD repeat domain 7
ENSMFAG00000034297	LRCH4	0.198922	0.0143562			protein_coding	leucine rich repeats and calponin homology domain containing 4
ENSMFAG00000001166	CNTRL	0.198915	0.0178227			protein_coding	centriolin
ENSMFAG00000046360	KRI1	0.198819	0.042272			protein_coding	KRI1 homolog
ENSMFAG00000045334	CABIN1	0.198578	0.0246138			protein_coding	calcineurin binding protein 1
ENSMFAG00000045202	ATF7IP	0.198554	0.0107677			protein_coding	activating transcription factor 7 interacting protein
ENSMFAG00000032623	C14orf28	0.198272	0.0357632			protein_coding	chromosome 14 open reading frame 28
ENSMFAG00000041378	UBR2	0.198222	0.0276854			protein_coding	ubiquitin protein ligase E3 component n-recognin 2
ENSMFAG00000033606	MDM4	0.198179	0.024651	Proinflammatory		protein_coding	MDM4 regulator of p53
ENSMFAG00000033285	TRAF2	0.198035	0.0393106			protein_coding	TNF receptor associated factor 2
ENSMFAG00000001144	NOTCH2	0.197915	0.04918			protein_coding	notch receptor 2
ENSMFAG00000045831	ATG14	0.197891	0.0111194			protein_coding	autophagy related 14
ENSMFAG00000036385	R3HDM2	0.197751	0.0261111			protein_coding	R3H domain containing 2
ENSMFAG00000034374		0.197353	0.0190354			protein_coding	mitogen-activated protein kinase kinase kinase kinase 1
ENSMFAG00000034462	YPEL5	0.19699	0.0357387			protein_coding	yippee like 5
ENSMFAG00000000374	ATXN2	0.196783	0.0463246			protein_coding	ataxin 2
ENSMFAG00000039603	CLPB	0.196739	0.0201084			protein_coding	ClpB homolog, mitochondrial AAA ATPase chaperonin
ENSMFAG00000032146	SMARCA4	0.196665	0.0160596			protein_coding	SWI/SNF related, matrix associated, actin dependent regulator of chromatin, subfamily a, member 4
ENSMFAG00000041406	ZSWIM8	0.196641	0.019251			protein_coding	zinc finger SWIM-type containing 8
ENSMFAG00000038061	RAF1	0.196361	0.0253894	Proinflammatory		protein_coding	Raf-1 proto-oncogene, serine/threonine kinase
ENSMFAG00000002904	SSH1	0.196252	0.0319968			protein_coding	slingshot protein phosphatase 1
ENSMFAG00000003245	TAF1C	0.196123	0.0305514			protein_coding	TATA-box binding protein associated factor, RNA polymerase I subunit C
ENSMFAG00000002409	BIVM-ERCC5	0.195621	0.0161197			protein_coding	BIVM-ERCC5 readthrough
ENSMFAG00000045390	KMT2E	0.195209	0.0486513			protein_coding	lysine methyltransferase 2E
ENSMFAG00000000434	SAP30BP	0.194451	0.0237245			protein_coding	SAP30 binding protein
ENSMFAG00000042540	PEAK1	0.194379	0.0453061			protein_coding	pseudopodium enriched atypical kinase 1
ENSMFAG00000031331	RNF24	0.194372	0.0428945	Proinflammatory		protein_coding	ring finger protein 24
ENSMFAG00000018883	SYNJ1	0.194305	0.0249482			protein_coding	synaptojanin 1
ENSMFAG00000045992	WDR4	0.194202	0.0476627			protein_coding	WD repeat domain 4
ENSMFAG00000037531	TNPO2	0.19417	0.0260586			protein_coding	transportin 2
ENSMFAG00000031020	SCAF1	0.193903	0.0118824			protein_coding	SR-related CTD associated factor 1
ENSMFAG00000046172	CSPP1	0.19322	0.025652			protein_coding	centrosome and spindle pole associated protein 1
ENSMFAG00000023538	LRRK1	0.192799	0.0192395			protein_coding	leucine rich repeat kinase 1
ENSMFAG00000041344	INVS	0.192648	0.0423705			protein_coding	inversin
ENSMFAG00000041114	CIAO3	0.192197	0.0124115			protein_coding	cytosolic iron-sulfur assembly component 3
ENSMFAG00000032305	INPP4A	0.192151	0.017469			protein_coding	inositol polyphosphate-4-phosphatase type I A
ENSMFAG00000031775	MLLT10	0.191399	0.0273571			protein_coding	MLLT10 histone lysine methyltransferase DOT1L cofactor
ENSMFAG00000035979	MAP7D1	0.19134	0.0134088	Proinflammatory		protein_coding	MAP7 domain containing 1
ENSMFAG00000002292	KLHL18	0.191108	0.0258957			protein_coding	kelch like family member 18
ENSMFAG00000000368	TMC8	0.191077	0.0439073			protein_coding	transmembrane channel like 8
ENSMFAG00000003201	KHDC4	0.190866	0.00972613			protein_coding	KH domain containing 4, pre-mRNA splicing factor
ENSMFAG00000018901	COG1	0.190767	0.0140139			protein_coding	component of oligomeric golgi complex 1
ENSMFAG00000035888	CNOT1	0.190753	0.0179871			protein_coding	CCR4-NOT transcription complex subunit 1
ENSMFAG00000014540	RF00563	0.190591	0.0482407			snoRNA	small nucleolar RNA, H/ACA box 53
ENSMFAG00000030541	KIAA1109	0.190521	0.0286008			protein_coding	KIAA1109
ENSMFAG00000033602	ATXN7L1	0.190514	0.0253305			protein_coding	ataxin 7 like 1
ENSMFAG00000030070	DCAF15	0.190259	0.0107677			protein_coding	DDB1 and CUL4 associated factor 15
ENSMFAG00000046284	PTP4A1	0.190128	0.043439			protein_coding	protein tyrosine phosphatase 4A1
ENSMFAG00000000499	GNL3L	0.18991	0.0318388			protein_coding	G protein nucleolar 3 like
ENSMFAG00000031487	ZBTB2	0.189808	0.0428522			protein_coding	zinc finger and BTB domain containing 2
ENSMFAG00000041181	GSE1	0.189705	0.0249978			protein_coding	Gse1 coiled-coil protein
ENSMFAG00000039710	MKLN1	0.189691	0.028146			protein_coding	muskelin 1
ENSMFAG00000037937	INPPL1	0.189394	0.0421753	Proinflammatory		protein_coding	inositol polyphosphate phosphatase like 1
ENSMFAG00000037890	ATL2	0.189321	0.0492305			protein_coding	atlastin GTPase 2
ENSMFAG00000046345	SUCO	0.189259	0.0336827			protein_coding	SUN domain containing ossification factor
ENSMFAG00000037723	AKT1S1	0.189188	0.00955689			protein_coding	AKT1 substrate 1
ENSMFAG00000001666	RLIM	0.188995	0.0420445			protein_coding	ring finger protein, LIM domain interacting
ENSMFAG00000044175	ZSWIM6	0.188958	0.0293963	Proinflammatory		protein_coding	zinc finger SWIM-type containing 6
ENSMFAG00000045219	CRY2	0.188908	0.0186519			protein_coding	cryptochrome circadian regulator 2
ENSMFAG00000037270	ZFYVE1	0.188537	0.019808			protein_coding	zinc finger FYVE-type containing 1
ENSMFAG00000045651	RAB24	0.188342	0.0107677			protein_coding	RAB24, member RAS oncogene family
ENSMFAG00000040944	MAP3K5	0.188168	0.0442991			protein_coding	mitogen-activated protein kinase kinase kinase 5
ENSMFAG00000033454	RIC8A	0.188063	0.0116339			protein_coding	RIC8 guanine nucleotide exchange factor A
ENSMFAG00000001961	CLEC16A	0.187567	0.0312076			protein_coding	C-type lectin domain containing 16A
ENSMFAG00000003468	OSBPL1A	0.187466	0.0369117			protein_coding	oxysterol binding protein like 1A
ENSMFAG00000033329	NCAPH2	0.18744	0.0173428			protein_coding	non-SMC condensin II complex subunit H2
ENSMFAG00000003779		0.187419	0.0327658			protein_coding	SLIT-ROBO Rho GTPase activating protein 2
ENSMFAG00000042858	FBXL17	0.187283	0.0349462			protein_coding	F-box and leucine rich repeat protein 17
ENSMFAG00000046149	KDM3A	0.187107	0.0121998			protein_coding	lysine demethylase 3A
ENSMFAG00000031813	NCKAP5L	0.187085	0.0322275			protein_coding	NCK associated protein 5 like
ENSMFAG00000032444	HEATR5B	0.186555	0.0485478			protein_coding	HEAT repeat containing 5B
ENSMFAG00000043376	HIF1AN	0.18645	0.0272452			protein_coding	hypoxia inducible factor 1 subunit alpha inhibitor
ENSMFAG00000031888	SPSB3	0.186367	0.0204983			protein_coding	splA/ryanodine receptor domain and SOCS box containing 3
ENSMFAG00000043714	ZNF451	0.186307	0.0216019			protein_coding	zinc finger protein 451
ENSMFAG00000031780	LUC7L3	0.185358	0.0331005	Proinflammatory		protein_coding	LUC7 like 3 pre-mRNA splicing factor
ENSMFAG00000033383	ST20-MTHFS	0.185324	0.0275898			protein_coding	ST20-MTHFS readthrough
ENSMFAG00000035872	LPIN1	0.185256	0.0238906			protein_coding	lipin 1
ENSMFAG00000043836	TEDC1	0.184809	0.0143764			protein_coding	tubulin epsilon and delta complex 1
ENSMFAG00000035930	ZXDC	0.184642	0.0203063			protein_coding	ZXD family zinc finger C
ENSMFAG00000030369	EDC4	0.184521	0.0252012			protein_coding	enhancer of mRNA decapping 4
ENSMFAG00000043994	ZNF142	0.184451	0.0435853	Proinflammatory		protein_coding	zinc finger protein 142
ENSMFAG00000001299	RLF	0.184415	0.0268832			protein_coding	rearranged L-myc fusion
ENSMFAG00000032768	RIC1	0.184319	0.0151189			protein_coding	RIC1 homolog, RAB6A GEF complex partner 1
ENSMFAG00000035786	C3orf62	0.183699	0.0323652			protein_coding	chromosome 3 open reading frame 62
ENSMFAG00000043351	EHBP1	0.18366	0.018974			protein_coding	EH domain binding protein 1
ENSMFAG00000038799	SEC24B	0.183402	0.0205376			protein_coding	SEC24 homolog B, COPII coat complex component
ENSMFAG00000032728	PSPC1	0.183007	0.0200656			protein_coding	paraspeckle component 1
ENSMFAG00000001271	PACS1	0.182911	0.047127			protein_coding	phosphofurin acidic cluster sorting protein 1
ENSMFAG00000001141	WASF2	0.18236	0.0434669			protein_coding	WASP family member 2
ENSMFAG00000023644	AKIRIN2	0.182243	0.0355359			protein_coding	akirin 2
ENSMFAG00000001500	CEP83	0.182237	0.0464524			protein_coding	centrosomal protein 83
ENSMFAG00000035860	FOXJ2	0.182104	0.0231535			protein_coding	forkhead box J2
ENSMFAG00000042791	CCNT2	0.182088	0.0234101			protein_coding	cyclin T2
ENSMFAG00000003849	SNX19	0.181951	0.0447912			protein_coding	sorting nexin 19
ENSMFAG00000039218	ANAPC2	0.181715	0.0133559			protein_coding	anaphase promoting complex subunit 2
ENSMFAG00000031756	MAP2K7	0.181394	0.007539			protein_coding	mitogen-activated protein kinase kinase 7
ENSMFAG00000045930	UBR3	0.181277	0.0247834			protein_coding	ubiquitin protein ligase E3 component n-recognin 3
ENSMFAG00000039891	NSMF	0.181243	0.0469482			protein_coding	NMDA receptor synaptonuclear signaling and neuronal migration factor
ENSMFAG00000040603		0.181011	0.0261857			protein_coding
ENSMFAG00000036518	ZNF76	0.179697	0.0220619			protein_coding	zinc finger protein 76
ENSMFAG00000037361	MON2	0.179417	0.0331343			protein_coding	MON2 homolog, regulator of endosome-to-Golgi trafficking
ENSMFAG00000037398	ESCO1	0.179413	0.0287822			protein_coding	establishment of sister chromatid cohesion N-acetyltransferase 1
ENSMFAG00000025726	SRRM1	0.179169	0.0121197			protein_coding	serine and arginine repetitive matrix 1
ENSMFAG00000041704		0.178898	0.0234387			protein_coding	trafficking protein particle complex 10
ENSMFAG00000001601	SETD2	0.178688	0.0238301	Proinflammatory		protein_coding	SET domain containing 2, histone lysine methyltransferase
ENSMFAG00000043922	ARHGEF5	0.178514	0.0400422			protein_coding	Rho guanine nucleotide exchange factor 5
ENSMFAG00000041287	DNAJB2	0.17796	0.0321964			protein_coding	DnaJ heat shock protein family (Hsp40) member B2
ENSMFAG00000002814	KDM4B	0.177833	0.0242157	Proinflammatory		protein_coding	lysine demethylase 4B
ENSMFAG00000038577	MTMR14	0.177692	0.0117029			protein_coding	myotubularin related protein 14
ENSMFAG00000043179	POLK	0.177597	0.0482407			protein_coding	DNA polymerase kappa
ENSMFAG00000036588	TOP3B	0.177502	0.0221499			protein_coding	DNA topoisomerase III beta
ENSMFAG00000036063	SETD9	0.177439	0.0293388			protein_coding	SET domain containing 9
ENSMFAG00000044220		0.177406	0.0161354			protein_coding	cyclin-dependent kinase 11B
ENSMFAG00000042476	POLG	0.177114	0.0155307			protein_coding	DNA polymerase gamma, catalytic subunit
ENSMFAG00000000724	CDC14A	0.17707	0.0445966			protein_coding	cell division cycle 14A
ENSMFAG00000037078	NCOA3	0.177008	0.0163646			protein_coding	nuclear receptor coactivator 3
ENSMFAG00000026599	LRRC8B	0.17679	0.0406339			protein_coding	leucine rich repeat containing 8 VRAC subunit B
ENSMFAG00000043896	MAP3K12	0.176783	0.0435562			protein_coding	mitogen-activated protein kinase kinase kinase 12
ENSMFAG00000032530	RICTOR	0.176576	0.021999			protein_coding	RPTOR independent companion of MTOR complex 2
ENSMFAG00000031721	KDM2A	0.176228	0.0116421			protein_coding	lysine demethylase 2A
ENSMFAG00000030770	EHMT1	0.176154	0.0319708			protein_coding	euchromatic histone lysine methyltransferase 1
ENSMFAG00000037249	BAP1	0.175862	0.02029			protein_coding	BRCA1 associated protein 1
ENSMFAG00000041376	TOR3A	0.175859	0.0266202			protein_coding	torsin family 3 member A
ENSMFAG00000037079	MKNK2	0.174939	0.0133559			protein_coding	MAPK interacting serine/threonine kinase 2
ENSMFAG00000037172	ICE1	0.174902	0.0297951			protein_coding	interactor of little elongation complex ELL subunit 1
ENSMFAG00000039619	MADD	0.174737	0.0263787			protein_coding	MAP kinase activating death domain
ENSMFAG00000029929	RBM15	0.174639	0.0174256			protein_coding	RNA binding motif protein 15
ENSMFAG00000042241	FAAP100	0.174596	0.0171496			protein_coding	FA core complex associated protein 100
ENSMFAG00000001935	SNX30	0.174473	0.031639			protein_coding	sorting nexin family member 30
ENSMFAG00000003584	CAMKMT	0.17435	0.0482407			protein_coding	calmodulin-lysine N-methyltransferase
ENSMFAG00000002399	PPP1R18	0.174314	0.0486564			protein_coding	protein phosphatase 1 regulatory subunit 18
ENSMFAG00000038693	ARID2	0.17429	0.042272			protein_coding	AT-rich interaction domain 2
ENSMFAG00000044015	APBA3	0.173607	0.0312815			protein_coding	amyloid beta precursor protein binding family A member 3
ENSMFAG00000017416	STK35	0.17347	0.0267256			protein_coding	serine/threonine kinase 35
ENSMFAG00000045331	ATP13A1	0.173029	0.0443918			protein_coding	ATPase 13A1
ENSMFAG00000031600	TACC1	0.172886	0.0236141			protein_coding	transforming acidic coiled-coil containing protein 1
ENSMFAG00000031802	SURF2	0.172863	0.0320636			protein_coding	surfeit 2
ENSMFAG00000040715	BRD9	0.172715	0.015911			protein_coding	bromodomain containing 9
ENSMFAG00000044550	RECQL5	0.172642	0.0477714			protein_coding	RecQ like helicase 5
ENSMFAG00000044808	MARK4	0.172566	0.0278359			protein_coding	microtubule affinity regulating kinase 4
ENSMFAG00000044074	HDAC6	0.17234	0.0326915			protein_coding	histone deacetylase 6
ENSMFAG00000012420	RF00494	0.172327	0.0456886			snoRNA
ENSMFAG00000031971		0.172247	0.0168795			protein_coding	sperm antigen with calponin homology and coiled-coil domains 1 like
ENSMFAG00000037718	PRR14	0.172198	0.0203312			protein_coding	proline rich 14
ENSMFAG00000035917	IPO9	0.172141	0.0180063			protein_coding	importin 9
ENSMFAG00000040599	SH3BP2	0.171827	0.0227059			protein_coding	SH3 domain binding protein 2
ENSMFAG00000046119	PIAS4	0.171317	0.0306961			protein_coding	protein inhibitor of activated STAT 4
ENSMFAG00000043326	USP4	0.17076	0.0375233			protein_coding	ubiquitin specific peptidase 4
ENSMFAG00000027750	METTL22	0.170754	0.0405291			protein_coding	methyltransferase like 22
ENSMFAG00000043744	TET2	0.170396	0.0320961	Proinflammatory		protein_coding	tet methylcytosine dioxygenase 2
ENSMFAG00000031978	DENND1C	0.170268	0.0275688			protein_coding	DENN domain containing 1C
[truncated: 2,902 more rows]

## Sheet: Table_S2A
Biological Processes Enriched in Western Genes Compared to Other Measured Genes
GO ID	GO Term	Annotated	Significant	Expected	Log2-Odds Ratio	p-value
GO:0080182	histone H3-K4 trimethylation	14	10	2.37	3.62827	< 0.001
GO:0035909	aorta morphogenesis	10	7	1.69	3.52592	< 0.001
GO:0018027	peptidyl-lysine dimethylation	13	9	2.2	3.47526	< 0.001
GO:0010656	negative regulation of muscle cell apoptotic process	11	7	1.86	3.11068	0.00068
GO:0001662	behavioral fear response	11	7	1.86	3.11068	0.00068
GO:1903055	positive regulation of extracellular matrix organization	11	7	1.86	3.11068	0.00068
GO:0070076	histone lysine demethylation	18	11	3.04	2.95881	< 0.001
GO:0002067	glandular epithelial cell differentiation	15	9	2.54	2.88989	0.00349
GO:1901096	regulation of autophagosome maturation	10	6	1.69	2.88728	0.00261
GO:0035278	miRNA mediated inhibition of translation	12	7	2.03	2.78855	0.0014
GO:0048488	synaptic vesicle endocytosis	12	7	2.03	2.78855	0.0014
GO:0050795	regulation of behavior	14	8	2.37	2.71896	0.00075
GO:1900153	positive regulation of nuclear-transcribed mRNA catabolic process, deadenylation-dependent decay	11	6	1.86	2.56515	0.00493
GO:0045589	regulation of regulatory T cell differentiation	11	6	1.86	2.56515	0.00493
GO:0060211	regulation of nuclear-transcribed mRNA poly(A) tail shortening	11	6	1.86	2.56515	0.00493
GO:0032369	negative regulation of lipid transport	11	6	1.86	2.56515	0.00493
GO:0030857	negative regulation of epithelial cell differentiation	13	7	2.2	2.52531	0.00259
GO:0043153	entrainment of circadian clock by photoperiod	15	8	2.54	2.49636	0.00137
GO:0033962	cytoplasmic mRNA processing body assembly	15	8	2.54	2.49636	0.00137
GO:0014910	regulation of smooth muscle cell migration	15	8	2.54	2.49636	0.00137
GO:0000423	mitophagy	19	10	3.21	2.45733	0.00906
GO:0032007	negative regulation of TOR signaling	29	15	4.9	2.40888	< 0.001
GO:1905330	regulation of morphogenesis of an epithelium	28	14	4.73	2.30834	< 0.001
GO:0036003	positive regulation of transcription from RNA polymerase II promoter in response to stress	16	8	2.71	2.30351	0.00234
GO:2001222	regulation of neuron migration	16	8	2.71	2.30351	0.00234
GO:0035850	epithelial cell differentiation involved in kidney development	14	7	2.37	2.30271	0.00443
GO:0060972	left/right pattern formation	12	6	2.03	2.30191	0.00847
GO:2000737	negative regulation of stem cell differentiation	12	6	2.03	2.30191	0.00847
GO:0031018	endocrine pancreas development	12	6	2.03	2.30191	0.00847
GO:0035567	non-canonical Wnt signaling pathway	12	6	2.03	2.30191	0.00847
GO:0051497	negative regulation of stress fiber assembly	12	6	2.03	2.30191	0.00847
GO:0032784	regulation of DNA-templated transcription, elongation	25	12	4.23	2.19104	0.00477
GO:0042472	inner ear morphogenesis	19	9	3.21	2.15211	0.00201
GO:0098780	response to mitochondrial depolarisation	17	8	2.87	2.13338	0.0035
GO:0072583	clathrin-dependent endocytosis	17	8	2.87	2.13338	0.00377
GO:0055007	cardiac muscle cell differentiation	32	15	5.41	2.12816	< 0.001
GO:0071385	cellular response to glucocorticoid stimulus	15	7	2.54	2.10986	0.00711
GO:0048286	lung alveolus development	15	7	2.54	2.10986	0.00711
GO:0055081	anion homeostasis	15	7	2.54	2.10986	0.00711
GO:0000186	activation of MAPKK activity	24	11	4.06	2.06451	0.0009
GO:0007613	memory	29	13	4.9	2.00736	< 0.001
GO:0051646	mitochondrion localization	18	8	3.04	1.98118	0.00579
GO:0045668	negative regulation of osteoblast differentiation	18	8	3.04	1.98118	0.00579
GO:0016578	histone deubiquitination	18	8	3.04	1.98118	0.00579
GO:0032922	circadian regulation of gene expression	38	16	6.42	1.84929	< 0.001
GO:0035023	regulation of Rho protein signal transduction	25	10	4.23	1.71914	0.00707
GO:0010171	body morphogenesis	25	10	4.23	1.71914	0.00908
GO:0030512	negative regulation of transforming growth factor beta receptor signaling pathway	33	13	5.58	1.68461	0.00177
GO:0120009	intermembrane lipid transfer	27	10	4.56	1.53816	0.00973
GO:0000381	regulation of alternative mRNA splicing, via spliceosome	30	11	5.07	1.51579	0.00743
GO:0032465	regulation of cytokinesis	47	17	7.95	1.48868	< 0.001
GO:0090090	negative regulation of canonical Wnt signaling pathway	45	16	7.61	1.44931	0.00195
GO:0072080	nephron tubule development	17	6	2.87	1.42642	0.00352
GO:0021987	cerebral cortex development	37	13	6.26	1.42076	0.0046
GO:0051056	regulation of small GTPase mediated signal transduction	88	30	14.88	1.36449	0.00814
GO:0055088	lipid homeostasis	53	18	8.96	1.34874	0.00435
GO:0045598	regulation of fat cell differentiation	57	19	9.64	1.30849	0.00481
GO:0090263	positive regulation of canonical Wnt signaling pathway	45	15	7.61	1.30608	0.0054
GO:0043966	histone H3 acetylation	42	14	7.1	1.30548	0.00709
GO:2000027	regulation of animal organ morphogenesis	43	14	7.27	1.25465	0.00309
GO:1902017	regulation of cilium assembly	34	11	5.75	1.23934	0.00377
GO:0051893	regulation of focal adhesion assembly	28	9	4.73	1.22427	0.00581
GO:0043547	positive regulation of GTPase activity	183	58	30.94	1.22285	< 0.001
GO:0045944	positive regulation of transcription by RNA polymerase II	504	154	85.21	1.2025	< 0.001
GO:0001892	embryonic placenta development	41	13	6.93	1.19755	< 0.001
GO:0000122	negative regulation of transcription by RNA polymerase II	387	119	65.43	1.19444	< 0.001
GO:0010508	positive regulation of autophagy	84	26	14.2	1.15396	0.00948
GO:0045893	positive regulation of transcription, DNA-templated	692	203	117	1.14443	< 0.001
GO:0050679	positive regulation of epithelial cell proliferation	50	15	8.45	1.08267	0.00664
GO:0070848	response to growth factor	204	58	34.49	0.994453	0.00461
GO:0031023	microtubule organizing center organization	92	26	15.55	0.965909	0.00897
GO:0046777	protein autophosphorylation	105	28	17.75	0.850209	0.00174
GO:0007088	regulation of mitotic nuclear division	73	19	12.34	0.798256	0.00839
GO:0009416	response to light stimulus	135	35	22.82	0.797485	0.00254
GO:0048812	neuron projection morphogenesis	157	40	26.54	0.765242	0.0025
GO:0032868	response to insulin	95	24	16.06	0.742017	< 0.001
GO:0048468	cell development	666	158	112.6	0.672292	0.00825
GO:0001701	in utero embryonic development	174	42	29.42	0.660554	0.00642
GO:0031333	negative regulation of protein complex assembly	71	17	12	0.635767	0.00102
GO:0007165	signal transduction	2066	444	349.3	0.583842	< 0.001
GO:0008285	negative regulation of cell proliferation	255	58	43.11	0.551594	0.00182
GO:0006468	protein phosphorylation	887	196	149.96	0.542004	< 0.001
GO:0007052	mitotic spindle organization	62	14	10.48	0.523781	0.00074
GO:0035556	intracellular signal transduction	1156	242	195.44	0.445717	< 0.001
GO:0006511	ubiquitin-dependent protein catabolic process	334	69	56.47	0.371546	0.00735
GO:0032204	regulation of telomere maintenance	63	13	10.65	0.356554	0.00483

## Sheet: Table_S2B
Biological Processes Enriched in Mediterranean Genes Compared to Other Measured Genes
GO ID	GO Term	Annotated	Significant	Expected	Log2-Odds Ratio	p-value
GO:1904851	positive regulation of establishment of protein localization to telomere	10	8	2.47	3.6124	< 0.001
GO:0006099	tricarboxylic acid cycle	22	16	5.44	3.03204	< 0.001
GO:0006448	regulation of translational elongation	13	9	3.21	2.78256	0.00089
GO:0006120	mitochondrial electron transport, NADH to ubiquinone	13	9	3.21	2.78256	0.00089
GO:0006614	SRP-dependent cotranslational protein targeting to membrane	15	10	3.71	2.6131	0.00071
GO:0010592	positive regulation of lamellipodium assembly	11	7	2.72	2.41861	0.00702
GO:0001916	positive regulation of T cell mediated cytotoxicity	11	7	2.72	2.41861	0.00702
GO:0035751	regulation of lysosomal lumen pH	11	7	2.72	2.41861	0.00702
GO:0001732	formation of cytoplasmic translation initiation complex	13	8	3.21	2.28979	0.0052
GO:0019081	viral translation	13	8	3.21	2.28979	0.0052
GO:0002181	cytoplasmic translation	44	26	10.87	2.15173	0.00105
GO:0060998	regulation of dendritic spine development	17	10	4.2	2.12722	0.0028
GO:0006414	translational elongation	48	27	11.86	1.9838	0.00056
GO:0032212	positive regulation of telomere maintenance via telomerase	27	15	6.67	1.93689	0.00058
GO:0015986	ATP synthesis coupled proton transport	29	16	7.17	1.91499	< 0.001
GO:0006119	oxidative phosphorylation	63	34	15.57	1.85377	< 0.001
GO:0042274	ribosomal small subunit biogenesis	26	14	6.42	1.83667	0.00194
GO:0045454	cell redox homeostasis	35	18	8.65	1.69837	0.00058
GO:0032981	mitochondrial respiratory chain complex I assembly	40	20	9.88	1.61661	< 0.001
GO:0022900	electron transport chain	95	47	23.47	1.59869	< 0.001
GO:0000387	spliceosomal snRNP assembly	31	15	7.66	1.52095	0.00358
GO:0034314	Arp2/3 complex-mediated actin nucleation	25	12	6.18	1.4972	0.00071
GO:1902600	proton transmembrane transport	89	42	21.99	1.46352	0.00275
GO:0006413	translational initiation	83	37	20.51	1.30842	< 0.001
GO:0006412	translation	594	254	146.78	1.29337	< 0.001
GO:0006518	peptide metabolic process	666	278	164.57	1.24047	0.0025
GO:0006457	protein folding	83	36	20.51	1.23695	< 0.001
GO:0006986	response to unfolded protein	54	20	13.34	0.84792	0.00392
GO:0042554	superoxide anion generation	14	5	3.46	0.760767	0.00373
GO:0008637	apoptotic mitochondrial changes	62	21	15.32	0.64733	0.00933
GO:0055114	oxidation-reduction process	560	185	138.38	0.633699	0.00597
GO:0000398	mRNA splicing, via spliceosome	188	62	46.45	0.598757	0.00148
GO:0051603	proteolysis involved in cellular protein catabolic process	401	128	99.09	0.542304	< 0.001
GO:0006417	regulation of translation	204	64	50.41	0.490758	0.00957
GO:0051851	modification by host of symbiont morphology or physiology	40	12	9.88	0.386902	0.00941
GO:0015031	protein transport	767	226	189.53	0.384704	< 0.001
GO:0044267	cellular protein metabolic process	2840	783	701.76	0.326765	0.0053
GO:0006470	protein dephosphorylation	179	51	44.23	0.286076	0.00907
GO:0046907	intracellular transport	772	217	190.76	0.278901	0.00071
GO:0034504	protein localization to nucleus	155	39	38.3	0.0354305	0.00919

## Sheet: Table_S3
Transcription Factor Binding Site Motif Enrichment
Motif Name	Target Sequences with Motif	Background Sequences with Motif	HB-adjusted p-value†	Log2-Odds Ratio	Effect of Diet on TF Expression
					βdiet	FDRdiet
Transcription Factor Binding Motifs Enriched in “Mediterranean Genes”
CRX	0.9977	0.9928	0.0225	0.00710296	NA	NA
E2F4	0.6289	0.5569	< 0.001	0.175412	0.02	0.237
ELF1	0.6739	0.6072	< 0.001	0.150363	0.15	0.03
ELF5	0.7682	0.7382	0.0174	0.0574702	NA	NA
ELK1	0.7186	0.6448	< 0.001	0.156337	0.01	0.348
ELK4	0.7178	0.6497	< 0.001	0.143808	0.11	0.12
ETS	0.5128	0.4477	< 0.001	0.195864	0.02	0.346
ETV4	0.8782	0.8516	0.0057	0.0443736	NA	NA
EWS:FLI1-FUSION	0.6396	0.6069	0.0209	0.0757111	NA	NA
GSC	0.9771	0.9607	0.0007	0.0244202	NA	NA
IRF1	0.2608	0.234	0.0334	0.156435	-0.04	0.342
IRF3	0.5254	0.4931	0.0244	0.0915359	0.24	0.008
IRF8	0.501	0.4617	0.0045	0.117855	0.16	0.046
KLF3	0.6793	0.6336	0.0004	0.100477	0.09	0.103
KLF5	0.9038	0.8832	0.0225	0.0332634	NA	NA
LHX1	0.8793	0.8565	0.0214	0.0379022	NA	NA
LHX3	0.9465	0.9304	0.0225	0.0247514	NA	NA
LXRE	0.3501	0.3218	0.0425	0.121603	NA	NA
MAZ	0.8343	0.8027	0.0031	0.0557053	0.02	0.253
MEF2A	0.8057	0.7711	0.0022	0.0633248	0	0.361
MEF2B	0.9217	0.8976	0.0025	0.0382246	NA	NA
MEF2C	0.8221	0.7957	0.0214	0.0470893	0.21	0.025
NKX6.1	0.9863	0.9768	0.0209	0.0139633	NA	NA
NRF	0.2589	0.2293	0.0174	0.175159	NA	NA
NRF1	0.2535	0.2109	0.0001	0.265427	-0.06	0.159
PU.1-IRF	0.9416	0.9185	0.001	0.0358346	NA	NA
SP1	0.5731	0.517	< 0.001	0.148623	0.15	0.022
SP2	0.9244	0.8971	0.0005	0.0432484	-0.31	0.044
SP5	0.8694	0.8369	0.0007	0.0549648	NA	NA
SPDEF	0.8385	0.8157	0.0442	0.0397721	NA	NA
YY1	0.1676	0.1356	0.0008	0.305665	0.02	0.276
ZBTB33	0.0916	0.07	0.0035	0.387993	0.19	0.03
ZFX	0.8656	0.8397	0.0112	0.0438265	-0.05	0.109
ZNF711	0.9595	0.9383	0.0005	0.0322335	-0.06	0.245
Transcription Factor Binding Motifs Enriched in “Western Genes”
ATF2	0.4575	0.4087	0.0067	0.16273	-0.02	0.246
† Holm-Benjamini adjusted p-value

## Sheet: Table_S4A
Diet Correlation and Gene Set Enrichment of Weighted Gene Co-Expression Network Analysis (WGCNA) Co-Expression Modules
Module	Genes in Module	Module Eigengenes			Polarization-Associated Genes
		t Statistic (Wetern diet vs. Mediterranean diet)	df	HB-adjusted p-value†	M1 Genes (Proinflammatory)						M2 Genes (Regulatory)
					Genes	Log2-Odds Ratio			Result	HB-adjusted p-value†	Genes	Log2-Odds Ratio			Result	HB-adjusted p-value†
						Statistic	95% Confidence Interval					Statistic	95% Confidence Interval
							Low	High					Low	High
Module 1	110	-1.30278	30.8718	1	14	1.28694	0.354927	2.11265		0.150148	3	1.31665	-1.00149	2.93227		1
Module 2	92	-0.109686	23.9312	1	10	1.02232	-0.0973244	1.98214		1	1	-0.0537538	-5.38339	2.4842		1
Module 3	161	-3.05904	32.8562	0.0527574	8	-0.212477	-1.45594	0.810493		1	2	0.143519	-2.92938	2.04731		1
Module 4	113	-0.914043	31.3782	1	5	-0.388616	-2.04498	0.885256		1	1	-0.355817	-5.68257	2.17553		1
Module 5	7773	-3.92212	28.2898	0.00765786	383	-0.549668	-0.77576	-0.322933	depleted	< 0.001	84	-0.163588	-0.676996	0.360332		1
Module 6	341	-2.73773	32.6621	0.109262	20	0.0442777	-0.695925	0.707214		1	1	-1.98549	-7.30311	0.52648		1
Module 7	97	1.48049	32.9274	1	14	1.49846	0.558478	2.33464	enriched	0.0335009	1	-0.131516	-5.46035	2.4044		1
Module 8	314	3.48208	32.2997	0.0202993	11	-0.7517	-1.77636	0.117644		1	7	1.03761	-0.317197	2.138		1
Module 9	350	2.46749	32.2295	0.191003	28	0.542141	-0.0816714	1.11431		1	4	0.0203938	-1.88457	1.42313		1
Module 10	2204	3.12931	32.9565	0.0475161	186	0.777725	0.517852	1.03291	enriched	< 0.001	21	-0.294141	-1.04254	0.388341		1
Module 11	94	0.845748	32.0686	1	0	neg Inf	neg Inf	-0.60323		0.17417	0	neg Inf	neg Inf	1.81928		1
Module 12	105	1.21494	28.3095	1	3	-1.04652	-3.35153	0.547477		1	3	1.38625	-0.932939	3.00398		1
Module 13	54	-0.537443	30.031	1	2	-0.655276	-3.7416	1.27549		1	7	3.77598	2.3577	4.96623	enriched	< 0.001
Module 14	268	-1.75323	32.7894	0.800173	10	-0.653579	-1.73781	0.257709		1	1	-1.62787	-6.94682	0.886644		1
Module 15	158	1.23203	27.555	1	4	-1.23028	-3.1286	0.161904		1	2	0.171359	-2.9018	2.07563		1
† Holm-Benjamini adjusted p-value

## Sheet: Table_S4B
Biological Processes Enriched in WGCNA Co-Expression Modules
Module	GO ID	GO Term	Annotated	Significant	Expected	Log2-Odds Ratio	p-value
Module 4	GO:0051607	defense response to virus	124	24	1.24	5.11898	< 0.001
Module 4	GO:0045071	negative regulation of viral genome replication	29	10	0.29	5.9113	< 0.001
Module 4	GO:0035455	response to interferon-alpha	10	5	0.1	6.73192	< 0.001
Module 4	GO:0045087	innate immune response	235	22	2.34	3.82255	< 0.001
Module 4	GO:0032728	positive regulation of interferon-beta production	25	4	0.25	4.31574	< 0.001
Module 4	GO:0062208	positive regulation of pattern recognition receptor signaling pathway	26	4	0.26	4.24843	< 0.001
Module 4	GO:0031349	positive regulation of defense response	121	8	1.21	2.9539	< 0.001
Module 4	GO:0060339	negative regulation of type I interferon-mediated signaling pathway	12	3	0.12	5.10514	< 0.001
Module 4	GO:1902187	negative regulation of viral release from host cell	13	3	0.13	4.95293	< 0.001
Module 4	GO:0039535	regulation of RIG-I signaling pathway	14	3	0.14	4.81523	< 0.001
Module 5	GO:0006412	translation	462	328	285.25	0.231334	< 0.001
Module 5	GO:0055114	oxidation-reduction process	396	301	244.5	0.659652	< 0.001
Module 5	GO:1990542	mitochondrial transmembrane transport	46	41	28.4	2.31277	< 0.001
Module 8	GO:0006357	regulation of transcription by RNA polymerase II	733	25	14.13	0.965953	< 0.001
Module 9	GO:0006955	immune response	542	32	15.71	1.18666	< 0.001
Module 9	GO:0006954	inflammatory response	220	25	6.38	2.23341	< 0.001
Module 10	GO:0043547	positive regulation of GTPase activity	165	70	32.86	1.57906	< 0.001
Module 10	GO:0070076	histone lysine demethylation	16	13	3.19	4.1289	< 0.001
Module 10	GO:0045944	positive regulation of transcription by RNA polymerase II	439	129	87.43	0.729388	< 0.001
Module 10	GO:0051056	regulation of small GTPase mediated signal transduction	84	37	16.73	1.66952	< 0.001
Module 12	GO:0002250	adaptive immune response	144	12	1.42	3.42484	< 0.001
Module 12	GO:0050852	T cell receptor signaling pathway	59	10	0.58	4.56179	< 0.001
Module 12	GO:0032729	positive regulation of interferon-gamma production	34	5	0.33	4.21264	< 0.001
Module 13	GO:0006334	nucleosome assembly	43	3	0.08	5.76626	< 0.001
Module 14	GO:0006355	regulation of transcription, DNA-templated	1372	56	33.94	0.958144	< 0.001

## Sheet: Table_S5A
Gene Pair Correlations Across and Within Diet Groups
Gene 1		Gene 2		Correlation			p-value	FDR
Ensembl Gene ID	Gene Name	Ensembl Gene ID	Gene Name	Overall	Western	Mediterranean
ENSMFAG00000033871	DCUN1D5	ENSMFAG00000039480	STAM2	0.169963	0.753302	-0.621711	4.57957e-07	0
ENSMFAG00000043879	BAG2	ENSMFAG00000045503	CLK3	0.179979	0.690691	-0.51313	3.86797e-05	0.114281
ENSMFAG00000030036	RF00283	ENSMFAG00000039490	KLF11	0.0830236	0.611513	-0.634212	4.09157e-05	0.114281
ENSMFAG00000039343	PSMB1	ENSMFAG00000040571	AMPD2	-0.309707	-0.806526	0.364546	5.31222e-05	0.114281
ENSMFAG00000014913	RF00019	ENSMFAG00000043557	HAUS1	-0.212885	-0.700679	0.449121	5.55859e-05	0.114281
ENSMFAG00000039303	CDK10	ENSMFAG00000044349	CCNQ	-0.167579	-0.660259	0.501059	7.00131e-05	0.114281
ENSMFAG00000045642	MTSS1	ENSMFAG00000046314	NEK8	0.298928	0.7424	-0.302926	7.75813e-05	0.114281
ENSMFAG00000038029	FOSB	ENSMFAG00000043364	C1orf174	-0.320286	-0.770442	0.29064	7.90499e-05	0.114281
ENSMFAG00000002731	FBRS	ENSMFAG00000008229	RF00017	0.0871446	0.49723	-0.4694	8.84246e-05	0.114281
ENSMFAG00000012605	MDH2	ENSMFAG00000038993	LMO2	0.267416	0.749202	-0.386435	9.24901e-05	0.114281
ENSMFAG00000021547		ENSMFAG00000035596	NUDCD2	-0.0452152	0.374475	-0.614794	9.57556e-05	0.114281
ENSMFAG00000021347	RF01957	ENSMFAG00000043030	RGCC	0.320191	0.74489	-0.256187	9.60496e-05	0.114281
ENSMFAG00000000797	SFPQ	ENSMFAG00000018679	RF00492	0.337819	0.778955	-0.260866	0.000104315	0.114281
ENSMFAG00000021347	RF01957	ENSMFAG00000044349	CCNQ	-0.146035	-0.646454	0.533105	0.000104326	0.114281
ENSMFAG00000024592	GAR1	ENSMFAG00000030528	ANAPC7	0.239516	0.689865	-0.371671	0.000115193	0.114281
ENSMFAG00000002731	FBRS	ENSMFAG00000034830	MIR27A	0.151602	0.468321	-0.278231	0.000145201	0.114281
ENSMFAG00000015800	MIR23A	ENSMFAG00000038993	LMO2	-0.163055	-0.644884	0.490855	0.000154188	0.114281
ENSMFAG00000002731	FBRS	ENSMFAG00000017987	ANKRD42	0.23347	0.602735	-0.267675	0.000157854	0.114281
ENSMFAG00000021547		ENSMFAG00000044585	ARL13B	0.0170589	0.475614	-0.605266	0.000172973	0.114281
ENSMFAG00000007053		ENSMFAG00000034679	PCF11	0.136562	0.526737	-0.392962	0.000192326	0.114281
ENSMFAG00000044201	C9orf131	ENSMFAG00000045542	FOXJ1	0.0344201	0.407089	-0.471345	0.000193714	0.114281
ENSMFAG00000039480	STAM2	ENSMFAG00000046307	NDUFAF3	-0.347311	-0.794592	0.259714	0.000194323	0.114281
ENSMFAG00000043364	C1orf174	ENSMFAG00000043879	BAG2	-0.0788133	-0.581723	0.603706	0.00019961	0.114281
ENSMFAG00000003526	MRPL4	ENSMFAG00000030528	ANAPC7	0.391527	0.825564	-0.197523	0.000204851	0.114281
ENSMFAG00000024592	GAR1	ENSMFAG00000040571	AMPD2	-0.36464	-0.79907	0.224943	0.000208122	0.114281
ENSMFAG00000039303	CDK10	ENSMFAG00000044806	DMAC1	-0.215648	-0.63731	0.356606	0.000232311	0.121301
ENSMFAG00000038993	LMO2	ENSMFAG00000046314	NEK8	-0.264361	-0.704222	0.332592	0.000237002	0.121301
ENSMFAG00000045385	IFRD1	ENSMFAG00000045642	MTSS1	0.255232	0.577032	-0.181497	0.000244297	0.121946
ENSMFAG00000039480	STAM2	ENSMFAG00000043364	C1orf174	0.204639	0.655454	-0.407181	0.000259854	0.124949
ENSMFAG00000030808	MEF2D	ENSMFAG00000039490	KLF11	0.295028	0.723444	-0.286393	0.000270471	0.126301
ENSMFAG00000030808	MEF2D	ENSMFAG00000035596	NUDCD2	-0.225154	-0.740393	0.474099	0.000284207	0.126301
ENSMFAG00000039480	STAM2	ENSMFAG00000039490	KLF11	-0.354712	-0.770786	0.20996	0.000287294	0.126301
ENSMFAG00000030606	ARMCX5	ENSMFAG00000045642	MTSS1	-0.152803	-0.460881	0.265303	0.000303734	0.128809
ENSMFAG00000011575		ENSMFAG00000030036	RF00283	-0.176049	-0.548491	0.329408	0.000325841	0.131071
ENSMFAG00000030036	RF00283	ENSMFAG00000043879	BAG2	0.0887384	0.424567	-0.367028	0.000366146	0.131071
ENSMFAG00000030036	RF00283	ENSMFAG00000034830	MIR27A	0.210024	0.586798	-0.301312	0.000376746	0.131071
ENSMFAG00000002833		ENSMFAG00000014913	RF00019	-0.117056	-0.554649	0.476821	0.00037759	0.131071
ENSMFAG00000024592	GAR1	ENSMFAG00000044349	CCNQ	0.244918	0.652097	-0.307681	0.000381859	0.131071
ENSMFAG00000002731	FBRS	ENSMFAG00000045542	FOXJ1	-0.0107198	0.440669	-0.623319	0.000408296	0.131071
ENSMFAG00000030036	RF00283	ENSMFAG00000031372	SOX4	0.231951	0.714222	-0.42256	0.000427544	0.131071
ENSMFAG00000010600	RF00019	ENSMFAG00000033871	DCUN1D5	-0.149015	-0.50333	0.331841	0.000427589	0.131071
ENSMFAG00000010161	MIR612	ENSMFAG00000044839	JMY	0.159946	0.78476	-0.688015	0.000427987	0.131071
ENSMFAG00000039480	STAM2	ENSMFAG00000045503	CLK3	-0.205489	-0.684312	0.444342	0.000481915	0.138438
ENSMFAG00000034679	PCF11	ENSMFAG00000043030	RGCC	0.301285	0.7767	-0.343922	0.000485542	0.138438
ENSMFAG00000010600	RF00019	ENSMFAG00000043879	BAG2	0.21783	0.616354	-0.323023	0.00048998	0.138438
ENSMFAG00000030808	MEF2D	ENSMFAG00000043879	BAG2	0.184162	0.752466	-0.587109	0.000499857	0.138438
ENSMFAG00000001850	USP20	ENSMFAG00000044349	CCNQ	0.00656519	-0.431965	0.601713	0.000499965	0.138438
ENSMFAG00000002731	FBRS	ENSMFAG00000007053		0.206077	0.675366	-0.430816	0.000502529	0.138438
ENSMFAG00000035432	ZNF335	ENSMFAG00000045642	MTSS1	0.379293	0.728012	-0.0939692	0.00051229	0.138438
ENSMFAG00000008657		ENSMFAG00000044349	CCNQ	-0.24935	-0.693988	0.354088	0.000518308	0.138438
ENSMFAG00000030036	RF00283	ENSMFAG00000038029	FOSB	0.212237	0.724899	-0.483518	0.000527382	0.138438
ENSMFAG00000024592	GAR1	ENSMFAG00000035596	NUDCD2	0.151997	0.542205	-0.377571	0.000537079	0.138438
ENSMFAG00000010161	MIR612	ENSMFAG00000043879	BAG2	0.167009	0.681822	-0.531665	0.00055314	0.138438
ENSMFAG00000030808	MEF2D	ENSMFAG00000038545	ATP6AP2	-0.491368	-0.87	0.0224892	0.000572184	0.138438
ENSMFAG00000002731	FBRS	ENSMFAG00000013579	UTP3	-0.266931	-0.739349	0.374209	0.000592181	0.138438
ENSMFAG00000030036	RF00283	ENSMFAG00000036654	NR4A2	0.267742	0.692333	-0.308488	0.000610885	0.138438
ENSMFAG00000037252	GTPBP1	ENSMFAG00000043879	BAG2	0.192394	0.779461	-0.60434	0.000627189	0.138438
ENSMFAG00000010145	RF01955	ENSMFAG00000043030	RGCC	0.410623	0.78146	-0.0926548	0.000649535	0.138438
ENSMFAG00000028589		ENSMFAG00000031372	SOX4	-0.0600746	-0.470732	0.497247	0.000659272	0.138438
ENSMFAG00000037252	GTPBP1	ENSMFAG00000045642	MTSS1	0.358423	0.738081	-0.156827	0.000667759	0.138438
ENSMFAG00000002731	FBRS	ENSMFAG00000042966	C6orf89	-0.340638	-0.71499	0.16741	0.000679993	0.138438
ENSMFAG00000031372	SOX4	ENSMFAG00000038993	LMO2	-0.0511078	-0.487328	0.540906	0.000681562	0.138438
ENSMFAG00000024592	GAR1	ENSMFAG00000033387	NGDN	0.240806	0.663842	-0.333315	0.000689979	0.138438
ENSMFAG00000035596	NUDCD2	ENSMFAG00000044569	TP53INP2	-0.204074	-0.627224	0.370202	0.000695828	0.138438
ENSMFAG00000011575		ENSMFAG00000040571	AMPD2	-0.137541	-0.590548	0.477253	0.000712131	0.138438
ENSMFAG00000018679	RF00492	ENSMFAG00000039490	KLF11	0.356245	0.730317	-0.151425	0.00071366	0.138438
ENSMFAG00000037092	UBXN7	ENSMFAG00000045642	MTSS1	0.236166	0.615176	-0.278206	0.000738297	0.138438
ENSMFAG00000011354	RF00019	ENSMFAG00000030036	RF00283	0.178142	0.576235	-0.362128	0.000741599	0.138438
ENSMFAG00000030808	MEF2D	ENSMFAG00000044806	DMAC1	-0.290494	-0.697956	0.262491	0.000749333	0.138438
ENSMFAG00000030808	MEF2D	ENSMFAG00000039343	PSMB1	-0.419824	-0.878094	0.202113	0.000755208	0.138438
ENSMFAG00000044839	JMY	ENSMFAG00000045642	MTSS1	0.304938	0.71703	-0.254331	0.000761645	0.138438
ENSMFAG00000010145	RF01955	ENSMFAG00000040571	AMPD2	0.475416	0.885893	-0.0816595	0.000765132	0.138438
ENSMFAG00000035432	ZNF335	ENSMFAG00000039480	STAM2	-0.202109	-0.610948	0.352743	0.000780586	0.138438
ENSMFAG00000008657		ENSMFAG00000043879	BAG2	0.158586	0.652368	-0.511546	0.000791915	0.138438
ENSMFAG00000002731	FBRS	ENSMFAG00000038029	FOSB	0.313265	0.60818	-0.0869774	0.000796521	0.138438
ENSMFAG00000000797	SFPQ	ENSMFAG00000038128	PSMB9	-0.236426	-0.619709	0.283744	0.000806259	0.138506
ENSMFAG00000017987	ANKRD42	ENSMFAG00000030036	RF00283	0.275555	0.658941	-0.244755	0.000817145	0.138506
ENSMFAG00000043879	BAG2	ENSMFAG00000044569	TP53INP2	0.154936	0.705062	-0.591664	0.000820772	0.138506
ENSMFAG00000001643		ENSMFAG00000030036	RF00283	0.107685	0.541527	-0.481102	0.000839461	0.138506
ENSMFAG00000021421	RF01956	ENSMFAG00000043030	RGCC	0.432309	0.788397	-0.0509535	0.000841556	0.138506
ENSMFAG00000015800	MIR23A	ENSMFAG00000044217	TSN	-0.268479	-0.747393	0.381476	0.000841659	0.138506
ENSMFAG00000002731	FBRS	ENSMFAG00000040113	PPA2	-0.18355	-0.635358	0.429618	0.00084914	0.139367
ENSMFAG00000031372	SOX4	ENSMFAG00000037026	RNF34	-0.0776357	-0.464956	0.448014	0.000854882	0.139367
ENSMFAG00000012605	MDH2	ENSMFAG00000036654	NR4A2	-0.230779	-0.673048	0.369441	0.000869721	0.141006
ENSMFAG00000000797	SFPQ	ENSMFAG00000017987	ANKRD42	0.264665	0.631482	-0.233159	0.000870786	0.141006
ENSMFAG00000035432	ZNF335	ENSMFAG00000040571	AMPD2	0.424831	0.773571	-0.0484595	0.000889117	0.141797
ENSMFAG00000037854	HECA	ENSMFAG00000039480	STAM2	-0.203827	-0.599336	0.332935	0.000954963	0.147496
ENSMFAG00000044201	C9orf131	ENSMFAG00000044806	DMAC1	-0.094698	-0.5205	0.483176	0.000970793	0.147496
ENSMFAG00000038993	LMO2	ENSMFAG00000039303	CDK10	-0.358515	-0.78399	0.218915	0.000978976	0.147496
ENSMFAG00000037026	RNF34	ENSMFAG00000045385	IFRD1	-0.393644	-0.715494	0.0431525	0.0010159	0.147496
ENSMFAG00000039480	STAM2	ENSMFAG00000040113	PPA2	0.271933	0.673949	-0.273659	0.00101867	0.147496
ENSMFAG00000012605	MDH2	ENSMFAG00000043030	RGCC	-0.300753	-0.74955	0.30833	0.00102659	0.147496
ENSMFAG00000002731	FBRS	ENSMFAG00000044806	DMAC1	-0.169317	-0.604241	0.420937	0.00103008	0.147496
ENSMFAG00000021347	RF01957	ENSMFAG00000038993	LMO2	-0.463885	-0.835478	0.0404184	0.00103247	0.147496
ENSMFAG00000021347	RF01957	ENSMFAG00000036654	NR4A2	0.159901	0.560827	-0.384214	0.00107712	0.147496
ENSMFAG00000039490	KLF11	ENSMFAG00000044569	TP53INP2	0.387153	0.827642	-0.210653	0.00110128	0.147496
ENSMFAG00000010161	MIR612	ENSMFAG00000042966	C6orf89	-0.244479	-0.649492	0.305182	0.00111609	0.147496
ENSMFAG00000001643		ENSMFAG00000018679	RF00492	0.252394	0.682557	-0.331399	0.00114229	0.147496
ENSMFAG00000010161	MIR612	ENSMFAG00000044806	DMAC1	-0.303208	-0.688727	0.219997	0.00115727	0.147496
ENSMFAG00000010145	RF01955	ENSMFAG00000039480	STAM2	-0.204354	-0.658991	0.412654	0.00117072	0.147496
ENSMFAG00000008229	RF00017	ENSMFAG00000044201	C9orf131	0.178511	0.484075	-0.236182	0.00117619	0.147496
ENSMFAG00000002177	ITFG2	ENSMFAG00000028589		-0.00502951	-0.444748	0.591731	0.00119278	0.147496
ENSMFAG00000011575		ENSMFAG00000038140	ABT1	0.0532874	0.415783	-0.438671	0.00120758	0.147496
ENSMFAG00000010161	MIR612	ENSMFAG00000043560	FBXO4	-0.245133	-0.767757	0.464142	0.00120956	0.147496
ENSMFAG00000010145	RF01955	ENSMFAG00000038993	LMO2	-0.436795	-0.845245	0.117531	0.00121178	0.147496
ENSMFAG00000002731	FBRS	ENSMFAG00000003709	STX7	-0.310886	-0.755182	0.292088	0.00121235	0.147496
ENSMFAG00000012605	MDH2	ENSMFAG00000039480	STAM2	0.204762	0.67041	-0.427189	0.00128162	0.147496
ENSMFAG00000021347	RF01957	ENSMFAG00000044839	JMY	0.133151	0.604964	-0.507166	0.00131114	0.147496
ENSMFAG00000038545	ATP6AP2	ENSMFAG00000039480	STAM2	0.260694	0.650509	-0.268341	0.00132665	0.147496
ENSMFAG00000030036	RF00283	ENSMFAG00000045385	IFRD1	0.247974	0.627165	-0.266643	0.00133552	0.147496
ENSMFAG00000021421	RF01956	ENSMFAG00000039480	STAM2	-0.132292	-0.603617	0.507364	0.0013371	0.147496
ENSMFAG00000038715	NFX1	ENSMFAG00000045642	MTSS1	0.335573	0.658594	-0.102812	0.00134897	0.147496
ENSMFAG00000037394	MRPL46	ENSMFAG00000045385	IFRD1	-0.324517	-0.707687	0.195498	0.00135348	0.147496
ENSMFAG00000037691	EIF2S1	ENSMFAG00000038993	LMO2	0.378841	0.770672	-0.152929	0.00135678	0.147496
ENSMFAG00000021914	RF00190	ENSMFAG00000036654	NR4A2	0.050853	0.451675	-0.49312	0.00135696	0.147496
ENSMFAG00000000797	SFPQ	ENSMFAG00000030036	RF00283	0.205609	0.568228	-0.286515	0.00135848	0.147496
ENSMFAG00000015800	MIR23A	ENSMFAG00000037321	TSEN15	-0.169016	-0.615481	0.4369	0.00138008	0.147496
ENSMFAG00000000999	TSC22D2	ENSMFAG00000002731	FBRS	0.416992	0.740213	-0.0216655	0.00138716	0.147496
ENSMFAG00000034679	PCF11	ENSMFAG00000044806	DMAC1	-0.0770003	-0.487548	0.480172	0.00138965	0.147496
ENSMFAG00000037252	GTPBP1	ENSMFAG00000043030	RGCC	0.165007	0.62353	-0.457275	0.0013971	0.147496
ENSMFAG00000036654	NR4A2	ENSMFAG00000043364	C1orf174	-0.253243	-0.667	0.308285	0.00141298	0.148005
ENSMFAG00000043557	HAUS1	ENSMFAG00000045385	IFRD1	-0.10601	-0.548971	0.495152	0.00147245	0.150255
ENSMFAG00000007053		ENSMFAG00000040571	AMPD2	0.366648	0.810424	-0.23562	0.00147952	0.150255
ENSMFAG00000002833		ENSMFAG00000043364	C1orf174	0.36589	0.738211	-0.139402	0.00149155	0.150255
ENSMFAG00000018679	RF00492	ENSMFAG00000033777	C17orf58	-0.0210618	-0.373356	0.457052	0.00149764	0.150255
ENSMFAG00000030808	MEF2D	ENSMFAG00000044349	CCNQ	-0.22878	-0.65694	0.352295	0.0015042	0.150255
ENSMFAG00000030808	MEF2D	ENSMFAG00000043560	FBXO4	-0.29488	-0.789434	0.376299	0.00152402	0.150255
ENSMFAG00000008229	RF00017	ENSMFAG00000034679	PCF11	0.308162	0.688908	-0.208565	0.00152761	0.150255
ENSMFAG00000044217	TSN	ENSMFAG00000045642	MTSS1	-0.18232	-0.513761	0.267493	0.00155077	0.150287
ENSMFAG00000038993	LMO2	ENSMFAG00000043452	LYPLA1	0.368565	0.697078	-0.0772746	0.00158485	0.150287
ENSMFAG00000002177	ITFG2	ENSMFAG00000038993	LMO2	-0.209427	-0.6382	0.372478	0.00158563	0.150287
ENSMFAG00000030036	RF00283	ENSMFAG00000037145	PLCB2	0.15515	0.580722	-0.422412	0.00158606	0.150287
ENSMFAG00000001340		ENSMFAG00000046074	CLP1	0.400361	0.712718	-0.0235526	0.0015954	0.150287
ENSMFAG00000010161	MIR612	ENSMFAG00000038140	ABT1	-0.118994	-0.683634	0.647302	0.00160281	0.150287
ENSMFAG00000002731	FBRS	ENSMFAG00000033871	DCUN1D5	-0.425417	-0.784309	0.0616504	0.00161691	0.150722
ENSMFAG00000014913	RF00019	ENSMFAG00000037394	MRPL46	-0.130006	-0.492682	0.362197	0.00165119	0.151584
ENSMFAG00000021421	RF01956	ENSMFAG00000043879	BAG2	0.116459	0.536552	-0.453666	0.00166785	0.151584
ENSMFAG00000037691	EIF2S1	ENSMFAG00000046074	CLP1	0.216863	0.617851	-0.327334	0.00169969	0.151584
ENSMFAG00000033871	DCUN1D5	ENSMFAG00000044569	TP53INP2	-0.371359	-0.783569	0.188068	0.00172837	0.151584
ENSMFAG00000021347	RF01957	ENSMFAG00000035596	NUDCD2	-0.197689	-0.619268	0.374455	0.00173524	0.151584
ENSMFAG00000033579		ENSMFAG00000039303	CDK10	-0.235671	-0.649828	0.326399	0.00177062	0.151584
ENSMFAG00000021347	RF01957	ENSMFAG00000038140	ABT1	-0.187688	-0.62717	0.408752	0.0017765	0.151584
ENSMFAG00000032437	KAT6B	ENSMFAG00000044806	DMAC1	-0.159615	-0.570393	0.397869	0.00178027	0.151584
ENSMFAG00000007053		ENSMFAG00000039303	CDK10	0.406519	0.769812	-0.0865228	0.00178219	0.151584
ENSMFAG00000010161	MIR612	ENSMFAG00000039490	KLF11	0.200766	0.60309	-0.345246	0.0017872	0.151584
ENSMFAG00000039480	STAM2	ENSMFAG00000046314	NEK8	-0.114747	-0.493792	0.399671	0.00182198	0.151584
ENSMFAG00000028402	LRRC10B	ENSMFAG00000043030	RGCC	0.214162	0.603149	-0.313748	0.00182456	0.151584
ENSMFAG00000024592	GAR1	ENSMFAG00000044585	ARL13B	0.116056	0.474028	-0.369764	0.00184519	0.151584
ENSMFAG00000033777	C17orf58	ENSMFAG00000034679	PCF11	-0.0825668	-0.413765	0.366916	0.00184523	0.151584
ENSMFAG00000043879	BAG2	ENSMFAG00000046314	NEK8	0.076906	0.512533	-0.514302	0.00184932	0.151584
ENSMFAG00000042966	C6orf89	ENSMFAG00000044569	TP53INP2	-0.390136	-0.75475	0.104696	0.0018495	0.151584
ENSMFAG00000002731	FBRS	ENSMFAG00000043560	FBXO4	-0.168243	-0.698627	0.551564	0.00185745	0.151584
ENSMFAG00000018679	RF00492	ENSMFAG00000034679	PCF11	0.416367	0.783528	-0.0819231	0.00185944	0.151584
ENSMFAG00000038993	LMO2	ENSMFAG00000040113	PPA2	0.251664	0.665847	-0.310442	0.00186759	0.151584
ENSMFAG00000035432	ZNF335	ENSMFAG00000043879	BAG2	0.288187	0.669135	-0.228813	0.00187184	0.152142
ENSMFAG00000035432	ZNF335	ENSMFAG00000038993	LMO2	-0.417903	-0.81714	0.123919	0.00189001	0.152142
ENSMFAG00000001643		ENSMFAG00000033579		-0.307814	-0.69667	0.219918	0.00189838	0.152142
ENSMFAG00000031372	SOX4	ENSMFAG00000039480	STAM2	-0.294844	-0.721665	0.284413	0.00191989	0.152142
ENSMFAG00000001801	MMADHC	ENSMFAG00000010161	MIR612	-0.406139	-0.869611	0.222859	0.00194445	0.152142
ENSMFAG00000041067	SPATA2L	ENSMFAG00000043560	FBXO4	-0.231657	-0.666446	0.358413	0.00196206	0.152142
ENSMFAG00000000999	TSC22D2	ENSMFAG00000030036	RF00283	0.280495	0.71538	-0.309705	0.0019974	0.152142
ENSMFAG00000000797	SFPQ	ENSMFAG00000039343	PSMB1	-0.117105	-0.588509	0.522658	0.00199989	0.152142
ENSMFAG00000030528	ANAPC7	ENSMFAG00000040113	PPA2	0.252848	0.704857	-0.360592	0.00202416	0.152142
ENSMFAG00000002731	FBRS	ENSMFAG00000015800	MIR23A	0.202689	0.50434	-0.206694	0.00202646	0.152142
ENSMFAG00000042817	FAM214A	ENSMFAG00000043879	BAG2	0.151519	0.531897	-0.364708	0.00203418	0.152142
ENSMFAG00000045503	CLK3	ENSMFAG00000045642	MTSS1	0.290641	0.61282	-0.146602	0.00205448	0.152142
ENSMFAG00000000797	SFPQ	ENSMFAG00000008657		0.280384	0.665609	-0.242421	0.00205844	0.152142
ENSMFAG00000030036	RF00283	ENSMFAG00000038545	ATP6AP2	-0.273605	-0.734665	0.35212	0.00206276	0.152142
ENSMFAG00000045569	LIN7C	ENSMFAG00000046074	CLP1	0.23855	0.621893	-0.281703	0.00206679	0.152142
ENSMFAG00000021347	RF01957	ENSMFAG00000043879	BAG2	0.0483954	0.466308	-0.518772	0.00210221	0.152142
ENSMFAG00000038993	LMO2	ENSMFAG00000046307	NDUFAF3	-0.164121	-0.533982	0.337834	0.00210713	0.152142
ENSMFAG00000000999	TSC22D2	ENSMFAG00000039480	STAM2	-0.371495	-0.71362	0.092818	0.00212437	0.152142
[truncated: 9,556 more rows]

## Sheet: Table_S5B
Differentially Correlated Genes
[truncated: 125 more rows]

## Sheet: Table_S6A
Biological Processes Enriched in Behavior-Mediated Differentially-Expressed Genes (DEG)
[truncated: 13 more rows]

[truncated: 2 more sheets: Table_S6B, Table_S6C]
