# Supplementary figures and images for: Contrasting effects of Western vs Mediterranean diets on monocyte inflammatory gene expression and social behavior in a primate model
Source: eLife journal article supplement (doi:10.7554/elife.68293), 2021-08-02

# Traits Enriched in Western Genes

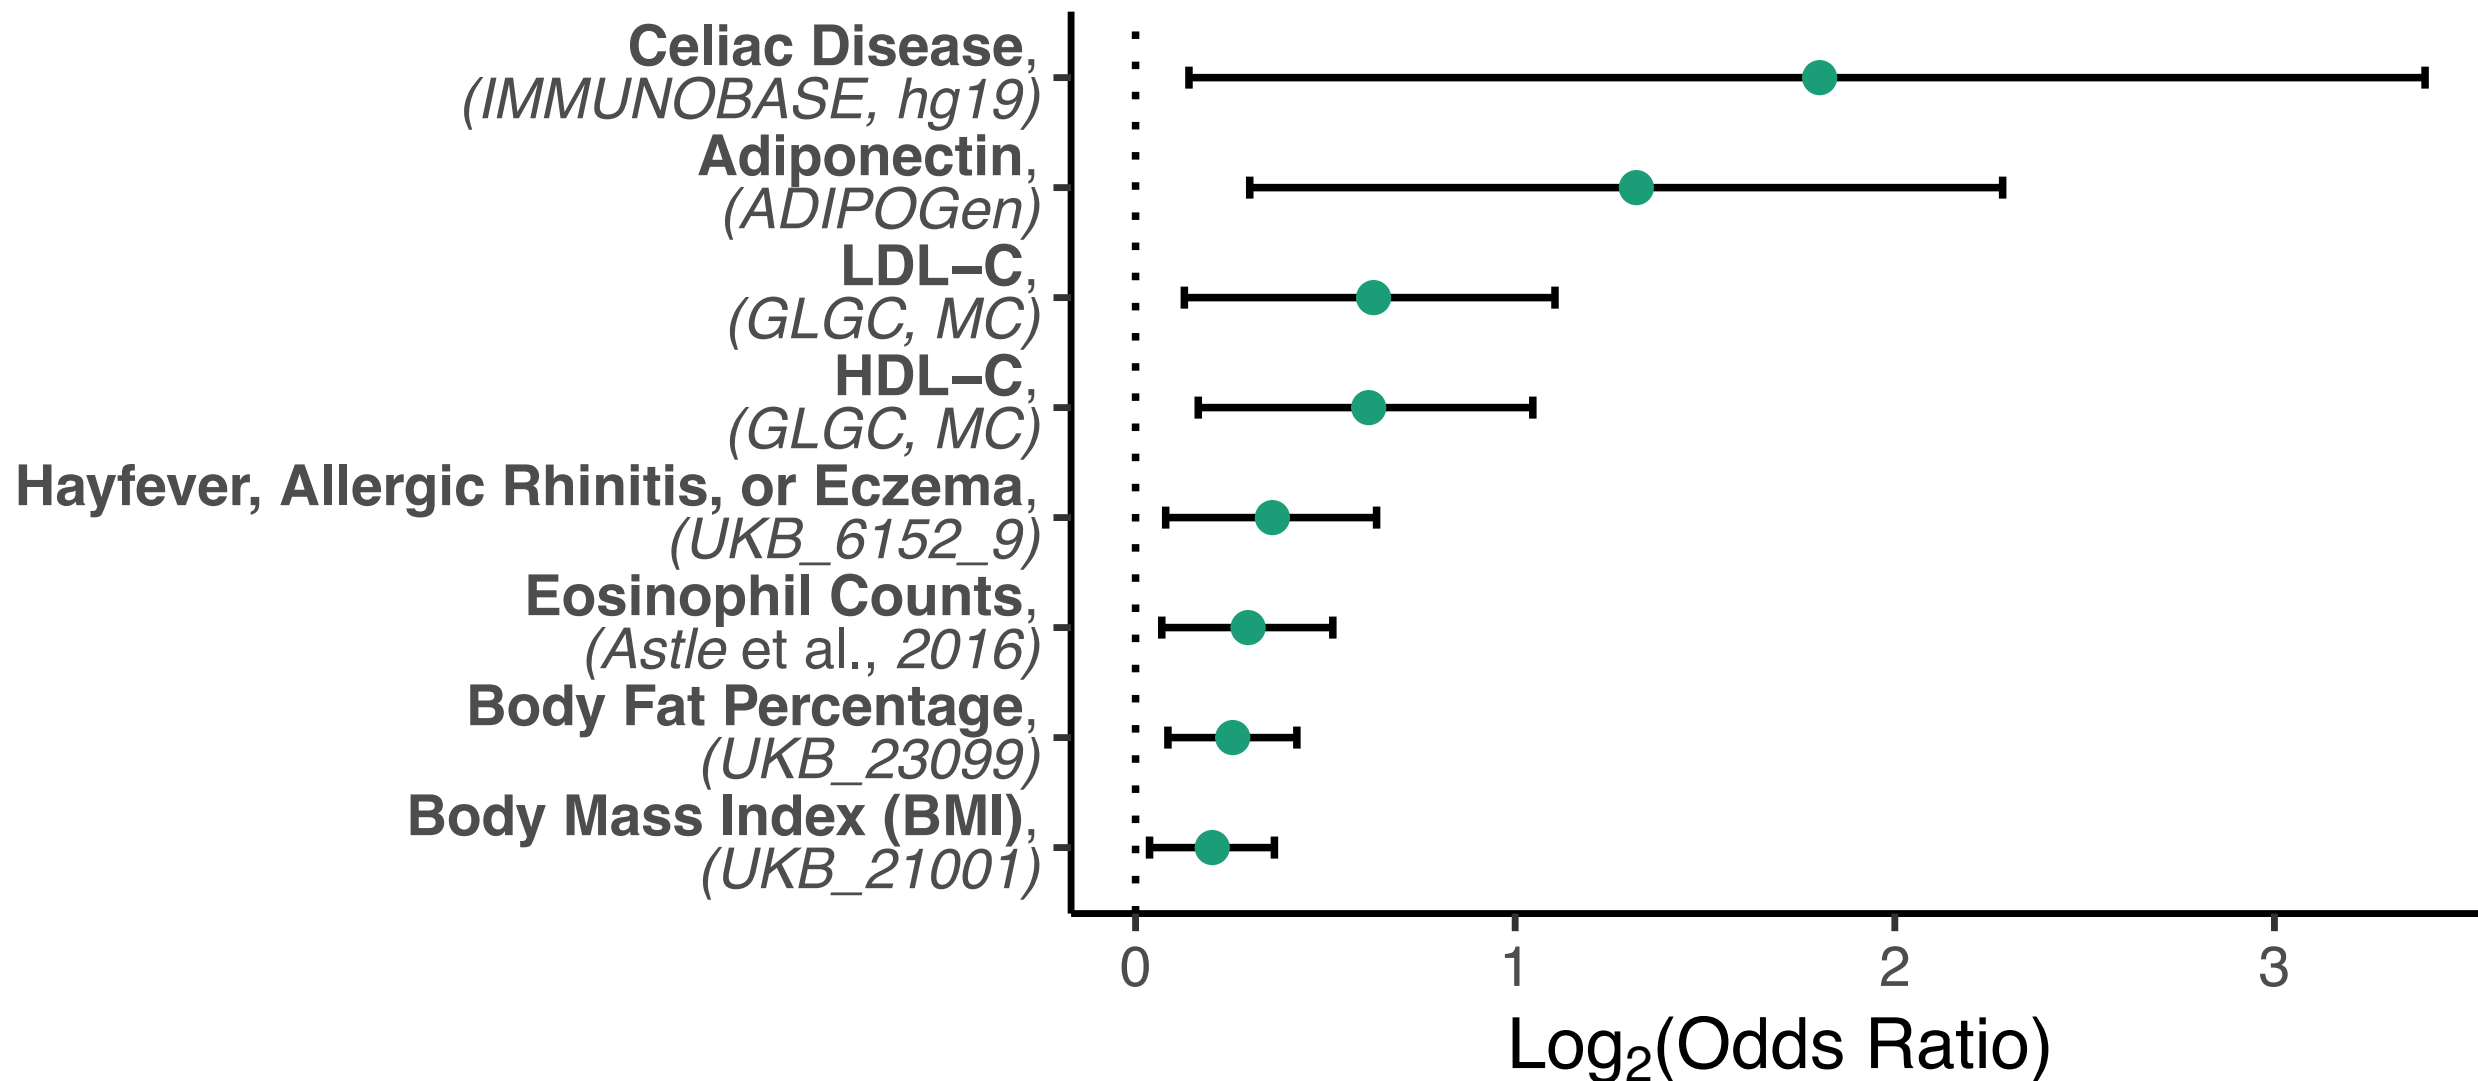

Supplement: supp [file elife_poa_e68293_Figure_1_figure_supplement_1.pdf › elife_poa_e68293_Figure_1_figure_supplement_1.pdf]

Mean Expression

Western  
Mediterranean

2  
1  
0  
-1

Antiviral

Inflammatory

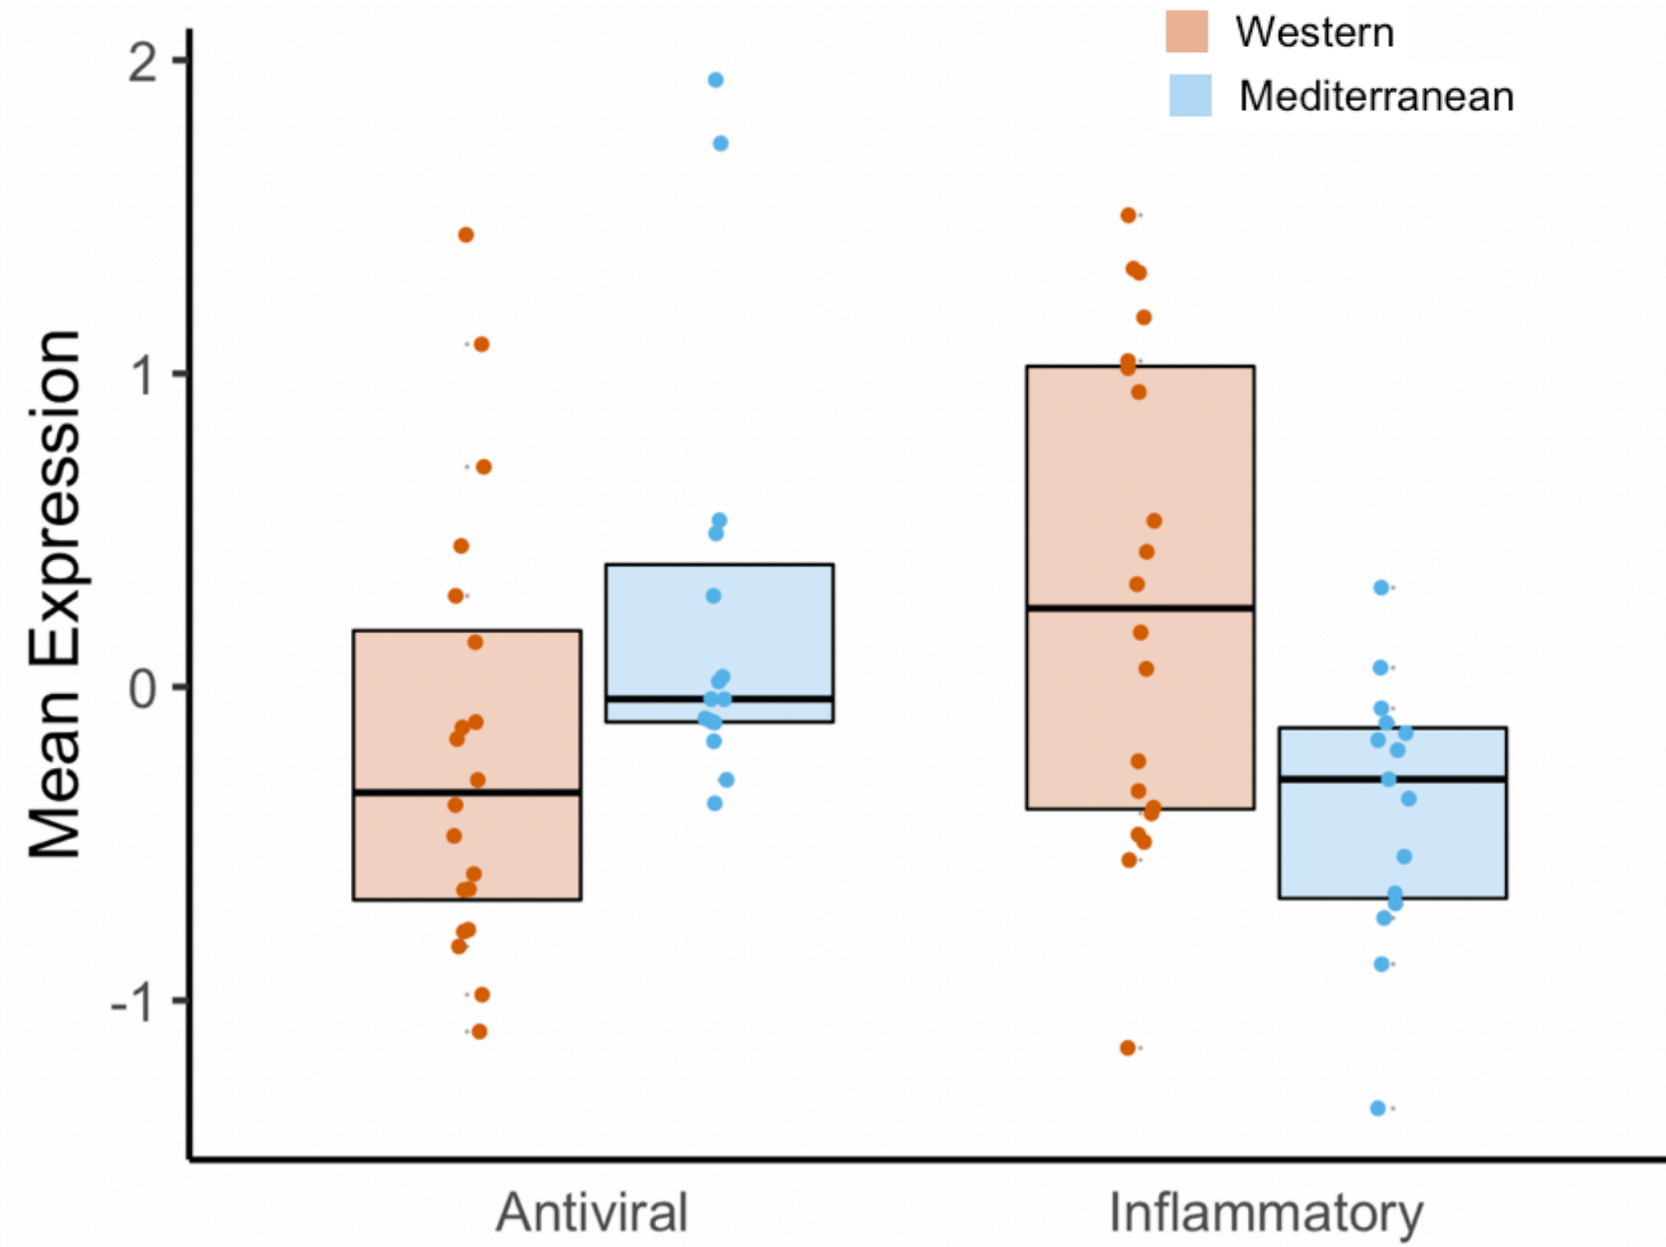

Supplement: supp [file elife_poa_e68293_Figure_1_figure_supplement_2.pdf › elife_poa_e68293_Figure_1_figure_supplement_2.pdf]

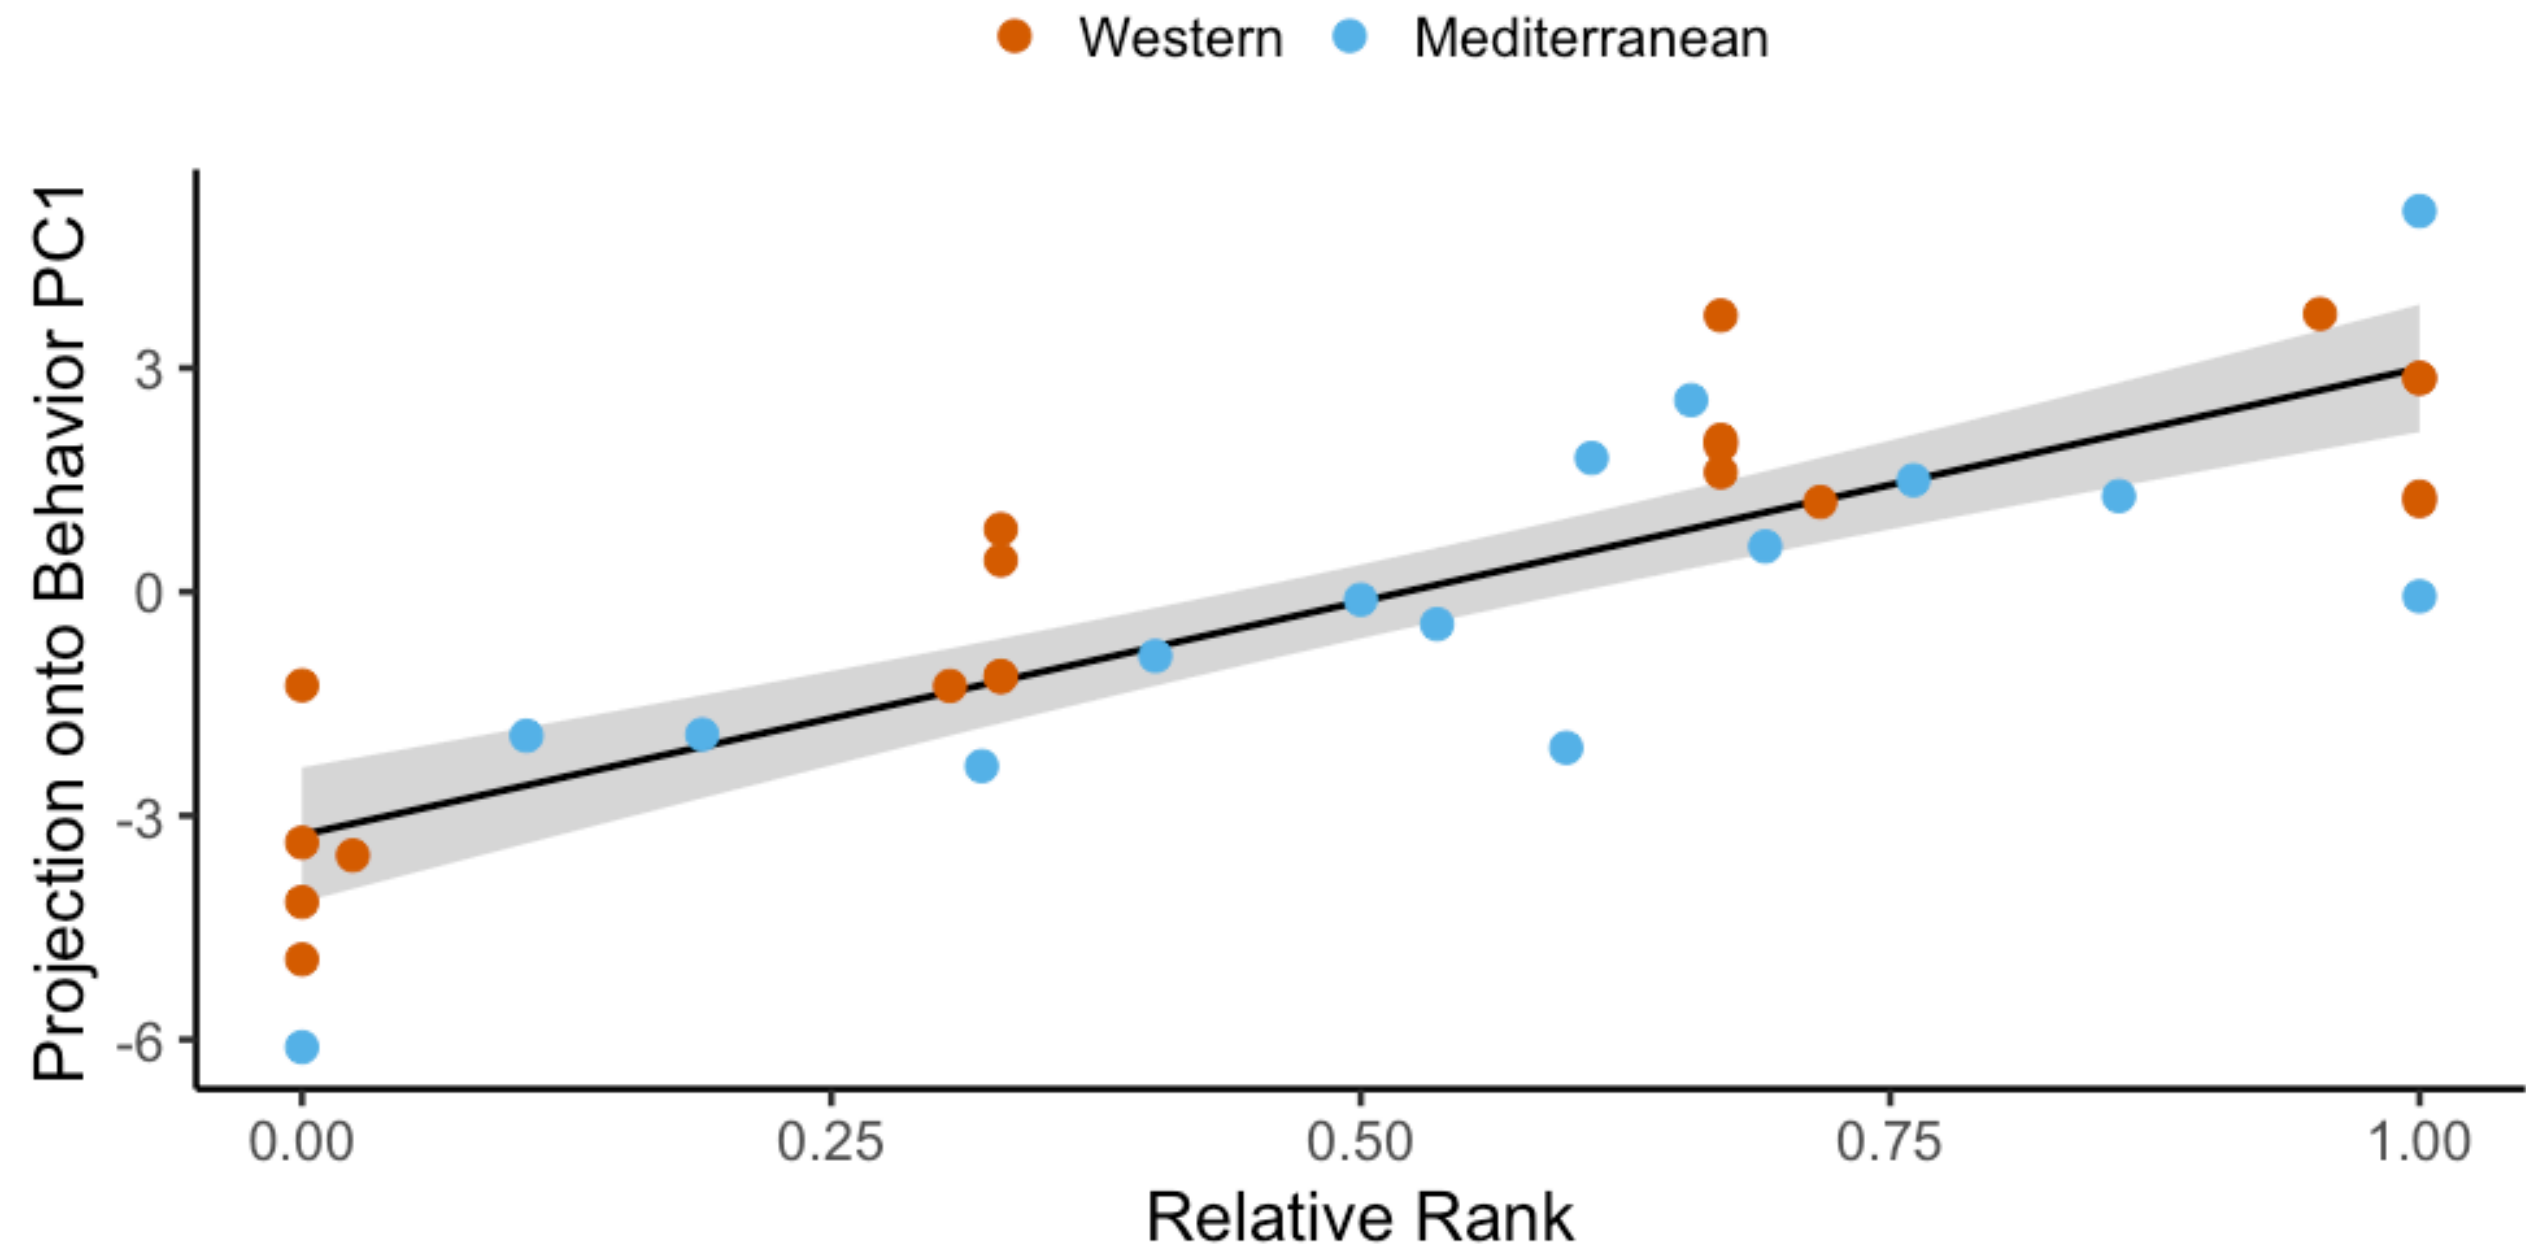

$r = 0.84$

Supplement: supp [file elife_poa_e68293_Figure_4_figure_supplement_2.pdf › elife_poa_e68293_Figure_4_figure_supplement_2.pdf]
